# Supplementary material
Source: publisher figshare collection journal article supplement (https://acs.figshare.com/ndownloader/files/8424500)
Supplement: Supplementary file 1 [file 8424500]

 
data_dzw104
 
_audit_creation_method            'SHELXL-2014/7'
_shelx_SHELXL_version_number      '2014/7'
_chemical_name_systematic         ?
_chemical_name_common             ?
_chemical_melting_point           ?
_chemical_formula_moiety          ?
_chemical_formula_structural
 'SiC4(C6H5)2(Si(CH3)3)2Hf(C5H5)2 *C4H8O'
_chemical_formula_sum
 'C36 H46 Hf O Si3' 
_chemical_formula_weight          757.49

loop_
 _atom_type_symbol
 _atom_type_description
 _atom_type_scat_dispersion_real
 _atom_type_scat_dispersion_imag
 _atom_type_scat_source
 'C'  'C'   0.0033   0.0016
 'International Tables Vol C Tables 4.2.6.8 and 6.1.1.4'
 'H'  'H'   0.0000   0.0000
 'International Tables Vol C Tables 4.2.6.8 and 6.1.1.4'
 'O'  'O'   0.0106   0.0060
 'International Tables Vol C Tables 4.2.6.8 and 6.1.1.4'
 'Si'  'Si'   0.0817   0.0704
 'International Tables Vol C Tables 4.2.6.8 and 6.1.1.4'
 'Hf'  'Hf'  -0.5830   6.1852
 'International Tables Vol C Tables 4.2.6.8 and 6.1.1.4'
 
_space_group_crystal_system       monoclinic
_space_group_IT_number            5
_space_group_name_H-M_alt         'C 2'
_space_group_name_Hall            'C 2y'
 
_shelx_space_group_comment
;
The symmetry employed for this shelxl refinement is uniquely defined
by the following loop, which should always be used as a source of
symmetry information in preference to the above space-group names.
They are only intended as comments.
;
 
loop_
 _space_group_symop_operation_xyz
 'x, y, z'
 '-x, y, -z'
 'x+1/2, y+1/2, z'
 '-x+1/2, y+1/2, -z'
 
_cell_length_a                    39.330(3)
_cell_length_b                    7.9638(6)
_cell_length_c                    10.8208(8)
_cell_angle_alpha                 90
_cell_angle_beta                  93.2487(15)
_cell_angle_gamma                 90
_cell_volume                      3383.8(4)
_cell_formula_units_Z             4
_cell_measurement_temperature     100(2)
_cell_measurement_reflns_used     9770
_cell_measurement_theta_min       2.61
_cell_measurement_theta_max       34.73
 
_exptl_crystal_description        plate
_exptl_crystal_colour             yellow
_exptl_crystal_density_meas       ?
_exptl_crystal_density_method     ?
_exptl_crystal_density_diffrn     1.487          
_exptl_crystal_F_000              1536
_exptl_transmission_factor_min    ?
_exptl_transmission_factor_max    ?
_exptl_crystal_size_max           0.200
_exptl_crystal_size_mid           0.120
_exptl_crystal_size_min           0.050
_exptl_absorpt_coefficient_mu     3.216
_shelx_estimated_absorpt_T_min    0.566
_shelx_estimated_absorpt_T_max    0.856
_exptl_absorpt_correction_type    numerical
_exptl_absorpt_correction_T_min   0.5133
_exptl_absorpt_correction_T_max   0.8969
_exptl_absorpt_process_details    'SADABS-2016/2 (Sheldrick)'
_exptl_absorpt_special_details
;
 numerical absorption correction followed by correction based on
 symmetry-related measurements (multi-scan)
;
_diffrn_ambient_temperature       100(2)
_diffrn_radiation_wavelength      0.71073
_diffrn_radiation_type            MoK\a
_diffrn_source                    'sealed tube'
_diffrn_measurement_device_type   'Bruker APEX-II CCD'
_diffrn_measurement_method        '\f and \w scans'
_diffrn_detector_area_resol_mean  ?
_diffrn_reflns_number             84101
_diffrn_reflns_av_unetI/netI      0.0300
_diffrn_reflns_av_R_equivalents   0.0400
_diffrn_reflns_limit_h_min        -61
_diffrn_reflns_limit_h_max        63
_diffrn_reflns_limit_k_min        -12
_diffrn_reflns_limit_k_max        12
_diffrn_reflns_limit_l_min        -17
_diffrn_reflns_limit_l_max        17
_diffrn_reflns_theta_min          1.885
_diffrn_reflns_theta_max          34.971
_diffrn_reflns_theta_full         25.242
_diffrn_measured_fraction_theta_max   1.000
_diffrn_measured_fraction_theta_full  0.999
_diffrn_reflns_Laue_measured_fraction_max    1.000
_diffrn_reflns_Laue_measured_fraction_full   0.999
_diffrn_reflns_point_group_measured_fraction_max   1.000
_diffrn_reflns_point_group_measured_fraction_full  1.000
_reflns_number_total              14867
_reflns_number_gt                 14078
_reflns_threshold_expression      'I > 2\s(I)'
_reflns_Friedel_coverage          0.890
_reflns_Friedel_fraction_max      1.000
_reflns_Friedel_fraction_full     1.000
 
_reflns_special_details
;
 Reflections were merged by SHELXL according to the crystal
 class for the calculation of statistics and refinement.
 
 _reflns_Friedel_fraction is defined as the number of unique
 Friedel pairs measured divided by the number that would be
 possible theoretically, ignoring centric projections and
 systematic absences.
;
 
_computing_data_collection        'Bruker APEX2'
_computing_cell_refinement        'Bruker SAINT V8.37A'
_computing_data_reduction         'Bruker SAINT V8.37A'
_computing_structure_solution     'SHELXS-2013/1 (Sheldrick, 2013)'
_computing_structure_refinement 'SHELXL-2014/7 (Sheldrick, 2014)'
_computing_molecular_graphics     ?
_computing_publication_material   ?
_refine_special_details           ?
_refine_ls_structure_factor_coef  Fsqd
_refine_ls_matrix_type            full
_refine_ls_weighting_scheme       calc
_refine_ls_weighting_details
'w=1/[\s^2^(Fo^2^)+(0.0200P)^2^+4.0000P] where P=(Fo^2^+2Fc^2^)/3'
_atom_sites_solution_primary      direct
_atom_sites_solution_secondary    difmap
_atom_sites_solution_hydrogens    difmap
_refine_ls_hydrogen_treatment     constr
_refine_ls_extinction_method      none
_refine_ls_extinction_coef        .
_refine_ls_abs_structure_details
;
 Flack x determined using 6185 quotients [(I+)-(I-)]/[(I+)+(I-)]
 (Parsons, Flack and Wagner, Acta Cryst. B69 (2013) 249-259).
;
_refine_ls_abs_structure_Flack    -0.003(2)
_chemical_absolute_configuration  ad
_refine_ls_number_reflns          14867
_refine_ls_number_parameters      421
_refine_ls_number_restraints      1
_refine_ls_R_factor_all           0.0274
_refine_ls_R_factor_gt            0.0246
_refine_ls_wR_factor_ref          0.0512
_refine_ls_wR_factor_gt           0.0505
_refine_ls_goodness_of_fit_ref    1.095
_refine_ls_restrained_S_all       1.095
_refine_ls_shift/su_max           0.001
_refine_ls_shift/su_mean          0.000
 
loop_
 _atom_site_label
 _atom_site_type_symbol
 _atom_site_fract_x
 _atom_site_fract_y
 _atom_site_fract_z
 _atom_site_U_iso_or_equiv
 _atom_site_adp_type
 _atom_site_occupancy
 _atom_site_site_symmetry_order  
 _atom_site_calc_flag
 _atom_site_refinement_flags_posn
 _atom_site_refinement_flags_adp
 _atom_site_refinement_flags_occupancy
 _atom_site_disorder_assembly
 _atom_site_disorder_group
Hf1 Hf 0.60730(2) 0.57072(2) 0.16247(2) 0.01143(3) Uani 1 1 d . . . . .
Si1 Si 0.63942(2) 0.32815(11) 0.33735(8) 0.01378(15) Uani 1 1 d . . . . .
Si2 Si 0.57750(3) 0.51242(14) 0.48379(9) 0.0223(2) Uani 1 1 d . . . . .
Si3 Si 0.68937(2) 0.35051(11) 0.09550(8) 0.01588(16) Uani 1 1 d . . . . .
C1 C 0.60979(8) 0.5256(4) 0.3643(3) 0.0133(5) Uani 1 1 d . . . . .
C2 C 0.64479(7) 0.5885(5) 0.3947(2) 0.0112(6) Uani 1 1 d . . . . .
C3 C 0.66991(7) 0.5465(3) 0.3085(2) 0.0106(6) Uani 1 1 d . . . . .
C4 C 0.65791(8) 0.4514(3) 0.1959(3) 0.0121(5) Uani 1 1 d . . . . .
C5 C 0.65432(8) 0.6761(4) 0.5133(3) 0.0124(5) Uani 1 1 d . . . . .
C6 C 0.64029(9) 0.8332(4) 0.5367(3) 0.0176(6) Uani 1 1 d . . . . .
H6 H 0.6260 0.8860 0.4745 0.021 Uiso 1 1 calc R U . . .
C7 C 0.64688(10) 0.9138(5) 0.6500(3) 0.0223(7) Uani 1 1 d . . . . .
H7 H 0.6369 1.0201 0.6647 0.027 Uiso 1 1 calc R U . . .
C8 C 0.66787(10) 0.8394(5) 0.7409(3) 0.0235(7) Uani 1 1 d . . . . .
H8 H 0.6723 0.8942 0.8181 0.028 Uiso 1 1 calc R U . . .
C9 C 0.68250(9) 0.6829(5) 0.7186(3) 0.0211(6) Uani 1 1 d . . . . .
H9 H 0.6970 0.6313 0.7808 0.025 Uiso 1 1 calc R U . . .
C10 C 0.67582(8) 0.6029(4) 0.6054(3) 0.0159(6) Uani 1 1 d . . . . .
H10 H 0.6860 0.4972 0.5905 0.019 Uiso 1 1 calc R U . . .
C11 C 0.70664(7) 0.5901(4) 0.3352(2) 0.0118(6) Uani 1 1 d . . . . .
C12 C 0.71914(8) 0.7440(4) 0.2994(3) 0.0161(5) Uani 1 1 d . . . . .
H12 H 0.7040 0.8253 0.2632 0.019 Uiso 1 1 calc R U . . .
C13 C 0.75371(9) 0.7809(4) 0.3159(3) 0.0191(6) Uani 1 1 d . . . . .
H13 H 0.7620 0.8867 0.2907 0.023 Uiso 1 1 calc R U . . .
C14 C 0.77597(9) 0.6633(5) 0.3692(3) 0.0198(6) Uani 1 1 d . . . . .
H14 H 0.7996 0.6880 0.3798 0.024 Uiso 1 1 calc R U . . .
C15 C 0.76372(10) 0.5093(5) 0.4069(3) 0.0204(6) Uani 1 1 d . . . . .
H15 H 0.7789 0.4291 0.4442 0.024 Uiso 1 1 calc R U . . .
C16 C 0.72915(9) 0.4722(4) 0.3900(3) 0.0167(6) Uani 1 1 d . . . . .
H16 H 0.7208 0.3666 0.4158 0.020 Uiso 1 1 calc R U . . .
C17 C 0.54764(13) 0.3303(8) 0.4542(4) 0.0470(15) Uani 1 1 d . . . . .
H17A H 0.5609 0.2279 0.4419 0.070 Uiso 1 1 calc R U . . .
H17B H 0.5329 0.3527 0.3800 0.070 Uiso 1 1 calc R U . . .
H17C H 0.5336 0.3153 0.5254 0.070 Uiso 1 1 calc R U . . .
C18 C 0.55096(13) 0.7089(8) 0.4815(5) 0.0427(12) Uani 1 1 d . . . . .
H18A H 0.5408 0.7274 0.3978 0.064 Uiso 1 1 calc R U . . .
H18B H 0.5654 0.8050 0.5061 0.064 Uiso 1 1 calc R U . . .
H18C H 0.5328 0.6969 0.5394 0.064 Uiso 1 1 calc R U . . .
C19 C 0.59473(11) 0.4791(7) 0.6465(3) 0.0328(9) Uani 1 1 d . . . . .
H19A H 0.6070 0.5799 0.6756 0.049 Uiso 1 1 calc R U . . .
H19B H 0.6103 0.3829 0.6494 0.049 Uiso 1 1 calc R U . . .
H19C H 0.5759 0.4572 0.6997 0.049 Uiso 1 1 calc R U . . .
C20 C 0.66959(11) 0.2774(6) -0.0568(4) 0.0319(9) Uani 1 1 d . . . . .
H20A H 0.6526 0.1904 -0.0426 0.048 Uiso 1 1 calc R U . . .
H20B H 0.6873 0.2312 -0.1072 0.048 Uiso 1 1 calc R U . . .
H20C H 0.6585 0.3724 -0.1003 0.048 Uiso 1 1 calc R U . . .
C21 C 0.70957(11) 0.1615(5) 0.1711(4) 0.0306(9) Uani 1 1 d . . . . .
H21A H 0.7271 0.1972 0.2336 0.046 Uiso 1 1 calc R U . . .
H21B H 0.7200 0.0926 0.1085 0.046 Uiso 1 1 calc R U . . .
H21C H 0.6922 0.0956 0.2107 0.046 Uiso 1 1 calc R U . . .
C22 C 0.72436(10) 0.4956(5) 0.0516(3) 0.0256(7) Uani 1 1 d . . . . .
H22A H 0.7367 0.4448 -0.0152 0.038 Uiso 1 1 calc R U . . .
H22B H 0.7401 0.5148 0.1236 0.038 Uiso 1 1 calc R U . . .
H22C H 0.7145 0.6029 0.0233 0.038 Uiso 1 1 calc R U . . .
C23 C 0.55890(11) 0.4986(5) 0.0089(4) 0.0291(9) Uani 1 1 d . . . . .
H23 H 0.5486 0.5856 -0.0403 0.035 Uiso 1 1 calc R U . . .
C24 C 0.54873(10) 0.4461(5) 0.1251(4) 0.0269(8) Uani 1 1 d . . . . .
H24 H 0.5309 0.4932 0.1696 0.032 Uiso 1 1 calc R U . . .
C25 C 0.57001(9) 0.3099(4) 0.1638(3) 0.0194(6) Uani 1 1 d . . . . .
H25 H 0.5687 0.2483 0.2386 0.023 Uiso 1 1 calc R U . . .
C26 C 0.59347(10) 0.2817(5) 0.0720(3) 0.0174(7) Uani 1 1 d . . . . .
H26 H 0.6106 0.1975 0.0738 0.021 Uiso 1 1 calc R U . . .
C27 C 0.58699(11) 0.4005(4) -0.0227(3) 0.0239(7) Uani 1 1 d . . . . .
H27 H 0.5994 0.4126 -0.0951 0.029 Uiso 1 1 calc R U . . .
C28 C 0.63183(9) 0.8662(4) 0.2045(3) 0.0171(6) Uani 1 1 d . . . . .
H28 H 0.6478 0.8845 0.2722 0.020 Uiso 1 1 calc R U . . .
C29 C 0.63963(9) 0.8226(4) 0.0836(3) 0.0184(6) Uani 1 1 d . . . . .
H29 H 0.6618 0.8034 0.0559 0.022 Uiso 1 1 calc R U . . .
C30 C 0.60873(10) 0.8120(4) 0.0104(3) 0.0199(6) Uani 1 1 d . . . . .
H30 H 0.6065 0.7855 -0.0753 0.024 Uiso 1 1 calc R U . . .
C31 C 0.58187(10) 0.8479(5) 0.0873(4) 0.0177(7) Uani 1 1 d . . . . .
H31 H 0.5583 0.8509 0.0624 0.021 Uiso 1 1 calc R U . . .
C32 C 0.59612(9) 0.8784(4) 0.2081(3) 0.0177(6) Uani 1 1 d . . . . .
H32 H 0.5838 0.9028 0.2790 0.021 Uiso 1 1 calc R U . . .
O1A O 0.44821(16) 0.8578(8) 0.2070(6) 0.0297(13) Uani 0.5 1 d . . P A 1
C33A C 0.4847(4) 0.847(2) 0.2084(19) 0.022(2) Uani 0.5 1 d . . P A 1
H33A H 0.4920 0.8258 0.1238 0.027 Uiso 0.5 1 calc R U P A 1
H33B H 0.4929 0.7528 0.2624 0.027 Uiso 0.5 1 calc R U P A 1
C34A C 0.4986(3) 1.0067(14) 0.2560(10) 0.031(2) Uani 0.5 1 d . . P A 1
H34A H 0.5207 1.0313 0.2200 0.037 Uiso 0.5 1 calc R U P A 1
H34B H 0.5022 1.0030 0.3473 0.037 Uiso 0.5 1 calc R U P A 1
C35A C 0.4721(5) 1.140(2) 0.2169(17) 0.019(3) Uani 0.5 1 d . . P A 1
H35A H 0.4740 1.1767 0.1301 0.023 Uiso 0.5 1 calc R U P A 1
H35B H 0.4730 1.2385 0.2727 0.023 Uiso 0.5 1 calc R U P A 1
C36A C 0.44020(19) 1.0281(8) 0.2336(6) 0.0224(14) Uani 0.5 1 d . . P A 1
H36A H 0.4331 1.0374 0.3196 0.027 Uiso 0.5 1 calc R U P A 1
H36B H 0.4211 1.0666 0.1771 0.027 Uiso 0.5 1 calc R U P A 1
O1B O 0.48780(17) 0.8935(8) 0.0998(6) 0.0361(14) Uani 0.5 1 d . . P B 2
C33B C 0.4763(8) 0.846(3) 0.218(2) 0.081(10) Uani 0.5 1 d . . P B 2
H33C H 0.4882 0.7444 0.2510 0.097 Uiso 0.5 1 calc R U P B 2
H33D H 0.4514 0.8263 0.2148 0.097 Uiso 0.5 1 calc R U P B 2
C34B C 0.4864(7) 1.0056(18) 0.2966(13) 0.090(8) Uani 0.5 1 d . . P B 2
H34C H 0.4751 1.0112 0.3759 0.108 Uiso 0.5 1 calc R U P B 2
H34D H 0.5113 1.0195 0.3108 0.108 Uiso 0.5 1 calc R U P B 2
C35B C 0.4715(7) 1.120(3) 0.203(2) 0.053(7) Uani 0.5 1 d . . P B 2
H35C H 0.4465 1.1060 0.1938 0.063 Uiso 0.5 1 calc R U P B 2
H35D H 0.4768 1.2380 0.2244 0.063 Uiso 0.5 1 calc R U P B 2
C36B C 0.4872(2) 1.0717(18) 0.0901(7) 0.0391(19) Uani 0.5 1 d . . P B 2
H36C H 0.4734 1.1088 0.0158 0.047 Uiso 0.5 1 calc R U P B 2
H36D H 0.5104 1.1183 0.0874 0.047 Uiso 0.5 1 calc R U P B 2
 
loop_
 _atom_site_aniso_label
 _atom_site_aniso_U_11
 _atom_site_aniso_U_22
 _atom_site_aniso_U_33
 _atom_site_aniso_U_23
 _atom_site_aniso_U_13
 _atom_site_aniso_U_12
Hf1 0.01373(4) 0.01030(4) 0.01001(4) 0.00067(7) -0.00147(3) -0.00022(8)
Si1 0.0153(4) 0.0123(3) 0.0137(3) 0.0034(3) 0.0012(3) -0.0006(3)
Si2 0.0132(4) 0.0407(5) 0.0131(4) -0.0015(3) 0.0028(3) -0.0052(4)
Si3 0.0190(4) 0.0132(3) 0.0161(4) -0.0025(3) 0.0071(3) -0.0020(3)
C1 0.0122(12) 0.0171(12) 0.0105(10) 0.0007(8) -0.0003(9) -0.0007(9)
C2 0.0133(10) 0.0099(16) 0.0105(9) 0.0010(10) 0.0000(7) 0.0006(11)
C3 0.0148(11) 0.0055(16) 0.0114(9) 0.0016(8) 0.0005(8) 0.0003(8)
C4 0.0155(13) 0.0099(11) 0.0111(11) -0.0001(8) 0.0026(10) -0.0003(9)
C5 0.0119(13) 0.0137(11) 0.0115(11) -0.0008(9) 0.0011(9) -0.0009(10)
C6 0.0183(15) 0.0204(14) 0.0142(12) -0.0012(11) 0.0021(11) 0.0034(12)
C7 0.0254(18) 0.0227(15) 0.0192(14) -0.0072(12) 0.0056(13) 0.0027(13)
C8 0.0259(18) 0.0310(17) 0.0138(13) -0.0077(12) 0.0029(12) -0.0073(14)
C9 0.0193(16) 0.0298(17) 0.0138(13) -0.0006(12) -0.0024(11) -0.0030(13)
C10 0.0167(13) 0.0187(18) 0.0122(10) 0.0000(9) -0.0009(9) 0.0005(10)
C11 0.0140(11) 0.0097(17) 0.0118(9) -0.0001(9) 0.0014(8) 0.0012(10)
C12 0.0142(14) 0.0129(12) 0.0208(13) 0.0004(10) -0.0023(11) -0.0003(10)
C13 0.0166(15) 0.0145(12) 0.0262(15) -0.0020(11) 0.0009(12) -0.0032(11)
C14 0.0127(15) 0.0225(15) 0.0238(16) -0.0046(12) -0.0014(12) -0.0014(12)
C15 0.0155(16) 0.0230(14) 0.0227(15) 0.0025(12) 0.0005(13) 0.0053(12)
C16 0.0149(14) 0.0175(13) 0.0180(13) 0.0037(10) 0.0029(11) 0.0020(11)
C17 0.034(2) 0.083(4) 0.0241(19) -0.008(2) 0.0092(17) -0.035(3)
C18 0.026(2) 0.071(4) 0.031(2) -0.006(2) 0.0054(17) 0.019(2)
C19 0.0247(19) 0.058(3) 0.0163(15) 0.0065(16) 0.0030(13) -0.0147(19)
C20 0.035(2) 0.038(2) 0.0241(17) -0.0183(16) 0.0108(16) -0.0071(17)
C21 0.032(2) 0.0163(14) 0.046(2) 0.0042(15) 0.0164(18) 0.0094(14)
C22 0.030(2) 0.0259(17) 0.0224(16) -0.0039(13) 0.0134(14) -0.0086(14)
C23 0.035(2) 0.0185(16) 0.0314(19) -0.0002(13) -0.0188(16) -0.0013(14)
C24 0.0154(16) 0.0261(17) 0.038(2) -0.0099(15) -0.0059(14) -0.0017(13)
C25 0.0201(16) 0.0184(14) 0.0195(14) 0.0005(11) -0.0003(12) -0.0089(12)
C26 0.0189(18) 0.0145(13) 0.0186(14) -0.0038(11) 0.0000(13) -0.0043(13)
C27 0.036(2) 0.0210(15) 0.0142(13) 0.0001(11) -0.0039(13) -0.0096(14)
C28 0.0219(16) 0.0115(12) 0.0173(13) 0.0011(10) -0.0033(11) -0.0002(11)
C29 0.0211(16) 0.0150(12) 0.0193(14) 0.0047(11) 0.0023(12) -0.0002(11)
C30 0.0278(18) 0.0143(13) 0.0171(13) 0.0046(10) -0.0030(12) -0.0005(12)
C31 0.0147(17) 0.0155(14) 0.0220(16) 0.0025(12) -0.0050(13) 0.0017(13)
C32 0.0207(16) 0.0129(12) 0.0193(14) 0.0009(10) -0.0010(12) 0.0024(11)
O1A 0.023(3) 0.029(3) 0.036(3) 0.002(2) -0.009(2) -0.008(2)
C33A 0.028(4) 0.014(4) 0.024(5) 0.000(3) -0.005(3) 0.003(3)
C34A 0.028(4) 0.027(4) 0.038(5) -0.012(4) -0.004(4) -0.009(3)
C35A 0.023(5) 0.013(4) 0.021(5) -0.006(3) 0.000(4) -0.001(4)
C36A 0.025(3) 0.023(3) 0.020(3) 0.000(2) 0.004(2) -0.006(2)
O1B 0.037(4) 0.036(3) 0.034(3) -0.011(3) -0.006(3) 0.006(3)
C33B 0.17(3) 0.034(9) 0.034(9) 0.002(7) -0.028(16) -0.033(15)
C34B 0.21(3) 0.028(5) 0.033(7) -0.005(5) 0.001(10) -0.001(10)
C35B 0.072(12) 0.057(15) 0.031(7) 0.013(7) 0.018(7) 0.048(10)
C36B 0.049(5) 0.042(4) 0.027(3) -0.014(5) 0.006(3) -0.027(6)
 
_geom_special_details
;
 All esds (except the esd in the dihedral angle between two l.s. planes)
 are estimated using the full covariance matrix.  The cell esds are taken
 into account individually in the estimation of esds in distances, angles
 and torsion angles; correlations between esds in cell parameters are only
 used when they are defined by crystal symmetry.  An approximate (isotropic)
 treatment of cell esds is used for estimating esds involving l.s. planes.
;
 
loop_
 _geom_bond_atom_site_label_1
 _geom_bond_atom_site_label_2
 _geom_bond_distance
 _geom_bond_site_symmetry_2
 _geom_bond_publ_flag
Hf1 C1 2.210(3) . ?
Hf1 C4 2.217(3) . ?
Hf1 C27 2.512(3) . ?
Hf1 C24 2.520(4) . ?
Hf1 C23 2.522(4) . ?
Hf1 C30 2.532(3) . ?
Hf1 C31 2.538(4) . ?
Hf1 C32 2.543(3) . ?
Hf1 C25 2.543(3) . ?
Hf1 C29 2.547(3) . ?
Hf1 C26 2.548(4) . ?
Hf1 C28 2.574(3) . ?
Si1 C1 1.988(3) . ?
Si1 C4 1.990(3) . ?
Si1 C3 2.145(3) . ?
Si1 C2 2.171(4) . ?
Si2 C1 1.866(3) . ?
Si2 C19 1.869(4) . ?
Si2 C18 1.881(5) . ?
Si2 C17 1.882(5) . ?
Si3 C21 1.868(4) . ?
Si3 C4 1.874(3) . ?
Si3 C20 1.875(4) . ?
Si3 C22 1.878(4) . ?
C1 C2 1.484(4) . ?
C2 C3 1.436(4) . ?
C2 C5 1.490(4) . ?
C3 C4 1.488(4) . ?
C3 C11 1.498(4) . ?
C5 C10 1.397(4) . ?
C5 C6 1.397(4) . ?
C6 C7 1.395(5) . ?
C6 H6 0.9500 . ?
C7 C8 1.382(5) . ?
C7 H7 0.9500 . ?
C8 C9 1.399(5) . ?
C8 H8 0.9500 . ?
C9 C10 1.393(4) . ?
C9 H9 0.9500 . ?
C10 H10 0.9500 . ?
C11 C12 1.384(5) . ?
C11 C16 1.399(4) . ?
C12 C13 1.392(5) . ?
C12 H12 0.9500 . ?
C13 C14 1.385(5) . ?
C13 H13 0.9500 . ?
C14 C15 1.387(5) . ?
C14 H14 0.9500 . ?
C15 C16 1.393(5) . ?
C15 H15 0.9500 . ?
C16 H16 0.9500 . ?
C17 H17A 0.9800 . ?
C17 H17B 0.9800 . ?
C17 H17C 0.9800 . ?
C18 H18A 0.9800 . ?
C18 H18B 0.9800 . ?
C18 H18C 0.9800 . ?
C19 H19A 0.9800 . ?
C19 H19B 0.9800 . ?
C19 H19C 0.9800 . ?
C20 H20A 0.9800 . ?
C20 H20B 0.9800 . ?
C20 H20C 0.9800 . ?
C21 H21A 0.9800 . ?
C21 H21B 0.9800 . ?
C21 H21C 0.9800 . ?
C22 H22A 0.9800 . ?
C22 H22B 0.9800 . ?
C22 H22C 0.9800 . ?
C23 C24 1.405(6) . ?
C23 C27 1.411(6) . ?
C23 H23 0.9500 . ?
C24 C25 1.419(5) . ?
C24 H24 0.9500 . ?
C25 C26 1.412(5) . ?
C25 H25 0.9500 . ?
C26 C27 1.407(5) . ?
C26 H26 0.9500 . ?
C27 H27 0.9500 . ?
C28 C29 1.404(5) . ?
C28 C32 1.411(5) . ?
C28 H28 0.9500 . ?
C29 C30 1.415(5) . ?
C29 H29 0.9500 . ?
C30 C31 1.411(5) . ?
C30 H30 0.9500 . ?
C31 C32 1.413(5) . ?
C31 H31 0.9500 . ?
C32 H32 0.9500 . ?
O1A C36A 1.425(9) . ?
O1A C33A 1.436(16) . ?
C33A C34A 1.47(2) . ?
C33A H33A 0.9900 . ?
C33A H33B 0.9900 . ?
C34A C35A 1.53(3) . ?
C34A H34A 0.9900 . ?
C34A H34B 0.9900 . ?
C35A C36A 1.558(16) . ?
C35A H35A 0.9900 . ?
C35A H35B 0.9900 . ?
C36A H36A 0.9900 . ?
C36A H36B 0.9900 . ?
O1B C36B 1.423(16) . ?
O1B C33B 1.43(3) . ?
C33B C34B 1.57(3) . ?
C33B H33C 0.9900 . ?
C33B H33D 0.9900 . ?
C34B C35B 1.46(3) . ?
C34B H34C 0.9900 . ?
C34B H34D 0.9900 . ?
C35B C36B 1.45(2) . ?
C35B H35C 0.9900 . ?
C35B H35D 0.9900 . ?
C36B H36C 0.9900 . ?
C36B H36D 0.9900 . ?
 
loop_
 _geom_angle_atom_site_label_1
 _geom_angle_atom_site_label_2
 _geom_angle_atom_site_label_3
 _geom_angle
 _geom_angle_site_symmetry_1
 _geom_angle_site_symmetry_3
 _geom_angle_publ_flag
C1 Hf1 C4 77.28(11) . . ?
C1 Hf1 C27 134.00(11) . . ?
C4 Hf1 C27 98.12(12) . . ?
C1 Hf1 C24 94.77(13) . . ?
C4 Hf1 C24 131.44(12) . . ?
C27 Hf1 C24 54.05(14) . . ?
C1 Hf1 C23 127.14(13) . . ?
C4 Hf1 C23 130.36(12) . . ?
C27 Hf1 C23 32.55(14) . . ?
C24 Hf1 C23 32.37(14) . . ?
C1 Hf1 C30 139.83(11) . . ?
C4 Hf1 C30 112.24(11) . . ?
C27 Hf1 C30 84.77(11) . . ?
C24 Hf1 C30 104.38(13) . . ?
C23 Hf1 C30 77.77(12) . . ?
C1 Hf1 C31 116.91(12) . . ?
C4 Hf1 C31 139.37(11) . . ?
C27 Hf1 C31 96.43(12) . . ?
C24 Hf1 C31 87.18(13) . . ?
C23 Hf1 C31 73.60(12) . . ?
C30 Hf1 C31 32.31(12) . . ?
C1 Hf1 C32 87.91(11) . . ?
C4 Hf1 C32 123.02(11) . . ?
C27 Hf1 C32 128.61(12) . . ?
C24 Hf1 C32 104.11(12) . . ?
C23 Hf1 C32 102.40(12) . . ?
C30 Hf1 C32 53.51(11) . . ?
C31 Hf1 C32 32.29(11) . . ?
C1 Hf1 C25 81.64(11) . . ?
C4 Hf1 C25 99.32(11) . . ?
C27 Hf1 C25 53.58(11) . . ?
C24 Hf1 C25 32.54(12) . . ?
C23 Hf1 C25 53.39(12) . . ?
C30 Hf1 C25 131.10(11) . . ?
C31 Hf1 C25 119.67(12) . . ?
C32 Hf1 C25 132.82(12) . . ?
C1 Hf1 C29 117.65(11) . . ?
C4 Hf1 C29 86.07(11) . . ?
C27 Hf1 C29 107.46(11) . . ?
C24 Hf1 C29 136.50(13) . . ?
C23 Hf1 C29 109.33(12) . . ?
C30 Hf1 C29 32.35(11) . . ?
C31 Hf1 C29 53.35(12) . . ?
C32 Hf1 C29 53.23(11) . . ?
C25 Hf1 C29 160.70(11) . . ?
C1 Hf1 C26 103.25(11) . . ?
C4 Hf1 C26 81.14(12) . . ?
C27 Hf1 C26 32.29(12) . . ?
C24 Hf1 C26 53.79(13) . . ?
C23 Hf1 C26 53.43(12) . . ?
C30 Hf1 C26 116.61(12) . . ?
C31 Hf1 C26 126.21(11) . . ?
C32 Hf1 C26 155.43(12) . . ?
C25 Hf1 C26 32.19(12) . . ?
C29 Hf1 C26 133.03(11) . . ?
C1 Hf1 C28 88.80(10) . . ?
C4 Hf1 C28 92.22(11) . . ?
C27 Hf1 C28 137.17(11) . . ?
C24 Hf1 C28 135.92(12) . . ?
C23 Hf1 C28 125.87(11) . . ?
C30 Hf1 C28 53.07(11) . . ?
C31 Hf1 C28 53.02(11) . . ?
C32 Hf1 C28 32.00(11) . . ?
C25 Hf1 C28 162.97(11) . . ?
C29 Hf1 C28 31.81(11) . . ?
C26 Hf1 C28 164.47(11) . . ?
C1 Si1 C4 88.02(12) . . ?
C1 Si1 C3 73.59(12) . . ?
C4 Si1 C3 41.97(11) . . ?
C1 Si1 C2 41.52(11) . . ?
C4 Si1 C2 73.43(11) . . ?
C3 Si1 C2 38.87(10) . . ?
C1 Si1 Hf1 48.74(8) . . ?
C4 Si1 Hf1 48.94(9) . . ?
C3 Si1 Hf1 66.22(8) . . ?
C2 Si1 Hf1 65.64(8) . . ?
C1 Si2 C19 115.85(17) . . ?
C1 Si2 C18 110.1(2) . . ?
C19 Si2 C18 107.6(2) . . ?
C1 Si2 C17 111.59(18) . . ?
C19 Si2 C17 103.9(2) . . ?
C18 Si2 C17 107.4(3) . . ?
C21 Si3 C4 111.71(16) . . ?
C21 Si3 C20 106.2(2) . . ?
C4 Si3 C20 112.85(17) . . ?
C21 Si3 C22 107.9(2) . . ?
C4 Si3 C22 113.60(15) . . ?
C20 Si3 C22 103.99(18) . . ?
C2 C1 Si2 121.6(2) . . ?
C2 C1 Si1 75.9(2) . . ?
Si2 C1 Si1 119.01(15) . . ?
C2 C1 Hf1 98.78(17) . . ?
Si2 C1 Hf1 134.45(16) . . ?
Si1 C1 Hf1 88.70(11) . . ?
C3 C2 C1 116.1(3) . . ?
C3 C2 C5 121.3(3) . . ?
C1 C2 C5 122.3(2) . . ?
C3 C2 Si1 69.58(18) . . ?
C1 C2 Si1 62.62(18) . . ?
C5 C2 Si1 135.1(2) . . ?
C2 C3 C4 116.9(3) . . ?
C2 C3 C11 120.8(2) . . ?
C4 C3 C11 122.2(2) . . ?
C2 C3 Si1 71.55(19) . . ?
C4 C3 Si1 63.43(15) . . ?
C11 C3 Si1 134.5(2) . . ?
C3 C4 Si3 120.3(2) . . ?
C3 C4 Si1 74.60(15) . . ?
Si3 C4 Si1 121.09(15) . . ?
C3 C4 Hf1 98.96(18) . . ?
Si3 C4 Hf1 134.86(15) . . ?
Si1 C4 Hf1 88.46(12) . . ?
C10 C5 C6 118.3(3) . . ?
C10 C5 C2 122.1(3) . . ?
C6 C5 C2 119.5(3) . . ?
C7 C6 C5 121.1(3) . . ?
C7 C6 H6 119.5 . . ?
C5 C6 H6 119.5 . . ?
C8 C7 C6 120.1(3) . . ?
C8 C7 H7 119.9 . . ?
C6 C7 H7 119.9 . . ?
C7 C8 C9 119.6(3) . . ?
C7 C8 H8 120.2 . . ?
C9 C8 H8 120.2 . . ?
C10 C9 C8 120.0(3) . . ?
C10 C9 H9 120.0 . . ?
C8 C9 H9 120.0 . . ?
C9 C10 C5 120.9(3) . . ?
C9 C10 H10 119.6 . . ?
C5 C10 H10 119.6 . . ?
C12 C11 C16 119.1(3) . . ?
C12 C11 C3 120.4(3) . . ?
C16 C11 C3 120.4(3) . . ?
C11 C12 C13 120.7(3) . . ?
C11 C12 H12 119.6 . . ?
C13 C12 H12 119.6 . . ?
C14 C13 C12 120.0(3) . . ?
C14 C13 H13 120.0 . . ?
C12 C13 H13 120.0 . . ?
C13 C14 C15 119.9(3) . . ?
C13 C14 H14 120.1 . . ?
C15 C14 H14 120.1 . . ?
C14 C15 C16 120.1(3) . . ?
C14 C15 H15 119.9 . . ?
C16 C15 H15 119.9 . . ?
C15 C16 C11 120.2(3) . . ?
C15 C16 H16 119.9 . . ?
C11 C16 H16 119.9 . . ?
Si2 C17 H17A 109.5 . . ?
Si2 C17 H17B 109.5 . . ?
H17A C17 H17B 109.5 . . ?
Si2 C17 H17C 109.5 . . ?
H17A C17 H17C 109.5 . . ?
H17B C17 H17C 109.5 . . ?
Si2 C18 H18A 109.5 . . ?
Si2 C18 H18B 109.5 . . ?
H18A C18 H18B 109.5 . . ?
Si2 C18 H18C 109.5 . . ?
H18A C18 H18C 109.5 . . ?
H18B C18 H18C 109.5 . . ?
Si2 C19 H19A 109.5 . . ?
Si2 C19 H19B 109.5 . . ?
H19A C19 H19B 109.5 . . ?
Si2 C19 H19C 109.5 . . ?
H19A C19 H19C 109.5 . . ?
H19B C19 H19C 109.5 . . ?
Si3 C20 H20A 109.5 . . ?
Si3 C20 H20B 109.5 . . ?
H20A C20 H20B 109.5 . . ?
Si3 C20 H20C 109.5 . . ?
H20A C20 H20C 109.5 . . ?
H20B C20 H20C 109.5 . . ?
Si3 C21 H21A 109.5 . . ?
Si3 C21 H21B 109.5 . . ?
H21A C21 H21B 109.5 . . ?
Si3 C21 H21C 109.5 . . ?
H21A C21 H21C 109.5 . . ?
H21B C21 H21C 109.5 . . ?
Si3 C22 H22A 109.5 . . ?
Si3 C22 H22B 109.5 . . ?
H22A C22 H22B 109.5 . . ?
Si3 C22 H22C 109.5 . . ?
H22A C22 H22C 109.5 . . ?
H22B C22 H22C 109.5 . . ?
C24 C23 C27 108.6(3) . . ?
C24 C23 Hf1 73.8(2) . . ?
C27 C23 Hf1 73.3(2) . . ?
C24 C23 H23 125.7 . . ?
C27 C23 H23 125.7 . . ?
Hf1 C23 H23 119.0 . . ?
C23 C24 C25 107.4(3) . . ?
C23 C24 Hf1 73.9(2) . . ?
C25 C24 Hf1 74.6(2) . . ?
C23 C24 H24 126.3 . . ?
C25 C24 H24 126.3 . . ?
Hf1 C24 H24 117.3 . . ?
C26 C25 C24 108.2(3) . . ?
C26 C25 Hf1 74.1(2) . . ?
C24 C25 Hf1 72.8(2) . . ?
C26 C25 H25 125.9 . . ?
C24 C25 H25 125.9 . . ?
Hf1 C25 H25 119.1 . . ?
C27 C26 C25 107.9(3) . . ?
C27 C26 Hf1 72.4(2) . . ?
C25 C26 Hf1 73.74(19) . . ?
C27 C26 H26 126.1 . . ?
C25 C26 H26 126.1 . . ?
Hf1 C26 H26 119.6 . . ?
C26 C27 C23 108.0(3) . . ?
C26 C27 Hf1 75.3(2) . . ?
C23 C27 Hf1 74.1(2) . . ?
C26 C27 H27 126.0 . . ?
C23 C27 H27 126.0 . . ?
Hf1 C27 H27 116.7 . . ?
C29 C28 C32 108.2(3) . . ?
C29 C28 Hf1 73.04(18) . . ?
C32 C28 Hf1 72.76(18) . . ?
C29 C28 H28 125.9 . . ?
C32 C28 H28 125.9 . . ?
Hf1 C28 H28 120.1 . . ?
C28 C29 C30 108.1(3) . . ?
C28 C29 Hf1 75.15(18) . . ?
C30 C29 Hf1 73.24(19) . . ?
C28 C29 H29 126.0 . . ?
C30 C29 H29 126.0 . . ?
Hf1 C29 H29 117.6 . . ?
C31 C30 C29 107.8(3) . . ?
C31 C30 Hf1 74.1(2) . . ?
C29 C30 Hf1 74.41(18) . . ?
C31 C30 H30 126.1 . . ?
C29 C30 H30 126.1 . . ?
Hf1 C30 H30 117.5 . . ?
C30 C31 C32 108.0(3) . . ?
C30 C31 Hf1 73.6(2) . . ?
C32 C31 Hf1 74.04(19) . . ?
C30 C31 H31 126.0 . . ?
C32 C31 H31 126.0 . . ?
Hf1 C31 H31 118.3 . . ?
C28 C32 C31 107.8(3) . . ?
C28 C32 Hf1 75.23(18) . . ?
C31 C32 Hf1 73.7(2) . . ?
C28 C32 H32 126.1 . . ?
C31 C32 H32 126.1 . . ?
Hf1 C32 H32 117.1 . . ?
C36A O1A C33A 106.8(9) . . ?
O1A C33A C34A 107.6(11) . . ?
O1A C33A H33A 110.2 . . ?
C34A C33A H33A 110.2 . . ?
O1A C33A H33B 110.2 . . ?
C34A C33A H33B 110.2 . . ?
H33A C33A H33B 108.5 . . ?
C33A C34A C35A 105.6(10) . . ?
C33A C34A H34A 110.6 . . ?
C35A C34A H34A 110.6 . . ?
C33A C34A H34B 110.6 . . ?
C35A C34A H34B 110.6 . . ?
H34A C34A H34B 108.7 . . ?
C34A C35A C36A 96.5(11) . . ?
C34A C35A H35A 112.5 . . ?
C36A C35A H35A 112.5 . . ?
C34A C35A H35B 112.5 . . ?
C36A C35A H35B 112.5 . . ?
H35A C35A H35B 110.0 . . ?
O1A C36A C35A 109.4(9) . . ?
O1A C36A H36A 109.8 . . ?
C35A C36A H36A 109.8 . . ?
O1A C36A H36B 109.8 . . ?
C35A C36A H36B 109.8 . . ?
H36A C36A H36B 108.2 . . ?
C36B O1B C33B 108.9(12) . . ?
O1B C33B C34B 100.7(18) . . ?
O1B C33B H33C 111.6 . . ?
C34B C33B H33C 111.6 . . ?
O1B C33B H33D 111.6 . . ?
C34B C33B H33D 111.6 . . ?
H33C C33B H33D 109.4 . . ?
C35B C34B C33B 92.8(16) . . ?
C35B C34B H34C 113.1 . . ?
C33B C34B H34C 113.1 . . ?
C35B C34B H34D 113.1 . . ?
C33B C34B H34D 113.1 . . ?
H34C C34B H34D 110.5 . . ?
C36B C35B C34B 104.3(18) . . ?
C36B C35B H35C 110.9 . . ?
C34B C35B H35C 110.9 . . ?
C36B C35B H35D 110.9 . . ?
C34B C35B H35D 110.9 . . ?
H35C C35B H35D 108.9 . . ?
O1B C36B C35B 102.0(11) . . ?
O1B C36B H36C 111.4 . . ?
C35B C36B H36C 111.4 . . ?
O1B C36B H36D 111.4 . . ?
C35B C36B H36D 111.4 . . ?
H36C C36B H36D 109.2 . . ?
 
loop_
 _geom_torsion_atom_site_label_1
 _geom_torsion_atom_site_label_2
 _geom_torsion_atom_site_label_3
 _geom_torsion_atom_site_label_4
 _geom_torsion
 _geom_torsion_site_symmetry_1
 _geom_torsion_site_symmetry_2
 _geom_torsion_site_symmetry_3
 _geom_torsion_site_symmetry_4
 _geom_torsion_publ_flag
C19 Si2 C1 C2 -28.8(3) . . . . ?
C18 Si2 C1 C2 93.5(3) . . . . ?
C17 Si2 C1 C2 -147.4(3) . . . . ?
C19 Si2 C1 Si1 62.0(3) . . . . ?
C18 Si2 C1 Si1 -175.7(2) . . . . ?
C17 Si2 C1 Si1 -56.6(3) . . . . ?
C19 Si2 C1 Hf1 -177.5(2) . . . . ?
C18 Si2 C1 Hf1 -55.2(3) . . . . ?
C17 Si2 C1 Hf1 63.9(3) . . . . ?
Si2 C1 C2 C3 161.8(2) . . . . ?
Si1 C1 C2 C3 46.2(3) . . . . ?
Hf1 C1 C2 C3 -40.2(3) . . . . ?
Si2 C1 C2 C5 -12.5(4) . . . . ?
Si1 C1 C2 C5 -128.1(3) . . . . ?
Hf1 C1 C2 C5 145.5(3) . . . . ?
Si2 C1 C2 Si1 115.6(2) . . . . ?
Hf1 C1 C2 Si1 -86.41(12) . . . . ?
C1 C2 C3 C4 2.6(4) . . . . ?
C5 C2 C3 C4 177.0(3) . . . . ?
Si1 C2 C3 C4 45.7(2) . . . . ?
C1 C2 C3 C11 -174.5(3) . . . . ?
C5 C2 C3 C11 -0.2(5) . . . . ?
Si1 C2 C3 C11 -131.4(3) . . . . ?
C1 C2 C3 Si1 -43.2(3) . . . . ?
C5 C2 C3 Si1 131.2(3) . . . . ?
C2 C3 C4 Si3 -166.8(2) . . . . ?
C11 C3 C4 Si3 10.3(4) . . . . ?
Si1 C3 C4 Si3 -117.4(2) . . . . ?
C2 C3 C4 Si1 -49.4(2) . . . . ?
C11 C3 C4 Si1 127.6(3) . . . . ?
C2 C3 C4 Hf1 36.5(3) . . . . ?
C11 C3 C4 Hf1 -146.5(2) . . . . ?
Si1 C3 C4 Hf1 85.89(12) . . . . ?
C21 Si3 C4 C3 72.4(3) . . . . ?
C20 Si3 C4 C3 -167.9(2) . . . . ?
C22 Si3 C4 C3 -49.9(3) . . . . ?
C21 Si3 C4 Si1 -17.1(3) . . . . ?
C20 Si3 C4 Si1 102.5(2) . . . . ?
C22 Si3 C4 Si1 -139.4(2) . . . . ?
C21 Si3 C4 Hf1 -140.9(2) . . . . ?
C20 Si3 C4 Hf1 -21.3(3) . . . . ?
C22 Si3 C4 Hf1 96.8(2) . . . . ?
C3 C2 C5 C10 -63.6(4) . . . . ?
C1 C2 C5 C10 110.4(4) . . . . ?
Si1 C2 C5 C10 28.2(5) . . . . ?
C3 C2 C5 C6 119.3(3) . . . . ?
C1 C2 C5 C6 -66.7(4) . . . . ?
Si1 C2 C5 C6 -148.8(3) . . . . ?
C10 C5 C6 C7 -1.4(5) . . . . ?
C2 C5 C6 C7 175.7(3) . . . . ?
C5 C6 C7 C8 0.7(5) . . . . ?
C6 C7 C8 C9 0.1(6) . . . . ?
C7 C8 C9 C10 -0.1(5) . . . . ?
C8 C9 C10 C5 -0.6(5) . . . . ?
C6 C5 C10 C9 1.4(5) . . . . ?
C2 C5 C10 C9 -175.7(3) . . . . ?
C2 C3 C11 C12 -88.8(4) . . . . ?
C4 C3 C11 C12 94.2(4) . . . . ?
Si1 C3 C11 C12 177.2(2) . . . . ?
C2 C3 C11 C16 94.9(4) . . . . ?
C4 C3 C11 C16 -82.0(3) . . . . ?
Si1 C3 C11 C16 1.0(4) . . . . ?
C16 C11 C12 C13 0.9(5) . . . . ?
C3 C11 C12 C13 -175.4(3) . . . . ?
C11 C12 C13 C14 -0.3(5) . . . . ?
C12 C13 C14 C15 -0.5(5) . . . . ?
C13 C14 C15 C16 0.7(5) . . . . ?
C14 C15 C16 C11 -0.1(5) . . . . ?
C12 C11 C16 C15 -0.7(5) . . . . ?
C3 C11 C16 C15 175.6(3) . . . . ?
C27 C23 C24 C25 -2.1(4) . . . . ?
Hf1 C23 C24 C25 -67.7(2) . . . . ?
C27 C23 C24 Hf1 65.6(3) . . . . ?
C23 C24 C25 C26 1.0(4) . . . . ?
Hf1 C24 C25 C26 -66.2(2) . . . . ?
C23 C24 C25 Hf1 67.2(3) . . . . ?
C24 C25 C26 C27 0.5(4) . . . . ?
Hf1 C25 C26 C27 -64.9(2) . . . . ?
C24 C25 C26 Hf1 65.4(2) . . . . ?
C25 C26 C27 C23 -1.8(4) . . . . ?
Hf1 C26 C27 C23 -67.5(2) . . . . ?
C25 C26 C27 Hf1 65.8(2) . . . . ?
C24 C23 C27 C26 2.4(4) . . . . ?
Hf1 C23 C27 C26 68.3(3) . . . . ?
C24 C23 C27 Hf1 -65.9(3) . . . . ?
C32 C28 C29 C30 1.6(4) . . . . ?
Hf1 C28 C29 C30 66.4(2) . . . . ?
C32 C28 C29 Hf1 -64.8(2) . . . . ?
C28 C29 C30 C31 -0.6(4) . . . . ?
Hf1 C29 C30 C31 67.1(2) . . . . ?
C28 C29 C30 Hf1 -67.7(2) . . . . ?
C29 C30 C31 C32 -0.7(4) . . . . ?
Hf1 C30 C31 C32 66.6(2) . . . . ?
C29 C30 C31 Hf1 -67.3(2) . . . . ?
C29 C28 C32 C31 -2.1(4) . . . . ?
Hf1 C28 C32 C31 -67.0(2) . . . . ?
C29 C28 C32 Hf1 64.9(2) . . . . ?
C30 C31 C32 C28 1.7(4) . . . . ?
Hf1 C31 C32 C28 68.1(2) . . . . ?
C30 C31 C32 Hf1 -66.3(2) . . . . ?
C36A O1A C33A C34A 8.9(15) . . . . ?
O1A C33A C34A C35A -30.3(16) . . . . ?
C33A C34A C35A C36A 36.1(14) . . . . ?
C33A O1A C36A C35A 15.7(13) . . . . ?
C34A C35A C36A O1A -31.9(12) . . . . ?
C36B O1B C33B C34B -27(2) . . . . ?
O1B C33B C34B C35B 48(2) . . . . ?
C33B C34B C35B C36B -54(2) . . . . ?
C33B O1B C36B C35B -5.7(19) . . . . ?
C34B C35B C36B O1B 39.8(18) . . . . ?
 
_refine_diff_density_max    1.077
_refine_diff_density_min   -3.114
_refine_diff_density_rms    0.097

_shelx_res_file
;

    dzw104.res created by SHELXL-2014/7

TITL SiC4(C6H5)2(Si(CH3)3)2Hf(C5H5)2 *C4H8O in C2
CELL 0.71073 39.3303 7.9638 10.8208 90 93.2487 90
ZERR 4 0.0028 0.0006 0.0008 0 0.0015 0
LATT -7
SYMM -X,+Y,-Z
SFAC C H O Si Hf
UNIT 144 184 4 12 4

L.S. 10
PLAN  50
SIZE 0.2 0.12 0.05
TEMP -173
BOND $H
fmap 2
acta
CONF
SHEL 20 0.62
OMIT 2 0 0
REM <olex2.extras>
REM <HklSrc "%.\\dzw104.hkl">
REM </olex2.extras>

WGHT    0.020000    4.000000
FVAR       0.06823
HF1   5    0.607304    0.570720    0.162471    11.00000    0.01373    0.01030 =
         0.01001    0.00067   -0.00147   -0.00022
SI1   4    0.639423    0.328148    0.337349    11.00000    0.01529    0.01235 =
         0.01374    0.00345    0.00122   -0.00061
SI2   4    0.577498    0.512422    0.483794    11.00000    0.01322    0.04070 =
         0.01310   -0.00146    0.00275   -0.00523
SI3   4    0.689372    0.350510    0.095503    11.00000    0.01902    0.01319 =
         0.01613   -0.00250    0.00709   -0.00195
C1    1    0.609785    0.525553    0.364282    11.00000    0.01216    0.01710 =
         0.01054    0.00071   -0.00034   -0.00066
C2    1    0.644786    0.588532    0.394718    11.00000    0.01326    0.00990 =
         0.01046    0.00101    0.00002    0.00056
C3    1    0.669909    0.546530    0.308488    11.00000    0.01481    0.00546 =
         0.01137    0.00164    0.00050    0.00025
C4    1    0.657914    0.451445    0.195940    11.00000    0.01546    0.00988 =
         0.01115   -0.00009    0.00259   -0.00027
C5    1    0.654325    0.676084    0.513348    11.00000    0.01194    0.01369 =
         0.01149   -0.00083    0.00108   -0.00089
C6    1    0.640285    0.833209    0.536729    11.00000    0.01833    0.02039 =
         0.01421   -0.00119    0.00213    0.00337
AFIX  43
H6    2    0.626019    0.886029    0.474491    11.00000   -1.20000
AFIX   0
C7    1    0.646875    0.913831    0.650012    11.00000    0.02543    0.02266 =
         0.01921   -0.00723    0.00563    0.00274
AFIX  43
H7    2    0.636907    1.020126    0.664676    11.00000   -1.20000
AFIX   0
C8    1    0.667868    0.839404    0.740916    11.00000    0.02585    0.03097 =
         0.01377   -0.00769    0.00288   -0.00727
AFIX  43
H8    2    0.672346    0.894161    0.818125    11.00000   -1.20000
AFIX   0
C9    1    0.682498    0.682942    0.718640    11.00000    0.01928    0.02984 =
         0.01377   -0.00063   -0.00241   -0.00303
AFIX  43
H9    2    0.696987    0.631262    0.780759    11.00000   -1.20000
AFIX   0
C10   1    0.675821    0.602938    0.605379    11.00000    0.01667    0.01872 =
         0.01219    0.00000   -0.00094    0.00047
AFIX  43
H10   2    0.686022    0.497247    0.590547    11.00000   -1.20000
AFIX   0
C11   1    0.706640    0.590096    0.335199    11.00000    0.01402    0.00969 =
         0.01183   -0.00006    0.00141    0.00118
C12   1    0.719144    0.743982    0.299434    11.00000    0.01420    0.01290 =
         0.02083    0.00036   -0.00228   -0.00034
AFIX  43
H12   2    0.703979    0.825338    0.263233    11.00000   -1.20000
AFIX   0
C13   1    0.753708    0.780885    0.315925    11.00000    0.01661    0.01449 =
         0.02622   -0.00197    0.00090   -0.00321
AFIX  43
H13   2    0.762022    0.886747    0.290667    11.00000   -1.20000
AFIX   0
C14   1    0.775975    0.663267    0.369152    11.00000    0.01273    0.02252 =
         0.02385   -0.00461   -0.00142   -0.00137
AFIX  43
H14   2    0.799590    0.687978    0.379804    11.00000   -1.20000
AFIX   0
C15   1    0.763719    0.509335    0.406865    11.00000    0.01554    0.02295 =
         0.02266    0.00254    0.00046    0.00529
AFIX  43
H15   2    0.778926    0.429073    0.444247    11.00000   -1.20000
AFIX   0
C16   1    0.729155    0.472198    0.390035    11.00000    0.01494    0.01747 =
         0.01798    0.00373    0.00292    0.00199
AFIX  43
H16   2    0.720849    0.366584    0.415846    11.00000   -1.20000
AFIX   0
C17   1    0.547639    0.330253    0.454229    11.00000    0.03434    0.08330 =
         0.02411   -0.00767    0.00920   -0.03541
AFIX 137
H17A  2    0.560862    0.227922    0.441852    11.00000   -1.50000
H17B  2    0.532898    0.352666    0.380000    11.00000   -1.50000
H17C  2    0.533614    0.315333    0.525444    11.00000   -1.50000
AFIX   0
C18   1    0.550964    0.708949    0.481493    11.00000    0.02560    0.07131 =
         0.03148   -0.00627    0.00535    0.01934
AFIX 137
H18A  2    0.540825    0.727380    0.397768    11.00000   -1.50000
H18B  2    0.565394    0.804955    0.506098    11.00000   -1.50000
H18C  2    0.532846    0.696928    0.539413    11.00000   -1.50000
AFIX   0
C19   1    0.594727    0.479137    0.646477    11.00000    0.02470    0.05767 =
         0.01625    0.00654    0.00295   -0.01467
AFIX 137
H19A  2    0.607042    0.579871    0.675635    11.00000   -1.50000
H19B  2    0.610289    0.382932    0.649363    11.00000   -1.50000
H19C  2    0.575884    0.457154    0.699736    11.00000   -1.50000
AFIX   0
C20   1    0.669590    0.277412   -0.056833    11.00000    0.03484    0.03786 =
         0.02406   -0.01827    0.01082   -0.00706
AFIX 137
H20A  2    0.652630    0.190416   -0.042579    11.00000   -1.50000
H20B  2    0.687289    0.231196   -0.107226    11.00000   -1.50000
H20C  2    0.658513    0.372422   -0.100309    11.00000   -1.50000
AFIX   0
C21   1    0.709567    0.161546    0.171080    11.00000    0.03157    0.01628 =
         0.04567    0.00417    0.01643    0.00944
AFIX 137
H21A  2    0.727078    0.197245    0.233630    11.00000   -1.50000
H21B  2    0.720032    0.092649    0.108513    11.00000   -1.50000
H21C  2    0.692185    0.095626    0.210741    11.00000   -1.50000
AFIX   0
C22   1    0.724359    0.495579    0.051553    11.00000    0.02980    0.02587 =
         0.02236   -0.00391    0.01342   -0.00862
AFIX 137
H22A  2    0.736709    0.444778   -0.015157    11.00000   -1.50000
H22B  2    0.740105    0.514759    0.123630    11.00000   -1.50000
H22C  2    0.714517    0.602883    0.023259    11.00000   -1.50000
AFIX   0
C23   1    0.558901    0.498637    0.008852    11.00000    0.03499    0.01848 =
         0.03145   -0.00021   -0.01878   -0.00129
AFIX  43
H23   2    0.548591    0.585623   -0.040277    11.00000   -1.20000
AFIX   0
C24   1    0.548726    0.446129    0.125109    11.00000    0.01536    0.02612 =
         0.03845   -0.00991   -0.00588   -0.00170
AFIX  43
H24   2    0.530889    0.493170    0.169595    11.00000   -1.20000
AFIX   0
C25   1    0.570005    0.309902    0.163801    11.00000    0.02011    0.01836 =
         0.01949    0.00045   -0.00033   -0.00885
AFIX  43
H25   2    0.568691    0.248299    0.238560    11.00000   -1.20000
AFIX   0
C26   1    0.593467    0.281738    0.071992    11.00000    0.01886    0.01454 =
         0.01860   -0.00384    0.00000   -0.00434
AFIX  43
H26   2    0.610592    0.197509    0.073803    11.00000   -1.20000
AFIX   0
C27   1    0.586991    0.400540   -0.022683    11.00000    0.03581    0.02104 =
         0.01416    0.00012   -0.00388   -0.00955
AFIX  43
H27   2    0.599355    0.412566   -0.095077    11.00000   -1.20000
AFIX   0
C28   1    0.631834    0.866242    0.204505    11.00000    0.02191    0.01147 =
         0.01729    0.00107   -0.00334   -0.00020
AFIX  43
H28   2    0.647849    0.884476    0.272225    11.00000   -1.20000
AFIX   0
C29   1    0.639628    0.822570    0.083647    11.00000    0.02105    0.01496 =
         0.01926    0.00469    0.00225   -0.00018
AFIX  43
H29   2    0.661782    0.803442    0.055867    11.00000   -1.20000
AFIX   0
C30   1    0.608734    0.812005    0.010413    11.00000    0.02781    0.01429 =
         0.01705    0.00460   -0.00298   -0.00054
AFIX  43
H30   2    0.606484    0.785505   -0.075260    11.00000   -1.20000
AFIX   0
C31   1    0.581871    0.847852    0.087340    11.00000    0.01475    0.01551 =
         0.02202    0.00252   -0.00497    0.00168
AFIX  43
H31   2    0.558331    0.850922    0.062355    11.00000   -1.20000
AFIX   0
C32   1    0.596115    0.878384    0.208053    11.00000    0.02068    0.01295 =
         0.01928    0.00094   -0.00103    0.00245
AFIX  43
H32   2    0.583827    0.902755    0.278990    11.00000   -1.20000
AFIX   0

PART 1
O1A   3    0.448206    0.857849    0.206987    10.50000    0.02279    0.02924 =
         0.03597    0.00244   -0.00922   -0.00769
C33A  1    0.484665    0.846537    0.208448    10.50000    0.02814    0.01443 =
         0.02356    0.00013   -0.00526    0.00257
AFIX  23
H33A  2    0.492042    0.825804    0.123822    10.50000   -1.20000
H33B  2    0.492855    0.752827    0.262390    10.50000   -1.20000
AFIX   0
C34A  1    0.498629    1.006702    0.255988    10.50000    0.02844    0.02676 =
         0.03771   -0.01152   -0.00361   -0.00894
AFIX  23
H34A  2    0.520671    1.031304    0.219972    10.50000   -1.20000
H34B  2    0.502181    1.003004    0.347257    10.50000   -1.20000
AFIX   0
C35A  1    0.472114    1.139906    0.216856    10.50000    0.02321    0.01281 =
         0.02129   -0.00644   -0.00027   -0.00116
AFIX  23
H35A  2    0.473956    1.176677    0.130095    10.50000   -1.20000
H35B  2    0.472965    1.238508    0.272662    10.50000   -1.20000
AFIX   0
C36A  1    0.440203    1.028079    0.233598    10.50000    0.02478    0.02256 =
         0.02012   -0.00007    0.00433   -0.00607
AFIX  23
H36A  2    0.433098    1.037395    0.319648    10.50000   -1.20000
H36B  2    0.421111    1.066631    0.177079    10.50000   -1.20000
AFIX   0

PART 0
PART 2
O1B   3    0.487802    0.893473    0.099837    10.50000    0.03691    0.03612 =
         0.03439   -0.01130   -0.00552    0.00554
C33B  1    0.476298    0.845908    0.218278    10.50000    0.17108    0.03439 =
         0.03427    0.00190   -0.02802   -0.03325
AFIX  23
H33C  2    0.488217    0.744391    0.251027    10.50000   -1.20000
H33D  2    0.451405    0.826347    0.214763    10.50000   -1.20000
AFIX   0
C34B  1    0.486413    1.005618    0.296602    10.50000    0.20785    0.02824 =
         0.03327   -0.00464    0.00131   -0.00082
AFIX  23
H34C  2    0.475108    1.011229    0.375947    10.50000   -1.20000
H34D  2    0.511344    1.019464    0.310762    10.50000   -1.20000
AFIX   0
C35B  1    0.471521    1.119749    0.202728    10.50000    0.07191    0.05696 =
         0.03068    0.01323    0.01767    0.04818
AFIX  23
H35C  2    0.446486    1.105975    0.193776    10.50000   -1.20000
H35D  2    0.476841    1.238014    0.224365    10.50000   -1.20000
AFIX   0
C36B  1    0.487174    1.071669    0.090147    10.50000    0.04890    0.04190 =
         0.02708   -0.01448    0.00618   -0.02737
AFIX  23
H36C  2    0.473351    1.108823    0.015841    10.50000   -1.20000
H36D  2    0.510450    1.118329    0.087381    10.50000   -1.20000
AFIX   0
HKLF 4

REM  SiC4(C6H5)2(Si(CH3)3)2Hf(C5H5)2 *C4H8O in C2
REM R1 =  0.0246 for   14078 Fo > 4sig(Fo)  and  0.0274 for all   14867 data
REM    421 parameters refined using      1 restraints

END

WGHT      0.0175      3.9672

REM Highest difference peak  1.077,  deepest hole -3.114,  1-sigma level  0.097
Q1    1   0.4444  1.0720  0.0919  11.00000  0.05    1.08
Q2    1   0.8310  0.5754  0.4421  11.00000  0.05    1.04
Q3    1   0.6633  1.0660  0.3823  11.00000  0.05    0.88
Q4    1   0.5838  0.6184  0.1739  11.00000  0.05    0.78
Q5    1   0.6112  0.5700  0.1005  11.00000  0.05    0.77
Q6    1   0.5839  0.5228  0.1705  11.00000  0.05    0.77
Q7    1   0.6063  0.6615  0.1575  11.00000  0.05    0.67
Q8    1   0.6278  0.5157  0.1593  11.00000  0.05    0.66
Q9    1   0.6074  0.4800  0.1600  11.00000  0.05    0.65
Q10   1   0.7253  0.5693  0.7787  11.00000  0.05    0.60
Q11   1   0.6271  0.6310  0.1590  11.00000  0.05    0.59
Q12   1   0.8151  0.5042  0.4787  11.00000  0.05    0.58
Q13   1   0.8151  0.5697  0.5409  11.00000  0.05    0.55
Q14   1   0.6227  0.5958  0.2134  11.00000  0.05    0.52
Q15   1   0.5003  0.5705  0.3262  11.00000  0.05    0.51
Q16   1   0.5703  0.5737  0.4536  11.00000  0.05    0.50
Q17   1   0.7148  0.6736  0.3340  11.00000  0.05    0.48
Q18   1   0.6228  0.5442  0.2124  11.00000  0.05    0.48
Q19   1   0.5058  1.0137  0.1299  11.00000  0.05    0.47
Q20   1   0.7726  0.5700  0.3789  11.00000  0.05    0.46
Q21   1   0.5713  0.8173 -0.0175  11.00000  0.05    0.44
Q22   1   0.8091  0.6190  0.4852  11.00000  0.05    0.43
Q23   1   0.6278  0.5827  0.3736  11.00000  0.05    0.41
Q24   1   0.6875  0.5656  0.3143  11.00000  0.05    0.41
Q25   1   0.4464  0.9585  0.1003  11.00000  0.05    0.41
Q26   1   0.5340  0.5685  0.5363  11.00000  0.05    0.41
Q27   1   0.7119  0.4739  0.3411  11.00000  0.05    0.40
Q28   1   0.8144  0.6135  0.5165  11.00000  0.05    0.40
Q29   1   0.6656  0.5064  0.5518  11.00000  0.05    0.39
Q30   1   0.6657  0.1665  0.4143  11.00000  0.05    0.39
Q31   1   0.6659  0.6282  0.5564  11.00000  0.05    0.39
Q32   1   0.5605  0.3840  0.1356  11.00000  0.05    0.38
Q33   1   0.5676  0.5220  0.2207  11.00000  0.05    0.38
Q34   1   0.6201  0.8548  0.7456  11.00000  0.05    0.38
Q35   1   0.6568  0.6156  0.3454  11.00000  0.05    0.37
Q36   1   0.6429  0.6362  0.8373  11.00000  0.05    0.36
Q37   1   0.7213  0.5591  0.3733  11.00000  0.05    0.36
Q38   1   0.6232  0.8384  0.0477  11.00000  0.05    0.36
Q39   1   0.4523  1.0283  0.2608  11.00000  0.05    0.35
Q40   1   0.6365  0.8594  0.1462  11.00000  0.05    0.35
Q41   1   0.6580  0.2480  0.3233  11.00000  0.05    0.35
Q42   1   0.6334  0.8036  0.3778  11.00000  0.05    0.35
Q43   1   0.5613  0.7606  0.1448  11.00000  0.05    0.34
Q44   1   0.6078  0.6018  0.2600  11.00000  0.05    0.34
Q45   1   0.5918  0.8447  0.1457  11.00000  0.05    0.34
Q46   1   0.7397  0.7599  0.2983  11.00000  0.05    0.34
Q47   1   0.5872  0.5612  0.0354  11.00000  0.05    0.34
Q48   1   0.6523  0.8249  0.2935  11.00000  0.05    0.33
Q49   1   0.4336  1.0676  0.2568  11.00000  0.05    0.33
Q50   1   0.6705  0.4226  0.7381  11.00000  0.05    0.33
;
_shelx_res_checksum   79516

_shelx_hkl_file
;
   2   0   0   -0.30    0.06
   2   0   0   -0.43    0.07
   2   0   0   -0.31    0.08
  -2   0   0   -0.41    0.08
   2   0   0   -0.34    0.06
   2   0   0   -0.27    0.05
   2   0   0   -0.26    0.06
  -2   0   0   -0.39    0.05
  -2   0   0   -0.29    0.06
  -4   0   0  555.10   11.95
  -4   0   0  572.48   11.90
   4   0   0  533.24   11.89
   4   0   0  563.68   11.94
  -4   0   0  570.90   11.94
   4   0   0  552.71   11.91
  -4   0   0  572.38   12.06
  -4   0   0  563.20   11.90
   4   0   0  565.59   11.97
   4   0   0  531.67   11.94
  -6   0   0  132.71    3.10
   6   0   0  135.81    3.14
   6   0   0  133.47    3.16
  -6   0   0  137.54    3.34
  -6   0   0  137.35    2.97
   6   0   0  138.88    3.22
  -6   0   0  138.88    3.17
  -6   0   0  136.98    3.20
  -8   0   0   50.51    1.63
  -8   0   0   48.92    1.40
   8   0   0   47.72    1.47
  -8   0   0   49.65    1.34
   8   0   0   46.30    1.35
   8   0   0   47.01    1.39
  -8   0   0   46.21    1.44
  -8   0   0   47.82    1.16
  10   0   0  114.38    3.02
 -10   0   0  119.24    2.65
 -10   0   0  115.20    2.92
 -10   0   0  122.06    2.86
 -10   0   0  113.69    2.94
 -10   0   0  115.91    3.00
 -10   0   0  123.87    3.24
  10   0   0  120.81    2.92
  10   0   0  115.20    2.94
  12   0   0    0.40    0.34
 -12   0   0    0.28    0.33
 -12   0   0    0.31    0.20
  12   0   0    0.98    0.40
 -12   0   0    0.46    0.44
 -12   0   0    0.73    0.40
 -12   0   0    0.31    0.34
 -12   0   0   -0.09    0.48
  12   0   0    0.48    0.34
 -14   0   0  112.26    2.59
 -14   0   0  115.32    3.09
 -14   0   0  109.75    3.26
 -14   0   0  114.62    2.97
 -14   0   0  112.61    2.99
  14   0   0  113.20    2.96
  14   0   0  115.08    3.01
 -14   0   0  110.58    2.85
  14   0   0  108.03    3.09
  16   0   0   35.43    1.51
  16   0   0   39.85    1.43
 -16   0   0   35.72    1.38
 -16   0   0   39.78    1.47
 -16   0   0   39.16    1.56
  16   0   0   38.36    1.45
 -16   0   0   37.47    1.32
 -16   0   0   38.36    1.74
 -16   0   0   37.81    1.05
  18   0   0  144.63    4.16
 -18   0   0  158.17    4.04
 -18   0   0  162.16    4.70
 -18   0   0  153.22    3.86
 -18   0   0  168.77    4.50
 -18   0   0  149.49    3.53
 -18   0   0  163.93    4.19
  18   0   0  157.54    4.01
  18   0   0  149.42    4.05
 -20   0   0   90.39    2.82
 -20   0   0   88.84    2.52
 -20   0   0   92.06    3.09
  20   0   0   87.65    2.65
  20   0   0   90.56    2.88
 -20   0   0   89.58    2.17
  20   0   0   89.22    2.72
 -20   0   0   94.66    2.69
  22   0   0   10.03    1.07
 -22   0   0    8.98    1.09
  22   0   0   10.20    0.92
 -22   0   0    8.42    0.87
  22   0   0   11.34    0.95
 -22   0   0   10.46    0.84
 -22   0   0    8.32    0.93
 -22   0   0    9.19    0.49
  24   0   0  218.44    5.93
  24   0   0  216.56    5.69
 -24   0   0  228.35    5.83
 -24   0   0  224.71    5.61
 -24   0   0  214.09    6.06
 -24   0   0  219.09    4.95
  24   0   0  226.88    5.65
 -24   0   0  230.29    5.44
 -26   0   0    3.13    0.76
  26   0   0    4.10    0.70
 -26   0   0    2.55    0.67
 -26   0   0    3.90    0.35
 -26   0   0    3.03    0.59
 -26   0   0    4.57    0.98
  26   0   0    4.65    0.73
  26   0   0    4.01    0.87
  28   0   0  176.93    4.81
  28   0   0  168.42    4.87
 -28   0   0  183.25    5.38
 -28   0   0  178.95    4.77
 -28   0   0  179.56    4.99
 -28   0   0  175.05    3.98
  28   0   0  180.67    5.20
 -28   0   0  178.19    4.56
  30   0   0    0.69    0.58
  30   0   0    1.03    0.55
 -30   0   0    0.28    0.68
 -30   0   0   -0.53    0.54
 -30   0   0    0.80    0.48
 -30   0   0    1.50    0.62
 -32   0   0  178.23    4.67
  32   0   0  185.98    5.26
  32   0   0  165.52    5.30
 -32   0   0  181.54    5.20
 -32   0   0  180.65    4.93
  32   0   0  175.65    4.98
 -32   0   0  191.78    5.68
  34   0   0   59.32    2.64
 -34   0   0   62.05    2.20
  34   0   0   61.54    2.45
 -34   0   0   66.95    2.46
  34   0   0   61.10    2.77
 -34   0   0   64.84    3.02
 -34   0   0   64.53    2.68
 -36   0   0   97.85    3.04
  36   0   0  103.03    3.87
 -36   0   0   98.60    3.94
 -36   0   0  100.71    3.31
 -36   0   0  100.35    3.61
  36   0   0   97.25    3.36
  36   0   0  106.03    3.68
  38   0   0   75.92    3.16
  38   0   0   78.23    2.94
 -38   0   0   78.00    3.43
 -38   0   0   73.75    2.80
  38   0   0   80.52    3.40
 -38   0   0   78.52    3.15
 -38   0   0   78.11    2.61
  40   0   0    8.04    1.31
  40   0   0    9.12    1.24
  40   0   0    7.48    1.32
 -40   0   0    9.06    1.17
 -42   0   0   39.57    2.01
  42   0   0   41.83    2.34
  42   0   0   38.00    2.43
  42   0   0   38.36    2.10
  44   0   0    1.16    0.89
 -44   0   0    0.53    0.73
  44   0   0    2.25    0.80
  44   0   0    0.75    0.98
  46   0   0   15.39    2.04
  46   0   0   18.34    1.92
  46   0   0   21.13    1.70
 -46   0   0   20.21    1.54
  48   0   0   17.07    1.95
 -48   0   0   14.68    1.46
  48   0   0   14.14    1.90
  48   0   0   14.39    1.64
  50   0   0   25.25    2.38
  50   0   0   23.94    2.19
  50   0   0   23.20    2.50
  52   0   0   19.84    2.51
  52   0   0   18.61    2.10
  54   0   0    5.30    1.42
  54   0   0    5.67    1.48
  56   0   0   19.58    2.32
  56   0   0   18.44    2.39
  58   0   0    2.19    1.42
  58   0   0    3.94    1.33
  60   0   0   26.38    2.90
  60   0   0   31.82    3.05
  62   0   0    4.42    1.59
  62   0   0    5.30    1.79
   1  -1   0  432.00    9.40
   1  -1   0  425.29    9.24
  -1  -1   0  443.64    9.31
  -1  -1   0  433.58    9.37
  -1  -1   0  439.28    9.32
  -1  -1   0  436.21    9.29
   1  -1   0  443.33    9.39
   1  -1   0  432.34    9.26
   1  -1   0  435.22    9.37
  -1   1   0  445.87    9.31
  -1   1   0  425.04    9.31
  -1   1   0  438.40    9.38
   1   1   0  434.37    9.25
  -1   1   0  424.86    9.22
  -1   1   0  436.07    9.21
   1   1   0  436.23    9.29
  -1   1   0  432.14    9.35
  -3  -1   0  344.15    7.36
  -3  -1   0  337.69    7.31
   3  -1   0  348.80    7.24
   3  -1   0  327.41    7.36
   3  -1   0  335.69    7.33
  -3  -1   0  341.03    7.47
   3  -1   0  345.79    7.43
   3   1   0  338.65    7.11
  -3   1   0  340.29    7.28
   3   1   0  320.92    7.15
  -3   1   0  329.87    7.31
  -3   1   0  322.88    7.32
   3   1   0  342.21    7.24
  -3   1   0  345.08    7.29
   5  -1   0  468.52   10.21
  -5  -1   0  455.70   10.08
  -5  -1   0  475.15   10.10
   5  -1   0  477.12   10.16
   5  -1   0  457.41   10.05
  -5  -1   0  481.71   10.23
   5   1   0  464.95    9.92
  -5   1   0  465.60   10.07
  -5   1   0  477.01   10.17
  -5   1   0  458.92   10.18
   5   1   0  460.71   10.09
   5   1   0  462.59    9.98
  -5   1   0  483.60   10.17
   7  -1   0  132.48    2.97
   7  -1   0  137.93    3.25
  -7  -1   0  132.26    3.12
  -7  -1   0  133.16    3.05
  -7  -1   0  129.71    2.91
  -7  -1   0  136.47    3.20
   7  -1   0  132.74    3.20
   7   1   0  129.49    3.00
   7   1   0  130.84    2.93
  -7   1   0  138.56    3.30
  -7   1   0  132.14    3.22
  -7   1   0  134.83    3.21
   7   1   0  129.80    3.14
  -7   1   0  130.79    3.19
  -7   1   0  131.42    3.04
   9  -1   0  121.78    3.04
   9  -1   0  119.52    3.02
  -9  -1   0  119.55    2.79
  -9  -1   0  116.69    2.68
  -9  -1   0  117.13    2.78
  -9  -1   0  120.91    2.93
   9  -1   0  118.92    2.65
   9   1   0  132.77    3.02
  -9   1   0  133.08    3.30
   9   1   0  133.98    3.27
   9   1   0  132.04    3.09
  -9   1   0  127.82    2.93
  -9   1   0  130.32    3.38
   9   1   0  136.80    3.07
  -9   1   0  131.83    3.09
  -9   1   0  133.35    3.33
  -9   1   0  132.53    3.29
 -11  -1   0   83.84    2.12
  11  -1   0   88.89    2.44
 -11  -1   0   86.32    2.25
 -11  -1   0   86.57    2.19
 -11  -1   0   84.70    2.06
  11  -1   0   85.64    2.37
 -11   1   0   77.28    1.80
 -11   1   0   77.91    2.29
 -11   1   0   78.91    2.03
  11   1   0   83.97    2.05
  11   1   0   77.86    2.23
 -11   1   0   78.51    2.37
 -11   1   0   79.33    2.27
  11   1   0   80.42    2.00
 -11   1   0   81.89    2.26
 -13  -1   0  156.33    3.63
 -13  -1   0  147.09    3.76
 -13  -1   0  151.94    3.58
  13  -1   0  154.86    3.98
 -13  -1   0  154.86    3.71
  13  -1   0  158.61    3.93
 -13  -1   0  157.68    3.72
  13   1   0  150.69    3.54
 -13   1   0  143.87    3.84
  13   1   0  147.84    3.52
 -13   1   0  140.06    3.88
  13   1   0  152.56    3.81
 -13   1   0  147.63    3.77
 -13   1   0  149.92    3.80
 -13   1   0  145.62    3.51
 -15  -1   0  198.68    4.75
  15  -1   0  200.51    4.95
 -15  -1   0  202.95    4.80
  15  -1   0  201.55    5.04
 -15  -1   0  196.96    4.67
 -15  -1   0  193.82    4.59
  15   1   0  195.37    4.61
 -15   1   0  187.60    4.55
  15   1   0  195.68    4.60
 -15   1   0  188.60    4.97
 -15   1   0  198.50    4.85
 -15   1   0  199.49    4.90
  15   1   0  192.38    4.88
 -15   1   0  196.30    5.01
 -17  -1   0   50.43    1.55
  17  -1   0   50.43    1.82
 -17  -1   0   49.26    1.69
 -17  -1   0   52.17    1.56
  17  -1   0   49.48    1.90
 -17  -1   0   49.47    1.68
  17   1   0   50.14    1.60
 -17   1   0   50.79    1.88
 -17   1   0   51.22    1.59
 -17   1   0   52.24    1.99
 -17   1   0   49.86    2.01
 -17   1   0   52.21    1.86
  17   1   0   48.03    1.83
  17   1   0   48.59    1.63
 -19  -1   0  221.53    5.19
 -19  -1   0  217.41    5.34
 -19  -1   0  221.24    5.39
 -19  -1   0  216.58    5.14
  19  -1   0  222.22    5.68
  19  -1   0  215.75    5.51
  19   1   0  234.40    5.22
  19   1   0  237.43    6.05
 -19   1   0  234.97    6.02
  19   1   0  241.34    5.79
 -19   1   0  249.52    6.19
 -19   1   0  249.47    6.03
  19   1   0  241.45    5.72
 -19   1   0  232.48    6.25
 -19   1   0  239.89    5.66
  21  -1   0    4.32    0.78
  21  -1   0    4.69    0.70
 -21  -1   0    4.06    0.62
 -21  -1   0    4.95    0.70
 -21  -1   0    5.28    0.61
 -21  -1   0    4.10    0.52
 -21   1   0    4.56    0.62
  21   1   0    5.89    0.65
 -21   1   0    4.53    0.76
 -21   1   0    5.32    0.77
 -21   1   0    3.67    0.76
  21   1   0    5.02    0.64
 -21   1   0    4.04    0.85
  21   1   0    4.15    0.72
 -23  -1   0  142.81    3.62
 -23  -1   0  145.70    4.00
  23  -1   0  140.61    4.23
  23  -1   0  146.53    4.09
 -23  -1   0  147.54    3.80
 -23  -1   0  150.33    3.91
 -23   1   0  144.19    4.08
 -23   1   0  137.82    4.41
  23   1   0  147.22    3.78
  23   1   0  136.74    4.11
 -23   1   0  138.55    3.67
 -23   1   0  139.67    4.20
  23   1   0  139.86    3.85
 -25  -1   0   19.77    1.09
 -25  -1   0   18.49    0.93
  25  -1   0   20.61    1.28
 -25  -1   0   18.96    1.22
 -25  -1   0   19.40    1.14
  25  -1   0   20.21    1.43
  25   1   0   23.04    1.17
  25   1   0   20.32    1.40
 -25   1   0   21.65    1.42
  25   1   0   21.18    1.21
 -25   1   0   19.49    1.63
 -25   1   0   22.39    1.55
 -25   1   0   21.03    1.12
 -27  -1   0  163.57    4.03
 -27  -1   0  172.77    4.31
 -27  -1   0  163.79    4.52
  27  -1   0  162.86    4.61
 -27  -1   0  163.63    4.36
  27  -1   0  154.48    4.78
  27   1   0  155.44    4.20
 -27   1   0  153.60    4.91
  27   1   0  152.40    4.50
 -27   1   0  157.74    4.08
  27   1   0  153.35    4.59
 -27   1   0  153.65    4.67
  27   1   0  149.63    4.29
 -27   1   0  170.09    4.61
  29  -1   0   56.81    2.54
 -29  -1   0   59.94    1.81
 -29  -1   0   57.99    2.26
  29  -1   0   56.80    2.34
 -29  -1   0   60.29    2.06
  29   1   0   57.11    2.52
  29   1   0   63.83    2.23
 -29   1   0   56.50    2.71
  29   1   0   60.63    2.49
 -29   1   0   62.82    2.65
 -29   1   0   60.18    3.35
 -29   1   0   60.69    2.06
  29   1   0   59.61    2.28
 -29   1   0   63.91    2.50
 -31  -1   0   53.78    1.97
 -31  -1   0   53.16    1.68
  31  -1   0   51.40    2.42
 -31  -1   0   50.96    2.16
  31  -1   0   52.86    2.27
  31   1   0   58.34    2.55
  31   1   0   58.87    2.19
 -31   1   0   55.59    2.01
 -31   1   0   57.99    2.84
 -31   1   0   59.12    2.66
  31   1   0   60.96    2.56
 -31   1   0   58.12    2.43
 -33  -1   0  136.92    3.77
  33  -1   0  135.30    4.20
  33  -1   0  129.35    4.41
 -33  -1   0  133.17    3.40
  33  -1   0  134.46    4.18
 -33  -1   0  136.02    4.10
  33   1   0  132.35    3.89
  33   1   0  133.23    4.41
 -33   1   0  130.08    4.36
 -33   1   0  130.96    3.66
  33   1   0  130.38    4.29
 -33   1   0  140.51    4.23
 -33   1   0  128.87    4.59
  35  -1   0   -0.25    0.54
 -35  -1   0   -0.47    0.50
  35  -1   0    1.25    0.71
 -35  -1   0    0.78    0.62
  35  -1   0    1.53    0.70
  35   1   0    0.59    0.73
 -35   1   0    1.42    0.84
 -35   1   0    0.86    0.96
  35   1   0    1.43    0.59
 -35   1   0    0.51    0.53
 -35   1   0    0.75    0.76
  35   1   0    0.40    0.65
 -37  -1   0  102.03    3.07
  37  -1   0   97.61    3.58
  37  -1   0   98.42    3.50
  37  -1   0   97.39    3.88
 -37   1   0   87.51    3.27
  37   1   0   91.60    3.10
 -37   1   0   89.77    2.82
 -37   1   0   87.52    3.54
  37   1   0   90.98    3.52
  37   1   0   91.06    3.63
 -37   1   0  101.11    3.98
 -39  -1   0   29.78    1.51
  39  -1   0   26.58    2.11
  39  -1   0   31.21    1.97
  39  -1   0   29.45    1.90
 -39   1   0   30.85    2.16
  39   1   0   32.79    2.12
  39   1   0   31.00    2.09
 -39   1   0   36.02    2.03
 -39   1   0   29.57    2.32
 -39   1   0   31.12    1.59
  39   1   0   33.04    1.79
  41  -1   0   40.36    2.31
 -41  -1   0   45.97    1.86
  41  -1   0   42.87    2.25
  41  -1   0   40.36    2.56
  41   1   0   43.18    2.13
  41   1   0   46.51    2.57
 -41   1   0   41.11    2.51
  41   1   0   42.18    2.58
 -41   1   0   47.91    2.39
 -41   1   0   47.00    2.88
  43  -1   0   38.95    2.34
 -43  -1   0   43.58    1.81
  43  -1   0   39.67    2.29
  43  -1   0   39.86    2.63
 -43   1   0   47.82    3.00
 -43   1   0   48.26    2.45
  43   1   0   48.40    2.63
  43   1   0   49.24    2.76
  43   1   0   47.97    2.28
  45  -1   0   12.52    1.64
  45  -1   0    9.14    1.39
  45  -1   0   13.91    1.85
  45   1   0   13.72    1.44
  45   1   0   11.64    1.56
 -45   1   0   11.08    1.88
  45   1   0   12.25    1.75
 -45   1   0   12.20    1.51
  47  -1   0   31.47    2.53
  47  -1   0   31.66    2.26
  47  -1   0   33.12    2.22
 -47   1   0   39.85    2.30
  47   1   0   35.83    2.50
 -47   1   0   39.12    2.88
  47   1   0   36.78    2.64
  49  -1   0   -1.46    0.81
  49  -1   0    1.04    0.89
  49  -1   0    1.16    1.04
  49   1   0    2.94    1.20
 -49   1   0    1.52    1.01
  49   1   0    1.26    1.03
  51  -1   0   35.17    2.67
  51  -1   0   33.24    2.43
  51  -1   0   33.56    2.33
  51   1   0   36.60    2.75
 -51   1   0   36.25    2.19
  51   1   0   29.39    2.63
  53  -1   0    0.53    0.99
  53  -1   0    3.03    1.32
  53  -1   0    1.61    1.02
  53   1   0    2.57    1.25
  53   1   0    3.29    1.27
 -53   1   0    5.40    1.19
  55  -1   0   15.62    2.29
  55  -1   0   17.20    2.10
  55   1   0   22.36    2.65
  55   1   0   24.86    2.67
  57  -1   0   15.59    2.06
  57  -1   0   21.53    2.72
  57   1   0   12.43    2.12
  57   1   0   15.96    2.12
  59  -1   0    8.83    1.66
  59  -1   0    8.81    1.86
  59   1   0    4.73    1.68
  59   1   0    8.55    1.82
  61  -1   0   24.95    2.75
  61  -1   0   25.72    2.97
  61   1   0   18.98    2.40
  61   1   0   23.73    2.88
  63  -1   0    1.54    1.29
  63  -1   0    3.89    1.68
  63   1   0   -0.73    1.05
  63   1   0    1.12    1.43
   0  -2   0  192.53    4.47
   0  -2   0  190.71    4.17
   0  -2   0  187.06    4.52
   0  -2   0  193.79    4.33
   0  -2   0  189.86    4.38
   0   2   0  136.11    3.03
   0   2   0  122.49    2.99
   0   2   0  124.64    3.17
   0   2   0  126.14    2.87
   0   2   0  134.11    3.09
   0   2   0  127.94    3.08
   2  -2   0   35.45    1.17
   2  -2   0   38.49    1.26
  -2  -2   0   37.31    1.12
  -2  -2   0   35.64    1.06
   2  -2   0   35.68    0.98
   2  -2   0   34.28    1.19
  -2  -2   0   37.88    1.33
   2  -2   0   36.69    0.90
  -2   2   0   29.20    1.04
   2   2   0   29.67    0.90
   2   2   0   28.44    0.92
  -2   2   0   25.83    0.94
  -2   2   0   28.64    0.95
   2   2   0   28.09    0.84
  -2   2   0   29.42    1.04
  -2   2   0   27.05    1.08
  -2   2   0   27.66    0.72
  -4  -2   0   81.76    2.08
  -4  -2   0   79.61    1.95
   4  -2   0   78.32    1.92
   4  -2   0   78.01    2.12
   4  -2   0   76.60    2.12
   4  -2   0   78.23    2.10
  -4  -2   0   76.93    2.22
   4  -2   0   79.65    1.78
  -4   2   0   55.25    1.57
  -4   2   0   54.94    1.67
  -4   2   0   52.95    1.57
  -4   2   0   54.51    1.66
   4   2   0   55.30    1.43
   4   2   0   56.66    1.39
  -4   2   0   55.24    1.67
   4   2   0   54.65    1.47
  -6  -2   0  189.67    4.32
   6  -2   0  191.52    4.35
   6  -2   0  192.19    4.54
   6  -2   0  188.56    4.41
  -6  -2   0  187.99    4.41
  -6  -2   0  189.35    4.61
  -6   2   0  172.18    4.06
   6   2   0  167.82    3.74
  -6   2   0  171.81    4.17
   6   2   0  168.62    3.96
  -6   2   0  168.47    4.05
  -6   2   0  164.28    4.09
   6   2   0  168.92    3.81
   8  -2   0   76.99    2.22
   8  -2   0   73.24    2.00
  -8  -2   0   82.80    2.31
  -8  -2   0   76.25    2.05
   8  -2   0   79.86    2.10
  -8  -2   0   77.97    2.01
  -8   2   0   66.29    1.98
   8   2   0   70.10    1.94
  -8   2   0   63.47    2.08
   8   2   0   71.28    1.85
  -8   2   0   71.71    2.06
  -8   2   0   68.78    1.99
   8   2   0   69.91    1.63
   8   2   0   68.48    1.71
  -8   2   0   67.03    1.88
  10  -2   0  310.37    6.89
  10  -2   0  302.54    7.21
 -10  -2   0  318.65    6.98
  10  -2   0  312.19    7.11
 -10  -2   0  307.17    7.21
 -10  -2   0  311.77    6.99
  10   2   0  317.22    7.01
  10   2   0  309.11    6.91
 -10   2   0  323.98    7.36
 -10   2   0  319.02    7.40
 -10   2   0  341.04    7.54
 -10   2   0  317.80    7.37
 -10   2   0  310.69    7.15
  10   2   0  311.65    7.20
  10   2   0  317.42    7.31
  12  -2   0   24.26    1.09
 -12  -2   0   25.85    1.05
  12  -2   0   24.75    0.85
  12  -2   0   25.92    1.20
 -12  -2   0   25.42    1.17
 -12  -2   0   25.27    0.97
 -12   2   0   30.75    1.29
  12   2   0   29.76    0.91
  12   2   0   29.88    1.00
  12   2   0   32.50    1.21
 -12   2   0   29.89    1.29
  12   2   0   31.32    1.27
 -12   2   0   30.73    1.10
 -12   2   0   30.01    1.34
 -12   2   0   32.21    1.45
  14  -2   0  232.21    5.60
 -14  -2   0  227.31    5.26
 -14  -2   0  225.08    5.50
  14  -2   0  223.98    5.62
  14  -2   0  227.19    5.07
 -14   2   0  229.80    5.72
  14   2   0  234.85    5.21
  14   2   0  234.28    5.28
  14   2   0  229.01    5.58
  14   2   0  233.15    5.30
 -14   2   0  230.12    5.38
 -14   2   0  234.03    5.69
  14   2   0  231.61    5.67
 -14   2   0  218.53    5.66
 -14   2   0  234.47    5.88
 -16  -2   0   30.71    1.12
 -16  -2   0   30.26    1.05
 -16  -2   0   30.02    1.31
  16  -2   0   31.05    0.91
  16  -2   0   30.80    1.44
  16  -2   0   30.11    1.42
 -16   2   0   29.20    1.15
 -16   2   0   28.85    1.44
  16   2   0   31.17    1.33
  16   2   0   31.25    1.04
 -16   2   0   31.16    1.44
  16   2   0   30.12    1.08
 -16   2   0   29.53    1.43
 -16   2   0   30.06    1.59
  16   2   0   32.28    1.44
 -18  -2   0  344.76    7.68
  18  -2   0  340.76    8.20
 -18  -2   0  333.76    7.52
  18  -2   0  337.43    8.19
 -18  -2   0  324.79    7.30
 -18  -2   0  344.51    7.95
 -18  -2   0  354.22    7.72
 -18   2   0  358.34    8.71
 -18   2   0  346.45    8.05
  18   2   0  364.51    8.02
 -18   2   0  363.92    8.49
 -18   2   0  355.38    8.58
  18   2   0  350.40    7.97
 -18   2   0  329.01    8.43
  18   2   0  358.65    8.42
  18   2   0  360.54    8.49
 -20  -2   0   25.57    1.07
 -20  -2   0   26.38    1.22
 -20  -2   0   24.35    0.77
  20  -2   0   22.40    1.35
  20  -2   0   27.74    1.46
 -20  -2   0   26.20    1.08
 -20   2   0   26.35    1.47
  20   2   0   23.24    1.02
  20   2   0   23.68    1.32
  20   2   0   23.98    1.03
 -20   2   0   21.58    1.06
 -20   2   0   26.15    1.52
 -20   2   0   24.10    1.55
  20   2   0   22.27    1.25
 -20   2   0   25.56    1.42
 -22  -2   0  171.04    4.41
 -22  -2   0  164.88    3.88
  22  -2   0  177.34    4.80
  22  -2   0  173.37    4.82
 -22  -2   0  170.05    4.28
 -22   2   0  184.17    5.20
 -22   2   0  176.75    4.91
  22   2   0  179.17    4.49
  22   2   0  184.72    4.94
  22   2   0  186.66    4.49
 -22   2   0  172.14    4.94
 -22   2   0  173.20    5.07
 -22   2   0  174.40    4.47
  22   2   0  183.59    4.97
 -24  -2   0   82.57    2.51
 -24  -2   0   84.43    2.13
  24  -2   0   88.08    3.05
 -24  -2   0   87.86    2.61
  24  -2   0   79.46    2.88
  24   2   0   80.67    2.52
 -24   2   0   79.18    2.46
  24   2   0   85.04    2.48
  24   2   0   82.30    2.90
 -24   2   0   86.80    3.02
  24   2   0   84.17    2.89
 -24   2   0   82.41    2.90
 -24   2   0   82.07    3.13
 -24   2   0   84.04    3.14
  26  -2   0   36.67    1.92
  26  -2   0   40.52    1.94
 -26  -2   0   39.66    1.60
 -26  -2   0   41.42    1.63
 -26  -2   0   39.36    1.24
 -26   2   0   34.02    1.49
 -26   2   0   39.23    2.01
 -26   2   0   34.73    2.02
  26   2   0   36.82    1.87
 -26   2   0   38.43    2.12
 -26   2   0   39.17    1.90
  26   2   0   36.15    1.13
  26   2   0   38.83    1.90
  26   2   0   38.00    1.50
  26   2   0   35.91    1.56
 -28  -2   0  126.92    3.51
  28  -2   0  130.42    4.02
 -28  -2   0  124.60    3.11
 -28  -2   0  124.10    3.59
  28  -2   0  127.59    4.14
  28   2   0  137.16    4.26
 -28   2   0  133.76    3.75
 -28   2   0  138.33    4.36
  28   2   0  138.56    3.93
 -28   2   0  155.86    4.68
 -28   2   0  131.57    4.58
  28   2   0  130.48    4.20
  28   2   0  141.10    3.79
  28   2   0  137.62    3.16
 -28   2   0  130.57    4.23
 -30  -2   0    5.14    0.79
 -30  -2   0    5.83    0.56
  30  -2   0    7.40    1.14
 -30  -2   0    5.52    0.77
  30  -2   0    7.52    1.11
  30   2   0    5.83    0.77
  30   2   0    4.54    0.94
 -30   2   0    5.54    1.28
  30   2   0    3.83    0.70
 -30   2   0    3.83    0.68
 -30   2   0    4.51    0.89
  30   2   0    6.29    1.05
 -30   2   0    4.69    1.13
 -30   2   0    2.93    0.95
  32  -2   0  113.52    3.96
 -32  -2   0  109.98    3.18
  32  -2   0  109.75    3.74
 -32  -2   0  106.94    2.81
 -32   2   0   98.15    3.97
 -32   2   0  105.59    3.88
 -32   2   0   97.38    3.01
  32   2   0   96.93    3.03
  32   2   0  101.63    3.62
  32   2   0   97.12    3.52
 -32   2   0  100.11    3.64
 -34  -2   0   11.30    0.72
  34  -2   0   11.30    1.41
  34  -2   0   10.81    1.34
  34  -2   0    9.51    1.18
 -34  -2   0   12.28    1.04
 -34   2   0    8.20    1.46
  34   2   0    6.53    1.18
 -34   2   0    7.73    1.38
  34   2   0    8.11    1.18
  34   2   0    9.25    1.00
 -34   2   0    9.01    1.32
 -34   2   0    8.53    0.93
  36  -2   0   17.13    1.80
 -36  -2   0   16.15    1.10
  36  -2   0   15.03    1.55
  36  -2   0   16.48    1.51
 -36  -2   0   14.47    0.79
 -36   2   0    9.91    1.03
  36   2   0   10.11    1.32
  36   2   0   14.81    1.67
  36   2   0   14.73    1.26
 -36   2   0   11.64    1.73
 -36   2   0   12.36    1.64
 -36   2   0   14.16    1.61
  38  -2   0   87.75    3.30
  38  -2   0   85.36    3.59
  38  -2   0   85.89    3.39
 -38   2   0   88.91    3.76
 -38   2   0   82.44    3.82
 -38   2   0   92.59    3.55
  38   2   0   81.85    3.43
  38   2   0   87.95    2.94
 -38   2   0   84.10    3.01
  38   2   0   91.28    3.63
  40  -2   0    1.67    1.00
  40  -2   0    2.09    0.94
  40  -2   0    2.65    0.91
  40   2   0    1.39    0.66
 -40   2   0    0.82    1.06
  40   2   0    1.40    0.88
 -40   2   0    2.58    1.11
  40   2   0    1.52    0.84
 -40   2   0    2.44    1.33
  42  -2   0  102.15    4.24
  42  -2   0  103.64    3.84
  42  -2   0  106.40    3.97
  42   2   0  109.23    4.26
 -42   2   0  114.86    4.75
  42   2   0  108.32    4.29
 -42   2   0  107.05    4.41
 -42   2   0  112.13    4.12
  42   2   0  111.95    4.85
  44  -2   0    7.80    1.40
  44  -2   0    7.18    1.29
  44  -2   0    8.38    1.38
  44   2   0    7.27    1.37
 -44   2   0    5.08    1.42
 -44   2   0    8.65    1.58
 -44   2   0    9.20    1.49
  44   2   0    8.00    1.52
  46  -2   0   48.76    2.63
  46  -2   0   45.25    2.83
  46  -2   0   44.58    2.65
 -46   2   0   53.25    2.77
 -46   2   0   47.15    3.20
  46   2   0   51.84    3.04
  46   2   0   51.93    2.98
  48  -2   0   18.40    2.23
  48  -2   0   19.99    2.07
  48  -2   0   19.28    2.08
  48   2   0   19.53    2.16
 -48   2   0   16.59    1.92
  48   2   0   22.43    2.30
 -48   2   0   14.00    2.15
  50  -2   0   16.50    2.22
  50  -2   0   13.23    1.70
  50  -2   0   12.44    1.75
  50   2   0   14.89    2.07
 -50   2   0   17.32    2.32
 -50   2   0   15.64    1.85
  50   2   0   15.31    2.07
  52  -2   0   20.00    2.11
  52  -2   0   19.91    2.41
  52  -2   0   25.98    2.41
  52   2   0   27.12    2.70
  52   2   0   27.96    2.68
 -52   2   0   26.35    2.36
 -52   2   0   26.39    2.93
  54  -2   0    9.51    1.58
  54  -2   0    7.98    1.75
  54  -2   0    4.50    1.27
  54   2   0    6.47    1.46
 -54   2   0    5.65    1.42
  54   2   0    6.72    1.54
 -54   2   0    9.91    2.07
  56  -2   0   19.59    2.21
  56  -2   0   23.52    2.67
  56  -2   0   20.66    2.33
  56   2   0   22.05    2.60
 -56   2   0   23.31    2.22
  56   2   0   23.62    2.58
  58  -2   0    1.43    1.15
  58  -2   0    1.13    1.10
  58   2   0   -0.50    1.21
  58   2   0    0.77    1.21
  60  -2   0   20.03    2.63
  60  -2   0   19.71    2.31
  60   2   0   21.74    2.69
  60   2   0   20.75    2.58
  62  -2   0    2.43    1.27
  62  -2   0    1.39    1.46
  62   2   0    3.97    1.61
  62   2   0    4.46    1.70
   1  -3   0  278.75    6.67
   1  -3   0  287.29    6.40
  -1  -3   0  277.90    6.56
   1  -3   0  283.61    6.15
   1  -3   0  280.88    6.48
  -1  -3   0  283.40    6.35
   1  -3   0  275.29    6.58
  -1  -3   0  281.44    6.44
  -1   3   0  244.48    5.95
   1   3   0  248.75    5.67
   1   3   0  247.81    5.96
   1   3   0  253.59    5.69
  -1   3   0  244.54    5.72
   1   3   0  254.03    5.78
  -1   3   0  254.29    5.75
   1   3   0  256.71    5.77
  -1   3   0  255.05    5.85
   1   3   0  249.67    5.52
  -1   3   0  250.57    5.46
  -1   3   0  233.48    5.80
  -3  -3   0  125.27    3.37
   3  -3   0  125.51    3.28
   3  -3   0  120.18    3.22
   3  -3   0  119.12    3.14
  -3  -3   0  118.45    3.16
  -3  -3   0  119.83    2.97
   3  -3   0  121.72    2.84
  -3   3   0  123.53    3.18
   3   3   0  130.37    3.12
  -3   3   0  123.42    3.28
   3   3   0  127.07    3.07
   3   3   0  125.74    2.98
  -3   3   0  122.60    2.80
  -3   3   0  129.54    3.19
  -3   3   0  121.38    3.26
  -3   3   0  123.84    3.35
   5  -3   0  377.79    8.21
  -5  -3   0  368.91    8.73
  -5  -3   0  365.87    8.48
  -5  -3   0  370.80    8.28
   5  -3   0  363.37    8.53
   5  -3   0  384.43    8.60
   5  -3   0  382.53    8.55
  -5   3   0  341.76    7.99
  -5   3   0  340.06    7.85
   5   3   0  341.52    7.66
   5   3   0  339.19    7.60
  -5   3   0  362.50    7.88
  -5   3   0  328.56    7.94
  -5   3   0  352.15    8.00
   7  -3   0   23.11    0.90
   7  -3   0   23.91    1.14
   7  -3   0   22.67    1.05
   7  -3   0   23.26    1.11
  -7  -3   0   27.07    1.34
  -7  -3   0   22.70    0.91
  -7  -3   0   23.19    1.05
   7   3   0   23.07    0.81
  -7   3   0   21.80    1.15
   7   3   0   24.18    0.95
   7   3   0   22.38    0.85
  -7   3   0   20.88    1.17
  -7   3   0   23.57    1.09
  -7   3   0   22.75    1.08
  -9  -3   0  265.96    6.48
  -9  -3   0  265.19    6.02
   9  -3   0  261.10    6.14
  -9  -3   0  266.35    6.17
   9  -3   0  258.43    6.06
   9  -3   0  260.40    6.34
   9   3   0  230.13    5.50
   9   3   0  236.26    5.21
  -9   3   0  236.93    5.83
   9   3   0  232.44    5.28
   9   3   0  231.96    5.36
  -9   3   0  236.67    5.67
  -9   3   0  232.24    5.75
  -9   3   0  225.06    5.65
  11  -3   0   68.68    2.21
  11  -3   0   62.13    1.94
 -11  -3   0   70.67    2.32
 -11  -3   0   66.53    1.98
  11  -3   0   64.02    1.91
 -11  -3   0   66.20    1.90
 -11  -3   0   60.18    1.65
  11   3   0   70.02    2.01
  11   3   0   67.27    1.78
 -11   3   0   71.63    2.43
 -11   3   0   70.14    2.25
 -11   3   0   69.91    2.26
 -11   3   0   69.33    2.30
  11   3   0   74.81    2.18
 -11   3   0   71.09    2.12
  11   3   0   70.03    1.87
  13  -3   0   85.99    2.35
 -13  -3   0   84.04    2.12
 -13  -3   0   87.79    2.42
  13  -3   0   87.37    2.53
 -13  -3   0   94.18    2.82
  13  -3   0   82.62    2.69
 -13  -3   0   87.82    2.46
  13   3   0   97.53    2.42
 -13   3   0  100.76    2.97
 -13   3   0  102.14    2.77
  13   3   0   98.39    2.51
 -13   3   0   98.81    3.02
  13   3   0  103.68    2.77
 -13   3   0   97.19    3.12
 -13   3   0   97.90    2.95
  13   3   0  101.68    2.88
  15  -3   0  125.50    3.69
  15  -3   0  132.62    3.55
 -15  -3   0  129.16    3.34
  15  -3   0  127.61    3.20
 -15  -3   0  130.20    3.38
 -15  -3   0  125.07    3.01
 -15  -3   0  128.95    3.68
  15   3   0  111.79    3.10
  15   3   0  116.84    3.25
 -15   3   0  108.07    3.33
  15   3   0  113.35    2.82
 -15   3   0  112.07    3.50
  15   3   0  109.05    2.72
 -15   3   0  111.02    3.03
 -15   3   0  114.86    3.33
 -15   3   0  110.79    3.33
 -17  -3   0   22.22    0.81
 -17  -3   0   23.56    1.08
  17  -3   0   21.52    1.35
 -17  -3   0   23.51    1.29
  17  -3   0   23.05    0.91
  17  -3   0   23.54    1.27
 -17   3   0   25.69    1.56
 -17   3   0   26.32    1.45
 -17   3   0   24.37    1.40
  17   3   0   25.24    0.92
  17   3   0   25.62    1.35
 -17   3   0   25.40    1.40
  17   3   0   24.44    1.21
  17   3   0   23.27    0.97
 -17   3   0   25.15    1.16
  17   3   0   25.17    0.98
  19  -3   0  173.25    4.61
 -19  -3   0  167.06    4.54
 -19  -3   0  158.97    3.91
  19  -3   0  169.66    3.96
  19  -3   0  168.04    4.70
 -19  -3   0  165.33    4.18
  19   3   0  163.28    3.91
  19   3   0  158.09    3.94
 -19   3   0  161.46    4.51
  19   3   0  153.48    4.41
 -19   3   0  157.88    4.71
 -19   3   0  154.23    4.07
  19   3   0  160.99    3.85
  19   3   0  161.02    4.32
 -19   3   0  157.67    4.53
 -19   3   0  162.32    4.51
 -21  -3   0   37.67    1.46
  21  -3   0   39.13    1.83
  21  -3   0   40.53    1.89
 -21  -3   0   39.58    1.76
  21   3   0   38.77    1.83
  21   3   0   37.30    1.67
  21   3   0   38.18    1.32
 -21   3   0   36.17    1.81
 -21   3   0   38.82    1.86
 -21   3   0   35.40    1.82
  21   3   0   40.39    1.39
 -21   3   0   38.26    1.51
 -21   3   0   40.87    2.11
  23  -3   0  120.92    3.84
 -23  -3   0  123.28    3.35
  23  -3   0  127.01    3.98
 -23  -3   0  125.68    3.68
 -23   3   0  125.53    4.02
 -23   3   0  124.04    4.04
  23   3   0  129.75    3.97
  23   3   0  132.52    3.39
  23   3   0  128.45    3.36
  23   3   0  130.57    3.86
 -23   3   0  127.14    4.26
 -23   3   0  126.12    3.50
 -23   3   0  131.79    4.00
 -25  -3   0   25.25    1.43
  25  -3   0   23.80    1.63
  25  -3   0   25.06    1.63
 -25  -3   0   24.14    1.19
 -25   3   0   24.72    1.62
  25   3   0   29.29    1.63
 -25   3   0   28.49    1.95
 -25   3   0   26.35    1.31
  25   3   0   26.02    1.52
 -25   3   0   26.87    1.74
  25   3   0   26.08    1.19
 -25   3   0   26.66    1.69
  25   3   0   26.88    1.22
  27  -3   0   63.49    2.73
 -27  -3   0   69.11    2.48
  27  -3   0   62.39    2.66
  27   3   0   62.09    2.13
 -27   3   0   58.97    2.15
  27   3   0   67.12    2.10
  27   3   0   61.57    2.60
 -27   3   0   63.38    2.97
  27   3   0   66.66    2.57
 -27   3   0   60.72    2.64
 -27   3   0   67.02    2.82
 -27   3   0   58.29    2.71
 -29  -3   0  132.17    3.91
  29  -3   0  128.54    4.28
  29  -3   0  133.80    4.38
 -29   3   0  129.86    3.75
  29   3   0  140.76    4.27
 -29   3   0  137.13    4.71
 -29   3   0  133.80    4.62
  29   3   0  134.71    3.66
 -29   3   0  134.46    4.46
  29   3   0  129.58    3.77
 -29   3   0  133.78    4.36
  29   3   0  128.43    4.28
 -31  -3   0   48.41    2.06
  31  -3   0   43.94    2.34
  31  -3   0   48.91    2.41
 -31   3   0   45.32    2.43
  31   3   0   50.34    2.02
 -31   3   0   53.15    2.87
  31   3   0   49.60    2.42
 -31   3   0   46.56    2.69
  31   3   0   49.46    2.34
  31   3   0   49.56    1.85
 -31   3   0   46.09    1.96
  33  -3   0  116.07    4.11
 -33  -3   0  116.61    3.60
  33  -3   0  118.36    4.22
  33   3   0   99.01    3.74
  33   3   0   98.76    3.06
 -33   3   0  108.58    3.99
 -33   3   0  100.59    3.19
  33   3   0  100.88    3.68
 -33   3   0  107.25    4.21
 -33   3   0  105.26    4.27
  35  -3   0    6.00    1.20
  35  -3   0    6.64    1.00
  35  -3   0    6.26    1.23
 -35  -3   0    6.08    0.97
 -35   3   0    4.27    1.28
  35   3   0    6.32    0.83
  35   3   0    4.17    0.97
 -35   3   0    4.16    1.21
  35   3   0    5.13    1.04
 -35   3   0    5.77    1.39
 -35   3   0    5.74    0.89
  37  -3   0   53.09    2.36
 -37  -3   0   49.72    2.13
  37  -3   0   51.99    2.65
  37  -3   0   46.74    2.69
 -37   3   0   43.70    2.02
 -37   3   0   45.87    2.88
  37   3   0   47.92    2.52
 -37   3   0   46.99    2.67
  37   3   0   43.83    2.02
 -37   3   0   46.44    3.05
  37   3   0   46.24    2.55
  39  -3   0   20.29    2.01
 -39  -3   0   20.23    1.80
  39  -3   0   18.10    1.97
  39  -3   0   22.85    1.64
 -39   3   0   16.25    1.94
 -39   3   0   13.96    1.94
  39   3   0   15.41    1.69
 -39   3   0   22.59    2.54
  39   3   0   16.30    1.83
  41  -3   0   26.89    2.11
  41  -3   0   27.01    2.45
  41  -3   0   26.46    1.82
 -41   3   0   23.35    2.55
  41   3   0   26.21    2.08
 -41   3   0   29.78    2.29
 -41   3   0   26.21    2.51
  41   3   0   28.06    2.42
  43  -3   0   52.25    2.59
  43  -3   0   51.99    2.82
  43  -3   0   46.67    2.82
  43   3   0   40.02    2.54
 -43   3   0   41.89    2.68
 -43   3   0   44.80    2.96
 -43   3   0   42.62    3.01
  43   3   0   44.10    2.65
  45  -3   0    5.99    1.21
  45  -3   0    7.63    1.48
  45  -3   0    7.71    1.59
  45   3   0    5.83    1.31
 -45   3   0    5.53    1.60
 -45   3   0    7.63    1.63
  45   3   0    9.15    1.57
 -45   3   0    7.34    1.59
  47  -3   0   34.46    2.57
  47  -3   0   34.84    2.42
  47  -3   0   33.03    2.20
 -47   3   0   38.44    3.00
 -47   3   0   41.34    3.18
 -47   3   0   41.37    2.69
  47   3   0   36.60    2.65
  47   3   0   38.06    2.70
  49  -3   0   -0.78    0.98
  49  -3   0    1.92    0.93
  49  -3   0    0.48    0.94
  49   3   0    0.63    1.01
  49   3   0    1.90    1.23
 -49   3   0    1.20    1.18
 -49   3   0   -0.68    1.28
  51  -3   0   37.17    2.61
  51  -3   0   36.45    2.87
  51  -3   0   38.20    2.44
 -51   3   0   35.92    2.69
  51   3   0   34.99    2.74
 -51   3   0   37.38    3.14
  51   3   0   37.15    2.75
  53  -3   0    0.07    0.91
  53  -3   0    1.25    1.16
  53  -3   0    0.04    1.03
 -53   3   0    4.05    1.47
  53   3   0    4.46    1.53
 -53   3   0    2.95    1.64
  53   3   0    3.16    1.28
  55  -3   0   15.76    2.24
  55  -3   0   18.72    2.24
  55  -3   0   15.68    1.94
  55   3   0   21.93    2.62
 -55   3   0   24.83    2.98
  55   3   0   19.23    2.38
 -55   3   0   18.35    2.23
  57  -3   0    6.66    1.61
  57  -3   0    9.79    1.65
  57  -3   0    9.67    1.91
 -57   3   0   10.88    1.87
  57   3   0   19.90    2.53
 -57   3   0   12.25    2.35
  57   3   0   11.48    2.07
  59  -3   0   10.98    2.16
  59  -3   0   11.53    2.09
  59  -3   0   13.72    2.38
  59   3   0   12.70    2.18
 -59   3   0    9.75    2.31
 -59   3   0   12.18    1.91
  59   3   0   14.90    2.25
  61  -3   0   14.26    2.37
  61   3   0   13.72    2.13
  61   3   0   12.63    2.18
   0  -4   0  501.05   11.66
   0  -4   0  515.69   11.84
   0  -4   0  508.18   11.50
   0  -4   0  523.24   11.39
   0   4   0  508.15   11.60
   0   4   0  512.69   11.70
   0   4   0  513.11   11.60
   0   4   0  530.45   11.96
   0   4   0  548.87   11.78
   0   4   0  517.13   11.27
   2  -4   0   17.55    1.01
  -2  -4   0   17.22    1.25
  -2  -4   0   17.62    0.98
   2  -4   0   16.78    0.67
   2  -4   0   17.64    1.12
   2  -4   0   14.15    1.00
  -2  -4   0   19.13    1.11
  -2  -4   0   15.75    0.88
   2  -4   0   17.60    0.95
  -2   4   0   14.86    0.58
   2   4   0   13.86    0.64
  -2   4   0   15.85    1.01
   2   4   0   15.47    0.82
  -2   4   0   14.38    0.94
  -2   4   0   17.91    0.95
   2   4   0   13.40    1.09
  -2   4   0   15.47    1.12
   2   4   0   15.49    0.83
   2   4   0   14.74    0.85
  -2   4   0   17.13    0.91
   2   4   0   15.40    0.92
   4  -4   0  347.12    7.62
   4  -4   0  336.45    8.07
   4  -4   0  345.22    8.23
  -4  -4   0  349.56    8.13
  -4  -4   0  348.01    7.82
   4  -4   0  344.78    7.93
   4  -4   0  344.00    8.20
  -4  -4   0  340.74    8.36
  -4   4   0  339.59    8.26
  -4   4   0  354.10    8.07
   4   4   0  350.04    7.83
  -4   4   0  351.09    8.05
  -4   4   0  340.65    8.16
   4   4   0  350.50    7.89
  -4   4   0  349.74    7.50
   4   4   0  329.35    7.80
  -4   4   0  342.78    8.19
   4   4   0  350.63    7.75
   4   4   0  360.64    7.97
   4   4   0  339.89    8.26
   6  -4   0  100.50    2.52
  -6  -4   0   98.06    2.88
   6  -4   0   96.92    2.90
  -6  -4   0   98.40    2.64
  -6  -4   0   95.49    3.11
   6  -4   0   98.77    2.93
   6  -4   0  102.43    3.01
  -6   4   0   70.32    2.41
   6   4   0   71.02    2.01
   6   4   0   72.09    2.02
  -6   4   0   66.62    2.24
  -6   4   0   75.91    2.44
  -6   4   0   73.30    2.28
   8  -4   0   95.89    2.91
  -8  -4   0   94.56    2.80
   8  -4   0   98.53    2.98
  -8  -4   0   96.06    2.57
   8  -4   0   93.84    2.51
  -8  -4   0   95.70    3.14
   8  -4   0   94.13    2.83
   8   4   0   86.95    2.44
  -8   4   0   89.52    2.84
  -8   4   0   88.26    2.69
  -8   4   0   88.66    2.87
   8   4   0   91.20    2.36
  -8   4   0   87.41    2.67
 -10  -4   0  147.06    3.97
  10  -4   0  152.15    4.18
 -10  -4   0  156.48    4.40
  10  -4   0  149.83    3.76
  10  -4   0  148.97    4.14
  10  -4   0  151.12    4.00
 -10  -4   0  148.74    3.77
  10   4   0  152.92    3.77
  10   4   0  153.63    3.77
 -10   4   0  153.09    4.21
  10   4   0  159.80    3.98
 -10   4   0  157.43    4.34
  10   4   0  156.75    3.72
 -10   4   0  151.06    4.37
 -10   4   0  155.32    4.20
 -12  -4   0   23.01    1.17
  12  -4   0   20.99    1.09
 -12  -4   0   22.71    1.49
 -12  -4   0   22.83    1.06
  12  -4   0   23.16    1.33
  12  -4   0   22.46    1.28
  12  -4   0   21.73    1.05
  12   4   0   26.06    1.02
  12   4   0   25.69    0.96
  12   4   0   30.03    1.27
  12   4   0   26.40    1.10
 -12   4   0   27.35    1.57
 -12   4   0   29.97    1.36
 -12   4   0   28.64    1.43
 -12   4   0   25.05    1.40
 -12   4   0   27.98    1.51
 -14  -4   0  152.10    4.03
 -14  -4   0  151.37    4.42
  14  -4   0  155.35    4.37
  14  -4   0  150.83    3.96
 -14  -4   0  151.45    3.90
  14  -4   0  150.54    3.99
  14  -4   0  154.65    4.31
  14   4   0  158.13    3.95
 -14   4   0  151.68    4.31
  14   4   0  155.47    4.12
 -14   4   0  152.83    4.39
 -14   4   0  153.58    4.09
 -14   4   0  153.25    4.51
  14   4   0  149.69    3.73
  14   4   0  154.90    3.67
 -14   4   0  147.65    4.27
  16  -4   0    1.97    0.47
 -16  -4   0    1.30    0.66
  16  -4   0    3.22    0.72
 -16  -4   0    3.10    0.56
  16  -4   0    2.13    0.54
 -16  -4   0    2.16    0.54
 -16   4   0    3.65    0.75
  16   4   0    3.26    0.63
  16   4   0    2.85    0.52
 -16   4   0    3.69    0.64
 -16   4   0    2.57    0.68
  16   4   0    3.86    0.47
 -16   4   0    2.77    0.83
  16   4   0    3.09    0.40
 -16   4   0    3.23    0.77
  18  -4   0   72.88    2.69
 -18  -4   0   69.49    2.29
  18  -4   0   68.98    2.15
 -18  -4   0   73.47    2.72
  18  -4   0   69.75    2.41
 -18  -4   0   72.25    2.29
 -18   4   0   48.67    1.85
 -18   4   0   51.56    2.18
  18   4   0   46.69    1.81
 -18   4   0   44.59    2.09
  18   4   0   52.36    2.03
 -18   4   0   48.49    2.10
 -18   4   0   49.84    2.35
  18   4   0   49.73    1.51
  18   4   0   48.62    1.57
  20  -4   0   52.58    2.12
  20  -4   0   52.88    2.33
  20  -4   0   56.12    1.77
 -20  -4   0   55.70    1.96
 -20  -4   0   52.02    2.25
  20   4   0   59.08    1.83
 -20   4   0   60.84    2.14
  20   4   0   59.40    1.78
  20   4   0   61.94    2.17
 -20   4   0   65.73    2.56
  20   4   0   58.15    2.32
 -20   4   0   59.59    2.70
 -20   4   0   59.56    2.44
  20   4   0   57.85    1.83
 -20   4   0   60.12    2.53
  22  -4   0   50.12    2.32
  22  -4   0   50.65    1.62
 -22  -4   0   47.99    1.83
  22  -4   0   48.01    2.08
 -22  -4   0   46.78    2.11
 -22   4   0   39.62    2.11
 -22   4   0   40.47    1.73
  22   4   0   39.06    1.47
  22   4   0   42.36    1.81
 -22   4   0   39.70    2.28
 -22   4   0   44.55    2.16
  22   4   0   42.34    1.45
 -22   4   0   40.39    2.04
  22   4   0   41.85    1.48
  22   4   0   41.93    1.99
 -24  -4   0  119.88    3.43
  24  -4   0  121.65    3.87
  24  -4   0  118.15    4.01
  24  -4   0  121.76    3.09
 -24  -4   0  119.46    3.84
 -24   4   0  124.39    4.41
 -24   4   0  127.60    4.21
 -24   4   0  130.29    3.64
  24   4   0  120.15    3.28
  24   4   0  125.25    3.32
  24   4   0  118.60    3.76
 -24   4   0  126.12    4.10
  24   4   0  127.95    4.03
 -24   4   0  123.83    4.13
  26  -4   0    5.38    1.12
  26  -4   0    2.98    0.85
 -26  -4   0    3.93    0.70
 -26  -4   0    4.67    1.01
  26   4   0    1.85    0.45
  26   4   0    1.84    0.49
 -26   4   0    2.05    1.00
 -26   4   0    1.49    0.79
  26   4   0    1.02    0.58
 -26   4   0    0.84    0.76
 -26   4   0    1.44    0.90
 -26   4   0    0.86    0.55
  26   4   0    0.87    0.68
  28  -4   0  192.36    5.73
 -28  -4   0  181.78    4.83
  28  -4   0  181.04    5.49
 -28  -4   0  181.81    5.26
 -28   4   0  168.23    5.63
  28   4   0  177.18    4.42
  28   4   0  170.38    4.99
 -28   4   0  175.74    5.49
 -28   4   0  170.20    4.66
  28   4   0  172.45    4.48
 -28   4   0  164.60    5.24
  28   4   0  173.84    5.20
 -28   4   0  165.20    5.30
  30  -4   0   18.46    1.86
 -30  -4   0   16.18    1.15
  30  -4   0   12.02    1.45
 -30  -4   0   14.48    1.47
 -30   4   0   12.38    1.69
  30   4   0   14.38    1.04
 -30   4   0   15.73    1.76
 -30   4   0   14.40    1.58
 -30   4   0   15.37    1.20
 -30   4   0   12.03    1.60
  30   4   0   12.31    0.95
  30   4   0   16.27    1.48
  30   4   0   13.35    1.55
  32  -4   0  153.45    4.99
  32  -4   0  143.36    4.92
 -32  -4   0  149.20    4.52
  32  -4   0  147.30    4.28
  32   4   0  144.36    4.53
 -32   4   0  136.94    5.00
 -32   4   0  137.31    4.87
 -32   4   0  139.34    4.09
 -32   4   0  142.59    5.19
  32   4   0  138.11    4.69
  32   4   0  142.82    3.88
  34  -4   0   38.95    2.37
  34  -4   0   37.14    1.88
  34  -4   0   39.81    2.41
 -34  -4   0   39.05    2.12
  34   4   0   32.16    2.02
 -34   4   0   34.51    2.42
 -34   4   0   39.09    2.65
 -34   4   0   37.79    1.84
 -34   4   0   36.32    2.70
  34   4   0   35.25    2.16
  36  -4   0   73.26    3.33
 -36  -4   0   73.65    2.90
  36  -4   0   74.89    2.80
  36  -4   0   66.98    3.25
 -36   4   0   67.58    2.63
  36   4   0   68.70    3.13
 -36   4   0   71.03    3.44
 -36   4   0   73.99    3.68
  36   4   0   69.81    3.04
 -36   4   0   70.68    3.65
 -38  -4   0   32.55    1.95
  38  -4   0   36.36    2.38
  38  -4   0   34.39    2.29
  38  -4   0   32.66    1.87
 -38   4   0   34.21    2.74
 -38   4   0   30.39    2.47
 -38   4   0   32.36    2.99
  38   4   0   33.76    2.34
  38   4   0   33.33    2.17
  40  -4   0   17.18    1.93
  40  -4   0   21.78    1.62
 -40  -4   0   20.76    1.66
  40  -4   0   25.02    2.32
  40  -4   0   21.30    1.66
  40   4   0   23.09    2.10
  40   4   0   24.97    2.37
 -40   4   0   21.81    2.60
 -40   4   0   18.57    2.26
 -40   4   0   16.66    2.05
  42  -4   0   25.97    1.80
  42  -4   0   26.47    2.43
  42  -4   0   25.75    2.39
  42  -4   0   25.73    1.80
 -42   4   0   25.32    2.71
 -42   4   0   25.66    2.49
  42   4   0   24.73    2.03
 -42   4   0   25.37    2.87
  42   4   0   22.90    2.30
  44  -4   0    4.12    0.98
  44  -4   0    3.10    1.14
  44  -4   0    1.87    1.10
  44   4   0    2.77    1.21
 -44   4   0    1.42    1.47
 -44   4   0    2.38    1.31
 -44   4   0    5.04    1.69
  44   4   0    2.63    1.10
  46  -4   0   26.57    1.94
  46  -4   0   25.84    2.46
  46  -4   0   26.19    2.64
  46   4   0   20.78    2.29
 -46   4   0   24.18    2.53
 -46   4   0   26.45    3.09
 -46   4   0   21.52    2.54
  46   4   0   26.56    2.46
  48  -4   0   18.36    2.29
  48  -4   0   17.88    2.22
  48  -4   0   19.59    1.91
 -48   4   0   19.82    2.38
  48   4   0   17.74    2.08
  48   4   0   22.30    2.46
 -48   4   0   22.15    2.71
 -48   4   0   23.83    2.94
  50  -4   0   15.02    2.52
  50  -4   0   15.23    2.09
  50  -4   0   12.71    2.03
  50   4   0   19.30    2.24
 -50   4   0   19.22    2.73
  50   4   0   16.65    2.22
 -50   4   0   17.94    2.28
  52  -4   0   20.44    2.57
  52  -4   0   18.68    2.25
 -52   4   0   22.11    2.99
  52   4   0   25.43    2.60
 -52   4   0   25.98    2.66
  52   4   0   24.44    2.59
  54  -4   0    1.04    1.16
  54  -4   0    0.68    1.23
  54   4   0   -0.05    1.23
 -54   4   0    2.32    1.66
 -54   4   0    1.06    1.36
  54   4   0    1.98    1.19
  56  -4   0   26.04    2.79
  56  -4   0   23.17    2.74
 -56   4   0   27.61    3.24
 -56   4   0   21.20    2.49
  56   4   0   17.06    2.27
  56   4   0   25.94    2.91
  58  -4   0    3.17    1.40
  58  -4   0    3.33    1.46
 -58   4   0    3.18    1.86
 -58   4   0    1.73    1.53
  58   4   0    2.29    1.39
  58   4   0    1.70    1.53
  60  -4   0   22.73    2.81
  60  -4   0   23.56    2.66
 -60   4   0   17.79    2.33
  60   4   0   20.76    2.61
  60   4   0   14.19    2.32
 -60   4   0   16.82    2.76
  -1  -5   0   62.64    2.13
   1  -5   0   59.33    2.11
  -1  -5   0   61.43    1.97
   1  -5   0   59.51    1.98
  -1  -5   0   66.17    2.32
   1  -5   0   56.69    2.32
   1  -5   0   61.09    2.29
  -1  -5   0   57.37    2.37
   1   5   0   48.44    2.03
   1   5   0   46.06    1.82
   1   5   0   48.33    1.72
  -1   5   0   49.04    1.75
  -1   5   0   50.11    1.34
  -1   5   0   47.21    2.00
   1   5   0   47.46    1.38
   1   5   0   44.88    1.73
  -1   5   0   47.62    1.88
  -1   5   0   48.84    1.76
   1   5   0   47.43    1.72
  -1   5   0   42.89    1.74
   3  -5   0   58.31    2.23
  -3  -5   0   60.06    2.24
  -3  -5   0   60.13    1.93
  -3  -5   0   59.28    2.44
   3  -5   0   60.23    2.14
   3  -5   0   57.96    2.33
   3  -5   0   60.94    2.02
  -3   5   0   57.48    2.00
  -3   5   0   52.69    2.03
  -3   5   0   57.00    1.46
   3   5   0   60.75    1.89
  -3   5   0   54.39    2.18
   3   5   0   58.20    1.65
  -3   5   0   52.48    2.09
   3   5   0   56.81    2.00
   3   5   0   56.07    1.91
   3   5   0   57.08    2.26
  -3   5   0   55.91    1.99
   3   5   0   57.72    1.88
   5  -5   0   84.34    2.19
   5  -5   0   82.31    2.85
  -5  -5   0   82.66    2.75
   5  -5   0   82.64    2.55
  -5  -5   0   84.67    2.45
   5  -5   0   80.31    2.69
  -5  -5   0   86.55    3.06
   5  -5   0   87.06    2.88
  -5   5   0   74.41    2.63
  -5   5   0   77.16    2.78
   5   5   0   83.02    2.38
  -5   5   0   85.70    2.63
   5   5   0   83.28    2.85
  -5   5   0   83.52    2.78
   5   5   0   83.77    2.50
   5   5   0   83.23    2.25
   5   5   0   76.12    2.38
  -5   5   0   81.84    1.93
  -5   5   0   84.38    2.64
   5   5   0   81.12    2.36
   7  -5   0    6.61    0.93
  -7  -5   0    6.43    0.88
   7  -5   0    4.82    0.76
  -7  -5   0    5.04    0.62
   7  -5   0    5.02    0.78
   7  -5   0    5.01    0.51
  -7  -5   0    5.55    0.99
  -7   5   0    4.66    0.80
   7   5   0    5.98    0.90
  -7   5   0    4.19    0.72
  -7   5   0    2.81    0.70
   7   5   0    6.68    0.64
   7   5   0    6.87    0.63
   7   5   0    5.14    0.59
   7   5   0    5.35    0.65
  -7   5   0    6.27    0.82
   7   5   0    5.21    0.58
  -9  -5   0  211.88    5.49
   9  -5   0  209.83    5.54
   9  -5   0  206.46    5.01
   9  -5   0  212.82    5.59
   9  -5   0  210.63    5.68
  -9  -5   0  211.76    5.88
  -9  -5   0  209.45    5.14
   9   5   0  207.70    5.05
  -9   5   0  206.68    5.47
  -9   5   0  207.84    5.50
  -9   5   0  209.32    5.67
   9   5   0  207.72    4.88
  -9   5   0  212.74    5.72
   9   5   0  214.68    5.14
   9   5   0  207.05    5.13
 -11  -5   0   27.42    1.25
  11  -5   0   28.53    1.61
 -11  -5   0   28.11    1.47
  11  -5   0   28.97    1.46
 -11  -5   0   27.82    1.73
  11  -5   0   27.04    1.56
  11  -5   0   27.70    1.18
  11   5   0   26.68    1.12
 -11   5   0   26.93    1.70
 -11   5   0   30.71    1.60
  11   5   0   29.63    1.13
 -11   5   0   30.51    1.71
 -11   5   0   27.85    1.50
  11   5   0   31.43    1.32
  13  -5   0  151.78    4.58
 -13  -5   0  164.35    4.43
  13  -5   0  161.95    4.68
  13  -5   0  161.17    4.15
 -13  -5   0  162.58    4.88
 -13  -5   0  162.61    4.16
  13  -5   0  159.32    4.38
 -13   5   0  164.78    4.56
 -13   5   0  172.21    4.71
  13   5   0  165.54    4.37
 -13   5   0  168.47    4.72
  13   5   0  161.95    4.35
  13   5   0  164.17    4.08
  13   5   0  165.83    4.15
 -13   5   0  168.68    4.85
 -13   5   0  155.50    4.87
  15  -5   0   53.11    1.90
  15  -5   0   51.33    2.24
  15  -5   0   54.61    2.00
  15  -5   0   49.64    2.21
 -15  -5   0   50.92    1.86
 -15  -5   0   53.76    2.06
 -15  -5   0   56.72    2.46
 -15   5   0   58.79    2.62
  15   5   0   59.63    1.87
 -15   5   0   62.67    2.46
  15   5   0   57.17    1.81
 -15   5   0   59.52    2.25
 -15   5   0   61.45    2.55
 -15   5   0   59.42    2.39
  15   5   0   61.72    1.99
  15   5   0   61.30    2.19
  17  -5   0   25.44    1.64
 -17  -5   0   25.74    1.43
  17  -5   0   23.16    1.51
  17  -5   0   23.99    1.27
 -17  -5   0   25.06    1.26
 -17  -5   0   23.62    1.63
  17  -5   0   22.88    1.26
  17   5   0   26.58    1.07
  17   5   0   27.00    1.46
 -17   5   0   24.50    1.63
  17   5   0   27.78    1.30
 -17   5   0   26.32    1.65
  17   5   0   25.71    1.21
 -17   5   0   27.93    1.88
 -17   5   0   24.27    1.42
 -17   5   0   25.88    1.59
 -19  -5   0  109.85    3.40
 -19  -5   0  114.90    3.89
  19  -5   0  115.06    3.45
  19  -5   0  117.41    3.81
  19  -5   0  112.27    3.84
  19  -5   0  116.45    3.31
 -19  -5   0  111.48    3.29
 -19   5   0  127.01    4.30
 -19   5   0  116.00    3.90
  19   5   0  120.57    3.16
  19   5   0  122.74    3.50
 -19   5   0  117.81    4.04
  19   5   0  124.14    3.73
 -19   5   0  120.81    3.99
 -19   5   0  121.85    3.64
  21  -5   0    1.11    0.60
 -21  -5   0    1.03    0.61
 -21  -5   0    0.52    0.81
  21  -5   0    0.68    0.68
  21  -5   0    0.43    0.45
 -21  -5   0    1.65    0.60
  21  -5   0    1.45    0.77
 -21   5   0    0.55    0.61
  21   5   0    0.65    0.35
 -21   5   0    1.42    0.93
 -21   5   0    0.19    0.67
 -21   5   0    0.60    0.79
 -21   5   0    0.29    0.76
  21   5   0    0.31    0.48
  21   5   0    0.79    0.58
  23  -5   0  120.91    3.99
 -23  -5   0  116.93    3.53
  23  -5   0  117.85    3.29
  23  -5   0  110.28    3.68
 -23  -5   0  115.97    3.97
  23  -5   0  121.47    4.14
  23   5   0  111.91    3.08
  23   5   0  117.91    3.13
 -23   5   0  121.46    4.08
  23   5   0  114.21    3.52
 -23   5   0  114.94    3.96
  23   5   0  113.35    3.76
 -23   5   0  103.57    3.91
 -23   5   0  113.87    3.51
 -23   5   0  115.09    4.31
  25  -5   0   25.20    1.91
  25  -5   0   29.11    1.83
 -25  -5   0   22.42    1.69
  25  -5   0   26.88    1.25
  25  -5   0   25.78    1.66
 -25  -5   0   23.13    1.43
  25   5   0   24.39    1.16
  25   5   0   22.38    1.44
 -25   5   0   23.70    1.89
  25   5   0   22.44    1.13
 -25   5   0   22.59    1.86
 -25   5   0   26.83    2.20
 -25   5   0   27.12    1.92
 -25   5   0   20.12    1.40
  25   5   0   23.69    1.69
  27  -5   0  115.00    3.94
  27  -5   0  105.92    3.91
 -27  -5   0  117.32    3.54
 -27  -5   0  118.70    4.05
  27  -5   0  119.52    4.29
 -27   5   0  110.35    3.41
  27   5   0  105.66    2.95
  27   5   0   99.43    3.67
 -27   5   0  105.40    3.90
 -27   5   0  103.11    4.23
  27   5   0   99.87    2.97
 -27   5   0  105.60    4.01
  27   5   0  103.44    3.44
 -27   5   0   98.28    3.88
 -29  -5   0   67.55    2.51
 -29  -5   0   67.64    2.93
  29  -5   0   68.34    2.91
  29  -5   0   72.46    3.27
  29  -5   0   65.38    2.31
  29  -5   0   69.40    2.96
  29   5   0   68.32    2.31
 -29   5   0   68.13    3.23
  29   5   0   66.47    2.68
 -29   5   0   70.21    3.15
 -29   5   0   74.91    2.69
  29   5   0   66.78    2.96
 -29   5   0   70.49    3.31
 -29   5   0   73.96    3.55
  31  -5   0   21.66    1.91
 -31  -5   0   19.90    1.37
 -31  -5   0   23.29    1.78
  31  -5   0   19.66    1.26
  31  -5   0   22.86    2.02
  31  -5   0   21.76    2.15
  31   5   0   23.60    1.58
 -31   5   0   17.73    1.93
 -31   5   0   17.15    1.91
 -31   5   0   25.08    2.58
 -31   5   0   22.19    1.49
  31   5   0   17.91    1.76
  33  -5   0   63.12    3.22
 -33  -5   0   70.17    3.04
  33  -5   0   63.67    3.07
  33  -5   0   66.30    2.44
 -33  -5   0   67.77    2.50
  33  -5   0   66.83    2.92
 -33   5   0   59.19    3.43
  33   5   0   61.87    2.97
 -33   5   0   61.18    3.26
 -33   5   0   61.34    2.46
 -33   5   0   58.37    3.19
  33   5   0   55.39    2.59
  35  -5   0    3.40    1.11
  35  -5   0    0.18    0.83
  35  -5   0    2.32    1.06
 -35  -5   0    2.98    1.09
  35  -5   0    2.42    0.66
  35   5   0    3.36    1.03
 -35   5   0    1.40    0.75
  35   5   0    1.80    0.84
 -35   5   0    2.85    1.34
 -35   5   0    1.46    1.22
 -35   5   0    1.25    1.14
  37  -5   0   72.80    3.13
  37  -5   0   75.90    3.78
 -37  -5   0   74.84    3.15
  37  -5   0   77.32    3.63
  37  -5   0   78.59    3.58
 -37   5   0   67.07    3.72
  37   5   0   69.96    3.10
 -37   5   0   67.04    3.54
 -37   5   0   80.26    4.06
  37   5   0   69.13    3.31
  39  -5   0    1.98    0.90
  39  -5   0    2.25    1.18
  39  -5   0    1.09    0.97
 -39  -5   0    2.84    1.11
 -39   5   0    1.96    1.36
 -39   5   0    3.22    1.48
  39   5   0    5.00    1.13
 -39   5   0    4.54    1.57
  39   5   0    2.76    1.15
  41  -5   0   25.23    1.88
 -41  -5   0   28.63    2.03
  41  -5   0   28.88    2.66
  41  -5   0   29.55    2.76
  41   5   0   35.60    2.30
  41   5   0   38.53    2.62
 -41   5   0   33.40    3.14
 -41   5   0   33.13    3.05
 -41   5   0   31.90    3.21
  43  -5   0   19.34    2.26
  43  -5   0   19.41    1.87
  43  -5   0   20.71    2.44
 -43   5   0   18.40    2.34
 -43   5   0   21.93    2.77
  43   5   0   19.79    2.31
  43   5   0   20.66    2.05
 -43   5   0   19.31    2.70
  45  -5   0    5.64    1.49
  45  -5   0    6.89    1.56
 -45   5   0    5.77    1.71
 -45   5   0    5.89    2.00
  45   5   0    6.84    1.44
 -45   5   0    5.01    1.69
  45   5   0    5.42    1.41
  47  -5   0   52.98    3.32
  47  -5   0   54.45    3.31
  47   5   0   60.20    3.48
  47   5   0   57.66    3.15
 -47   5   0   61.17    3.64
 -47   5   0   50.88    3.73
 -47   5   0   56.03    4.03
  49  -5   0   -0.81    0.97
  49  -5   0    0.44    1.13
 -49   5   0    1.86    1.61
 -49   5   0   -0.55    1.40
  49   5   0   -0.03    0.92
  49   5   0    0.63    1.24
 -49   5   0    0.49    1.44
  51  -5   0   32.60    2.99
  51  -5   0   37.48    2.99
 -51   5   0   29.28    3.45
 -51   5   0   28.21    2.93
 -51   5   0   36.16    3.68
  51   5   0   30.82    2.98
  51   5   0   36.15    2.72
  53  -5   0    7.23    1.76
  53  -5   0    2.48    1.24
  53   5   0    5.66    1.49
  53   5   0    3.99    1.45
 -53   5   0    6.27    1.90
 -53   5   0    6.88    2.25
  55  -5   0   12.31    2.25
  55  -5   0   15.53    2.23
  55   5   0   21.21    2.68
 -55   5   0   10.40    2.46
  55   5   0   16.30    2.27
 -55   5   0   15.72    2.31
  57  -5   0   11.50    2.15
  57  -5   0   12.13    2.09
 -57   5   0   10.94    2.60
  57   5   0   12.49    2.28
 -57   5   0   14.29    2.36
  57   5   0   13.96    2.09
   0  -6   0   68.85    2.32
   0  -6   0   71.85    2.73
   0  -6   0   72.73    2.91
   0   6   0   41.97    2.01
   0   6   0   39.66    1.71
   0   6   0   37.56    1.71
   0   6   0   42.34    1.88
   0   6   0   39.09    1.69
   0   6   0   38.93    1.22
  -2  -6   0   11.50    1.19
   2  -6   0   11.63    1.01
   2  -6   0   12.07    1.16
  -2  -6   0   10.51    1.31
   2  -6   0   10.69    1.21
   2  -6   0   13.81    1.48
  -2  -6   0   11.65    0.93
  -2   6   0   10.75    1.24
   2   6   0   10.79    1.27
  -2   6   0    8.67    0.91
   2   6   0   11.81    1.02
  -2   6   0    9.32    0.97
   2   6   0   12.18    1.17
  -2   6   0   11.10    0.54
   2   6   0    9.42    0.91
  -2   6   0    9.40    1.02
   2   6   0    9.62    0.92
   2   6   0    9.36    0.61
  -2   6   0    9.87    1.10
   4  -6   0   99.05    3.42
  -4  -6   0   94.42    3.54
  -4  -6   0   98.92    3.29
   4  -6   0   97.99    3.35
  -4  -6   0   96.45    2.87
   4  -6   0   96.43    3.15
   4  -6   0   96.35    2.98
   4   6   0   82.01    2.79
   4   6   0   89.04    2.37
   4   6   0   90.44    2.75
  -4   6   0   85.34    2.86
   4   6   0   85.38    2.67
  -4   6   0   83.22    3.09
  -4   6   0   88.90    2.06
   4   6   0   85.92    2.66
   4   6   0   87.88    3.18
  -4   6   0   78.08    2.86
  -4   6   0   88.85    2.87
  -4   6   0   89.41    3.08
   6  -6   0   47.81    2.16
   6  -6   0   45.17    1.44
   6  -6   0   49.09    2.07
  -6  -6   0   47.09    2.07
  -6  -6   0   46.70    1.76
   6  -6   0   45.78    2.19
   6  -6   0   43.89    1.87
  -6  -6   0   46.75    2.34
  -6   6   0   46.35    1.97
  -6   6   0   47.53    2.19
   6   6   0   46.57    1.87
   6   6   0   47.36    1.57
   6   6   0   41.94    1.70
   6   6   0   43.77    1.73
   6   6   0   43.98    1.74
   6   6   0   47.61    2.21
  -6   6   0   46.62    1.99
  -6   6   0   49.30    2.29
   8  -6   0   45.77    2.15
  -8  -6   0   47.61    1.78
   8  -6   0   46.39    2.18
  -8  -6   0   49.99    2.44
   8  -6   0   49.40    1.97
   8  -6   0   47.08    1.54
  -8  -6   0   51.55    2.17
   8  -6   0   46.49    2.11
  -8   6   0   48.47    2.29
  -8   6   0   53.67    2.23
  -8   6   0   52.93    2.40
   8   6   0   53.78    1.80
  -8   6   0   60.44    2.28
   8   6   0   52.88    2.39
   8   6   0   50.73    1.53
   8   6   0   53.73    1.89
   8   6   0   53.73    1.90
   8   6   0   53.14    1.86
   8   6   0   54.34    2.00
  10  -6   0  140.75    4.28
 -10  -6   0  146.25    4.27
  10  -6   0  138.66    4.41
  10  -6   0  142.38    4.32
 -10  -6   0  144.12    4.69
 -10  -6   0  137.51    3.80
  10  -6   0  142.20    3.63
 -10   6   0  138.10    4.11
  10   6   0  131.21    3.57
 -10   6   0  131.66    4.04
  10   6   0  126.21    4.19
  10   6   0  131.24    3.32
  10   6   0  135.07    3.58
 -10   6   0  132.50    4.31
  10   6   0  131.39    3.59
 -10   6   0  134.79    4.30
  10   6   0  132.48    3.60
  10   6   0  135.11    3.70
  12  -6   0    4.67    0.61
  12  -6   0    4.16    0.90
  12  -6   0    4.70    0.86
 -12  -6   0    4.80    0.71
 -12  -6   0    6.03    0.96
 -12  -6   0    4.03    1.07
  12  -6   0    4.84    0.98
 -12   6   0    3.97    0.91
 -12   6   0    2.39    0.79
  12   6   0    4.82    0.68
 -12   6   0    6.01    1.10
 -12   6   0    3.51    0.88
  12   6   0    5.40    0.60
 -12   6   0    4.49    0.86
  12   6   0    4.85    0.60
  12   6   0    4.79    0.68
 -14  -6   0  165.44    5.20
  14  -6   0  159.17    4.25
  14  -6   0  161.64    4.98
 -14  -6   0  165.63    4.72
  14  -6   0  161.67    4.66
 -14  -6   0  163.57    4.33
  14  -6   0  161.51    4.91
  14   6   0  169.55    4.34
 -14   6   0  165.20    4.91
 -14   6   0  165.39    4.92
 -14   6   0  165.77    5.05
  14   6   0  169.24    4.49
  14   6   0  163.54    4.24
  14   6   0  159.01    4.18
 -14   6   0  166.88    4.80
 -14   6   0  165.74    5.20
 -16  -6   0   16.57    1.76
  16  -6   0   12.92    1.42
  16  -6   0   14.92    1.02
  16  -6   0   15.21    1.56
  16  -6   0   15.48    1.27
 -16  -6   0   15.01    1.37
 -16  -6   0   14.01    1.07
 -16   6   0   19.36    1.43
 -16   6   0   17.08    1.73
 -16   6   0   13.38    1.45
 -16   6   0   20.85    1.62
 -16   6   0   14.22    1.45
  16   6   0   16.95    1.17
  16   6   0   17.60    1.04
  16   6   0   18.26    1.00
 -18  -6   0  129.27    3.67
  18  -6   0  124.02    3.81
  18  -6   0  133.92    4.36
  18  -6   0  126.60    4.30
  18  -6   0  123.73    3.68
 -18  -6   0  127.36    3.96
 -18  -6   0  130.11    4.50
 -18   6   0  132.86    4.33
 -18   6   0  125.35    4.36
  18   6   0  127.39    3.92
 -18   6   0  132.68    4.08
 -18   6   0  134.39    4.67
  18   6   0  134.88    3.69
 -18   6   0  135.40    4.38
  18   6   0  130.86    3.51
  20  -6   0   47.01    2.47
 -20  -6   0   49.97    1.98
  20  -6   0   47.16    2.01
  20  -6   0   42.11    2.35
 -20  -6   0   47.32    2.13
 -20  -6   0   47.79    2.59
  20  -6   0   49.64    2.05
 -20   6   0   52.88    2.81
  20   6   0   47.97    1.74
 -20   6   0   47.36    2.14
 -20   6   0   51.59    2.53
 -20   6   0   51.30    2.62
  20   6   0   48.56    2.13
 -20   6   0   48.32    2.44
  20   6   0   50.64    1.95
  22  -6   0   53.66    2.75
  22  -6   0   56.27    2.33
  22  -6   0   58.61    2.75
 -22  -6   0   60.50    2.29
 -22  -6   0   61.55    2.46
  22  -6   0   58.59    2.24
 -22  -6   0   60.91    2.91
  22   6   0   62.74    2.07
 -22   6   0   64.88    2.91
 -22   6   0   58.47    2.82
 -22   6   0   63.35    3.25
 -22   6   0   63.40    2.58
  22   6   0   65.34    2.61
 -22   6   0   64.56    2.95
  22   6   0   65.87    2.34
 -24  -6   0   47.02    2.60
 -24  -6   0   43.17    2.08
  24  -6   0   43.50    2.46
  24  -6   0   45.44    2.14
  24  -6   0   48.50    1.95
  24  -6   0   45.63    2.46
  24   6   0   40.60    2.07
 -24   6   0   37.12    1.95
 -24   6   0   35.25    2.55
 -24   6   0   32.79    2.17
 -24   6   0   37.74    2.29
 -24   6   0   36.25    2.27
  24   6   0   39.52    1.81
  24   6   0   37.37    1.52
  26  -6   0    5.84    1.23
 -26  -6   0    4.44    1.11
 -26  -6   0    6.14    1.00
  26  -6   0    5.62    1.17
  26  -6   0    4.88    0.97
 -26   6   0    3.72    0.93
 -26   6   0    2.98    1.05
  26   6   0    2.76    0.89
  26   6   0    3.05    0.74
  26   6   0    3.31    0.65
 -26   6   0    5.40    1.45
 -26   6   0    1.86    0.95
 -26   6   0    1.70    1.08
  28  -6   0   63.74    2.73
  28  -6   0   59.52    3.10
 -28  -6   0   60.24    2.89
  28  -6   0   59.88    2.91
 -28  -6   0   59.43    2.46
 -28   6   0   66.77    3.25
 -28   6   0   62.55    3.07
 -28   6   0   55.66    3.30
  28   6   0   57.19    2.76
 -28   6   0   61.72    2.59
  28   6   0   58.32    2.44
 -28   6   0   65.38    3.19
  30  -6   0    0.16    0.75
 -30  -6   0    0.99    1.01
  30  -6   0    0.77    0.87
 -30  -6   0    2.06    0.77
  30  -6   0    0.65    0.97
  30   6   0    1.12    0.67
 -30   6   0    0.70    1.15
 -30   6   0    3.02    1.24
  30   6   0    1.88    0.89
 -30   6   0    1.79    1.09
 -30   6   0    1.75    0.80
 -30   6   0    1.26    1.05
  32  -6   0   39.18    2.58
  32  -6   0   38.03    2.29
 -32  -6   0   39.41    1.99
  32  -6   0   33.25    2.24
 -32  -6   0   38.70    2.45
 -32   6   0   33.93    2.84
  32   6   0   38.87    2.06
 -32   6   0   34.35    2.62
  32   6   0   37.62    2.32
 -32   6   0   34.70    1.96
 -32   6   0   35.56    2.63
  34  -6   0   13.61    1.71
 -34  -6   0   16.70    1.88
  34  -6   0   11.95    1.80
  34  -6   0   17.73    1.88
 -34   6   0   14.88    1.49
 -34   6   0   10.63    1.97
  34   6   0   13.69    1.50
 -34   6   0   11.34    1.79
 -34   6   0   10.05    1.82
  34   6   0   12.53    1.67
  36  -6   0   11.28    1.58
  36  -6   0   13.10    1.79
 -36  -6   0   10.81    1.63
  36  -6   0   14.65    2.08
 -36   6   0    9.23    2.06
 -36   6   0    7.43    1.70
  36   6   0    6.26    1.40
  36   6   0    9.76    1.31
 -36   6   0    4.23    1.34
 -38  -6   0   29.30    2.31
  38  -6   0   28.29    2.13
  38  -6   0   28.66    2.67
  38  -6   0   30.80    2.39
  38   6   0   18.24    2.08
  38   6   0   23.53    1.85
 -38   6   0   21.55    2.64
 -38   6   0   21.52    2.46
 -38   6   0   23.56    2.62
  40  -6   0    4.31    1.34
  40  -6   0    3.40    1.16
  40  -6   0    3.87    1.46
 -40  -6   0    2.64    1.22
 -40   6   0    2.14    1.60
 -40   6   0    0.24    1.30
  40   6   0    2.21    0.96
 -40   6   0    3.37    1.65
  40   6   0    2.96    1.20
  42  -6   0   42.21    2.89
  42  -6   0   47.12    2.71
  42  -6   0   42.43    3.03
 -42  -6   0   45.24    2.70
  42   6   0   48.78    2.68
  42   6   0   46.83    3.01
 -42   6   0   46.92    3.30
 -42   6   0   45.55    3.51
 -42   6   0   49.50    3.70
  44  -6   0    6.41    1.62
  44  -6   0    7.19    1.67
  44  -6   0   10.43    2.04
 -44   6   0    7.12    1.85
 -44   6   0    8.53    2.05
  44   6   0    2.91    1.29
  44   6   0    3.95    1.17
 -44   6   0    7.45    2.13
  46  -6   0   46.00    3.24
  46  -6   0   39.52    3.02
 -46   6   0   45.48    3.76
  46   6   0   42.76    3.00
 -46   6   0   38.73    3.23
 -46   6   0   34.57    3.41
  46   6   0   38.46    2.68
  48  -6   0   13.83    2.27
  48  -6   0    9.46    1.85
 -48   6   0    6.00    1.88
  48   6   0   14.47    2.20
 -48   6   0   11.72    2.42
 -48   6   0    9.64    2.39
  50  -6   0   14.18    2.20
  50  -6   0   14.37    2.20
 -50   6   0   13.04    2.76
 -50   6   0    9.07    2.19
 -50   6   0   15.37    2.46
  50   6   0   17.23    2.38
  52  -6   0   24.85    2.83
  52  -6   0   22.11    2.68
 -52   6   0   29.05    3.43
 -52   6   0   26.21    3.05
 -52   6   0   25.40    3.45
  52   6   0   22.51    2.65
  54  -6   0    2.44    1.48
  54  -6   0    4.65    1.68
  54   6   0    4.24    1.75
 -54   6   0    8.75    2.54
 -54   6   0    2.99    1.77
 -56   6   0   22.38    3.37
   1  -7   0   79.03    3.13
  -1  -7   0   77.77    3.09
  -1  -7   0   86.38    2.77
  -1  -7   0   79.83    3.33
   1  -7   0   87.28    2.81
   1  -7   0   87.40    3.41
  -1   7   0   87.26    3.00
  -1   7   0   92.81    3.06
   1   7   0   90.51    2.98
  -1   7   0   89.88    3.22
   1   7   0   90.40    2.96
   1   7   0   86.41    2.35
   1   7   0   84.72    3.12
   1   7   0   81.83    3.29
  -1   7   0   91.80    3.45
  -3  -7   0   13.96    1.15
   3  -7   0   15.55    1.64
   3  -7   0   14.29    1.35
  -3  -7   0   14.32    1.44
   3  -7   0   15.37    1.66
  -3  -7   0   14.75    1.68
   3  -7   0   15.10    1.28
   3   7   0   19.05    1.29
   3   7   0   16.26    1.58
   3   7   0   18.80    1.23
   3   7   0   19.27    1.41
  -3   7   0   19.05    1.58
   3   7   0   18.51    0.89
  -3   7   0   15.53    1.59
  -3   7   0   18.46    1.35
  -3   7   0   15.21    1.37
  -5  -7   0  105.79    4.05
   5  -7   0  112.68    3.90
   5  -7   0  114.90    3.47
  -5  -7   0  112.39    3.29
  -5  -7   0  108.59    3.78
   5  -7   0  104.10    3.81
   5  -7   0  109.07    3.68
  -5   7   0   98.81    3.35
   5   7   0   98.48    3.24
   5   7   0   89.81    3.50
  -5   7   0  101.14    3.34
   5   7   0   98.44    3.09
   5   7   0   98.30    2.68
  -5   7   0   98.66    3.67
  -5   7   0   91.94    3.51
   5   7   0   98.07    3.08
  -7  -7   0    1.71    0.61
   7  -7   0    1.66    0.83
  -7  -7   0    1.66    0.95
  -7  -7   0    1.92    0.80
   7  -7   0    1.69    0.70
   7  -7   0    1.45    0.86
   7  -7   0    2.20    0.78
   7   7   0    2.05    0.48
  -7   7   0    1.50    0.72
   7   7   0    1.45    0.61
   7   7   0    1.90    0.66
  -7   7   0    1.05    0.76
   7   7   0    1.06    0.54
  -7   7   0    2.37    0.81
   7   7   0    2.32    0.92
  -7   7   0    1.34    0.81
   9  -7   0  103.89    3.39
   9  -7   0  102.90    2.78
  -9  -7   0  105.80    3.14
   9  -7   0  100.65    3.60
   9  -7   0  103.96    3.70
  -9  -7   0  110.46    4.11
  -9  -7   0  100.13    3.60
   9  -7   0  101.07    3.73
   9   7   0  103.67    3.01
   9   7   0  111.13    3.22
  -9   7   0  107.03    3.91
  -9   7   0  100.26    3.57
  -9   7   0  104.72    3.62
   9   7   0  107.98    3.90
   9   7   0  102.79    3.18
  -9   7   0   99.87    3.80
   9   7   0  108.14    3.34
  11  -7   0   24.31    1.72
 -11  -7   0   22.82    1.59
  11  -7   0   25.96    1.74
  11  -7   0   22.80    1.81
 -11  -7   0   24.25    2.31
 -11  -7   0   22.95    1.31
  11  -7   0   24.71    1.12
  11  -7   0   23.23    1.52
 -11   7   0   21.38    1.98
 -11   7   0   17.80    1.62
  11   7   0   18.45    1.17
 -11   7   0   17.75    1.64
  11   7   0   15.71    1.04
  11   7   0   14.10    1.16
  11   7   0   14.57    1.08
 -11   7   0   12.26    1.46
 -11   7   0   19.29    1.49
  11   7   0   17.53    1.87
 -13  -7   0   47.87    1.91
  13  -7   0   48.16    2.30
 -13  -7   0   48.80    2.78
  13  -7   0   50.32    2.44
  13  -7   0   43.09    2.13
  13  -7   0   49.50    2.54
  13  -7   0   46.04    1.70
 -13  -7   0   45.45    2.27
  13   7   0   38.69    1.70
  13   7   0   41.79    1.81
  13   7   0   42.77    1.77
  13   7   0   42.74    2.39
 -13   7   0   41.52    2.23
 -13   7   0   41.88    2.20
 -13   7   0   37.97    2.33
 -13   7   0   43.05    2.45
 -13   7   0   39.61    2.14
  15  -7   0   88.08    3.23
 -15  -7   0   85.04    3.19
  15  -7   0   87.12    3.42
  15  -7   0   83.73    3.43
  15  -7   0   85.70    2.65
 -15  -7   0   85.69    3.67
 -15  -7   0   85.43    2.79
  15   7   0   82.59    2.70
 -15   7   0   83.12    3.28
 -15   7   0   75.77    3.49
 -15   7   0   83.75    3.33
 -15   7   0   86.36    3.21
  15   7   0   82.65    2.77
 -15   7   0   79.37    3.35
  17  -7   0   15.28    1.70
  17  -7   0   14.39    1.71
 -17  -7   0   16.36    1.31
 -17  -7   0   18.39    2.06
  17  -7   0   16.42    1.54
 -17  -7   0   16.65    1.57
  17  -7   0   14.63    1.06
 -17   7   0   12.23    1.54
  17   7   0   13.44    1.24
 -17   7   0   15.97    1.71
 -17   7   0   13.72    1.46
 -17   7   0   12.94    1.53
 -17   7   0   13.56    1.77
  17   7   0   15.08    1.10
  19  -7   0  103.72    3.95
  19  -7   0   99.45    3.18
 -19  -7   0   99.25    4.06
  19  -7   0   99.82    3.92
 -19  -7   0  104.30    3.25
 -19  -7   0  102.32    3.59
  19  -7   0  106.64    3.57
 -19   7   0  106.47    3.96
 -19   7   0  103.02    4.09
 -19   7   0  110.14    4.04
  19   7   0  105.48    3.19
 -19   7   0  109.03    4.33
 -19   7   0  101.53    3.67
  19   7   0  109.67    3.50
 -21  -7   0    5.05    1.26
 -21  -7   0    4.94    1.00
  21  -7   0    6.83    1.06
 -21  -7   0    4.64    0.86
  21  -7   0    5.13    0.85
  21  -7   0    5.00    1.14
  21  -7   0    3.69    1.05
  21   7   0    5.32    0.94
 -21   7   0    5.56    1.30
 -21   7   0    2.25    1.22
 -21   7   0    6.53    1.17
 -21   7   0    3.30    1.16
 -21   7   0    5.74    1.20
  23  -7   0   45.56    2.14
 -23  -7   0   52.51    2.43
  23  -7   0   51.37    2.82
 -23  -7   0   53.02    2.95
  23  -7   0   46.91    2.14
 -23  -7   0   47.31    2.10
  23  -7   0   50.64    2.76
 -23   7   0   45.20    2.32
 -23   7   0   46.51    2.70
 -23   7   0   44.03    2.67
 -23   7   0   48.52    3.04
  23   7   0   50.00    2.30
 -23   7   0   44.08    2.72
 -25  -7   0   12.59    1.40
  25  -7   0   11.27    1.60
  25  -7   0   10.69    1.23
  25  -7   0   11.51    1.70
 -25  -7   0    9.37    1.72
 -25   7   0   14.81    2.04
 -25   7   0   16.14    1.61
 -25   7   0   18.22    2.00
 -25   7   0   14.55    1.76
  25   7   0   19.10    1.73
 -25   7   0   15.62    1.85
 -27  -7   0   13.46    1.46
  27  -7   0   12.61    1.74
  27  -7   0   13.11    1.85
  27  -7   0   11.48    1.37
 -27  -7   0   10.40    1.78
 -27   7   0    8.70    1.53
 -27   7   0   12.46    1.48
 -27   7   0   11.56    1.98
  27   7   0   14.87    1.62
 -27   7   0    9.77    1.69
 -27   7   0   10.14    1.71
  29  -7   0   59.27    2.68
 -29  -7   0   57.36    2.57
  29  -7   0   55.06    3.04
 -29  -7   0   55.05    3.01
  29  -7   0   54.65    3.16
 -29   7   0   54.04    3.08
 -29   7   0   50.90    2.99
  29   7   0   54.65    2.74
 -29   7   0   56.09    3.19
 -29   7   0   55.74    2.64
 -29   7   0   55.66    3.44
  31  -7   0   17.13    1.75
  31  -7   0   17.66    2.05
  31  -7   0   22.57    2.48
 -31  -7   0   16.40    2.01
 -31  -7   0   19.69    1.75
  31   7   0   17.27    1.88
 -31   7   0   18.02    1.70
 -31   7   0   13.52    1.98
 -31   7   0   17.01    2.16
 -31   7   0   13.65    2.13
  33  -7   0   39.83    2.45
  33  -7   0   33.11    2.95
 -33  -7   0   39.77    2.72
  33  -7   0   43.71    2.67
 -33   7   0   37.52    2.18
 -33   7   0   33.08    2.79
  33   7   0   39.09    2.52
 -33   7   0   34.63    2.82
 -33   7   0   37.02    3.12
 -35  -7   0    0.50    1.21
  35  -7   0    0.98    1.20
  35  -7   0    0.77    0.97
  35  -7   0   -1.13    0.73
  35   7   0    0.01    0.94
 -35   7   0    1.65    1.51
 -35   7   0    2.20    1.46
 -35   7   0    0.75    1.36
  37  -7   0   38.05    2.57
 -37  -7   0   33.11    2.56
  37  -7   0   37.64    2.53
  37  -7   0   30.02    2.95
  37   7   0   27.65    2.55
 -37   7   0   27.72    3.02
 -37   7   0   29.50    2.94
 -37   7   0   36.34    3.34
  39  -7   0    9.65    1.70
  39  -7   0    9.90    1.71
  39  -7   0   12.45    2.11
 -39  -7   0    8.64    1.75
  39   7   0    9.23    1.72
 -39   7   0    7.46    1.94
 -39   7   0   10.87    2.13
 -39   7   0    7.13    2.07
  41  -7   0   16.37    2.03
  41  -7   0   14.67    2.23
  41  -7   0   16.70    2.18
 -41  -7   0   17.30    2.12
 -41   7   0   15.44    2.43
 -41   7   0   20.91    2.65
 -41   7   0   15.05    2.37
  41   7   0   14.95    2.03
  43  -7   0   16.00    2.34
  43  -7   0   22.38    2.46
 -43  -7   0   24.96    2.42
  43  -7   0   24.22    2.38
  43   7   0   15.22    2.11
 -43   7   0   18.11    2.76
 -43   7   0   17.68    2.78
 -43   7   0   15.00    2.41
  45  -7   0    9.49    1.87
  45  -7   0   14.12    2.27
  45   7   0   10.79    1.95
 -45   7   0   11.13    2.44
 -45   7   0    9.70    2.26
 -45   7   0   11.92    2.29
  47  -7   0   19.94    2.55
  47  -7   0   20.83    2.69
  47   7   0   14.92    2.23
 -47   7   0   19.67    2.70
 -47   7   0   24.14    3.40
 -47   7   0   19.22    2.85
  49  -7   0    1.92    1.43
  49  -7   0   -0.09    1.21
  49   7   0    0.92    1.27
 -49   7   0   -1.93    1.53
 -49   7   0    2.53    1.86
 -49   7   0    0.89    1.66
  51  -7   0   23.67    2.79
  51  -7   0   25.86    2.90
 -51   7   0   21.51    2.94
 -51   7   0   24.92    3.23
  51   7   0   23.08    2.70
 -51   7   0   23.39    3.51
  53  -7   0    2.95    1.56
  53  -7   0    6.59    1.88
 -53   7   0    4.63    2.23
 -53   7   0    5.43    2.28
  53   7   0    5.54    1.76
 -53   7   0    2.47    1.81
   0  -8   0  100.16    3.81
   0  -8   0   96.56    3.99
   0  -8   0   96.25    3.19
   0   8   0  107.86    3.60
   0   8   0  102.65    4.02
   0   8   0  107.39    3.83
   0   8   0  105.97    3.58
  -2  -8   0    2.51    1.14
  -2  -8   0    3.30    0.93
   2  -8   0    3.38    1.01
   2  -8   0    2.36    0.72
   2  -8   0    3.05    1.16
  -2  -8   0    2.80    0.74
   2   8   0    2.62    0.86
  -2   8   0    3.03    0.94
  -2   8   0    1.90    0.76
  -2   8   0    2.98    1.08
   2   8   0    1.72    0.96
   2   8   0    2.37    0.82
   2   8   0    0.99    0.64
  -2   8   0    0.92    0.73
   4  -8   0  113.06    4.25
   4  -8   0  115.05    3.66
  -4  -8   0  108.84    4.35
   4  -8   0  114.31    4.21
  -4  -8   0  115.10    4.15
  -4  -8   0  115.86    3.53
   4   8   0  119.05    3.90
  -4   8   0  111.32    4.18
   4   8   0  110.39    3.62
  -4   8   0  118.17    4.15
   4   8   0  110.02    4.16
   4   8   0  108.67    3.60
  -4   8   0  108.88    3.80
  -4   8   0  113.66    3.87
   6  -8   0   13.67    1.74
  -6  -8   0   12.47    1.57
   6  -8   0   13.93    1.35
   6  -8   0   13.61    1.53
   6  -8   0   12.15    1.60
  -6  -8   0   12.24    1.18
  -6  -8   0   10.94    1.79
  -6   8   0    4.92    1.03
  -6   8   0    6.92    1.26
  -6   8   0    6.74    1.15
   6   8   0    6.71    0.99
   6   8   0    6.99    0.98
  -6   8   0    5.28    1.26
   6   8   0    5.23    1.00
   6   8   0    9.06    1.42
  -8  -8   0   41.48    1.84
   8  -8   0   37.25    1.97
   8  -8   0   40.77    2.25
  -8  -8   0   38.12    2.56
   8  -8   0   39.56    2.35
  -8  -8   0   39.25    2.30
   8  -8   0   36.21    2.31
   8   8   0   33.30    1.76
   8   8   0   36.92    2.27
  -8   8   0   33.80    2.07
  -8   8   0   37.31    2.13
  -8   8   0   37.27    2.34
   8   8   0   35.55    1.91
  -8   8   0   33.39    2.29
  10  -8   0   32.89    2.16
  10  -8   0   29.34    2.04
 -10  -8   0   34.45    2.13
  10  -8   0   30.60    1.86
 -10  -8   0   30.01    1.61
 -10  -8   0   37.87    2.65
  10  -8   0   31.78    2.15
 -10   8   0   33.80    2.09
  10   8   0   29.97    2.12
 -10   8   0   33.19    2.29
 -10   8   0   32.62    2.08
  10   8   0   29.85    1.66
 -10   8   0   31.92    2.07
 -10   8   0   29.95    2.25
  10   8   0   31.61    1.77
  12  -8   0   15.90    1.52
 -12  -8   0   14.63    1.57
  12  -8   0   14.99    1.68
  12  -8   0   13.72    1.61
 -12  -8   0   15.13    2.05
  12  -8   0   12.53    1.58
 -12  -8   0   15.61    1.30
  12   8   0   14.27    1.82
  12   8   0   15.01    1.23
 -12   8   0   16.17    1.69
 -12   8   0   15.05    1.71
  12   8   0   17.87    1.16
  12   8   0   15.57    1.32
 -12   8   0   13.11    1.69
 -12   8   0   15.20    1.75
 -12   8   0   15.58    1.65
  14  -8   0   55.52    2.72
  14  -8   0   56.88    2.85
 -14  -8   0   58.78    2.76
 -14  -8   0   57.64    2.26
  14  -8   0   58.49    2.63
 -14  -8   0   63.20    3.38
  14  -8   0   57.52    2.98
 -14   8   0   50.60    2.78
 -14   8   0   54.02    2.63
 -14   8   0   59.23    2.82
  14   8   0   54.47    2.94
 -14   8   0   53.89    3.03
 -14   8   0   55.51    2.73
  14   8   0   56.44    2.29
  14   8   0   51.96    2.09
  14   8   0   55.37    2.19
 -16  -8   0    5.26    1.52
 -16  -8   0    5.16    0.89
  16  -8   0    4.62    1.02
  16  -8   0    4.93    1.29
  16  -8   0    7.39    1.32
 -16  -8   0    6.22    1.21
  16  -8   0    6.91    1.21
  16   8   0    3.27    1.09
 -16   8   0    5.77    1.46
 -16   8   0    2.66    1.09
  16   8   0    3.36    0.74
  16   8   0    3.85    0.77
 -16   8   0    2.94    1.04
 -16   8   0    4.97    1.27
 -16   8   0    5.75    1.32
  16   8   0    3.59    0.80
 -18  -8   0   56.52    2.69
  18  -8   0   51.79    2.96
  18  -8   0   56.27    2.67
  18  -8   0   54.11    2.65
  18  -8   0   50.33    2.83
 -18  -8   0   45.36    3.06
 -18   8   0   47.31    2.46
  18   8   0   47.37    2.13
 -18   8   0   45.62    2.99
 -18   8   0   48.71    2.71
 -18   8   0   48.35    2.85
  18   8   0   46.97    2.04
 -18   8   0   47.84    2.66
  18   8   0   45.88    2.00
  18   8   0   44.55    2.75
  20  -8   0   43.99    2.76
  20  -8   0   45.75    2.71
 -20  -8   0   36.93    2.69
 -20  -8   0   44.12    2.41
  20  -8   0   44.04    2.34
 -20   8   0   39.64    2.86
  20   8   0   41.54    2.03
 -20   8   0   39.53    2.58
 -20   8   0   40.00    2.36
 -20   8   0   36.90    2.51
 -20   8   0   46.98    2.75
  20   8   0   39.27    1.84
  22  -8   0   29.18    1.91
  22  -8   0   29.26    2.33
 -22  -8   0   29.06    2.40
  22  -8   0   30.88    2.70
 -22  -8   0   28.48    2.01
 -22   8   0   20.25    2.16
 -22   8   0   21.46    1.97
  22   8   0   23.51    1.68
 -22   8   0   20.48    2.44
 -22   8   0   24.87    2.44
  22   8   0   24.48    1.43
 -22   8   0   23.66    2.38
  24  -8   0   60.58    3.21
  24  -8   0   61.32    3.30
 -24  -8   0   62.87    2.87
 -24  -8   0   63.01    3.39
  24   8   0   66.05    2.37
  24   8   0   67.23    2.83
 -24   8   0   60.80    3.65
 -24   8   0   69.97    3.46
 -24   8   0   62.10    3.29
 -24   8   0   68.58    3.08
 -24   8   0   60.51    3.34
  26  -8   0    2.39    1.20
 -26  -8   0    2.13    1.03
  26  -8   0    3.94    1.35
 -26  -8   0    2.70    1.38
  26   8   0    2.78    0.75
 -26   8   0    1.29    1.35
 -26   8   0    1.10    1.11
 -26   8   0    1.93    1.20
 -26   8   0    0.61    1.19
 -26   8   0    2.72    1.06
  26   8   0    3.88    1.03
  28  -8   0   76.70    3.72
 -28  -8   0   65.42    3.62
  28  -8   0   63.20    3.56
 -28  -8   0   66.97    3.03
 -28   8   0   62.52    3.90
 -28   8   0   62.89    3.47
 -28   8   0   65.74    3.66
 -28   8   0   67.48    3.65
 -28   8   0   67.34    3.11
  28   8   0   68.44    3.08
  30  -8   0    2.38    1.27
 -30  -8   0    3.75    1.10
 -30  -8   0    4.04    1.57
  30  -8   0    2.70    1.21
 -30   8   0    0.45    1.35
 -30   8   0    2.39    1.37
 -30   8   0    3.18    1.57
  30   8   0    2.88    1.09
 -30   8   0    4.34    1.20
 -32  -8   0   63.08    3.54
  32  -8   0   58.26    3.58
  32  -8   0   61.39    3.42
 -32   8   0   56.44    3.84
 -32   8   0   58.55    2.98
  32   8   0   60.81    3.06
 -32   8   0   55.23    3.52
 -32   8   0   55.94    3.58
  34  -8   0   12.97    1.94
 -34  -8   0   19.17    2.35
  34  -8   0   20.17    2.54
 -34   8   0   17.88    2.50
  34   8   0   17.45    1.98
 -34   8   0   18.53    2.54
 -34   8   0   15.36    2.60
 -36  -8   0   23.43    2.55
  36  -8   0   21.32    2.46
  36  -8   0   18.98    2.46
 -36   8   0   23.91    2.86
 -36   8   0   19.16    2.83
  36   8   0   21.20    2.32
 -36   8   0   15.87    2.45
 -38  -8   0   26.00    2.70
  38  -8   0   23.49    2.72
  38  -8   0   22.00    2.46
 -38   8   0   19.54    2.82
  38   8   0   26.80    2.67
 -38   8   0   26.89    3.04
 -38   8   0   25.11    2.91
  40  -8   0    4.52    1.44
 -40  -8   0    1.31    1.43
  40  -8   0    3.94    1.59
 -40   8   0    6.16    2.06
 -40   8   0    4.90    1.71
  40   8   0    8.21    1.76
 -40   8   0    7.19    2.13
  42  -8   0   18.90    2.63
  42  -8   0   26.04    2.64
 -42  -8   0   24.11    2.68
  42   8   0   18.27    2.37
 -42   8   0   21.22    3.04
 -42   8   0   20.37    2.80
 -42   8   0   20.72    3.04
 -44  -8   0   -1.05    1.26
  44  -8   0    1.29    1.19
  44  -8   0    0.22    1.31
 -44   8   0   -1.88    1.57
 -44   8   0   -0.48    1.52
  44   8   0   -0.87    1.05
 -44   8   0    0.70    1.76
  46  -8   0   14.32    2.36
 -46   8   0    9.38    2.34
 -46   8   0   14.39    2.82
 -46   8   0   10.57    2.47
  46   8   0   14.23    2.24
  48  -8   0   11.49    2.16
  48   8   0    6.61    1.86
 -48   8   0    8.36    2.40
 -48   8   0    4.63    2.10
 -48   8   0   10.41    2.49
  -1  -9   0   36.82    2.49
   1  -9   0   38.64    2.61
   1  -9   0   41.98    2.06
  -1  -9   0   38.63    2.74
  -1  -9   0   39.07    1.99
   1  -9   0   38.67    2.55
  -1   9   0   34.22    2.15
  -1   9   0   37.55    2.19
  -1   9   0   42.41    2.50
   1   9   0   40.30    2.23
  -1   9   0   37.69    2.58
   1   9   0   36.47    2.67
   1   9   0   35.66    2.44
   1   9   0   36.17    2.35
  -3  -9   0   33.17    2.98
  -3  -9   0   28.78    2.24
  -3  -9   0   26.44    1.66
   3  -9   0   28.33    2.24
   3  -9   0   31.78    2.78
   3  -9   0   29.01    1.77
  -3   9   0   25.46    2.41
  -3   9   0   25.87    1.88
  -3   9   0   27.06    2.17
   3   9   0   25.39    2.09
   3   9   0   30.46    2.09
   3   9   0   28.78    1.86
  -3   9   0   28.27    1.99
  -5  -9   0   34.71    2.73
   5  -9   0   34.77    2.45
   5  -9   0   36.36    2.56
  -5  -9   0   35.53    2.42
  -5  -9   0   33.40    1.80
   5  -9   0   34.07    1.92
  -5   9   0   29.51    2.21
  -5   9   0   28.30    2.03
  -5   9   0   28.96    2.08
   5   9   0   28.97    2.01
  -5   9   0   29.75    2.29
   5   9   0   27.10    2.26
   5   9   0   27.13    1.81
   7  -9   0    6.42    1.28
   7  -9   0    7.37    1.12
  -7  -9   0    7.18    1.60
  -7  -9   0    7.30    1.35
   7  -9   0   11.16    1.74
   7   9   0    6.66    1.19
  -7   9   0    5.77    1.31
  -7   9   0    5.12    1.20
   7   9   0    6.11    1.04
   7   9   0    6.72    1.46
  -7   9   0    5.49    1.24
  -7   9   0    6.90    1.44
  -9  -9   0   51.26    2.76
  -9  -9   0   40.38    3.00
   9  -9   0   47.55    2.35
   9  -9   0   44.42    2.69
   9  -9   0   46.87    2.85
  -9   9   0   44.37    2.60
   9   9   0   41.63    2.18
  -9   9   0   46.93    2.65
  -9   9   0   48.90    2.95
   9   9   0   47.55    2.40
  -9   9   0   54.91    2.92
  -9   9   0   49.38    2.91
   9   9   0   51.84    2.98
 -11  -9   0    6.82    1.32
  11  -9   0    9.21    1.57
  11  -9   0    7.98    1.43
  11  -9   0    7.85    1.49
  11  -9   0   10.45    1.31
 -11  -9   0    9.72    1.82
 -11   9   0    9.04    1.47
  11   9   0   10.81    1.32
  11   9   0    7.48    1.09
 -11   9   0   13.61    1.73
  11   9   0    8.33    1.55
 -11   9   0    9.96    1.73
 -11   9   0   10.14    1.63
 -11   9   0   12.96    1.89
  13  -9   0   57.91    3.14
  13  -9   0   56.53    3.03
 -13  -9   0   60.61    3.02
  13  -9   0   61.11    2.77
 -13  -9   0   57.25    3.43
  13  -9   0   58.94    3.00
 -13   9   0   56.46    3.21
  13   9   0   55.08    2.45
 -13   9   0   56.53    3.00
 -13   9   0   56.33    3.00
  13   9   0   56.83    2.54
  13   9   0   56.84    3.19
 -13   9   0   61.10    3.44
 -13   9   0   60.66    3.05
 -15  -9   0   34.25    2.41
  15  -9   0   30.91    2.50
  15  -9   0   29.69    2.35
 -15  -9   0   32.59    3.10
  15  -9   0   30.87    2.25
  15  -9   0   32.33    2.10
  15   9   0   34.48    1.91
 -15   9   0   34.89    2.47
 -15   9   0   32.79    2.74
  15   9   0   30.20    1.83
 -15   9   0   31.36    2.22
 -15   9   0   35.45    2.50
  15   9   0   32.44    2.55
 -15   9   0   32.96    2.44
  17  -9   0   13.81    2.01
 -17  -9   0   13.09    1.72
 -17  -9   0   16.76    2.40
  17  -9   0   15.01    1.64
  17  -9   0   13.40    1.82
  17  -9   0   15.54    1.86
  17   9   0   13.08    1.32
 -17   9   0   13.67    1.90
 -17   9   0   10.08    1.73
 -17   9   0   12.04    1.72
 -17   9   0   12.23    1.93
  17   9   0   13.78    1.91
 -17   9   0   11.07    1.64
  17   9   0   12.80    1.35
  19  -9   0   49.17    2.70
 -19  -9   0   49.13    2.81
  19  -9   0   47.46    2.63
  19  -9   0   47.11    3.06
  19  -9   0   52.02    3.07
 -19  -9   0   54.41    3.33
  19   9   0   50.11    2.24
  19   9   0   50.09    3.14
 -19   9   0   46.61    3.32
 -19   9   0   50.09    2.82
 -19   9   0   62.47    3.20
 -19   9   0   50.98    3.06
  19   9   0   49.27    2.27
 -19   9   0   46.99    3.08
 -21  -9   0    8.95    1.82
 -21  -9   0    7.98    1.44
  21  -9   0    6.78    1.31
  21  -9   0    5.12    1.35
  21  -9   0    7.04    1.30
  21  -9   0    6.62    1.62
  21   9   0    7.72    1.04
 -21   9   0    7.25    1.47
 -21   9   0    6.35    1.66
 -21   9   0    9.34    1.92
  21   9   0    7.43    1.69
  21   9   0    6.44    1.06
 -21   9   0    4.67    1.58
 -21   9   0    3.64    1.27
 -23  -9   0   75.88    4.07
  23  -9   0   82.75    3.93
 -23  -9   0   71.36    3.37
  23  -9   0   71.54    3.42
  23  -9   0   71.74    3.80
 -23   9   0   73.24    3.82
 -23   9   0   78.06    3.95
  23   9   0   73.00    3.83
 -23   9   0   71.71    4.17
 -23   9   0   75.45    3.53
 -23   9   0   73.45    3.75
  23   9   0   73.21    2.82
 -25  -9   0   11.07    2.05
 -25  -9   0    7.95    1.47
  25  -9   0    6.99    1.41
  25  -9   0   11.38    1.93
  25  -9   0    9.36    1.82
 -25   9   0    8.18    1.57
  25   9   0    8.70    1.16
 -25   9   0   10.40    2.03
 -25   9   0   10.53    1.96
 -25   9   0    8.33    1.74
  25   9   0    6.80    1.67
 -25   9   0   10.73    2.04
  27  -9   0   35.67    2.84
 -27  -9   0   35.36    2.82
  27  -9   0   33.40    2.48
  27  -9   0   39.27    2.82
 -27  -9   0   35.63    2.35
 -27   9   0   38.20    2.94
 -27   9   0   29.39    2.89
 -27   9   0   35.53    2.43
 -27   9   0   32.52    3.34
 -27   9   0   35.19    2.91
  27   9   0   36.73    2.93
  29  -9   0   23.01    2.57
 -29  -9   0   18.75    1.99
 -29  -9   0   19.83    2.58
  29  -9   0   24.95    2.70
 -29   9   0   22.33    2.20
  29   9   0   17.63    2.05
 -29   9   0   22.10    2.70
 -29   9   0   20.85    2.88
 -29   9   0   17.63    2.43
  31  -9   0    2.13    1.23
  31  -9   0    3.43    1.44
 -31  -9   0    6.20    1.73
 -31   9   0    3.68    1.71
 -31   9   0    5.81    1.98
  31   9   0    5.29    1.25
 -31   9   0    1.24    1.51
  33  -9   0   28.71    3.03
 -33  -9   0   33.02    3.14
  33  -9   0   22.57    2.62
 -33   9   0   27.04    2.93
  33   9   0   23.27    2.23
 -33   9   0   21.22    2.85
 -33   9   0   25.20    3.10
  35  -9   0    1.89    1.31
  35  -9   0   -0.97    1.08
 -35  -9   0    0.38    1.48
 -35   9   0    1.62    1.39
 -35   9   0    0.20    1.63
  35   9   0    0.51    1.00
 -35   9   0    0.37    1.60
  37  -9   0   29.09    2.97
 -37  -9   0   26.14    2.97
  37  -9   0   28.26    3.06
 -37   9   0   23.69    2.98
  37   9   0   20.86    2.42
 -37   9   0   23.50    3.22
 -37   9   0   27.48    3.21
 -39  -9   0    6.44    1.91
  39  -9   0    7.46    1.74
  39  -9   0    7.02    1.91
  39   9   0    8.39    1.81
 -39   9   0    8.38    2.31
 -39   9   0    7.36    2.11
 -39   9   0    5.60    2.09
  41  -9   0   21.43    2.51
 -41  -9   0   21.47    2.77
  41  -9   0   16.66    2.59
  41   9   0   22.64    2.53
 -41   9   0   19.14    2.90
 -41   9   0   18.43    2.99
 -41   9   0   14.19    2.60
  43  -9   0    5.09    1.62
  43  -9   0    4.85    1.89
 -43  -9   0    4.42    1.74
 -43   9   0    1.45    1.88
 -43   9   0    2.19    1.73
  43   9   0    4.83    1.63
 -43   9   0    6.98    2.24
  45  -9   0    3.14    1.78
  45   9   0    1.50    1.45
 -45   9   0    3.38    1.91
 -45   9   0    4.21    2.22
 -45   9   0    1.92    1.97
   0 -10   0   50.55    3.03
   0 -10   0   45.80    3.22
   0  10   0   43.28    2.87
   0  10   0   48.16    2.89
   0  10   0   47.08    2.62
   2 -10   0    0.58    1.21
  -2 -10   0   -0.24    1.07
   2 -10   0    2.65    1.21
  -2 -10   0    1.72    1.19
  -2  10   0    1.41    1.25
  -2  10   0    1.22    0.97
   2  10   0    2.25    1.27
   2  10   0    1.53    0.99
  -2  10   0    1.36    1.08
   2  10   0    1.32    0.92
   4 -10   0   26.84    2.68
  -4 -10   0   22.64    2.60
  -4 -10   0   30.18    2.44
   4 -10   0   31.77    2.54
  -4  10   0   23.10    2.16
   4  10   0   24.79    2.52
  -4  10   0   27.51    2.60
   4  10   0   26.85    2.40
  -4  10   0   25.11    2.48
   4  10   0   27.14    2.00
   6 -10   0   22.90    2.51
  -6 -10   0   20.34    2.56
   6 -10   0   25.64    2.60
  -6 -10   0   22.51    2.25
  -6  10   0   26.61    2.70
  -6  10   0   25.84    2.64
   6  10   0   27.50    2.32
   6  10   0   27.11    2.16
   6  10   0   26.26    1.98
  -6  10   0   26.30    2.37
  -6  10   0   26.05    2.43
  -6  10   0   25.76    2.17
   8 -10   0   15.39    1.60
  -8 -10   0   15.90    2.33
   8 -10   0   16.53    2.21
   8 -10   0   12.66    2.01
  -8 -10   0   13.59    1.93
   8  10   0   17.50    1.76
  -8  10   0   16.78    1.98
   8  10   0   16.60    2.10
  -8  10   0   16.63    2.20
  -8  10   0   13.09    1.93
  -8  10   0   17.69    2.00
  -8  10   0   15.53    2.12
   8  10   0   17.14    1.87
  10 -10   0   48.53    2.51
  10 -10   0   55.32    3.15
 -10 -10   0   46.80    3.46
  10 -10   0   50.17    3.21
 -10 -10   0   49.98    3.03
 -10  10   0   49.90    3.12
 -10  10   0   57.71    3.10
  10  10   0   50.51    3.24
 -10  10   0   53.38    3.14
  10  10   0   48.18    2.50
 -10  10   0   50.80    3.29
 -10  10   0   51.60    3.00
  10  10   0   50.81    2.69
 -12 -10   0    2.73    1.18
  12 -10   0    3.90    1.31
  12 -10   0    4.70    1.40
  12 -10   0    5.59    1.22
 -12 -10   0    6.52    1.81
 -12  10   0    2.41    1.30
  12  10   0    2.12    1.35
  12  10   0    0.59    0.88
 -12  10   0    3.57    1.41
 -12  10   0    3.74    1.40
 -12  10   0    2.04    1.14
  12  10   0    2.64    0.94
 -12  10   0    2.89    1.30
  14 -10   0   57.17    3.25
 -14 -10   0   63.90    3.82
  14 -10   0   63.98    3.02
  14 -10   0   61.08    3.56
 -14 -10   0   60.27    3.28
 -14  10   0   58.75    3.68
 -14  10   0   60.51    3.36
 -14  10   0   57.58    3.47
 -14  10   0   58.92    3.16
  14  10   0   59.63    2.80
  14  10   0   58.89    3.42
  14  10   0   58.82    2.72
 -14  10   0   67.52    3.47
  16 -10   0    8.57    1.68
 -16 -10   0    5.08    1.73
 -16 -10   0    5.45    1.52
  16 -10   0    3.20    1.35
  16 -10   0    5.55    1.22
  16 -10   0    7.18    1.70
  16  10   0    6.77    1.72
 -16  10   0    5.44    1.49
  16  10   0    6.38    1.17
 -16  10   0    4.56    1.57
 -16  10   0    4.41    1.58
  16  10   0    4.71    1.03
 -16  10   0    5.12    1.51
 -16  10   0    5.74    1.50
  18 -10   0   47.46    3.06
  18 -10   0   38.95    2.51
 -18 -10   0   45.62    2.93
  18 -10   0   42.42    2.75
 -18 -10   0   42.44    3.38
  18 -10   0   39.42    2.94
 -18  10   0   41.71    2.95
 -18  10   0   43.44    3.11
  18  10   0   41.73    2.25
 -18  10   0   44.43    3.45
 -18  10   0   43.75    2.73
 -18  10   0   42.28    3.00
  18  10   0   46.75    3.20
  20 -10   0   20.74    2.48
  20 -10   0   16.45    2.27
  20 -10   0   19.37    3.27
 -20 -10   0   21.92    2.31
 -20 -10   0   15.51    2.39
  20 -10   0   18.99    2.08
 -20  10   0   21.14    2.74
 -20  10   0   17.98    2.32
 -20  10   0   22.99    2.43
 -20  10   0   25.03    2.65
 -20  10   0   19.58    2.45
  20  10   0   18.51    2.51
  20  10   0   19.24    1.72
 -22 -10   0   14.23    2.37
 -22 -10   0   17.05    2.04
  22 -10   0   17.93    2.51
  22 -10   0   14.48    1.87
  22 -10   0   15.34    2.18
  22  10   0   12.26    1.41
 -22  10   0   14.85    2.24
  22  10   0   14.40    2.30
 -22  10   0   16.27    2.38
 -22  10   0   11.13    2.20
 -22  10   0   19.02    2.19
 -22  10   0   16.93    2.30
 -24 -10   0   25.49    2.42
  24 -10   0   19.87    2.16
  24 -10   0   20.31    2.64
 -24 -10   0   26.51    3.07
  24 -10   0   29.69    3.00
  24  10   0   19.23    2.55
 -24  10   0   22.13    2.63
 -24  10   0   19.79    2.63
  24  10   0   21.21    1.71
 -24  10   0   23.19    2.77
 -24  10   0   22.61    2.97
 -24  10   0   18.45    2.18
  26 -10   0    3.16    1.44
  26 -10   0    1.77    1.51
 -26 -10   0    0.30    1.12
  26 -10   0    3.79    1.30
 -26 -10   0    3.15    1.69
 -26  10   0    1.73    1.62
 -26  10   0    1.69    1.26
  26  10   0    2.98    1.53
 -26  10   0    1.99    1.80
 -26  10   0    3.66    1.79
 -26  10   0    0.74    1.42
  26  10   0    2.89    0.95
  28 -10   0   17.91    2.37
  28 -10   0   17.97    2.21
 -28 -10   0   17.39    2.63
  28 -10   0   18.11    2.55
 -28  10   0   21.62    2.74
 -28  10   0   15.26    2.36
  28  10   0   15.53    1.55
 -28  10   0   15.20    2.51
  28  10   0   19.74    2.68
 -28  10   0   15.67    2.12
  30 -10   0    1.05    1.15
  30 -10   0    2.23    1.47
  30 -10   0   -0.66    1.16
 -30 -10   0    0.77    1.48
  30  10   0    0.50    1.43
 -30  10   0   -0.91    1.52
 -30  10   0   -0.68    1.41
 -30  10   0    1.63    1.55
  30  10   0    0.64    0.76
  32 -10   0    8.16    1.79
  32 -10   0   11.67    2.20
  32 -10   0   10.27    2.15
 -32 -10   0   10.59    2.32
 -32  10   0    5.72    1.94
 -32  10   0    8.65    2.15
  32  10   0   10.68    1.37
 -32  10   0    5.74    2.06
  32  10   0    6.58    1.90
 -34 -10   0   17.87    2.68
  34 -10   0   14.95    2.42
  34 -10   0   14.57    2.24
  34 -10   0   16.92    2.53
  34  10   0   12.99    2.51
 -34  10   0   12.83    2.42
  34  10   0   11.82    1.41
 -34  10   0    5.77    2.07
 -34  10   0   11.53    2.36
  36 -10   0    3.69    1.69
  36 -10   0    3.78    1.52
  36 -10   0    3.36    1.67
 -36 -10   0    5.75    1.92
 -36  10   0    3.10    2.02
 -36  10   0    3.54    1.86
  36  10   0    5.15    1.85
 -36  10   0    2.64    1.95
  36  10   0    3.55    1.03
  38 -10   0   10.80    2.08
  38 -10   0   16.99    2.75
 -38 -10   0   11.68    2.35
  38 -10   0   14.25    2.28
 -38  10   0   12.68    2.47
  38  10   0   14.39    1.57
 -38  10   0   15.56    2.88
 -38  10   0   14.89    2.67
  38  10   0   16.71    2.79
   1 -11   0   24.90    2.74
  -1 -11   0   20.73    2.74
   1 -11   0   24.66    2.76
  -1 -11   0   22.19    2.42
   1  11   0   20.86    2.17
  -1  11   0   24.57    2.55
  -1  11   0   24.68    2.31
   1  11   0   27.03    2.66
   1  11   0   24.48    2.79
  -1  11   0   22.32    2.66
   3 -11   0    3.41    1.37
  -3 -11   0    3.98    1.47
   3 -11   0    2.75    1.55
  -3 -11   0    2.14    1.63
  -3  11   0    5.15    1.66
  -3  11   0    1.09    1.28
  -3  11   0    4.57    1.31
  -3  11   0    2.71    1.47
   3  11   0    5.02    1.61
   3  11   0    2.38    1.25
   3  11   0    3.24    1.19
  -5 -11   0   39.58    3.60
  -5 -11   0   37.28    2.84
   5 -11   0   35.95    3.27
   5 -11   0   33.09    2.68
  -5  11   0   45.38    3.15
  -5  11   0   42.12    3.00
  -5  11   0   43.02    2.85
   5  11   0   42.48    2.81
   5  11   0   37.10    2.90
  -5  11   0   35.70    2.94
   5  11   0   41.44    2.58
   7 -11   0    1.81    1.36
  -7 -11   0    0.70    1.37
   7 -11   0   -0.31    0.99
  -7 -11   0    0.49    1.19
  -7  11   0    1.30    1.34
  -7  11   0    2.37    1.21
   7  11   0    0.80    1.05
  -7  11   0    1.96    1.16
   7  11   0    0.43    0.85
   7  11   0    1.98    1.32
  -7  11   0    0.19    1.29
  -9 -11   0   34.94    3.58
   9 -11   0   42.04    3.09
   9 -11   0   35.91    3.25
  -9 -11   0   37.55    2.81
  -9  11   0   33.15    2.98
  -9  11   0   34.91    3.28
  -9  11   0   30.41    3.12
   9  11   0   35.10    2.50
   9  11   0   32.41    2.31
   9  11   0   38.93    3.03
  -9  11   0   36.04    2.72
 -11 -11   0    3.26    1.42
 -11 -11   0    2.69    1.78
  11 -11   0    6.83    1.92
  11 -11   0    9.40    1.81
 -11  11   0    1.62    1.24
 -11  11   0    3.63    1.33
  11  11   0    4.31    1.21
 -11  11   0    7.16    1.88
 -11  11   0    3.32    1.37
  11  11   0    4.00    1.21
  11  11   0    2.63    1.42
  13 -11   0    9.19    1.86
 -13 -11   0    8.67    1.78
 -13 -11   0    9.34    2.16
  13 -11   0   10.76    1.94
 -13  11   0   10.38    1.89
  13  11   0    9.61    1.50
 -13  11   0   10.25    1.96
 -13  11   0    7.80    1.85
 -13  11   0    8.85    2.01
 -13  11   0    9.92    1.81
  13  11   0    9.92    1.87
  13  11   0   10.03    1.50
  15 -11   0   28.93    3.05
 -15 -11   0   26.77    3.11
 -15 -11   0   28.73    2.73
  15 -11   0   31.52    2.89
 -15  11   0   28.30    2.87
 -15  11   0   26.21    3.06
 -15  11   0   25.62    2.91
  15  11   0   25.22    2.04
  15  11   0   30.01    3.11
 -15  11   0   23.55    2.61
 -15  11   0   22.60    2.59
  17 -11   0    6.79    1.67
 -17 -11   0    8.97    2.23
  17 -11   0    9.86    2.09
 -17 -11   0   10.32    1.87
 -17  11   0    4.51    1.57
 -17  11   0    7.92    1.86
 -17  11   0    6.58    1.77
  17  11   0    4.67    1.18
 -17  11   0    3.78    1.64
 -17  11   0    7.17    2.02
  17  11   0    6.08    1.81
 -19 -11   0   28.87    2.86
 -19 -11   0   33.04    3.57
  19 -11   0   37.32    3.46
 -19  11   0   27.64    2.80
 -19  11   0   29.08    3.11
 -19  11   0   26.41    3.14
 -19  11   0   28.22    2.76
  19  11   0   30.41    3.12
 -19  11   0   31.58    3.13
  19  11   0   27.54    2.06
 -21 -11   0   -0.38    1.25
  21 -11   0   -1.11    1.25
 -21 -11   0   -1.13    1.45
 -21  11   0    2.15    1.44
  21  11   0    0.05    0.83
 -21  11   0    0.63    1.26
 -21  11   0    2.06    1.51
  21  11   0   -0.19    1.34
 -21  11   0    1.12    1.56
 -21  11   0    0.10    1.49
 -23 -11   0   28.40    3.18
 -23 -11   0   26.08    2.62
  23 -11   0   24.50    3.03
 -23  11   0   25.78    2.95
 -23  11   0   24.02    3.01
  23  11   0   26.75    1.99
 -23  11   0   19.79    2.91
 -23  11   0   23.57    2.83
  23  11   0   29.76    3.25
 -23  11   0   26.83    2.71
  25 -11   0    4.27    1.46
 -25 -11   0    3.32    1.42
 -25 -11   0    3.75    2.01
  25 -11   0    1.00    1.34
  25 -11   0    0.56    1.50
 -25  11   0    3.36    1.84
  25  11   0    3.29    1.69
 -25  11   0    3.40    1.93
 -25  11   0    3.67    1.69
  25  11   0    2.43    1.01
 -25  11   0    2.65    1.44
  27 -11   0   15.34    2.56
  27 -11   0   12.63    2.25
 -27 -11   0   12.08    2.50
  27 -11   0   13.16    2.01
  27  11   0   11.52    1.47
 -27  11   0   14.82    2.76
 -27  11   0   12.55    2.41
 -27  11   0   11.02    2.30
  27  11   0   12.45    2.34
  29 -11   0   17.71    2.83
  29 -11   0    8.99    2.10
  29 -11   0   11.30    1.91
 -29 -11   0   16.31    2.61
 -29  11   0   13.17    2.56
 -29  11   0   10.93    2.41
  29  11   0   16.15    2.61
 -29  11   0    9.77    2.12
  29  11   0   16.33    1.68
  31 -11   0    4.95    1.53
  31 -11   0    2.25    1.66
  31 -11   0    2.54    1.63
 -31 -11   0    2.71    1.90
 -31  11   0    5.96    2.07
  31  11   0    3.71    1.05
 -31  11   0    8.17    2.30
  31  11   0    1.16    1.62
 -31  11   0    4.22    2.06
   0 -12   0   28.47    2.99
   0 -12   0   32.33    3.37
   0  12   0   43.45    3.37
   0  12   0   41.51    3.31
   0  12   0   35.59    3.07
   0  12   0   34.48    2.73
   2 -12   0    1.07    1.50
  -2 -12   0    4.63    1.86
   2 -12   0    1.84    1.48
  -2 -12   0    1.75    1.44
  -2  12   0    2.11    1.38
   2  12   0    2.61    1.43
   2  12   0    2.20    1.12
  -2  12   0    2.85    1.69
   2  12   0    0.35    1.30
  -2  12   0    1.82    1.39
   2  12   0    2.18    1.48
  -2  12   0    0.92    1.12
   4 -12   0   28.60    3.02
  -4 -12   0   23.06    3.08
   4 -12   0   19.01    2.78
  -4 -12   0   25.05    2.78
   4  12   0   26.04    2.42
  -4  12   0   26.05    2.64
  -4  12   0   18.40    2.60
  -4  12   0   27.19    2.92
   4  12   0   28.81    3.23
   4  12   0   23.22    2.61
  -4  12   0   29.30    3.06
   6 -12   0   13.72    2.30
  -6 -12   0   16.33    2.76
   6 -12   0   12.18    2.28
  -6 -12   0   14.45    2.30
  -6  12   0   12.41    2.04
   6  12   0   15.16    1.96
   6  12   0    8.65    1.82
  -6  12   0   15.31    2.44
   6  12   0   10.96    2.14
  -6  12   0   10.64    2.08
  -6  12   0    7.86    1.89
  -8 -12   0   21.16    2.65
   8 -12   0   18.57    2.63
  -8 -12   0   16.20    2.65
   8 -12   0   24.97    2.98
  -8  12   0   11.79    2.33
   8  12   0   22.36    2.30
  -8  12   0   23.37    2.72
  -8  12   0   15.95    2.41
  -8  12   0   20.83    2.42
   8  12   0   14.25    2.49
   8  12   0   21.39    2.43
 -10 -12   0   20.73    3.09
  10 -12   0   19.14    2.61
  10 -12   0   14.27    2.21
 -10 -12   0   17.64    2.43
  10  12   0   17.00    1.94
  10  12   0   20.91    2.84
 -10  12   0   22.31    2.88
 -10  12   0   17.42    2.47
 -10  12   0   19.72    2.52
 -10  12   0   17.65    2.45
  12 -12   0    2.54    1.59
  12 -12   0    6.35    1.98
 -12 -12   0    5.59    2.12
 -12 -12   0    4.41    1.64
 -12  12   0    4.18    1.72
 -12  12   0    4.36    1.64
  12  12   0    4.21    1.22
  12  12   0    3.62    1.78
 -12  12   0    3.55    1.57
 -12  12   0    7.37    2.12
  14 -12   0   14.63    2.32
 -14 -12   0   12.52    2.67
 -14 -12   0   19.03    2.49
  14 -12   0   17.39    2.61
 -14  12   0    6.75    1.92
  14  12   0   12.49    2.40
 -14  12   0   11.96    2.28
 -14  12   0   11.37    2.45
 -14  12   0    9.01    1.91
  14  12   0    8.12    1.50
 -16 -12   0    3.90    2.06
  16 -12   0    5.03    1.78
 -16 -12   0    5.60    1.71
 -16  12   0    3.19    1.62
  16  12   0    4.21    1.82
 -16  12   0    4.84    1.95
 -16  12   0    2.02    1.51
 -16  12   0    2.22    1.56
  16  12   0    4.42    1.24
  18 -12   0   20.45    2.84
 -18 -12   0   21.79    2.70
 -18 -12   0   23.18    3.28
 -18  12   0   18.14    2.44
  18  12   0   15.34    1.82
 -18  12   0   18.72    2.72
 -18  12   0   18.33    2.87
 -18  12   0   15.02    3.85
 -18  12   0   15.41    2.38
  18  12   0   16.44    2.57
 -20 -12   0    8.73    2.31
 -20 -12   0    5.22    1.81
  20 -12   0    9.92    2.28
  20  12   0    9.42    1.54
 -20  12   0    8.23    2.03
 -20  12   0    7.13    1.91
 -20  12   0    7.36    2.19
 -20  12   0    7.77    2.18
 -20  12   0    6.83    2.05
  20  12   0   13.34    2.45
  22 -12   0    8.68    2.21
 -22 -12   0    6.52    1.77
 -22 -12   0    6.82    2.27
 -22  12   0    9.29    2.07
  22  12   0    8.21    1.48
 -22  12   0    3.60    1.85
 -22  12   0    7.50    2.21
 -22  12   0    4.60    1.88
  22  12   0    5.88    1.99
 -22  12   0    7.27    2.20
  62   0  -1   24.02    2.63
  62   0  -1   25.53    2.90
  60   0  -1    0.72    1.31
  60   0  -1    3.90    1.39
  58   0  -1   36.91    3.18
  58   0  -1   31.46    3.17
  56   0  -1    1.75    1.36
  56   0  -1    1.09    1.14
  54   0  -1   10.47    1.94
  54   0  -1   10.87    1.77
  52   0  -1   28.89    2.74
  52   0  -1   29.46    2.69
 -50   0   1    1.49    0.89
  50   0  -1    0.37    0.97
  50   0  -1    0.48    0.96
 -48   0   1   56.38    2.59
  48   0  -1   61.30    3.15
  48   0  -1   58.88    3.26
  46   0  -1    6.44    1.15
 -46   0   1    6.09    1.15
  46   0  -1    5.60    1.36
  46   0  -1    8.70    1.52
  44   0  -1   30.76    1.88
 -44   0   1   30.47    1.93
  44   0  -1   31.45    2.19
  44   0  -1   31.36    2.37
 -42   0   1   41.80    2.13
  42   0  -1   39.46    2.13
  42   0  -1   40.43    2.59
  42   0  -1   44.67    2.47
 -42   0   1   43.34    2.01
 -40   0   1    8.71    1.32
 -40   0   1    8.90    1.09
  40   0  -1    9.61    1.18
  40   0  -1   10.01    1.49
 -40   0   1   10.13    1.24
  40   0  -1    8.90    1.34
  38   0  -1   68.31    3.10
 -38   0   1   69.12    3.00
  38   0  -1   68.28    2.97
 -38   0   1   67.76    2.54
  38   0  -1   67.71    2.66
 -38   0   1   70.75    2.73
 -38   0   1   72.77    3.39
 -36   0   1   20.80    1.39
  36   0  -1   20.38    1.40
  36   0  -1   17.25    1.79
 -36   0   1   22.62    1.88
 -36   0   1   20.25    1.50
  36   0  -1   16.51    1.60
 -36   0   1   22.43    1.73
  34   0  -1  145.66    4.59
 -34   0   1  144.22    4.92
 -34   0   1  149.51    4.36
 -34   0   1  152.79    4.65
  34   0  -1  143.06    4.73
 -34   0   1  138.68    4.13
  34   0  -1  150.84    4.28
  32   0  -1   25.32    1.77
 -32   0   1   22.04    0.87
 -32   0   1   22.57    1.65
  32   0  -1   21.86    1.36
  32   0  -1   21.95    1.50
 -32   0   1   23.06    1.50
 -32   0   1   21.75    1.38
 -32   0   1   24.03    1.90
 -30   0   1  132.63    3.92
  30   0  -1  122.25    4.17
 -30   0   1  137.71    4.20
 -30   0   1  133.85    3.82
 -30   0   1  131.02    3.18
  30   0  -1  132.19    4.08
 -30   0   1  129.80    4.45
  30   0  -1  131.01    3.80
  28   0  -1   11.04    1.19
 -28   0   1   11.32    1.05
  28   0  -1   10.42    0.98
  28   0  -1    9.53    1.15
 -28   0   1   10.83    1.20
 -28   0   1    9.97    1.29
 -28   0   1    9.28    0.61
 -28   0   1   11.27    1.12
 -26   0   1  131.29    4.05
 -26   0   1  134.48    4.31
  26   0  -1  136.83    3.99
  26   0  -1  135.63    3.73
 -26   0   1  136.56    3.26
 -26   0   1  134.61    3.89
  26   0  -1  129.44    4.09
 -26   0   1  133.79    3.74
 -24   0   1  129.21    4.18
  24   0  -1  138.60    3.91
 -24   0   1  131.61    3.24
  24   0  -1  132.55    3.64
 -24   0   1  134.31    3.76
 -24   0   1  132.15    3.97
 -24   0   1  136.00    3.82
  24   0  -1  136.31    4.03
 -24   0   1  131.98    3.69
 -22   0   1    8.43    0.86
 -22   0   1    8.58    1.00
 -22   0   1    7.86    1.06
 -22   0   1    8.74    0.95
  22   0  -1    7.93    0.87
  22   0  -1    8.20    0.79
  22   0  -1   10.18    1.08
 -22   0   1    7.93    0.58
 -22   0   1    7.82    0.80
 -20   0   1  181.06    4.84
  20   0  -1  181.70    4.74
 -20   0   1  182.45    4.64
 -20   0   1  175.11    4.21
  20   0  -1  183.53    4.54
  20   0  -1  186.03    4.89
 -20   0   1  176.34    4.69
 -20   0   1  185.82    5.14
  18   0  -1    2.44    0.86
 -18   0   1    2.38    0.55
 -18   0   1    2.62    0.64
 -18   0   1    2.83    0.77
 -16   0   1   69.75    2.20
  16   0  -1   68.57    2.15
 -16   0   1   71.01    2.16
  16   0  -1   68.87    1.99
  16   0  -1   68.22    2.23
 -16   0   1   71.93    2.33
 -16   0   1   68.91    2.48
  16   0  -1   67.97    2.24
  14   0  -1  305.70    7.06
  14   0  -1  310.24    7.18
 -14   0   1  306.44    7.10
 -14   0   1  306.61    7.45
 -14   0   1  307.53    7.14
  14   0  -1  298.99    7.14
 -14   0   1  302.88    7.20
  14   0  -1  302.34    6.89
 -12   0   1   49.90    1.64
 -12   0   1   49.83    1.68
  12   0  -1   50.10    1.61
  12   0  -1   47.90    1.40
  12   0  -1   48.59    1.63
  12   0  -1   47.41    1.53
 -12   0   1   47.06    1.18
 -12   0   1   46.31    1.63
 -12   0   1   48.05    1.59
 -12   0   1   48.53    1.83
 -10   0   1  634.93   14.49
  10   0  -1  660.49   14.04
 -10   0   1  650.74   14.25
 -10   0   1  651.00   14.26
  10   0  -1  635.75   14.16
  10   0  -1  644.07   14.26
 -10   0   1  659.67   14.30
 -10   0   1  670.38   14.29
 -10   0   1  647.73   13.90
  10   0  -1  666.18   14.25
  -8   0   1  257.59    6.07
   8   0  -1  272.44    6.03
  -8   0   1  270.67    6.08
  -8   0   1  263.35    6.27
   8   0  -1  265.41    6.06
  -8   0   1  263.05    5.82
   8   0  -1  266.92    5.85
  -8   0   1  264.54    6.06
  -8   0   1  262.46    6.04
   8   0  -1  258.27    5.95
   8   0  -1  281.74    5.87
  -6   0   1  458.31   10.31
  -6   0   1  487.52   10.28
  -6   0   1  485.60   10.31
   6   0  -1  476.80    9.99
   6   0  -1  446.53   10.22
   6   0  -1  475.93   10.19
  -6   0   1  469.80   10.16
   6   0  -1  472.03   10.10
   6   0  -1  470.61   10.29
  -6   0   1  470.13   10.29
  -4   0   1   21.06    0.55
   4   0  -1   21.01    0.61
  -4   0   1   21.78    0.75
  -4   0   1   23.27    0.83
  -4   0   1   22.02    0.77
  -4   0   1   22.74    0.76
   4   0  -1   22.41    0.71
   4   0  -1   19.58    0.66
  -4   0   1   24.13    0.88
  -4   0   1   20.50    0.72
   4   0  -1   23.34    0.77
   4   0  -1   22.00    0.56
  -2   0   1  909.70   20.54
  -2   0   1  908.74   20.63
  -2   0   1  955.37   20.75
   2   0  -1  975.12   20.37
  -2   0   1  934.49   20.42
   2   0  -1  949.89   20.48
   2   0  -1 1000.00   20.74
  -2   0   1  964.70   20.74
   2   0  -1  948.31   20.51
   2   0  -1  941.29   20.46
  -2   0   1  925.34   20.77
   0   0   1   65.67    1.61
   0   0   1   69.17    1.63
   0   0  -1   68.71    1.58
   0   0  -1   73.11    1.62
   0   0   1   68.60    1.63
   0   0   1   69.62    1.64
   0   0   1   70.04    1.62
   0   0  -1   72.65    1.70
   0   0  -1   68.53    1.62
   2   0   1  339.45    7.34
  -2   0  -1  349.32    7.32
   2   0   1  343.42    7.32
  -2   0  -1  343.53    7.31
   2   0   1  341.67    7.37
   2   0   1  334.41    7.31
  -2   0  -1  346.40    7.35
   2   0   1  334.24    7.30
  -2   0  -1  353.94    7.35
  -2   0  -1  340.29    7.27
   2   0   1  330.26    7.46
   2   0   1  335.19    7.27
   4   0   1  125.98    2.82
  -4   0  -1  127.62    2.78
  -4   0  -1  123.97    2.78
   4   0   1  123.45    2.82
   4   0   1  123.05    2.78
   4   0   1  120.92    2.78
  -4   0  -1  127.08    2.82
   4   0   1  121.58    2.88
   4   0   1  119.47    2.91
   4   0   1  122.70    2.67
  -4   0  -1  125.53    2.87
  -4   0  -1  122.82    2.77
  -4   0  -1  128.07    2.89
   4   0   1  126.71    2.79
  -6   0  -1  109.36    2.53
  -6   0  -1  107.75    2.58
  -6   0  -1  110.13    2.52
   6   0   1  108.28    2.37
   6   0   1  107.56    2.54
   6   0   1  110.82    2.67
  -6   0  -1  108.99    2.70
   6   0   1  108.47    2.62
   6   0   1  110.30    2.53
   6   0   1  109.25    2.54
   6   0   1  113.64    2.69
  -8   0  -1  407.62    8.96
  -8   0  -1  402.41    9.01
   8   0   1  419.29    9.12
   8   0   1  417.52    9.12
   8   0   1  402.02    8.97
   8   0   1  408.41    8.78
   8   0   1  428.47    8.98
  -8   0  -1  417.19    9.21
   8   0   1  412.83    8.97
   8   0   1  416.11    8.97
  -8   0  -1  398.45    8.94
 -10   0  -1   78.74    1.98
  10   0   1   76.42    2.10
 -10   0  -1   75.72    2.24
  10   0   1   75.90    2.13
 -10   0  -1   75.48    2.03
 -10   0  -1   69.93    1.77
  10   0   1   72.32    1.94
  10   0   1   77.95    1.98
  10   0   1   72.02    1.89
  10   0   1   76.51    1.96
 -12   0  -1   89.23    2.58
 -12   0  -1   81.76    1.99
  12   0   1   82.40    2.10
  12   0   1   85.64    2.26
  12   0   1   84.81    2.39
  12   0   1   84.36    2.25
 -12   0  -1   82.47    2.01
 -12   0  -1   85.65    2.35
  12   0   1   84.87    2.26
 -12   0  -1   86.34    2.27
  12   0   1   87.84    2.45
  14   0   1   62.08    1.84
 -14   0  -1   59.71    1.51
 -14   0  -1   62.93    1.85
 -14   0  -1   59.77    2.11
  14   0   1   58.05    1.81
  14   0   1   62.46    1.94
 -14   0  -1   59.25    1.57
  14   0   1   60.06    1.60
 -14   0  -1   64.34    1.93
  14   0   1   60.56    2.02
  16   0   1   71.75    2.35
  16   0   1   78.04    2.33
 -16   0  -1   73.39    2.46
  16   0   1   74.10    1.87
  16   0   1   72.71    2.19
 -16   0  -1   71.20    1.79
 -16   0  -1   76.90    2.30
 -16   0  -1   75.18    1.92
 -16   0  -1   75.79    2.19
  18   0   1  329.79    7.85
 -18   0  -1  309.23    7.03
 -18   0  -1  329.93    7.67
  18   0   1  314.14    7.09
 -18   0  -1  327.21    7.22
  18   0   1  319.17    7.56
 -18   0  -1  328.57    7.94
 -18   0  -1  335.38    7.53
  18   0   1  320.51    7.66
  20   0   1    6.26    0.70
 -20   0  -1    5.81    0.72
 -20   0  -1    5.49    0.91
 -20   0  -1    5.35    0.38
 -20   0  -1    5.54    0.78
  20   0   1    5.32    0.83
  20   0   1    5.52    0.39
 -20   0  -1    5.85    0.53
  20   0   1    6.21    0.78
  22   0   1  164.27    3.79
  22   0   1  176.49    4.57
  22   0   1  171.68    4.47
 -22   0  -1  172.14    4.39
 -22   0  -1  162.44    3.78
  22   0   1  166.16    4.70
 -22   0  -1  169.55    4.06
 -22   0  -1  173.04    4.85
 -22   0  -1  168.74    4.56
 -24   0  -1    4.54    0.70
 -24   0  -1    5.11    0.56
  24   0   1    4.91    0.70
 -24   0  -1    4.46    0.94
  24   0   1    6.60    0.85
  24   0   1    5.37    0.89
 -24   0  -1    4.11    0.78
 -26   0  -1  136.38    3.99
  26   0   1  132.01    3.88
 -26   0  -1  133.32    3.45
  26   0   1  134.69    3.95
  26   0   1  139.70    4.22
 -26   0  -1  137.36    3.76
 -26   0  -1  139.16    4.27
  28   0   1    6.29    0.91
 -28   0  -1    7.20    1.15
 -28   0  -1    6.14    0.91
 -28   0  -1    6.38    0.81
 -28   0  -1    6.99    0.67
  28   0   1    6.53    0.98
  28   0   1    6.62    0.86
  30   0   1   83.62    2.93
  30   0   1   84.98    3.21
 -30   0  -1   78.53    2.91
 -30   0  -1   84.34    2.72
  30   0   1   91.67    4.15
 -30   0  -1   80.63    3.24
  32   0   1   38.33    1.92
 -32   0  -1   44.30    1.87
  32   0   1   45.32    2.24
 -32   0  -1   42.11    2.33
 -32   0  -1   40.38    2.02
 -34   0  -1   17.66    1.77
 -34   0  -1   20.85    1.56
 -34   0  -1   21.56    1.36
  34   0   1   20.85    1.63
  34   0   1   24.07    1.60
 -36   0  -1  124.89    4.46
 -36   0  -1  127.40    4.10
  36   0   1  110.82    4.22
  36   0   1  121.60    3.97
 -36   0  -1  128.47    3.74
  38   0   1    1.78    0.78
 -38   0  -1    2.84    0.79
  38   0   1    1.61    0.93
  40   0   1  105.89    3.76
  40   0   1  111.82    4.03
 -40   0  -1  105.99    3.42
  40   0   1  106.81    4.20
  42   0   1    5.06    1.03
  42   0   1    4.82    1.16
  42   0   1    4.42    1.11
 -42   0  -1    5.32    0.93
  44   0   1   20.05    2.09
  44   0   1   21.49    1.91
  44   0   1   17.42    1.81
 -44   0  -1   17.79    1.36
 -46   0  -1   46.49    2.07
  46   0   1   45.93    2.62
  46   0   1   45.39    2.47
  46   0   1   42.96    2.80
  48   0   1    6.02    1.36
  48   0   1    5.38    1.15
  48   0   1    5.99    1.33
  50   0   1   57.84    2.87
  50   0   1   54.86    3.12
  50   0   1   60.22    3.45
  52   0   1    1.64    1.19
  52   0   1    1.18    0.95
  52   0   1    4.34    1.35
  54   0   1   23.53    2.58
  54   0   1   21.18    2.31
  56   0   1    9.08    1.70
  56   0   1    9.52    1.96
  58   0   1   10.66    1.98
  58   0   1   11.61    1.90
  60   0   1   12.09    2.02
  60   0   1   17.17    2.42
  62   0   1    5.57    1.61
  62   0   1    6.89    1.86
  63  -1  -1   15.89    2.46
  63  -1  -1   18.93    2.43
  63   1  -1   14.48    2.22
  63   1  -1   10.62    2.17
  61  -1  -1   14.19    2.41
  61  -1  -1   13.66    2.06
  61   1  -1   10.90    2.00
  61   1  -1   11.62    1.99
  59  -1  -1   23.99    2.59
  59  -1  -1   18.91    2.59
  59   1  -1   17.58    2.36
  59   1  -1   13.02    2.21
  57  -1  -1   19.21    2.60
  57  -1  -1   19.14    2.24
  57   1  -1   24.77    2.77
  57   1  -1   22.07    2.57
  55  -1  -1   -0.21    1.10
  55  -1  -1    1.11    1.05
  55   1  -1   -0.06    0.95
 -55   1   1    2.10    1.17
  55   1  -1    1.28    1.17
  53  -1  -1   53.93    3.03
  53  -1  -1   44.58    3.20
  53   1  -1   46.90    3.04
 -53   1   1   50.96    2.71
  53   1  -1   49.89    3.27
  51  -1  -1   10.32    1.84
  51  -1  -1   11.19    1.53
  51  -1  -1    9.13    1.51
  51   1  -1    8.47    1.74
  51   1  -1    8.45    1.52
 -51   1   1    8.34    1.44
  49  -1  -1   42.68    2.39
  49  -1  -1   38.52    2.73
  49  -1  -1   39.28    2.53
  49   1  -1   45.78    2.83
  49   1  -1   44.39    2.96
 -49   1   1   47.40    2.59
  47  -1  -1   26.49    2.48
  47  -1  -1   30.39    2.20
  47  -1  -1   31.61    2.08
  47   1  -1   28.26    2.61
  47   1  -1   28.86    2.27
 -47   1   1   28.79    2.86
 -47   1   1   30.32    2.12
  45  -1  -1    8.43    1.61
  45  -1  -1   10.03    1.35
 -45  -1   1    8.88    1.05
  45  -1  -1    7.86    1.34
 -45   1   1    7.74    1.61
 -45   1   1    9.46    1.38
  45   1  -1   12.15    1.75
  45   1  -1   11.05    1.64
  43  -1  -1   40.99    2.29
  43  -1  -1   42.61    2.71
 -43  -1   1   41.68    1.94
  43  -1  -1   47.22    2.50
 -43   1   1   50.20    2.83
  43   1  -1   46.55    2.17
 -43   1   1   43.94    2.42
 -43   1   1   50.05    2.95
  43   1  -1   47.56    2.66
  43   1  -1   48.81    2.79
  41  -1  -1    1.69    0.90
 -41  -1   1    2.00    0.73
  41  -1  -1    2.79    0.90
  41  -1  -1    2.05    0.91
 -41   1   1    2.38    1.13
 -41   1   1    2.36    0.72
 -41   1   1    1.66    0.99
  41   1  -1    2.22    0.73
 -41   1   1    3.70    1.08
  41   1  -1    1.07    0.95
  41   1  -1    3.06    1.00
 -39  -1   1   53.10    2.15
  39  -1  -1   47.86    2.34
  39  -1  -1   46.18    2.66
  39  -1  -1   45.05    2.38
  39   1  -1   46.82    2.50
 -39   1   1   45.75    2.62
 -39   1   1   43.74    2.01
  39   1  -1   48.78    2.06
 -39   1   1   46.88    2.35
 -39   1   1   47.62    2.75
  39   1  -1   45.17    2.55
  37  -1  -1   19.08    1.84
  37  -1  -1   21.29    1.58
 -37  -1   1   19.97    2.05
 -37  -1   1   19.34    1.39
 -37  -1   1   21.27    1.48
  37  -1  -1   22.82    1.89
  37   1  -1   22.10    1.90
  37   1  -1   22.24    2.02
 -37   1   1   17.80    1.94
 -37   1   1   21.05    1.36
 -37   1   1   22.69    1.91
 -37   1   1   21.00    1.71
  37   1  -1   20.22    1.34
 -35  -1   1   90.19    2.56
  35  -1  -1   85.97    3.24
 -35  -1   1   91.86    2.96
 -35  -1   1   95.84    3.10
  35  -1  -1   84.63    3.16
  35  -1  -1   85.20    3.48
 -35  -1   1   87.44    3.24
 -35   1   1   81.37    3.54
 -35   1   1   84.14    3.14
  35   1  -1   78.04    3.26
 -35   1   1   85.57    3.42
 -35   1   1   82.30    2.82
  35   1  -1   85.20    2.79
  35   1  -1   84.93    3.28
 -33  -1   1   54.49    2.36
 -33  -1   1   53.01    2.10
  33  -1  -1   49.19    2.47
 -33  -1   1   52.14    2.14
  33  -1  -1   54.63    2.30
  33  -1  -1   50.99    2.27
 -33  -1   1   51.99    1.77
  33   1  -1   59.26    2.65
  33   1  -1   59.23    2.17
 -33   1   1   64.09    2.60
 -33   1   1   57.22    2.71
 -33   1   1   59.88    2.28
 -33   1   1   57.05    2.92
  33   1  -1   57.17    2.55
 -31  -1   1   93.84    3.22
  31  -1  -1   87.48    3.38
  31  -1  -1   96.62    3.16
  31  -1  -1   97.82    3.24
 -31  -1   1   91.86    2.61
 -31  -1   1   89.17    2.93
 -31  -1   1   93.26    3.02
 -31   1   1   85.62    3.56
 -31   1   1   84.51    2.81
  31   1  -1   85.52    3.21
  31   1  -1   86.59    2.69
  31   1  -1   81.35    3.07
 -31   1   1   83.47    3.06
 -31   1   1   82.69    3.24
  29  -1  -1   94.28    3.09
 -29  -1   1   94.58    3.04
  29  -1  -1   89.54    3.34
 -29  -1   1  103.53    3.03
  29  -1  -1   93.85    3.14
 -29  -1   1   95.06    3.20
 -29  -1   1   89.04    2.63
  29   1  -1   92.83    3.18
  29   1  -1   97.88    3.34
 -29   1   1  100.83    3.34
 -29   1   1   95.02    3.68
  29   1  -1   93.50    3.35
  29   1  -1   99.63    2.90
 -29   1   1  100.29    3.52
 -29   1   1  100.22    3.08
  27  -1  -1    3.45    0.71
 -27  -1   1    2.41    0.69
  27  -1  -1    3.78    0.72
  27  -1  -1    2.97    0.76
 -27  -1   1    2.16    0.65
 -27  -1   1    2.45    0.51
  27   1  -1    2.98    0.72
  27   1  -1    3.60    0.66
 -27   1   1    2.67    0.96
 -27   1   1    2.88    0.69
  27   1  -1    4.93    0.88
 -27   1   1    2.97    0.28
 -27   1   1    2.61    0.64
 -27   1   1    2.82    0.77
 -27   1   1    2.63    0.82
  25  -1  -1  232.89    5.88
  25  -1  -1  216.12    6.09
 -25  -1   1  228.02    5.73
 -25  -1   1  225.63    5.79
  25  -1  -1  227.75    5.86
 -25  -1   1  233.03    5.97
 -25  -1   1  228.83    5.46
 -25   1   1  208.81    5.40
  25   1  -1  215.70    5.70
 -25   1   1  208.83    6.08
  25   1  -1  202.63    5.68
 -25   1   1  210.34    5.68
 -25   1   1  212.07    5.64
 -25   1   1  220.10    5.88
 -25   1   1  205.20    4.68
  25   1  -1  215.19    5.56
  25   1  -1  215.10    5.21
 -23  -1   1   30.56    1.47
  23  -1  -1   31.34    1.48
  23  -1  -1   31.74    1.50
 -23  -1   1   33.59    1.59
  23  -1  -1   35.65    1.75
 -23  -1   1   31.67    1.44
 -23  -1   1   30.50    1.24
 -23   1   1   33.83    1.71
  23   1  -1   32.61    1.31
 -23   1   1   35.49    1.69
 -23   1   1   38.17    1.58
  23   1  -1   34.24    1.55
  23   1  -1   33.73    1.63
 -23   1   1   39.91    2.04
 -23   1   1   33.45    1.80
  23   1  -1   33.52    1.68
  21  -1  -1  252.01    6.16
 -21  -1   1  249.96    6.16
  21  -1  -1  255.90    6.17
 -21  -1   1  244.32    6.02
 -21  -1   1  247.14    5.86
 -21  -1   1  242.51    6.17
  21  -1  -1  251.91    6.40
 -21   1   1  242.65    5.98
 -21   1   1  234.65    5.74
  21   1  -1  237.85    5.99
  21   1  -1  228.93    5.47
  21   1  -1  227.27    5.76
 -21   1   1  222.41    6.08
 -21   1   1  227.37    6.28
 -21   1   1  230.95    5.98
  21   1  -1  233.37    5.93
  19  -1  -1  166.49    4.35
 -19  -1   1  168.27    4.13
 -19  -1   1  159.24    4.35
  19  -1  -1  169.96    4.34
  19  -1  -1  171.34    4.57
 -19  -1   1  166.22    4.36
 -19  -1   1  172.24    4.25
 -19   1   1  153.94    4.61
  19   1  -1  160.28    3.77
 -19   1   1  165.36    4.55
 -19   1   1  159.06    4.15
  19   1  -1  165.96    4.36
  19   1  -1  152.16    4.31
 -19   1   1  170.54    4.46
  19   1  -1  161.73    3.93
 -19   1   1  166.68    4.43
  19   1  -1  160.53    4.19
  17  -1  -1   50.64    1.88
 -17  -1   1   51.51    1.65
 -17  -1   1   50.76    1.79
 -17  -1   1   49.37    1.80
  17  -1  -1   52.85    1.78
 -17  -1   1   51.02    1.68
  17  -1  -1   52.69    1.77
 -17   1   1   57.41    2.17
  17   1  -1   58.28    1.84
 -17   1   1   52.32    1.81
 -17   1   1   54.32    2.14
 -17   1   1   52.03    2.00
 -17   1   1   54.23    2.02
  17   1  -1   58.78    1.64
  17   1  -1   57.49    1.98
  17   1  -1   59.15    2.02
 -15  -1   1  184.35    4.48
 -15  -1   1  194.76    4.73
  15  -1  -1  186.09    4.60
 -15  -1   1  186.71    4.60
  15  -1  -1  184.77    4.73
 -15  -1   1  187.27    4.49
  15  -1  -1  183.70    4.54
  15   1  -1  188.51    4.56
 -15   1   1  170.64    4.69
  15   1  -1  182.40    4.36
  15   1  -1  179.35    4.13
 -15   1   1  165.70    4.33
  15   1  -1  186.19    4.52
 -15   1   1  173.08    4.59
 -15   1   1  171.46    4.58
 -15   1   1  183.04    4.74
 -13  -1   1   10.29    0.73
  13  -1  -1    9.91    0.79
 -13  -1   1    8.41    0.48
 -13  -1   1   10.31    0.67
 -13  -1   1    9.20    0.72
  13  -1  -1    8.41    0.67
 -13  -1   1    9.77    0.44
 -13  -1   1   11.58    0.87
  13  -1  -1    8.57    0.64
  13   1  -1   10.74    0.67
  13   1  -1    9.72    0.72
  13   1  -1   10.52    0.74
 -13   1   1    8.16    0.82
 -13   1   1    8.85    0.71
 -13   1   1    8.94    0.85
 -13   1   1   10.50    0.89
  13   1  -1   11.78    0.54
 -13   1   1    9.81    0.94
 -11  -1   1  112.09    2.85
  11  -1  -1  113.86    2.95
 -11  -1   1  117.09    2.62
 -11  -1   1  115.82    2.94
  11  -1  -1  114.74    2.86
 -11  -1   1  116.93    2.74
 -11  -1   1  117.61    2.97
 -11  -1   1  117.41    3.09
  11  -1  -1  121.81    3.06
 -11   1   1  113.57    3.12
  11   1  -1  116.55    2.97
 -11   1   1  113.95    2.90
 -11   1   1  111.33    3.08
 -11   1   1  115.84    3.21
  11   1  -1  113.61    2.84
  11   1  -1  114.67    2.96
 -11   1   1  113.71    3.09
  11   1  -1  117.71    2.65
   9  -1  -1  207.43    4.53
  -9  -1   1  199.71    4.53
  -9  -1   1  195.61    4.32
   9  -1  -1  195.29    4.67
  -9  -1   1  195.57    4.74
  -9  -1   1  200.67    4.49
  -9  -1   1  197.51    4.34
  -9  -1   1  197.52    4.54
   9  -1  -1  194.06    4.63
   9  -1  -1  199.19    4.50
  -9  -1   1  195.95    4.60
  -9  -1   1  209.16    4.69
  -9   1   1  209.74    5.05
   9   1  -1  213.59    4.95
  -9   1   1  221.36    5.19
  -9   1   1  206.34    5.04
   9   1  -1  215.57    4.61
   9   1  -1  212.84    4.90
  -9   1   1  219.58    5.10
  -9   1   1  201.80    4.89
   9   1  -1  206.57    4.82
  -7  -1   1  211.08    4.73
   7  -1  -1  208.82    4.81
  -7  -1   1  210.13    4.89
  -7  -1   1  215.58    4.87
   7  -1  -1  203.03    4.78
   7  -1  -1  208.85    4.69
   7  -1  -1  212.90    4.64
  -7  -1   1  206.77    4.70
  -7  -1   1  207.06    4.69
  -7  -1   1  205.67    4.55
  -7  -1   1  210.59    4.76
   7   1  -1  245.82    5.49
   7   1  -1  239.79    5.56
  -7   1   1  252.62    5.81
  -7   1   1  247.26    5.65
  -7   1   1  237.73    5.68
  -7   1   1  249.03    5.69
  -7   1   1  244.03    5.57
   7   1  -1  252.22    5.52
   5  -1  -1   67.24    1.67
  -5  -1   1   63.28    1.64
  -5  -1   1   64.79    1.56
  -5  -1   1   65.19    1.70
  -5  -1   1   66.99    1.80
   5  -1  -1   61.94    1.69
   5  -1  -1   68.49    1.74
   5  -1  -1   66.70    1.68
   5  -1  -1   66.19    1.54
  -5  -1   1   67.23    1.74
  -5  -1   1   66.93    1.66
  -5   1   1   76.68    2.00
   5   1  -1   77.29    1.90
   5   1  -1   79.91    1.86
  -5   1   1   73.17    2.03
   5   1  -1   78.50    1.95
  -5   1   1   80.84    2.14
  -5   1   1   74.40    1.96
  -3  -1   1  151.63    3.26
  -3  -1   1  154.34    3.54
   3  -1  -1  151.69    3.44
  -3  -1   1  149.47    3.45
   3  -1  -1  144.28    3.45
   3  -1  -1  147.78    3.43
  -3  -1   1  149.85    3.42
  -3  -1   1  157.59    3.54
  -3  -1   1  151.70    3.36
   3  -1  -1  149.78    3.26
   3  -1  -1  146.62    3.45
  -3   1   1  154.25    3.64
  -3   1   1  158.08    3.63
  -3   1   1  155.69    3.63
   3   1  -1  158.21    3.44
  -3   1   1  162.24    3.64
   3   1  -1  167.01    3.60
  -3   1   1  155.96    3.42
   3   1  -1  157.39    3.47
   3   1  -1  158.12    3.59
  -3   1   1  155.77    3.72
   1  -1  -1  352.00    7.45
   1  -1  -1  342.61    7.36
  -1  -1   1  332.19    7.47
   1  -1  -1  336.01    7.49
   1  -1  -1  330.20    7.41
  -1  -1   1  345.65    7.57
  -1  -1   1  343.97    7.26
  -1  -1   1  349.25    7.36
   1  -1  -1  330.39    7.44
  -1  -1   1  349.97    7.45
   1  -1  -1  342.61    7.28
   1   1  -1  313.62    6.52
  -1   1   1  306.33    6.73
  -1   1   1  301.73    6.64
  -1   1   1  300.23    6.63
  -1   1   1  311.32    6.54
  -1   1   1  291.46    6.72
  -1   1   1  303.60    6.69
   1   1  -1  309.50    6.66
   1   1  -1  316.83    6.71
  -1  -1  -1  223.85    5.32
  -1  -1  -1  240.26    5.41
   1  -1   1  245.68    5.40
   1  -1   1  247.72    5.38
   1  -1   1  246.89    5.49
  -1  -1  -1  227.74    5.35
   1  -1   1  244.79    5.38
   1  -1   1  254.46    5.37
   1   1   1  233.73    5.18
  -1   1  -1  240.69    5.21
  -1   1  -1  231.97    5.26
   1   1   1  235.76    5.24
  -1   1  -1  252.69    5.28
  -1   1  -1  240.84    5.30
  -1   1  -1  232.35    5.25
   1   1   1  242.11    5.10
   1   1   1  230.07    5.07
   3  -1   1  331.10    7.10
  -3  -1  -1  314.48    6.97
   3  -1   1  316.34    7.02
   3  -1   1  322.53    7.01
  -3  -1  -1  307.64    6.93
  -3  -1  -1  314.67    7.00
   3  -1   1  299.70    6.98
   3  -1   1  325.68    7.04
  -3   1  -1  269.51    5.91
  -3   1  -1  267.81    5.94
  -3   1  -1  268.53    5.93
  -3   1  -1  258.12    5.98
  -3   1  -1  275.16    5.86
  -5  -1  -1  110.16    2.68
   5  -1   1  113.67    2.67
  -5  -1  -1  112.98    2.68
   5  -1   1  107.43    2.72
   5  -1   1  112.60    2.77
   5  -1   1  111.08    2.74
  -5  -1  -1  111.09    2.71
   5  -1   1  108.18    2.79
  -5   1  -1  130.98    3.05
  -5   1  -1  128.73    3.08
  -5   1  -1  130.07    3.09
  -5   1  -1  127.75    3.14
  -7  -1  -1  224.82    5.18
   7  -1   1  228.53    5.34
   7  -1   1  228.53    5.23
   7  -1   1  234.75    5.24
  -7  -1  -1  227.04    5.18
   7  -1   1  233.65    5.27
  -7  -1  -1  222.11    5.18
   7  -1   1  222.27    5.23
  -7   1  -1  296.81    6.58
  -7   1  -1  286.09    6.57
  -7   1  -1  298.30    6.58
   7   1   1  304.30    6.33
  -7   1  -1  279.77    6.63
   9  -1   1   78.56    2.16
  -9  -1  -1   77.00    1.83
   9  -1   1   76.12    2.23
   9  -1   1   78.77    2.08
  -9  -1  -1   76.28    2.05
   9  -1   1   77.55    2.15
  -9  -1  -1   78.89    2.07
  -9  -1  -1   78.40    2.12
   9  -1   1   77.89    1.82
   9  -1   1   77.33    2.17
  -9   1  -1  107.25    2.76
  -9   1  -1  109.98    2.74
   9   1   1  107.84    2.39
  -9   1  -1  110.75    2.77
  -9   1  -1  104.49    2.83
   9   1   1  111.31    2.54
  -9   1  -1  108.02    2.45
   9   1   1  106.49    2.42
   9   1   1  110.01    2.68
   9   1   1  105.38    2.38
 -11  -1  -1  183.31    4.38
 -11  -1  -1  182.73    4.29
  11  -1   1  176.97    4.24
  11  -1   1  190.02    4.43
 -11  -1  -1  176.95    4.23
  11  -1   1  187.43    4.43
  11  -1   1  171.71    3.92
  11  -1   1  185.07    4.53
  11  -1   1  174.70    4.43
 -11   1  -1  188.58    4.57
  11   1   1  190.35    4.28
  11   1   1  194.43    4.51
  11   1   1  197.97    4.41
 -11   1  -1  188.01    4.24
 -11   1  -1  188.07    4.69
 -11   1  -1  194.29    4.65
  11   1   1  195.66    4.29
  11   1   1  181.62    4.60
 -11   1  -1  199.68    4.61
  11   1   1  192.18    4.26
  13  -1   1  216.05    4.93
  13  -1   1  215.89    5.18
 -13  -1  -1  219.12    5.12
 -13  -1  -1  208.10    4.62
 -13  -1  -1  210.56    4.93
  13  -1   1  209.92    5.22
  13  -1   1  207.54    5.23
 -13   1  -1  216.27    4.85
  13   1   1  223.06    5.31
 -13   1  -1  227.37    5.23
  13   1   1  221.14    4.93
 -13   1  -1  218.51    5.32
  13   1   1  217.46    4.97
  13   1   1  228.25    5.16
 -13   1  -1  214.07    5.22
 -13   1  -1  211.42    5.32
  13   1   1  211.28    5.04
  13   1   1  214.99    4.99
  15  -1   1    0.45    0.46
 -15  -1  -1    0.70    0.24
 -15  -1  -1    0.70    0.35
  15  -1   1    1.02    0.44
 -15  -1  -1    1.08    0.37
  15  -1   1    0.42    0.29
  15   1   1    0.08    0.26
  15   1   1    0.30    0.25
  15   1   1    0.00    0.25
 -15   1  -1    0.40    0.38
 -15   1  -1   -0.38    0.46
 -15   1  -1    0.23    0.40
  15   1   1    0.21    0.32
  15   1   1   -0.31    0.38
 -15   1  -1    0.01    0.24
 -15   1  -1    0.07    0.42
 -17  -1  -1  364.48    8.02
  17  -1   1  366.43    8.11
 -17  -1  -1  359.56    8.16
 -17  -1  -1  367.33    8.27
  17  -1   1  370.92    8.67
 -17  -1  -1  358.67    7.97
  17  -1   1  363.39    8.60
  17   1   1  382.05    8.61
 -17   1  -1  382.26    8.94
  17   1   1  358.47    8.79
 -17   1  -1  384.65    8.72
 -17   1  -1  378.26    8.85
  17   1   1  371.92    8.28
 -17   1  -1  372.58    8.26
  17   1   1  367.05    8.46
 -19  -1  -1   11.73    0.83
  19  -1   1   10.61    0.99
 -19  -1  -1   10.76    0.71
 -19  -1  -1   13.14    0.69
  19  -1   1   12.49    1.00
  19  -1   1   10.84    0.63
  19   1   1   12.58    0.79
 -19   1  -1   12.88    0.68
  19   1   1   12.98    0.88
 -19   1  -1   11.78    1.07
  19   1   1   12.08    0.63
 -19   1  -1    9.65    1.07
 -19   1  -1   14.54    1.02
  19   1   1   10.98    1.02
  21  -1   1  122.49    3.73
 -21  -1  -1  128.09    3.39
 -21  -1  -1  128.98    3.17
  21  -1   1  125.43    3.67
  21  -1   1  121.97    3.06
 -21  -1  -1  124.66    3.16
 -21   1  -1  127.57    3.61
 -21   1  -1  128.92    3.93
  21   1   1  125.23    3.01
 -21   1  -1  129.20    3.77
  21   1   1  117.64    3.66
  21   1   1  126.15    3.37
 -21   1  -1  121.15    3.10
  21   1   1  126.50    3.48
  23  -1   1  115.98    2.87
 -23  -1  -1  117.12    3.28
  23  -1   1  121.68    3.58
 -23  -1  -1  122.26    3.06
 -23  -1  -1  114.24    3.00
  23  -1   1  112.55    3.62
 -23   1  -1  102.38    3.48
 -23   1  -1  111.11    3.38
  23   1   1  102.83    3.02
  23   1   1  100.55    2.93
 -23   1  -1   99.26    3.15
  23   1   1   98.45    2.45
 -23   1  -1   99.95    2.64
  23   1   1  100.02    3.26
 -25  -1  -1   57.54    1.73
  25  -1   1   53.79    2.20
 -25  -1  -1   54.51    2.00
 -25  -1  -1   58.73    1.81
  25  -1   1   56.71    2.36
  25   1   1   51.94    1.95
 -25   1  -1   54.30    2.15
 -25   1  -1   51.02    2.02
 -25   1  -1   49.55    2.38
  25   1   1   52.41    1.90
  25   1   1   49.35    1.32
 -25   1  -1   54.10    2.28
 -25   1  -1   48.82    1.59
  25   1   1   50.57    2.17
 -27  -1  -1   76.08    2.18
  27  -1   1   78.88    2.80
  27  -1   1   79.36    2.92
 -27  -1  -1   74.13    2.53
 -27  -1  -1   80.24    2.31
 -27   1  -1   83.78    3.24
 -27   1  -1   87.10    2.94
 -27   1  -1   82.78    3.07
  27   1   1   80.19    2.99
  27   1   1   79.59    2.64
 -27   1  -1   80.21    2.29
  27   1   1   88.04    2.78
 -29  -1  -1   22.00    1.10
 -29  -1  -1   22.46    1.00
  29  -1   1   23.91    1.58
  29  -1   1   21.16    1.44
 -29  -1  -1   21.99    1.32
  29   1   1   19.73    1.53
 -29   1  -1   19.41    0.97
  29   1   1   20.36    1.30
 -29   1  -1   17.70    1.71
 -29   1  -1   19.91    1.61
  29   1   1   20.78    1.24
 -29   1  -1   22.94    1.49
 -31  -1  -1   73.10    2.59
 -31  -1  -1   75.64    2.12
  31  -1   1   78.95    2.90
 -31  -1  -1   77.32    2.32
  31  -1   1   69.77    2.99
 -31   1  -1   75.68    2.23
 -31   1  -1   78.86    3.09
  31   1   1   74.83    3.01
 -31   1  -1   77.24    2.84
  31   1   1   84.30    2.80
 -31   1  -1   77.55    3.26
  31   1   1   71.69    2.68
 -33  -1  -1   11.06    0.76
  33  -1   1   11.69    1.38
  33  -1   1   12.17    1.38
 -33  -1  -1   12.63    1.18
 -33  -1  -1   12.44    0.92
  33   1   1   18.66    1.52
 -33   1  -1   16.01    1.73
 -33   1  -1   18.20    0.97
  33   1   1   19.40    1.37
 -33   1  -1   19.71    1.66
 -33   1  -1   17.43    1.44
  35  -1   1   97.38    3.78
 -35  -1  -1  102.79    2.90
  35  -1   1   97.75    3.53
  35   1   1   99.75    3.76
 -35   1  -1  101.21    3.48
 -35   1  -1   98.10    2.80
 -35   1  -1   98.21    3.72
 -35   1  -1  105.86    4.02
  35   1   1  107.05    3.44
  37  -1   1   28.91    1.85
  37  -1   1   28.89    2.08
 -37  -1  -1   28.42    1.33
 -37   1  -1   31.66    2.26
  37   1   1   27.27    1.95
  37   1   1   30.07    1.74
  37   1   1   32.17    1.95
 -37   1  -1   29.09    1.82
 -37   1  -1   28.53    2.02
  39  -1   1   58.67    2.67
 -39  -1  -1   56.80    1.96
  39  -1   1   54.99    2.83
 -39   1  -1   49.06    2.64
  39   1   1   47.85    2.63
 -39   1  -1   48.28    2.80
 -39   1  -1   52.66    2.41
  39   1   1   56.23    2.73
  39   1   1   55.54    2.43
  41  -1   1   76.39    3.46
  41  -1   1   71.25    3.07
 -41  -1  -1   72.64    2.72
 -41   1  -1   82.89    3.17
  41   1   1   82.71    3.59
 -41   1  -1   81.63    3.74
  41   1   1   83.92    3.18
  41   1   1   84.98    3.52
  43  -1   1    1.71    0.94
  43  -1   1    2.80    0.96
  43  -1   1    1.34    0.85
 -43   1  -1    3.51    1.25
  43   1   1    2.11    0.98
  43   1   1    1.43    0.79
 -43   1  -1    2.88    0.97
  43   1   1    2.89    1.01
  45  -1   1   64.54    3.43
  45  -1   1   68.19    3.20
  45  -1   1   70.19    3.11
 -45   1  -1   70.52    3.64
  45   1   1   73.66    3.60
 -45   1  -1   76.48    3.04
  45   1   1   74.47    3.05
  45   1   1   78.18    3.53
  47  -1   1   14.11    1.66
  47  -1   1   11.15    1.69
  47  -1   1   15.37    1.82
  47   1   1    8.28    1.65
  47   1   1    8.60    1.46
  47   1   1   11.56    1.43
 -47   1  -1    9.40    1.78
 -47   1  -1   11.54    1.46
  49  -1   1   41.58    2.51
  49  -1   1   42.53    2.93
  49  -1   1   46.52    2.79
 -49   1  -1   40.27    2.25
  49   1   1   37.15    2.78
  49   1   1   36.05    2.59
  51  -1   1   23.09    2.37
  51  -1   1   27.15    2.42
  51  -1   1   19.30    2.29
  51   1   1   19.04    2.15
  51   1   1   19.89    2.35
 -51   1  -1   24.36    1.81
  53  -1   1   10.24    1.71
  53  -1   1    9.14    1.54
  53  -1   1    6.10    1.61
  53   1   1    9.35    1.75
  53   1   1    6.93    1.56
  55  -1   1   28.30    2.73
  55  -1   1   32.50    3.17
  55  -1   1   29.49    2.36
  55   1   1   22.06    2.64
  55   1   1   22.88    2.51
  57  -1   1    0.21    1.11
  57  -1   1   -0.06    1.17
  57   1   1   -0.03    0.98
  57   1   1    2.21    1.41
  59  -1   1   17.00    2.38
  59  -1   1   15.82    2.16
  59   1   1   15.00    2.23
  59   1   1   14.75    2.24
  61  -1   1    1.12    1.41
  61  -1   1    3.18    1.43
  61   1   1    1.61    1.31
  61   1   1    1.25    1.31
  62  -2  -1   15.63    2.12
  62  -2  -1   17.27    2.63
  62   2  -1   13.73    2.20
  62   2  -1   11.37    2.08
  60  -2  -1    1.22    1.13
  60  -2  -1   -0.03    1.27
  60   2  -1    1.27    1.27
  60   2  -1    1.34    1.35
  58  -2  -1   29.18    2.69
  58  -2  -1   32.54    3.23
 -58   2   1   18.32    2.11
  58   2  -1   24.08    2.72
  58   2  -1   22.32    2.62
  56  -2  -1   11.18    2.09
  56  -2  -1   14.52    1.97
 -56   2   1   16.78    2.00
  56   2  -1   18.75    2.33
  56   2  -1   16.99    2.31
  54  -2  -1   26.19    2.81
  54  -2  -1   19.96    2.18
  54  -2  -1   21.05    2.24
  54   2  -1   24.11    2.65
  54   2  -1   25.50    2.67
 -54   2   1   19.82    2.58
 -54   2   1   21.57    2.19
  52  -2  -1   59.22    3.18
  52  -2  -1   63.98    3.18
  52  -2  -1   59.33    3.46
  52   2  -1   61.25    3.48
  52   2  -1   52.35    3.25
 -52   2   1   58.49    3.11
 -52   2   1   56.95    3.71
  50  -2  -1   17.63    2.15
  50  -2  -1   16.48    1.89
  50  -2  -1   15.28    1.87
  50   2  -1   13.60    1.91
  50   2  -1   18.74    2.24
 -50   2   1   18.85    2.48
 -50   2   1   17.01    2.00
  48  -2  -1   37.13    2.35
  48  -2  -1   38.53    2.77
  48  -2  -1   35.87    2.35
 -48   2   1   33.31    3.11
  48   2  -1   40.01    2.72
  48   2  -1   40.98    2.59
 -48   2   1   37.56    2.46
  46  -2  -1    4.37    1.12
  46  -2  -1    4.63    1.15
  46  -2  -1    2.45    1.09
  46   2  -1    2.27    1.16
 -46   2   1    2.41    1.14
 -46   2   1    1.21    1.12
  46   2  -1    0.62    0.99
 -46   2   1    3.09    1.31
  44  -2  -1   39.21    2.30
  44  -2  -1   39.63    2.71
  44  -2  -1   43.27    2.41
 -44   2   1   44.33    3.05
 -44   2   1   42.31    2.75
  44   2  -1   41.26    2.63
  44   2  -1   31.26    2.39
 -44   2   1   42.35    2.56
  42  -2  -1   18.02    2.06
  42  -2  -1   15.05    1.61
  42  -2  -1   16.16    1.70
 -42   2   1   10.14    1.71
  42   2  -1   15.62    1.83
 -42   2   1   13.50    1.69
  42   2  -1   13.33    1.66
 -42   2   1   17.28    2.04
  40  -2  -1   40.39    2.32
 -40  -2   1   39.07    1.60
  40  -2  -1   36.49    2.40
  40  -2  -1   43.41    2.26
 -40   2   1   35.20    2.68
  40   2  -1   35.59    2.30
 -40   2   1   31.63    1.74
 -40   2   1   38.70    2.35
 -40   2   1   35.48    2.52
  40   2  -1   30.44    2.19
  38  -2  -1   25.71    1.75
  38  -2  -1   26.06    1.83
 -38  -2   1   26.36    1.31
 -38  -2   1   28.62    2.02
  38  -2  -1   24.09    1.93
  38   2  -1   30.34    1.48
  38   2  -1   26.45    1.98
 -38   2   1   23.34    2.19
 -38   2   1   28.15    2.01
 -38   2   1   27.67    1.66
 -38   2   1   28.63    2.32
  38   2  -1   29.19    2.05
  36  -2  -1    4.04    0.88
  36  -2  -1    3.63    0.94
  36  -2  -1    5.12    1.13
 -36  -2   1    4.72    0.79
 -36  -2   1    6.32    0.77
  36   2  -1    4.45    0.72
 -36   2   1    3.60    0.81
 -36   2   1    4.08    1.17
 -36   2   1    5.29    1.37
  36   2  -1    2.90    0.95
 -36   2   1    3.29    1.02
  36   2  -1    2.92    0.94
 -34  -2   1   96.58    2.95
  34  -2  -1   94.85    3.30
  34  -2  -1   88.01    3.58
  34  -2  -1   96.52    3.49
 -34  -2   1   97.37    2.83
  34   2  -1   87.82    3.38
 -34   2   1   87.76    2.99
  34   2  -1   87.50    2.71
 -34   2   1   92.20    3.97
 -34   2   1   87.86    3.44
 -34   2   1   90.59    3.68
  34   2  -1   83.81    3.33
  32  -2  -1   13.20    1.55
 -32  -2   1   14.88    1.11
 -32  -2   1   14.76    1.02
 -32  -2   1   15.80    1.30
  32  -2  -1   12.35    1.37
  32  -2  -1   13.84    1.30
  32   2  -1   17.17    1.58
  32   2  -1   17.40    1.67
 -32   2   1   17.46    2.01
 -32   2   1   16.86    1.66
 -32   2   1   16.37    1.26
 -32   2   1   19.27    1.90
  32   2  -1   17.22    1.06
 -30  -2   1  142.12    4.16
  30  -2  -1  131.40    4.49
  30  -2  -1  141.64    4.16
 -30  -2   1  140.60    3.89
 -30  -2   1  148.40    3.82
  30  -2  -1  143.31    4.37
 -30   2   1  159.30    4.81
  30   2  -1  162.13    4.81
 -30   2   1  158.71    4.42
  30   2  -1  153.15    4.05
 -30   2   1  158.61    5.06
  30   2  -1  151.86    4.49
 -30   2   1  153.40    5.22
 -30   2   1  156.49    4.87
  30   2  -1  153.47    4.75
 -28  -2   1   39.42    1.66
 -28  -2   1   37.88    1.76
  28  -2  -1   38.92    1.77
  28  -2  -1   44.21    2.22
  28  -2  -1   39.84    1.98
 -28  -2   1   41.32    1.56
 -28   2   1   41.64    2.45
  28   2  -1   41.20    1.85
  28   2  -1   42.64    2.11
 -28   2   1   46.29    2.21
  28   2  -1   47.11    2.14
 -28   2   1   43.06    1.88
  28   2  -1   45.86    1.61
 -28   2   1   45.45    2.20
 -28   2   1   47.65    2.41
 -26  -2   1   75.85    2.32
 -26  -2   1   78.35    2.52
  26  -2  -1   77.78    2.60
 -26  -2   1   77.42    2.59
  26  -2  -1   81.51    2.85
  26  -2  -1   82.83    3.04
 -26   2   1   72.04    2.45
  26   2  -1   72.15    2.11
 -26   2   1   73.58    2.97
 -26   2   1   70.95    2.98
  26   2  -1   67.16    2.58
 -26   2   1   69.42    2.76
 -26   2   1   69.79    2.75
  26   2  -1   67.83    2.39
 -24  -2   1  172.68    4.28
  24  -2  -1  183.54    4.88
  24  -2  -1  171.22    4.59
  24  -2  -1  163.51    4.89
 -24  -2   1  167.41    4.53
 -24  -2   1  178.41    4.55
 -24   2   1  153.38    4.93
  24   2  -1  166.29    4.09
  24   2  -1  170.69    4.77
 -24   2   1  173.97    5.07
 -24   2   1  163.74    4.42
  24   2  -1  176.30    4.45
 -24   2   1  167.60    4.90
  24   2  -1  162.60    4.67
 -24   2   1  162.29    4.80
  22  -2  -1   14.84    1.01
 -22  -2   1   13.85    0.82
  22  -2  -1   15.11    1.14
 -22  -2   1   12.15    0.92
  22  -2  -1   16.81    1.40
 -22  -2   1   15.06    1.06
 -22   2   1   12.49    1.27
 -22   2   1   12.08    0.91
 -22   2   1   10.49    1.16
 -22   2   1   15.22    1.48
  22   2  -1   12.15    0.71
  22   2  -1   12.91    1.24
 -22   2   1   14.12    1.41
  22   2  -1   12.40    0.87
  22   2  -1   13.08    1.16
  20  -2  -1  446.36   10.57
 -20  -2   1  443.75    9.96
 -20  -2   1  450.26   10.29
  20  -2  -1  451.77   10.24
  20  -2  -1  448.06   10.50
 -20  -2   1  456.93    9.86
 -20  -2   1  439.07   10.18
  20   2  -1  457.68    9.87
 -20   2   1  449.14   10.60
  20   2  -1  437.69   10.47
 -20   2   1  460.34   10.68
 -20   2   1  447.65   10.71
  20   2  -1  447.79   10.43
  20   2  -1  441.99   10.12
 -20   2   1  436.59   10.18
 -20   2   1  435.03   10.78
 -18  -2   1   22.50    1.06
 -18  -2   1   22.98    0.92
 -18  -2   1   22.15    1.17
  18  -2  -1   21.79    1.04
  18  -2  -1   23.39    1.25
  18  -2  -1   23.78    1.26
 -18  -2   1   19.41    0.83
 -18   2   1   17.08    1.01
  18   2  -1   18.87    0.94
  18   2  -1   20.01    1.12
 -18   2   1   20.22    1.30
  18   2  -1   20.12    0.80
 -18   2   1   21.71    1.48
  16  -2  -1  328.01    7.46
  16  -2  -1  327.69    7.77
 -16  -2   1  323.68    7.66
 -16  -2   1  326.48    7.23
 -16  -2   1  318.14    7.45
  16  -2  -1  327.21    7.75
 -16  -2   1  330.92    7.30
 -16   2   1  305.39    7.68
 -16   2   1  304.74    7.52
  16   2  -1  306.08    7.36
 -16   2   1  316.01    7.51
  16   2  -1  305.68    7.06
 -16   2   1  301.90    7.51
  16   2  -1  315.41    6.84
 -16   2   1  311.33    7.21
  16   2  -1  309.35    7.31
 -14  -2   1   13.45    0.76
  14  -2  -1   14.51    0.93
 -14  -2   1   13.79    0.64
  14  -2  -1   13.85    0.82
 -14  -2   1   14.65    0.97
  14  -2  -1   11.64    0.88
 -14  -2   1   14.16    0.68
  14  -2  -1   14.63    0.74
 -14   2   1   13.26    1.14
  14   2  -1   13.90    0.57
  14   2  -1   14.32    0.84
 -14   2   1   14.17    1.04
  14   2  -1   14.86    0.73
 -14   2   1   12.96    0.83
 -14   2   1   13.11    0.98
  14   2  -1   12.75    0.86
 -14   2   1   15.24    1.04
 -12  -2   1   33.36    1.04
  12  -2  -1   32.31    1.21
  12  -2  -1   30.22    1.24
  12  -2  -1   33.65    1.08
 -12  -2   1   34.03    1.06
 -12  -2   1   34.42    1.41
  12  -2  -1   32.83    1.10
  12  -2  -1   29.93    1.28
 -12  -2   1   33.63    1.15
 -12   2   1   35.34    1.43
  12   2  -1   34.24    1.12
  12   2  -1   33.49    1.30
 -12   2   1   34.14    1.42
 -12   2   1   31.10    1.51
  12   2  -1   34.31    1.25
  12   2  -1   33.69    0.92
 -12   2   1   31.38    1.38
 -12   2   1   34.11    1.28
  10  -2  -1   49.35    1.48
  10  -2  -1   49.84    1.58
 -10  -2   1   53.27    1.78
  10  -2  -1   50.42    1.61
 -10  -2   1   50.89    1.42
 -10  -2   1   48.40    1.58
  10  -2  -1   51.23    1.35
 -10  -2   1   49.77    1.49
  10  -2  -1   49.06    1.66
 -10  -2   1   49.35    1.39
 -10   2   1   68.64    2.13
  10   2  -1   71.67    2.04
 -10   2   1   70.73    2.16
 -10   2   1   70.91    2.31
  10   2  -1   69.15    1.85
 -10   2   1   67.01    1.98
 -10   2   1   65.52    2.10
  10   2  -1   71.34    1.94
   8  -2  -1    1.61    0.37
   8  -2  -1    1.99    0.39
   8  -2  -1    1.10    0.37
   8  -2  -1    0.99    0.36
  -8  -2   1    1.67    0.28
  -8  -2   1    1.60    0.48
  -8  -2   1    1.15    0.41
  -8  -2   1    1.53    0.30
  -8  -2   1    1.22    0.31
  -8  -2   1    1.41    0.32
   8  -2  -1    1.52    0.22
  -8   2   1   -0.01    0.38
   8   2  -1   -0.17    0.22
  -8   2   1    0.80    0.38
   8   2  -1    0.44    0.24
  -8   2   1    0.15    0.43
   8   2  -1    0.14    0.31
  -8   2   1    0.31    0.39
  -8   2   1    0.59    0.37
   6  -2  -1  187.68    4.46
  -6  -2   1  191.09    4.40
   6  -2  -1  187.68    4.08
  -6  -2   1  192.81    4.20
  -6  -2   1  194.68    4.68
   6  -2  -1  182.64    4.47
   6  -2  -1  188.11    4.41
  -6  -2   1  184.92    4.56
  -6  -2   1  194.14    4.37
  -6  -2   1  193.45    4.33
   6  -2  -1  185.34    4.51
   6   2  -1  203.07    4.65
  -6   2   1  206.91    4.82
  -6   2   1  199.59    4.73
  -6   2   1  192.66    4.73
   6   2  -1  207.05    4.47
   6   2  -1  207.20    4.58
  -6   2   1  189.55    4.70
  -6   2   1  193.41    4.86
  -4  -2   1    1.74    0.33
   4  -2  -1    2.18    0.44
  -4  -2   1    1.27    0.25
   4  -2  -1    1.21    0.37
   4  -2  -1    1.37    0.32
  -4  -2   1    1.70    0.22
  -4  -2   1    2.03    0.46
   4  -2  -1    1.93    0.40
  -4  -2   1    2.29    0.56
  -4  -2   1    1.49    0.33
  -4  -2   1    1.16    0.34
  -4   2   1    1.43    0.38
   4   2  -1    2.14    0.32
   4   2  -1    1.81    0.19
  -4   2   1    1.92    0.40
  -4   2   1    1.91    0.39
  -4   2   1    1.28    0.32
  -4   2   1    1.59    0.41
   4   2  -1    2.05    0.34
  -2  -2   1  205.23    4.62
   2  -2  -1  212.46    4.90
  -2  -2   1  221.07    4.86
  -2  -2   1  201.89    4.73
  -2  -2   1  218.71    4.91
   2  -2  -1  206.68    4.78
  -2  -2   1  215.17    5.09
   2  -2  -1  208.51    4.94
   2  -2  -1  212.98    4.93
   2  -2  -1  215.25    4.98
  -2  -2   1  215.12    4.85
  -2  -2   1  211.49    5.07
  -2   2   1  199.88    4.36
   2   2  -1  193.21    4.40
  -2   2   1  184.55    4.44
  -2   2   1  189.90    4.50
   2   2  -1  186.41    4.31
  -2   2   1  185.86    4.33
   0  -2   1   13.37    0.83
   0  -2   1   13.39    0.69
   0  -2   1   14.06    0.79
   0  -2  -1   13.02    0.64
   0  -2  -1   12.63    0.69
   0  -2   1   11.89    0.60
   0  -2   1   12.30    0.69
   0  -2  -1   13.69    0.80
   0  -2  -1   12.74    0.50
   0   2   1    5.01    0.44
   0   2   1    3.66    0.46
   0   2  -1    4.11    0.36
   0   2   1    3.87    0.32
   0   2  -1    3.33    0.40
   0   2   1    4.68    0.37
   0   2  -1    3.41    0.40
   0   2  -1    3.68    0.51
   0   2  -1    4.31    0.46
  -2  -2  -1   52.56    1.66
   2  -2   1   52.74    1.62
   2  -2   1   54.18    1.77
   2  -2   1   54.32    1.55
   2  -2   1   51.53    1.59
   2  -2   1   55.31    1.29
  -2  -2  -1   54.37    1.60
  -2  -2  -1   53.17    1.52
   2  -2   1   50.23    1.57
   2   2   1   45.45    1.12
   2   2   1   47.41    1.15
   2   2   1   47.37    1.23
  -2   2  -1   45.74    1.22
   2   2   1   42.50    1.38
  -2   2  -1   45.19    1.45
  -2   2  -1   46.98    1.43
  -2   2  -1   44.12    1.37
  -2   2  -1   43.76    1.38
  -2   2  -1   46.02    1.45
   4  -2   1   40.66    1.46
   4  -2   1   41.94    1.37
   4  -2   1   40.15    1.37
   4  -2   1   39.38    1.31
   4  -2   1   38.01    1.29
  -4  -2  -1   37.26    1.27
   4  -2   1   40.45    1.12
  -4  -2  -1   42.13    1.44
  -4  -2  -1   36.98    1.22
  -4   2  -1   66.74    1.88
   4   2   1   64.56    1.55
  -4   2  -1   67.47    1.65
  -4   2  -1   65.02    1.85
  -4   2  -1   62.00    1.82
   6  -2   1   43.99    1.30
   6  -2   1   40.86    1.32
   6  -2   1   43.07    1.47
  -6  -2  -1   42.65    1.38
  -6  -2  -1   44.69    1.50
   6  -2   1   41.66    1.50
  -6  -2  -1   41.33    1.32
   6  -2   1   40.09    1.44
   6  -2   1   43.12    1.49
  -6   2  -1   36.91    1.28
  -6   2  -1   40.25    1.32
  -6   2  -1   38.13    1.32
   6   2   1   36.32    0.91
  -6   2  -1   37.27    1.39
   8  -2   1  355.92    7.90
   8  -2   1  367.33    8.21
  -8  -2  -1  357.91    8.01
  -8  -2  -1  347.43    8.13
  -8  -2  -1  353.98    7.98
   8  -2   1  346.92    8.15
   8  -2   1  354.41    8.18
   8  -2   1  361.46    8.02
   8  -2   1  355.81    8.17
  -8   2  -1  382.10    8.97
  -8   2  -1  407.30    8.91
   8   2   1  380.08    8.38
  -8   2  -1  393.49    8.88
  -8   2  -1  407.11    8.91
  10  -2   1   32.81    1.05
 -10  -2  -1   32.18    1.29
  10  -2   1   32.79    1.26
 -10  -2  -1   30.02    1.18
  10  -2   1   30.67    1.34
  10  -2   1   31.80    1.29
  10  -2   1   33.16    1.36
 -10  -2  -1   34.13    1.21
 -10   2  -1   32.33    1.39
  10   2   1   31.19    0.84
 -10   2  -1   30.72    1.27
 -10   2  -1   33.57    1.31
 -10   2  -1   32.87    1.30
 -12  -2  -1  583.92   12.67
  12  -2   1  557.90   12.76
  12  -2   1  549.52   12.92
 -12  -2  -1  585.14   12.81
  12  -2   1  592.88   12.85
  12  -2   1  572.24   12.40
 -12  -2  -1  576.15   12.70
 -12   2  -1  565.09   12.52
 -12   2  -1  552.96   12.15
 -12   2  -1  565.83   12.54
 -12   2  -1  563.12   12.50
  12   2   1  557.01   12.01
 -12   2  -1  551.09   12.64
 -14  -2  -1   67.27    2.02
  14  -2   1   70.91    2.24
 -14  -2  -1   66.21    2.13
  14  -2   1   69.59    2.34
  14  -2   1   69.70    1.73
  14  -2   1   68.24    2.10
 -14  -2  -1   69.32    2.12
  14   2   1   67.17    1.60
  14   2   1   64.22    1.58
 -14   2  -1   65.25    2.12
  14   2   1   65.88    1.90
 -14   2  -1   63.50    2.11
 -14   2  -1   66.27    2.28
 -14   2  -1   66.23    2.18
 -14   2  -1   64.63    1.78
  14   2   1   67.87    2.09
  14   2   1   67.92    1.75
  16  -2   1  220.17    4.86
 -16  -2  -1  223.20    5.31
 -16  -2  -1  214.47    5.05
  16  -2   1  228.54    5.72
 -16  -2  -1  216.99    5.43
 -16  -2  -1  223.83    5.41
  16  -2   1  217.68    5.57
  16  -2   1  221.36    5.34
  16   2   1  203.70    4.54
 -16   2  -1  199.31    5.27
 -16   2  -1  201.36    5.09
  16   2   1  200.40    4.83
 -16   2  -1  194.23    5.12
  16   2   1  204.79    4.70
  16   2   1  200.17    5.06
 -16   2  -1  195.40    4.64
 -16   2  -1  207.84    5.13
  18  -2   1  226.66    4.82
 -18  -2  -1  218.41    5.44
 -18  -2  -1  225.69    5.40
 -18  -2  -1  213.80    5.02
  18  -2   1  221.69    5.37
  18  -2   1  228.78    5.82
  18  -2   1  223.35    5.72
 -18   2  -1  207.76    5.67
  18   2   1  207.15    5.10
 -18   2  -1  220.89    5.63
  18   2   1  221.75    5.52
 -18   2  -1  208.14    5.49
 -18   2  -1  220.41    5.03
 -18   2  -1  219.95    5.52
  18   2   1  217.21    4.98
  18   2   1  224.17    5.25
 -20  -2  -1   81.78    2.43
  20  -2   1   82.89    2.37
  20  -2   1   78.04    2.70
 -20  -2  -1   82.54    2.47
  20  -2   1   78.56    2.76
 -20   2  -1   89.21    2.93
 -20   2  -1   86.58    2.96
  20   2   1   88.66    2.90
 -20   2  -1   90.05    2.43
  20   2   1   97.26    2.82
 -20   2  -1   93.45    3.13
  20   2   1   95.46    2.49
  20   2   1   96.49    2.68
 -20   2  -1   91.92    2.91
  22  -2   1  126.93    3.81
  22  -2   1  119.59    3.75
 -22  -2  -1  123.01    3.39
 -22   2  -1  134.18    4.10
 -22   2  -1  136.77    3.91
  22   2   1  134.00    3.61
  22   2   1  136.77    3.49
 -22   2  -1  135.17    4.16
 -22   2  -1  130.79    3.36
  22   2   1  137.67    3.96
 -22   2  -1  127.57    3.89
 -24  -2  -1    0.87    0.54
  24  -2   1    0.69    0.62
  24  -2   1    1.30    0.65
 -24   2  -1    0.53    0.72
 -24   2  -1    0.14    0.63
  24   2   1    0.99    0.34
 -24   2  -1    1.21    0.61
  24   2   1    1.00    0.40
 -24   2  -1    1.12    0.41
  24   2   1    1.60    0.47
  24   2   1    1.48    0.64
 -24   2  -1    1.19    0.76
  26  -2   1   29.20    1.73
 -26  -2  -1   30.70    1.40
 -26  -2  -1   27.90    1.28
  26  -2   1   31.47    1.73
 -26   2  -1   30.36    1.88
 -26   2  -1   34.30    1.72
  26   2   1   31.07    1.73
 -26   2  -1   29.96    1.77
 -26   2  -1   29.05    1.83
 -26   2  -1   28.22    1.20
  26   2   1   31.87    1.40
  26   2   1   31.76    1.44
  26   2   1   30.47    1.13
  28  -2   1   35.68    1.93
 -28  -2  -1   37.16    1.53
 -28  -2  -1   38.74    1.58
  28  -2   1   38.72    2.05
  28   2   1   44.45    1.78
 -28   2  -1   45.93    2.46
 -28   2  -1   44.44    1.58
 -28   2  -1   42.31    2.13
  28   2   1   43.45    1.39
 -28   2  -1   50.49    2.44
 -28   2  -1   47.79    2.13
  28   2   1   45.68    1.83
  28   2   1   42.21    2.13
 -30  -2  -1   81.47    2.51
  30  -2   1   81.29    3.17
  30  -2   1   74.07    2.98
 -30   2  -1   75.23    2.32
 -30   2  -1   74.12    3.27
 -30   2  -1   82.05    3.30
  30   2   1   78.27    3.09
  30   2   1   81.16    2.70
  30   2   1   81.18    2.64
  30   2   1   77.59    2.04
 -30   2  -1   80.19    3.10
  32  -2   1   42.10    2.17
  32  -2   1   39.48    2.23
 -32  -2  -1   40.08    1.63
  32   2   1   48.56    2.00
 -32   2  -1   49.99    2.41
 -32   2  -1   44.15    2.65
 -32   2  -1   44.26    1.64
  32   2   1   46.31    2.30
 -32   2  -1   45.18    2.56
  32   2   1   45.47    2.07
  34  -2   1   25.28    1.78
  34  -2   1   27.13    1.92
 -34  -2  -1   24.91    1.33
 -34   2  -1   27.24    2.17
  34   2   1   24.65    1.49
 -34   2  -1   27.52    2.11
  34   2   1   26.96    1.85
  34   2   1   27.42    1.92
 -34   2  -1   23.19    1.15
 -34   2  -1   26.00    1.92
  36  -2   1   87.29    3.55
 -36  -2  -1   80.94    2.63
  36  -2   1   93.46    3.50
  36   2   1   79.15    3.27
 -36   2  -1   77.59    3.43
 -36   2  -1   78.50    3.26
  36   2   1   76.71    3.28
  36   2   1   82.77    2.90
 -36   2  -1   76.47    3.54
  38  -2   1    0.47    0.75
  38  -2   1    0.06    0.80
 -38   2  -1   -0.12    0.93
 -38   2  -1    1.15    0.96
  38   2   1    2.13    0.70
  38   2   1    1.54    0.83
 -38   2  -1    0.19    1.01
  38   2   1    0.64    0.72
  40  -2   1   75.96    3.27
  40  -2   1   75.28    3.49
  40   2   1   67.29    2.69
 -40   2  -1   68.58    3.36
  40   2   1   67.70    3.17
  40   2   1   73.82    3.26
 -40   2  -1   72.78    3.59
 -40   2  -1   64.02    3.05
  42  -2   1   26.47    1.92
  42  -2   1   27.83    2.02
  42  -2   1   26.91    2.20
  42   2   1   26.85    1.78
 -42   2  -1   26.17    2.57
  42   2   1   28.11    2.11
 -42   2  -1   26.47    2.30
 -42   2  -1   31.46    2.21
  42   2   1   30.40    2.51
  44  -2   1   59.20    2.95
  44  -2   1   56.47    2.83
  44  -2   1   58.67    3.13
 -44   2  -1   55.37    2.82
  44   2   1   58.53    2.54
 -44   2  -1   48.87    3.03
  44   2   1   54.30    2.90
  44   2   1   54.21    2.96
  46  -2   1   46.04    2.60
  46  -2   1   47.09    2.68
  46  -2   1   40.32    2.70
  46   2   1   43.75    2.79
 -46   2  -1   47.02    3.12
 -46   2  -1   48.16    2.68
  46   2   1   51.48    2.92
  48  -2   1   14.61    1.98
  48  -2   1   11.67    1.67
  48  -2   1   11.34    1.64
 -48   2  -1   11.39    1.61
  48   2   1   14.09    1.96
 -48   2  -1   13.99    2.04
  48   2   1   10.44    1.70
  50  -2   1   36.52    2.50
  50  -2   1   38.71    2.62
  50  -2   1   38.13    2.84
  50   2   1   31.70    2.45
 -50   2  -1   35.61    2.38
 -50   2  -1   35.20    2.91
  50   2   1   32.12    2.54
  52  -2   1   -0.77    0.89
  52  -2   1    0.00    0.89
  52  -2   1    0.48    0.93
  52   2   1    1.19    1.15
  52   2   1    2.28    1.18
 -52   2  -1    2.40    1.16
 -52   2  -1    1.59    1.41
  54  -2   1   15.34    2.03
  54  -2   1   12.56    1.83
  54  -2   1   15.26    2.20
  54   2   1   23.91    2.66
 -54   2  -1   18.73    1.98
  54   2   1   17.95    2.19
  56  -2   1    7.67    1.84
  56  -2   1    9.64    1.79
  56  -2   1    9.53    1.68
  56   2   1    5.64    1.57
  56   2   1    5.82    1.69
  58  -2   1   14.18    2.12
  58  -2   1    9.52    1.76
  58  -2   1    7.02    1.71
  58   2   1   12.39    1.96
  58   2   1   11.96    2.15
  60  -2   1    7.07    1.81
  60  -2   1    6.22    1.60
  60   2   1    5.58    1.60
  60   2   1    6.85    1.79
  62  -2   1    0.66    1.29
  62  -2   1    0.03    1.07
  62   2   1    0.11    1.22
  62   2   1   -0.65    1.04
  61  -3  -1    9.30    1.99
  61   3  -1    9.02    1.91
  61   3  -1   10.02    2.10
 -61   3   1    6.92    1.71
  59  -3  -1    4.92    1.74
 -59   3   1    7.35    1.74
  59   3  -1    5.01    1.69
  59   3  -1    7.75    1.81
 -59   3   1    5.55    2.02
  57  -3  -1   23.05    2.82
  57  -3  -1   25.56    2.44
  57  -3  -1   23.22    2.42
 -57   3   1   16.98    2.67
  57   3  -1   19.32    2.35
 -57   3   1   18.33    2.31
  57   3  -1   22.95    2.73
  55  -3  -1   -0.38    1.05
  55  -3  -1   -0.97    0.91
  55  -3  -1    1.06    1.33
 -55   3   1    0.78    1.29
 -55   3   1    1.47    1.51
  55   3  -1    0.71    1.17
  55   3  -1    0.76    1.24
  53  -3  -1   36.64    2.55
  53  -3  -1   39.47    2.73
  53  -3  -1   39.07    3.04
 -53   3   1   29.26    2.70
  53   3  -1   33.80    2.74
  53   3  -1   37.76    3.21
 -53   3   1   33.89    3.32
  51  -3  -1    4.54    1.26
  51  -3  -1    5.11    1.21
  51  -3  -1    5.54    1.61
  51   3  -1    2.76    1.22
 -51   3   1    3.69    1.46
  51   3  -1    2.95    1.27
 -51   3   1    3.60    1.73
  49  -3  -1   28.80    2.13
  49  -3  -1   22.82    2.44
  49  -3  -1   21.71    2.29
  49   3  -1   23.95    2.51
  49   3  -1   26.82    2.58
 -49   3   1   24.97    2.79
 -49   3   1   24.74    2.48
  47  -3  -1   18.08    2.03
  47  -3  -1   18.08    2.20
  47  -3  -1   17.68    1.84
 -47   3   1   17.79    2.08
  47   3  -1   17.38    2.04
  47   3  -1   16.05    2.09
 -47   3   1   19.34    2.38
 -47   3   1   20.94    2.70
  45  -3  -1    8.48    1.36
  45  -3  -1    8.02    1.57
  45  -3  -1    8.72    1.47
 -45   3   1    8.11    1.90
 -45   3   1    8.63    1.72
  45   3  -1    9.37    1.62
 -45   3   1    8.94    1.66
  45   3  -1    7.11    1.34
  43  -3  -1   53.59    2.85
  43  -3  -1   56.68    2.66
  43  -3  -1   51.65    3.04
 -43   3   1   47.72    3.22
  43   3  -1   53.37    2.84
 -43   3   1   45.75    2.81
 -43   3   1   46.37    3.11
  43   3  -1   44.88    2.67
  41  -3  -1    3.59    1.15
  41  -3  -1    1.65    0.81
  41  -3  -1    0.84    0.88
  41   3  -1    1.29    0.95
 -41   3   1    1.57    1.12
 -41   3   1   -0.76    0.98
 -41   3   1    1.10    1.20
  41   3  -1    1.89    0.96
 -39  -3   1   76.25    2.77
  39  -3  -1   75.40    2.77
  39  -3  -1   75.45    3.00
  39  -3  -1   82.91    3.63
  39  -3  -1   74.40    3.28
 -39   3   1   68.26    3.50
  39   3  -1   64.47    3.15
 -39   3   1   71.86    2.76
  39   3  -1   67.01    3.10
 -39   3   1   63.77    3.57
 -39   3   1   67.51    3.31
  37  -3  -1    3.88    1.17
  37  -3  -1    7.51    1.25
  37  -3  -1    5.56    0.93
  37  -3  -1    4.24    0.94
 -37  -3   1    6.24    0.99
 -37   3   1    7.82    1.13
  37   3  -1    6.76    1.28
 -37   3   1    8.53    1.45
 -37   3   1    8.89    1.58
 -37   3   1    7.89    1.62
  37   3  -1    8.03    1.34
 -35  -3   1   41.21    1.95
  35  -3  -1   42.61    1.92
  35  -3  -1   44.89    2.36
  35  -3  -1   39.26    2.34
  35  -3  -1   40.00    2.02
  35   3  -1   48.71    2.56
 -35   3   1   51.32    2.92
 -35   3   1   45.05    2.55
 -35   3   1   48.49    3.03
  35   3  -1   49.26    2.45
 -35   3   1   50.32    2.21
  33  -3  -1   57.74    2.29
 -33  -3   1   57.56    2.33
  33  -3  -1   56.70    2.34
  33  -3  -1   57.25    2.80
  33  -3  -1   57.74    2.65
 -33   3   1   57.66    3.07
  33   3  -1   58.12    2.62
 -33   3   1   59.54    2.39
 -33   3   1   55.17    2.85
  33   3  -1   59.00    2.71
  33   3  -1   58.79    1.93
 -33   3   1   58.65    3.07
  31  -3  -1   67.08    2.93
  31  -3  -1   63.11    2.37
 -31  -3   1   62.87    2.44
  31  -3  -1   64.15    2.76
  31  -3  -1   60.90    2.38
 -31   3   1   69.04    3.11
 -31   3   1   73.99    3.35
  31   3  -1   70.97    2.84
 -31   3   1   66.94    2.99
  31   3  -1   65.78    2.90
  31   3  -1   67.03    2.11
 -31   3   1   69.34    2.58
 -31   3   1   75.53    3.38
  29  -3  -1   85.85    3.22
 -29  -3   1   82.39    2.04
  29  -3  -1   86.08    2.86
 -29  -3   1   87.10    2.94
  29  -3  -1   88.09    2.83
  29  -3  -1   83.57    3.28
  29   3  -1   78.16    2.26
  29   3  -1   76.25    2.90
 -29   3   1   82.79    3.46
 -29   3   1   73.42    3.10
  29   3  -1   73.52    2.60
 -29   3   1   81.44    3.42
 -29   3   1   80.17    3.26
 -29   3   1   77.05    2.68
  29   3  -1   76.38    3.01
  27  -3  -1   15.86    1.18
 -27  -3   1   15.15    0.66
 -27  -3   1   18.23    1.06
  27  -3  -1   16.63    1.13
  27  -3  -1   16.32    1.49
  27  -3  -1   14.42    1.42
 -27  -3   1   15.82    0.63
 -27  -3   1   16.74    1.31
 -27   3   1   14.38    1.57
 -27   3   1   15.90    1.18
 -27   3   1   17.37    1.66
  27   3  -1   15.88    1.44
 -27   3   1   12.16    1.50
 -27   3   1   15.03    1.47
  27   3  -1   17.19    1.30
  27   3  -1   16.62    0.86
  27   3  -1   18.25    1.12
 -25  -3   1  132.60    3.46
 -25  -3   1  139.81    3.98
 -25  -3   1  131.51    3.13
  25  -3  -1  137.42    3.76
  25  -3  -1  136.06    4.19
 -25  -3   1  135.80    3.65
  25  -3  -1  135.90    4.22
  25  -3  -1  136.88    3.90
  25   3  -1  133.04    3.68
  25   3  -1  136.90    3.38
 -25   3   1  129.60    4.49
 -25   3   1  133.78    3.82
 -25   3   1  132.72    4.25
  25   3  -1  134.16    4.14
 -25   3   1  129.90    4.31
  25   3  -1  137.10    4.03
 -25   3   1  135.71    4.39
 -23  -3   1   25.91    1.46
 -23  -3   1   23.30    1.04
 -23  -3   1   23.63    0.79
 -23  -3   1   23.48    1.12
  23  -3  -1   23.05    1.44
  23  -3  -1   26.10    1.35
  23  -3  -1   23.88    1.45
  23  -3  -1   24.14    1.22
 -23   3   1   18.33    1.52
 -23   3   1   18.06    1.65
 -23   3   1   21.80    1.71
 -23   3   1   20.45    1.24
  23   3  -1   19.90    1.41
  23   3  -1   22.26    1.29
  23   3  -1   19.62    0.87
 -23   3   1   18.22    1.46
  23   3  -1   17.91    1.02
  21  -3  -1  116.55    3.15
  21  -3  -1  112.69    3.34
  21  -3  -1  112.08    3.58
  21  -3  -1  121.31    3.58
 -21  -3   1  113.77    2.99
 -21  -3   1  113.16    3.08
 -21  -3   1  110.40    2.69
 -21  -3   1  120.72    3.52
 -21   3   1  103.38    3.45
  21   3  -1   99.90    2.87
 -21   3   1  105.42    3.68
 -21   3   1  103.31    3.07
  21   3  -1  104.32    3.17
  21   3  -1  104.48    3.31
  21   3  -1  108.06    2.66
 -21   3   1  105.38    3.44
 -21   3   1  103.52    3.51
  19  -3  -1  152.77    4.19
  19  -3  -1  147.42    4.25
 -19  -3   1  140.37    3.40
  19  -3  -1  155.94    3.81
  19  -3  -1  152.63    4.06
 -19  -3   1  153.17    4.22
 -19  -3   1  151.24    3.71
 -19  -3   1  140.03    3.73
 -19   3   1  122.76    3.79
  19   3  -1  125.03    3.03
  19   3  -1  122.91    3.66
 -19   3   1  130.51    3.87
 -19   3   1  126.99    3.88
 -19   3   1  122.86    3.48
  19   3  -1  128.78    3.56
  19   3  -1  123.95    3.27
 -19   3   1  126.95    4.08
  17  -3  -1   36.04    1.60
 -17  -3   1   37.71    1.33
  17  -3  -1   38.91    1.58
  17  -3  -1   40.31    1.35
  17  -3  -1   39.41    1.32
 -17  -3   1   35.97    1.08
  17  -3  -1   36.29    1.69
 -17  -3   1   38.34    1.74
 -17  -3   1   38.41    1.33
  17   3  -1   30.25    1.44
  17   3  -1   29.21    1.16
 -17   3   1   33.30    1.63
 -17   3   1   32.67    1.41
 -17   3   1   32.36    1.79
  17   3  -1   32.00    1.34
 -17   3   1   30.73    1.63
  17   3  -1   31.62    1.00
 -17   3   1   30.55    1.59
  15  -3  -1  225.84    5.42
  15  -3  -1  216.21    5.39
 -15  -3   1  221.67    5.61
  15  -3  -1  212.04    4.97
 -15  -3   1  204.67    5.07
  15  -3  -1  216.29    5.13
 -15  -3   1  219.93    5.11
  15  -3  -1  215.83    5.54
 -15  -3   1  208.29    4.81
 -15   3   1  192.88    4.99
  15   3  -1  204.04    4.95
 -15   3   1  202.07    5.26
  15   3  -1  202.87    4.77
  15   3  -1  200.91    5.09
 -15   3   1  191.85    5.45
 -15   3   1  208.14    5.31
 -15   3   1  204.03    5.32
  15   3  -1  195.44    4.52
  13  -3  -1    5.94    0.70
 -13  -3   1    6.36    0.45
  13  -3  -1    5.82    0.72
 -13  -3   1    7.52    0.93
 -13  -3   1    6.61    0.61
 -13  -3   1    6.21    0.57
  13  -3  -1    6.18    0.62
  13  -3  -1    6.57    0.68
  13  -3  -1    7.51    0.48
 -13   3   1    6.91    0.73
 -13   3   1    5.49    0.71
  13   3  -1    6.58    0.55
 -13   3   1    6.95    0.86
  13   3  -1    8.89    0.83
 -13   3   1    8.37    1.03
 -13   3   1    7.10    0.89
  13   3  -1    6.77    0.62
  11  -3  -1  237.29    5.13
  11  -3  -1  226.59    5.65
  11  -3  -1  231.92    5.76
 -11  -3   1  228.64    5.40
 -11  -3   1  233.49    5.46
 -11  -3   1  234.40    5.32
 -11  -3   1  235.30    5.89
  11  -3  -1  234.25    5.57
  11  -3  -1  233.04    5.52
 -11  -3   1  227.10    5.22
 -11   3   1  290.54    6.96
 -11   3   1  292.78    7.03
  11   3  -1  290.86    6.78
  11   3  -1  293.85    6.61
 -11   3   1  279.38    7.13
 -11   3   1  284.20    6.82
  11   3  -1  284.05    6.56
 -11   3   1  294.09    6.96
  -9  -3   1   12.24    0.61
  -9  -3   1   11.81    0.74
   9  -3  -1   13.30    0.87
  -9  -3   1   11.76    0.62
   9  -3  -1   12.29    0.40
   9  -3  -1   12.85    0.80
  -9  -3   1   12.93    1.00
  -9  -3   1   12.34    0.70
   9  -3  -1   10.06    0.71
   9  -3  -1   12.58    0.40
   9  -3  -1   13.02    0.87
   9   3  -1   16.05    0.71
  -9   3   1   15.76    0.97
  -9   3   1   14.81    1.02
   9   3  -1   16.03    0.84
  -9   3   1   14.84    0.90
  -9   3   1   15.37    1.10
   9   3  -1   15.90    0.75
   7  -3  -1  274.63    6.50
  -7  -3   1  273.19    6.68
   7  -3  -1  274.22    6.27
  -7  -3   1  273.98    6.15
  -7  -3   1  276.85    6.28
  -7  -3   1  271.29    6.33
   7  -3  -1  266.27    6.47
  -7  -3   1  277.81    6.06
   7  -3  -1  267.56    6.42
  -7   3   1  273.00    6.48
  -7   3   1  279.42    6.46
   7   3  -1  279.07    6.06
   7   3  -1  278.21    6.32
   7   3  -1  279.80    6.26
  -7   3   1  276.88    6.59
  -7   3   1  258.22    6.43
  -7   3   1  267.02    6.61
  -5  -3   1  129.26    3.07
  -5  -3   1  126.99    3.56
   5  -3  -1  124.72    3.37
  -5  -3   1  126.63    3.28
   5  -3  -1  126.08    3.38
  -5  -3   1  125.92    3.13
   5  -3  -1  124.55    3.13
  -5  -3   1  133.57    3.55
  -5  -3   1  126.61    2.99
  -5  -3   1  130.53    3.24
   5  -3  -1  129.50    3.38
   5   3  -1  136.16    2.99
  -5   3   1  135.32    3.43
   5   3  -1  134.77    3.29
  -5   3   1  131.14    3.57
  -5   3   1  128.06    3.53
  -5   3   1  133.09    3.41
   5   3  -1  137.12    3.31
  -3  -3   1  238.76    5.43
   3  -3  -1  242.49    5.43
  -3  -3   1  236.41    5.87
  -3  -3   1  226.87    5.56
  -3  -3   1  241.12    5.89
   3  -3  -1  233.48    5.69
  -3  -3   1  245.14    5.65
  -3  -3   1  233.37    5.51
   3  -3  -1  237.57    5.73
   3  -3  -1  234.12    5.65
   3  -3  -1  238.07    5.60
  -3  -3   1  245.04    5.32
  -3   3   1  241.58    5.90
   3   3  -1  248.25    5.60
   3   3  -1  256.29    5.73
  -3   3   1  250.53    5.71
  -3   3   1  237.12    5.83
  -3   3   1  242.75    5.70
   1  -3  -1  226.75    5.70
  -1  -3   1  232.00    5.44
  -1  -3   1  238.40    5.30
   1  -3  -1  234.90    5.65
  -1  -3   1  240.74    5.53
  -1  -3   1  234.00    5.79
  -1  -3   1  238.40    5.62
   1  -3  -1  238.64    5.35
  -1  -3   1  242.43    6.24
  -1  -3   1  237.73    5.86
   1  -3  -1  228.26    5.56
   1  -3  -1  233.36    5.52
  -1   3   1  198.39    4.64
   1   3  -1  197.41    4.71
  -1   3   1  197.58    4.91
   1   3  -1  188.53    4.86
  -1   3   1  198.22    4.63
   1   3  -1  202.22    4.56
   1   3  -1  208.90    4.74
  -1   3   1  204.93    4.79
  -1   3   1  197.60    4.33
   1   3  -1  197.58    4.77
   1  -3   1   11.18    0.71
   1  -3   1   12.43    0.96
   1  -3   1   10.58    0.34
   1  -3   1   10.94    0.95
   1  -3   1    9.70    0.71
   1  -3   1    9.42    0.74
  -1  -3  -1   14.63    0.88
  -1  -3  -1   13.19    0.95
  -1  -3  -1   15.87    0.80
  -1   3  -1   11.18    0.78
  -1   3  -1   10.88    0.80
  -1   3  -1   10.91    0.81
  -1   3  -1   11.69    0.73
   1   3   1   12.48    0.60
  -1   3  -1   11.66    0.58
  -1   3  -1   11.39    0.75
   1   3   1   12.38    0.52
   1   3   1   12.13    0.71
   1   3   1   12.03    0.61
  -3  -3  -1  277.85    6.32
   3  -3   1  274.97    6.39
   3  -3   1  271.12    6.45
   3  -3   1  267.40    6.50
   3  -3   1  282.13    6.73
   3  -3   1  274.40    6.46
  -3  -3  -1  267.62    6.43
  -3  -3  -1  269.48    6.59
   3  -3   1  279.04    5.96
  -3   3  -1  299.84    6.57
   3   3   1  300.24    6.98
  -3   3  -1  297.42    6.87
   3   3   1  299.37    6.66
  -3   3  -1  295.56    6.88
  -3   3  -1  295.80    6.98
  -3   3  -1  286.08    6.95
   3   3   1  298.11    6.54
   3   3   1  304.66    6.61
   3   3   1  294.13    6.56
   5  -3   1   18.21    1.14
   5  -3   1   19.68    1.02
   5  -3   1   18.97    0.70
  -5  -3  -1   20.35    1.17
  -5  -3  -1   20.16    0.99
   5  -3   1   18.03    0.98
  -5  -3  -1   18.58    0.89
  -5   3  -1   21.54    1.09
   5   3   1   20.83    0.84
  -5   3  -1   20.70    0.75
  -5   3  -1   20.15    0.99
   5   3   1   19.76    0.73
  -5   3  -1   20.60    0.98
  -5   3  -1   18.55    1.06
   5   3   1   19.62    0.74
   7  -3   1  331.13    7.91
  -7  -3  -1  336.93    7.72
  -7  -3  -1  350.87    7.87
   7  -3   1  341.94    8.12
  -7  -3  -1  334.08    8.04
   7  -3   1  339.27    7.83
   7  -3   1  343.91    7.58
   7   3   1  297.66    6.56
  -7   3  -1  306.85    7.03
  -7   3  -1  295.24    7.13
  -7   3  -1  295.87    7.06
  -7   3  -1  298.79    7.02
   9  -3   1  176.49    4.73
   9  -3   1  183.68    4.54
  -9  -3  -1  185.85    4.63
  -9  -3  -1  191.98    4.89
   9  -3   1  192.98    4.48
   9  -3   1  192.44    4.89
  -9  -3  -1  184.35    4.54
  -9   3  -1  173.72    4.56
  -9   3  -1  178.27    4.71
   9   3   1  183.07    4.05
  -9   3  -1  181.89    4.59
  -9   3  -1  188.33    4.67
  11  -3   1  158.37    4.32
 -11  -3  -1  159.03    4.33
  11  -3   1  165.82    4.06
 -11  -3  -1  160.57    4.11
  11  -3   1  161.75    3.98
 -11  -3  -1  162.24    4.05
 -11   3  -1  143.72    3.83
 -11   3  -1  138.55    3.85
 -11   3  -1  139.00    3.96
 -11   3  -1  151.94    3.87
  11   3   1  139.35    3.22
  13  -3   1  197.90    5.11
  13  -3   1  200.76    4.96
 -13  -3  -1  200.13    4.90
 -13  -3  -1  197.60    5.15
  13  -3   1  192.82    5.16
  13  -3   1  202.88    4.73
 -13  -3  -1  196.09    4.91
 -13   3  -1  182.85    5.10
 -13   3  -1  199.93    5.00
 -13   3  -1  196.61    4.97
 -13   3  -1  190.31    4.64
 -13   3  -1  195.82    5.02
  13   3   1  190.81    4.31
 -15  -3  -1    1.28    0.48
 -15  -3  -1    1.31    0.47
 -15  -3  -1    2.60    0.70
  15  -3   1    2.30    0.58
  15  -3   1    2.20    0.56
  15  -3   1    1.81    0.38
  15  -3   1    1.55    0.63
  15   3   1    0.92    0.23
 -15   3  -1    0.66    0.37
  15   3   1    0.86    0.16
 -15   3  -1    0.86    0.52
  15   3   1    0.69    0.38
 -15   3  -1    0.99    0.58
 -15   3  -1    0.90    0.54
 -15   3  -1    0.69    0.51
  17  -3   1  211.56    5.72
 -17  -3  -1  213.35    5.37
 -17  -3  -1  212.91    5.30
 -17  -3  -1  224.93    5.59
  17  -3   1  214.83    4.98
  17  -3   1  212.56    5.53
 -17   3  -1  198.51    5.26
  17   3   1  195.53    4.56
 -17   3  -1  196.51    5.23
  17   3   1  203.57    5.09
 -17   3  -1  195.34    5.20
  17   3   1  193.83    4.42
 -17   3  -1  199.50    5.43
 -17   3  -1  201.26    4.79
  19  -3   1   36.26    1.70
  19  -3   1   38.54    1.17
 -19  -3  -1   36.63    1.59
 -19  -3  -1   38.77    1.72
  19  -3   1   33.92    1.80
 -19  -3  -1   38.02    1.52
  19   3   1   32.54    1.03
 -19   3  -1   33.57    1.71
 -19   3  -1   32.62    1.81
 -19   3  -1   34.34    1.65
 -19   3  -1   32.93    1.27
  19   3   1   32.55    1.14
 -19   3  -1   36.04    1.68
  19   3   1   34.98    1.53
  19   3   1   32.26    1.29
  21  -3   1  117.07    2.76
 -21  -3  -1  113.80    3.26
 -21  -3  -1  110.89    3.42
  21  -3   1  118.60    3.62
 -21   3  -1  117.16    3.68
 -21   3  -1  123.50    3.71
  21   3   1  121.89    3.58
 -21   3  -1  114.09    3.84
 -21   3  -1  124.27    3.66
  21   3   1  113.37    3.03
 -21   3  -1  113.24    3.09
  21   3   1  114.71    3.19
  21   3   1  117.40    2.93
 -23  -3  -1   44.57    1.92
  23  -3   1   44.05    2.12
  23  -3   1   41.78    1.98
 -23  -3  -1   43.72    1.70
 -23   3  -1   52.72    2.27
 -23   3  -1   50.54    2.41
  23   3   1   50.06    1.59
 -23   3  -1   48.41    1.70
  23   3   1   50.90    1.80
 -23   3  -1   52.30    2.20
  23   3   1   52.71    2.13
  23   3   1   46.67    1.65
 -23   3  -1   50.48    2.18
 -25  -3  -1   32.74    1.52
  25  -3   1   29.59    1.83
 -25  -3  -1   34.78    1.65
  25  -3   1   31.67    1.74
  25   3   1   38.91    1.50
  25   3   1   38.71    1.60
  25   3   1   39.72    1.92
 -25   3  -1   39.09    1.49
  25   3   1   40.03    1.45
 -25   3  -1   39.18    2.02
 -25   3  -1   36.14    1.91
 -25   3  -1   39.28    2.10
  25   3   1   39.95    1.96
 -25   3  -1   37.13    2.20
  27  -3   1   93.62    3.40
 -27  -3  -1   93.99    3.00
  27  -3   1   85.90    3.23
  27   3   1  107.75    3.21
  27   3   1  109.58    3.10
 -27   3  -1  103.55    3.63
 -27   3  -1  111.76    3.75
 -27   3  -1  112.82    4.06
 -27   3  -1  105.66    3.86
 -27   3  -1  111.74    3.07
  27   3   1  112.41    3.69
  27   3   1  113.03    3.69
  29  -3   1    0.77    0.71
 -29  -3  -1    1.32    0.68
  29  -3   1    1.49    0.81
 -29   3  -1    0.57    0.47
  29   3   1    1.71    0.77
 -29   3  -1    1.51    0.75
  29   3   1    1.52    0.48
 -29   3  -1    0.64    0.86
  29   3   1    1.43    0.44
 -29   3  -1    0.80    0.85
  29   3   1    0.84    0.74
 -29   3  -1    0.26    0.85
  29   3   1    1.92    0.56
  31  -3   1  106.51    3.82
  31  -3   1  103.48    3.82
 -31  -3  -1  103.78    3.30
  31   3   1   96.32    3.02
  31   3   1   98.75    3.61
  31   3   1  100.61    3.09
 -31   3  -1   94.11    3.58
  31   3   1   97.74    3.58
  31   3   1   98.89    3.05
 -31   3  -1   92.99    2.83
 -31   3  -1   92.73    3.83
 -31   3  -1  100.24    3.96
 -33  -3  -1    4.03    0.85
  33  -3   1    2.43    0.85
  33  -3   1    3.34    0.93
  33   3   1    4.99    1.00
 -33   3  -1    5.70    0.75
 -33   3  -1    6.68    1.45
 -33   3  -1    5.23    1.31
  33   3   1    7.65    0.95
 -33   3  -1    7.15    1.34
  33   3   1    3.24    0.89
  35  -3   1   40.43    2.35
 -35  -3  -1   40.27    1.87
  35  -3   1   39.82    2.36
  35   3   1   42.70    2.38
 -35   3  -1   41.09    2.77
  35   3   1   44.77    1.95
 -35   3  -1   45.20    2.56
 -35   3  -1   39.44    2.64
  35   3   1   41.51    2.31
  37  -3   1   39.34    2.40
 -37  -3  -1   35.63    1.77
  37  -3   1   32.08    2.19
  37   3   1   27.37    1.95
  37   3   1   38.00    2.29
 -37   3  -1   30.38    2.25
  37   3   1   31.85    1.68
 -37   3  -1   34.79    2.55
 -37   3  -1   33.77    2.50
  39  -3   1   30.22    2.18
  39  -3   1   27.87    2.08
  39   3   1   28.36    2.08
 -39   3  -1   25.99    2.68
 -39   3  -1   23.74    2.22
  39   3   1   26.81    1.62
  39   3   1   25.08    2.20
 -39   3  -1   27.84    2.38
  41  -3   1   75.04    3.44
  41  -3   1   74.45    3.53
 -41   3  -1   61.46    3.57
 -41   3  -1   62.39    3.17
  41   3   1   65.62    3.18
 -41   3  -1   58.92    3.39
  41   3   1   59.05    3.07
  43  -3   1    2.28    0.86
  43  -3   1    4.53    1.32
  43  -3   1    4.50    1.26
  43   3   1    1.72    1.02
 -43   3  -1    2.06    1.40
  43   3   1    4.98    1.23
 -43   3  -1    3.02    1.30
 -43   3  -1    1.66    1.17
  45  -3   1   65.63    3.06
  45  -3   1   67.15    3.52
  45  -3   1   70.90    3.41
  45   3   1   60.72    3.21
 -45   3  -1   53.57    3.35
  45   3   1   56.52    3.13
 -45   3  -1   55.25    3.12
 -45   3  -1   57.58    3.57
  47  -3   1    2.68    1.08
  47  -3   1    3.27    1.20
  47  -3   1    3.17    1.29
 -47   3  -1    3.67    1.37
  47   3   1    2.89    1.12
  47   3   1    2.44    1.18
 -47   3  -1    0.85    1.42
  49  -3   1   39.92    2.77
  49  -3   1   41.90    2.95
  49  -3   1   36.55    2.41
 -49   3  -1   35.14    2.62
  49   3   1   36.31    2.61
  49   3   1   40.20    2.81
 -49   3  -1   36.84    3.06
  51  -3   1    8.76    1.51
  51  -3   1    7.86    1.61
  51  -3   1    8.58    1.79
 -51   3  -1    9.81    1.73
  51   3   1   10.79    1.90
 -51   3  -1   12.26    2.14
  51   3   1    7.54    1.62
  53  -3   1    6.68    1.76
  53  -3   1   11.04    1.87
  53  -3   1    9.49    1.62
 -53   3  -1   10.79    2.17
  53   3   1   13.26    2.06
 -53   3  -1   15.82    2.07
  53   3   1   15.02    2.19
  55  -3   1   13.65    2.19
  55  -3   1   15.40    2.08
  55  -3   1   19.86    2.15
 -55   3  -1   17.29    2.66
  55   3   1   14.17    2.14
  55   3   1   19.06    2.47
 -55   3  -1   16.20    2.10
  57  -3   1    3.39    1.24
  57  -3   1    2.77    1.24
  57  -3   1    0.92    1.11
  57   3   1    1.41    1.20
 -57   3  -1    4.26    1.81
  57   3   1    3.48    1.48
 -57   3  -1    0.23    1.22
  59  -3   1   14.17    2.20
  59  -3   1   12.60    1.90
  59  -3   1   11.48    1.98
  59   3   1   18.47    2.48
 -59   3  -1   20.71    2.81
  59   3   1   16.11    2.38
  61  -3   1    1.68    1.47
  61   3   1    1.77    1.32
  61   3   1    0.23    1.15
  60  -4  -1   -0.30    1.32
 -60   4   1   -0.68    1.59
  60   4  -1   -0.50    1.13
 -60   4   1   -0.14    1.35
  60   4  -1    1.19    1.42
  58  -4  -1   17.72    2.34
  58  -4  -1   16.56    2.44
  58   4  -1   15.19    2.33
  58   4  -1   15.90    2.23
 -58   4   1   13.54    2.62
 -58   4   1   14.92    2.18
  56  -4  -1    5.10    1.75
  56  -4  -1    5.56    1.53
  56   4  -1    7.85    1.72
 -56   4   1    4.91    1.73
  56   4  -1    3.70    1.66
 -56   4   1    4.80    1.95
  54  -4  -1    7.65    1.71
  54  -4  -1   12.52    1.95
 -54   4   1    6.08    1.96
  54   4  -1    5.19    1.51
  54   4  -1    8.25    1.83
 -54   4   1    4.83    1.61
  52  -4  -1   19.50    2.37
  52  -4  -1   26.40    2.84
 -52   4   1   22.47    2.53
 -52   4   1   18.81    2.79
  52   4  -1   17.58    2.19
  52   4  -1   19.21    2.36
  50  -4  -1    2.31    1.21
  50  -4  -1    3.42    1.40
 -50   4   1    2.07    1.76
  50   4  -1    1.64    1.09
  50   4  -1    1.48    1.26
 -50   4   1    0.15    1.27
 -50   4   1    1.80    1.52
  48  -4  -1   33.89    2.62
  48  -4  -1   39.20    2.88
  48  -4  -1   38.60    3.90
 -48   4   1   30.64    2.83
 -48   4   1   29.88    3.10
 -48   4   1   34.14    3.49
  48   4  -1   31.86    2.81
  48   4  -1   33.73    2.50
  46  -4  -1    4.67    1.33
  46  -4  -1    5.81    1.11
  46  -4  -1    2.71    1.22
 -46   4   1    1.41    1.51
  46   4  -1    2.38    1.05
  46   4  -1    4.89    1.39
 -46   4   1    2.31    1.53
 -46   4   1    3.70    1.43
  44  -4  -1   31.30    2.45
  44  -4  -1   33.07    2.03
  44  -4  -1   28.62    2.31
 -44   4   1   33.35    2.70
  44   4  -1   35.58    2.40
 -44   4   1   38.09    3.55
 -44   4   1   36.91    3.05
  44   4  -1   36.52    3.01
  42  -4  -1   27.65    2.55
  42  -4  -1   22.62    2.24
  42  -4  -1   28.40    1.83
  42   4  -1   26.81    2.08
 -42   4   1   32.86    2.84
  42   4  -1   35.24    2.51
 -42   4   1   30.13    2.74
 -42   4   1   29.22    3.11
  40  -4  -1   20.18    1.53
  40  -4  -1   21.20    2.26
 -40  -4   1   19.66    1.62
  40  -4  -1   18.27    1.49
  40  -4  -1   17.42    1.94
  40   4  -1   17.02    1.80
  40   4  -1   17.52    2.01
 -40   4   1   22.57    2.58
 -40   4   1   17.38    2.38
 -40   4   1   17.15    2.12
  38  -4  -1   66.73    2.75
  38  -4  -1   66.15    3.20
  38  -4  -1   74.27    3.46
  38  -4  -1   68.98    2.72
 -38  -4   1   68.59    2.84
 -38   4   1   78.82    3.02
 -38   4   1   80.40    3.70
 -38   4   1   78.85    3.92
  38   4  -1   74.95    3.27
 -38   4   1   77.82    4.06
  38   4  -1   84.79    3.62
 -36  -4   1    6.38    1.14
  36  -4  -1    7.82    1.39
  36  -4  -1    6.49    0.97
  36  -4  -1    6.52    1.06
  36  -4  -1    6.53    1.31
 -36   4   1    5.74    1.43
 -36   4   1    6.14    1.44
  36   4  -1    5.38    1.17
  36   4  -1    6.95    1.15
 -36   4   1    6.05    1.04
 -36   4   1    2.47    1.29
  34  -4  -1  114.51    3.56
  34  -4  -1  115.25    4.28
  34  -4  -1  109.77    3.69
 -34  -4   1  107.78    3.73
  34  -4  -1  111.22    4.17
 -34   4   1  104.55    4.40
 -34   4   1  103.74    4.38
  34   4  -1  104.38    3.70
 -34   4   1  106.31    3.52
 -34   4   1  101.15    4.17
  34   4  -1  100.03    3.91
 -32  -4   1    3.17    0.98
  32  -4  -1    1.05    0.72
  32  -4  -1    1.93    0.95
  32  -4  -1    3.76    0.97
  32  -4  -1    2.34    0.68
 -32   4   1    5.05    1.35
 -32   4   1    2.14    1.15
 -32   4   1    3.12    0.87
  32   4  -1    4.01    0.98
  32   4  -1    3.49    0.88
 -32   4   1    5.12    1.37
  30  -4  -1  105.08    3.85
  30  -4  -1  102.13    3.77
  30  -4  -1   97.20    3.11
 -30  -4   1  102.21    2.95
  30  -4  -1   99.51    3.43
 -30  -4   1  100.91    3.51
 -30   4   1   98.40    3.90
 -30   4   1   86.84    3.63
 -30   4   1   92.62    3.12
 -30   4   1   89.51    3.91
  30   4  -1   91.55    3.28
 -30   4   1   95.66    3.73
  30   4  -1   94.96    3.52
 -28  -4   1   19.27    1.14
  28  -4  -1   22.33    1.68
  28  -4  -1   22.13    1.51
  28  -4  -1   16.81    1.61
  28  -4  -1   20.49    1.18
 -28  -4   1   20.53    1.57
 -28   4   1   16.21    1.86
  28   4  -1   13.75    0.79
 -28   4   1   11.58    1.19
 -28   4   1   10.72    1.43
  28   4  -1   15.30    1.05
 -28   4   1   11.82    1.40
  28   4  -1   15.53    1.41
  28   4  -1   11.73    1.33
 -28   4   1   12.47    1.63
  26  -4  -1   82.36    2.96
  26  -4  -1   83.49    2.60
 -26  -4   1   84.63    3.09
 -26  -4   1   84.37    2.55
  26  -4  -1   83.70    3.26
  26  -4  -1   87.30    3.20
  26   4  -1   68.44    2.81
  26   4  -1   67.33    2.31
 -26   4   1   71.22    3.08
 -26   4   1   66.71    3.21
 -26   4   1   74.89    2.64
 -26   4   1   74.29    3.04
  26   4  -1   69.95    2.01
  26   4  -1   71.99    2.62
 -26   4   1   74.34    3.13
 -24  -4   1  111.96    3.64
  24  -4  -1  101.55    3.54
  24  -4  -1  107.92    3.50
  24  -4  -1  111.15    3.07
 -24  -4   1  108.07    3.05
  24  -4  -1  112.38    3.78
 -24   4   1  101.28    3.67
 -24   4   1  103.64    3.70
 -24   4   1   96.87    3.15
  24   4  -1   96.99    2.89
 -24   4   1   95.78    3.54
  24   4  -1  101.76    3.21
 -24   4   1  104.95    3.93
  24   4  -1  102.68    2.63
  24   4  -1   98.37    3.41
 -22  -4   1   24.65    1.18
  22  -4  -1   23.79    1.46
 -22  -4   1   24.10    1.61
  22  -4  -1   25.03    1.12
  22  -4  -1   23.93    1.63
  22  -4  -1   24.30    1.49
 -22   4   1   25.52    1.68
 -22   4   1   26.88    1.71
 -22   4   1   25.08    1.91
 -22   4   1   24.04    1.40
 -22   4   1   27.38    1.76
  22   4  -1   26.59    0.99
  22   4  -1   26.11    1.57
  22   4  -1   25.09    1.35
  22   4  -1   22.99    1.15
  20  -4  -1   83.77    2.85
 -20  -4   1   86.21    3.02
  20  -4  -1   86.24    2.37
  20  -4  -1   85.31    2.50
  20  -4  -1   86.54    3.07
 -20  -4   1   83.70    2.52
  20  -4  -1   86.59    2.91
  20   4  -1   63.09    2.01
  20   4  -1   64.87    1.79
 -20   4   1   67.42    2.63
 -20   4   1   65.25    2.63
  20   4  -1   62.60    2.39
 -20   4   1   64.60    2.32
 -20   4   1   64.77    2.64
 -20   4   1   66.04    2.89
  20   4  -1   66.28    2.24
 -18  -4   1   21.18    1.50
  18  -4  -1   20.98    1.27
  18  -4  -1   21.12    1.42
 -18  -4   1   19.32    1.07
  18  -4  -1   19.25    1.29
  18  -4  -1   21.02    1.09
  18  -4  -1   20.25    0.87
 -18   4   1   19.64    1.42
 -18   4   1   19.28    1.59
 -18   4   1   15.63    1.14
  18   4  -1   17.52    0.91
 -18   4   1   19.81    1.43
  18   4  -1   18.12    1.21
 -18   4   1   18.45    1.37
  18   4  -1   16.22    0.99
  16  -4  -1   89.97    3.01
 -16  -4   1   86.51    2.50
  16  -4  -1   91.48    2.25
 -16  -4   1   86.21    2.48
  16  -4  -1   89.32    2.62
  16  -4  -1   90.98    2.91
  16  -4  -1   86.47    2.73
 -16  -4   1   87.63    3.09
 -16  -4   1   88.67    2.61
 -16   4   1   61.08    2.66
  16   4  -1   65.30    2.07
 -16   4   1   67.94    2.49
 -16   4   1   70.71    2.35
 -16   4   1   65.97    2.48
  16   4  -1   67.95    2.30
  16   4  -1   65.03    1.99
 -16   4   1   64.42    2.50
  14  -4  -1  108.49    3.11
  14  -4  -1  118.18    3.42
 -14  -4   1  114.39    3.61
  14  -4  -1  113.56    3.18
 -14  -4   1  111.75    2.92
 -14  -4   1  106.30    2.91
  14  -4  -1  110.03    3.41
 -14  -4   1  111.32    3.10
  14  -4  -1  110.89    2.60
 -14   4   1  116.95    3.77
  14   4  -1  116.48    3.05
 -14   4   1  116.56    3.39
 -14   4   1  117.11    3.55
  14   4  -1  117.47    3.31
  14   4  -1  111.71    3.06
 -14   4   1  115.17    3.59
 -14   4   1  119.50    3.55
 -12  -4   1  114.38    3.05
 -12  -4   1  118.24    3.24
 -12  -4   1  116.52    2.99
  12  -4  -1  119.18    3.32
 -12  -4   1  119.43    3.72
  12  -4  -1  118.06    3.48
  12  -4  -1  114.15    3.48
  12  -4  -1  122.11    3.23
 -12   4   1  135.77    3.96
  12   4  -1  126.94    3.22
  12   4  -1  123.81    3.26
 -12   4   1  123.07    3.56
 -12   4   1  130.51    3.82
 -12   4   1  129.28    3.69
  12   4  -1  126.51    3.46
 -12   4   1  124.90    3.67
 -10  -4   1  204.75    4.76
  10  -4  -1  202.11    5.29
 -10  -4   1  203.19    5.06
  10  -4  -1  199.57    4.95
  10  -4  -1  210.48    5.31
  10  -4  -1  202.19    5.14
 -10  -4   1  203.06    5.51
 -10  -4   1  201.57    4.90
 -10   4   1  206.20    5.56
 -10   4   1  217.69    5.47
  10   4  -1  209.63    5.22
  10   4  -1  211.62    5.09
 -10   4   1  209.79    5.43
  10   4  -1  217.53    4.94
 -10   4   1  219.84    5.47
 -10   4   1  216.96    5.69
  -8  -4   1   48.15    1.48
   8  -4  -1   50.10    1.82
  -8  -4   1   48.99    1.76
   8  -4  -1   49.95    1.90
   8  -4  -1   48.76    1.91
   8  -4  -1   50.03    1.62
  -8  -4   1   53.52    2.19
  -8  -4   1   48.69    1.64
   8   4  -1   51.20    1.72
   8   4  -1   53.99    1.45
  -8   4   1   56.43    2.01
  -8   4   1   55.49    2.12
  -8   4   1   52.90    1.92
  -8   4   1   56.34    1.96
  -8   4   1   57.06    2.12
   8   4  -1   52.02    1.70
  -6  -4   1  314.25    7.07
   6  -4  -1  313.85    7.55
  -6  -4   1  319.93    7.87
  -6  -4   1  326.74    7.49
   6  -4  -1  307.82    7.57
   6  -4  -1  314.08    7.19
   6  -4  -1  314.84    7.45
   6  -4  -1  314.07    7.60
  -6   4   1  342.60    8.25
   6   4  -1  344.68    7.82
   6   4  -1  342.57    7.87
  -6   4   1  354.56    8.06
  -6   4   1  331.78    8.20
   6   4  -1  346.90    7.42
  -6   4   1  339.27    8.04
   4  -4  -1   10.55    0.98
   4  -4  -1   11.37    0.91
   4  -4  -1    9.84    0.85
  -4  -4   1   11.37    0.90
  -4  -4   1   14.16    1.12
   4  -4  -1   10.53    0.68
  -4  -4   1   12.26    0.79
  -4  -4   1   11.31    0.65
   4  -4  -1   10.64    0.85
  -4   4   1   11.23    0.80
  -4   4   1   11.82    0.96
  -4   4   1    9.76    0.78
   4   4  -1   12.86    0.71
  -4   4   1   11.53    1.04
   4   4  -1   12.73    0.79
   2  -4  -1  329.43    7.84
   2  -4  -1  312.96    7.52
  -2  -4   1  322.34    7.43
   2  -4  -1  324.97    7.74
  -2  -4   1  317.25    7.90
   2  -4  -1  317.77    7.26
  -2  -4   1  330.57    7.70
  -2  -4   1  323.46    7.27
   2  -4  -1  330.66    7.66
   2   4  -1  312.93    7.54
   2   4  -1  332.72    7.63
   2   4  -1  323.08    7.50
  -2   4   1  328.96    7.80
   2   4  -1  327.43    7.29
  -2   4   1  316.25    7.63
  -2   4   1  318.89    6.95
   2   4  -1  327.44    7.82
  -2   4   1  333.97    7.50
   2   4  -1  326.52    7.50
  -2   4   1  319.38    7.47
   0  -4   1   94.09    2.50
   0  -4  -1   97.88    2.70
   0  -4  -1   95.67    2.87
   0  -4   1   91.80    2.64
   0  -4   1  100.28    3.05
   0  -4   1   89.36    2.81
   0  -4  -1   95.29    2.97
   0   4   1  100.94    2.69
   0   4  -1  101.71    2.87
   0   4   1   99.90    2.67
   0   4  -1  102.10    3.04
   0   4   1   99.19    2.36
   0   4  -1  100.80    2.81
   0   4  -1  104.46    2.55
   0   4  -1   98.98    2.92
   0   4   1   99.85    3.03
   0   4   1   98.14    2.81
   0   4  -1  103.79    2.82
   2  -4   1  229.63    4.97
  -2  -4  -1  223.01    5.70
   2  -4   1  226.48    5.56
  -2  -4  -1  226.13    5.88
   2  -4   1  230.51    5.85
   2  -4   1  238.25    5.39
  -2  -4  -1  225.80    5.51
   2  -4   1  232.04    5.75
   2   4   1  211.39    4.86
  -2   4  -1  213.38    4.92
  -2   4  -1  226.38    5.32
   2   4   1  217.62    5.51
  -2   4  -1  210.11    5.41
  -2   4  -1  219.07    5.31
   2   4   1  214.37    5.05
   2   4   1  222.19    5.20
  -2   4  -1  210.59    5.48
  -2   4  -1  211.42    5.36
   2   4   1  216.98    5.05
  -4  -4  -1  100.51    3.18
   4  -4   1   98.64    3.04
  -4  -4  -1  104.89    2.82
   4  -4   1   99.75    2.90
   4  -4   1  100.49    2.38
  -4  -4  -1   99.79    2.96
   4  -4   1  101.36    3.04
   4   4   1   86.27    2.44
  -4   4  -1   91.02    2.67
  -4   4  -1   93.74    2.29
   4   4   1   91.47    2.34
   4   4   1   89.84    2.81
  -4   4  -1   93.56    2.85
  -4   4  -1   91.09    2.68
  -4   4  -1   91.23    2.81
   4   4   1   90.23    2.34
   4   4   1   92.19    2.36
  -6  -4  -1   48.97    2.01
  -6  -4  -1   50.74    1.70
   6  -4   1   48.24    1.86
   6  -4   1   49.85    1.39
   6  -4   1   48.26    1.82
  -6  -4  -1   49.09    1.82
  -6   4  -1   46.66    1.33
  -6   4  -1   46.43    1.73
  -6   4  -1   45.48    1.70
   6   4   1   45.15    1.44
  -6   4  -1   44.18    1.80
   6   4   1   47.11    1.36
  -6   4  -1   45.67    1.83
   6   4   1   46.86    1.43
   6   4   1   46.80    1.47
  -8  -4  -1  178.76    4.56
  -8  -4  -1  169.00    4.77
   8  -4   1  171.36    4.51
   8  -4   1  174.87    4.59
  -8  -4  -1  169.34    4.33
   8  -4   1  175.93    4.12
  -8   4  -1  174.18    4.53
  -8   4  -1  168.91    4.52
  -8   4  -1  166.36    4.66
   8   4   1  172.66    4.05
   8   4   1  174.42    4.26
  -8   4  -1  174.96    4.63
   8   4   1  174.24    4.07
  10  -4   1   32.61    1.41
 -10  -4  -1   32.04    1.71
  10  -4   1   32.70    1.20
  10  -4   1   32.82    1.57
 -10  -4  -1   34.90    1.50
 -10  -4  -1   31.72    1.35
  10   4   1   35.08    1.35
 -10   4  -1   33.79    1.61
  10   4   1   34.46    1.07
 -10   4  -1   33.54    1.68
 -10   4  -1   30.31    1.45
  10   4   1   32.92    1.01
 -10   4  -1   33.81    1.54
 -12  -4  -1  153.89    4.36
  12  -4   1  144.11    4.19
 -12  -4  -1  152.60    4.02
  12  -4   1  142.44    3.75
  12  -4   1  143.29    3.87
 -12  -4  -1  147.18    3.87
  12   4   1  129.94    3.16
 -12   4  -1  143.90    3.89
 -12   4  -1  136.14    3.85
 -12   4  -1  130.90    3.88
  12   4   1  132.43    3.08
  12   4   1  132.91    3.63
 -12   4  -1  129.97    3.99
 -14  -4  -1   47.93    2.09
 -14  -4  -1   48.98    1.87
  14  -4   1   49.16    1.76
 -14  -4  -1   51.47    1.81
  14  -4   1   46.36    2.01
  14  -4   1   48.50    1.72
  14   4   1   41.00    1.21
  14   4   1   42.68    1.14
 -14   4  -1   37.08    1.78
 -14   4  -1   40.84    1.84
 -14   4  -1   41.21    1.61
 -14   4  -1   42.21    2.00
 -14   4  -1   45.45    1.90
  14   4   1   42.41    1.68
  16  -4   1   32.63    1.76
 -16  -4  -1   33.45    1.50
 -16  -4  -1   32.46    1.76
 -16  -4  -1   33.48    1.48
  16  -4   1   31.02    1.44
  16  -4   1   33.67    1.33
  16   4   1   29.79    1.48
 -16   4  -1   30.84    1.61
  16   4   1   30.37    0.99
 -16   4  -1   29.32    1.35
 -16   4  -1   30.95    1.60
  16   4   1   32.24    1.39
 -16   4  -1   29.63    1.77
  16   4   1   29.20    0.91
 -16   4  -1   33.41    1.67
 -18  -4  -1  119.23    3.51
  18  -4   1  128.12    3.65
  18  -4   1  123.34    3.27
 -18  -4  -1  126.15    3.88
  18  -4   1  122.69    3.92
 -18  -4  -1  125.00    3.57
 -18   4  -1  113.12    3.73
 -18   4  -1  105.95    3.46
  18   4   1  107.96    3.19
 -18   4  -1  107.58    3.06
  18   4   1  107.07    2.68
  18   4   1  102.85    2.58
 -18   4  -1  113.67    3.57
  18   4   1  106.62    3.34
 -20  -4  -1    4.21    0.73
 -20  -4  -1    3.38    0.87
  20  -4   1    2.72    0.66
  20  -4   1    4.03    0.54
  20  -4   1    3.09    0.85
 -20  -4  -1    4.32    0.72
  20   4   1    1.24    0.48
 -20   4  -1    1.30    0.72
 -20   4  -1    1.49    0.67
 -20   4  -1    1.11    0.63
  20   4   1    1.21    0.55
 -20   4  -1    1.30    0.79
  20   4   1    1.52    0.29
  20   4   1    1.63    0.33
 -20   4  -1    1.50    0.51
  22  -4   1  166.07    4.78
  22  -4   1  171.04    5.10
 -22  -4  -1  158.92    4.46
  22  -4   1  161.94    4.05
 -22  -4  -1  168.13    4.61
 -22  -4  -1  168.92    4.84
 -22   4  -1  166.33    4.38
 -22   4  -1  176.30    4.98
  22   4   1  161.29    4.09
  22   4   1  167.44    4.02
  22   4   1  171.11    4.38
 -22   4  -1  171.81    5.06
  22   4   1  167.08    4.87
 -22   4  -1  170.23    5.26
 -22   4  -1  170.91    5.02
  22   4   1  170.89    4.72
  24  -4   1   12.28    1.29
  24  -4   1   15.20    1.68
  24  -4   1   11.82    0.70
 -24  -4  -1   10.44    1.25
 -24  -4  -1   12.18    1.14
  24   4   1    8.66    1.16
  24   4   1   11.74    0.98
 -24   4  -1   11.58    0.98
  24   4   1   11.85    1.21
 -24   4  -1   12.72    1.61
 -24   4  -1   10.09    1.21
 -24   4  -1   10.98    1.38
 -24   4  -1   10.02    1.35
  24   4   1   10.04    0.66
  26  -4   1  225.45    6.47
  26  -4   1  218.93    5.10
  26  -4   1  207.08    6.12
 -26  -4  -1  222.38    5.74
 -26  -4  -1  227.61    6.05
  26   4   1  212.34    6.12
 -26   4  -1  216.47    6.24
  26   4   1  227.19    5.57
 -26   4  -1  214.77    6.30
  26   4   1  222.49    6.04
 -26   4  -1  228.40    5.56
 -26   4  -1  221.83    6.58
 -26   4  -1  211.86    6.18
  26   4   1  218.26    5.28
 -28  -4  -1   14.41    1.46
  28  -4   1   17.89    1.70
  28  -4   1   15.84    1.71
 -28  -4  -1   15.26    1.23
  28   4   1   17.26    1.14
  28   4   1   19.02    1.75
  28   4   1   16.53    1.54
 -28   4  -1   21.67    2.13
 -28   4  -1   18.06    1.75
 -28   4  -1   19.62    1.80
 -28   4  -1   18.31    1.16
  28   4   1   16.74    0.98
 -28   4  -1   16.17    1.56
  30  -4   1   80.76    3.25
 -30  -4  -1   78.92    2.84
  30  -4   1   85.30    3.51
 -30  -4  -1   89.31    3.11
  30   4   1   83.54    2.63
  30   4   1   88.56    2.80
  30   4   1   88.96    3.28
 -30   4  -1   85.88    3.44
 -30   4  -1   81.49    3.69
  30   4   1   89.04    3.40
 -30   4  -1   83.31    3.48
 -30   4  -1   83.45    2.68
  32  -4   1   32.52    2.23
  32  -4   1   32.30    2.10
 -32  -4  -1   35.71    2.00
  32   4   1   38.14    2.18
 -32   4  -1   34.51    1.61
 -32   4  -1   38.34    2.39
 -32   4  -1   36.77    2.48
  32   4   1   37.88    1.67
  32   4   1   36.96    1.72
 -32   4  -1   39.55    2.65
  32   4   1   38.98    2.14
 -34  -4  -1   22.90    1.69
  34  -4   1   19.67    1.95
  34  -4   1   22.88    2.06
 -34   4  -1   18.98    2.17
 -34   4  -1   15.76    2.00
  34   4   1   14.56    1.25
 -34   4  -1   10.82    1.65
  34   4   1   14.96    1.61
  34   4   1   14.89    1.63
 -36  -4  -1   52.26    2.42
  36  -4   1   57.34    2.90
  36  -4   1   56.27    2.94
 -36   4  -1   53.97    3.01
  36   4   1   60.02    2.83
 -36   4  -1   59.58    3.41
  36   4   1   56.55    2.89
 -36   4  -1   60.64    3.31
  38  -4   1    2.93    1.02
 -38  -4  -1    5.88    1.04
  38  -4   1    3.46    1.17
 -38   4  -1    5.21    1.40
 -38   4  -1    5.31    1.61
  38   4   1    4.45    1.12
 -38   4  -1    3.01    1.39
  38   4   1    3.70    1.14
  40  -4   1   44.81    2.75
 -40  -4  -1   43.01    2.99
  40  -4   1   44.74    2.75
 -40   4  -1   44.50    3.20
 -40   4  -1   48.82    3.23
  40   4   1   45.16    2.66
  40   4   1   43.54    2.57
 -40   4  -1   44.78    2.94
  42  -4   1   12.50    1.88
  42  -4   1   13.11    1.53
  42  -4   1   13.66    1.88
 -42   4  -1   12.43    2.22
  42   4   1    9.77    1.55
  42   4   1    8.46    1.56
 -42   4  -1    9.72    1.86
 -42   4  -1    8.26    1.68
  44  -4   1   16.70    2.09
  44  -4   1   18.45    2.11
  44  -4   1   19.05    1.83
  44   4   1    9.83    1.69
 -44   4  -1   11.84    2.16
 -44   4  -1   12.53    2.02
 -44   4  -1    9.11    1.86
  44   4   1   17.72    2.07
  46  -4   1   34.24    2.57
  46  -4   1   32.42    2.49
  46  -4   1   31.01    2.08
  46   4   1   33.57    2.61
 -46   4  -1   36.44    3.40
  46   4   1   34.40    2.52
 -46   4  -1   28.81    2.75
 -46   4  -1   35.22    3.03
  48  -4   1    5.62    1.51
  48  -4   1    4.46    1.38
  48  -4   1    3.38    1.12
  48   4   1    3.35    1.34
 -48   4  -1    4.67    1.58
  48   4   1    4.76    1.41
 -48   4  -1    5.76    2.70
 -48   4  -1    2.07    1.61
  50  -4   1   48.66    2.74
  50  -4   1   48.41    3.06
  50  -4   1   45.54    3.15
  50   4   1   54.38    3.23
 -50   4  -1   53.32    3.76
 -50   4  -1   46.82    3.23
  50   4   1   46.81    3.17
  52  -4   1    1.11    1.15
  52  -4   1    2.10    1.22
  52   4   1   -0.29    1.07
 -52   4  -1    2.86    1.46
  52   4   1    2.19    1.27
 -52   4  -1    0.42    1.59
  54  -4   1   27.39    2.83
  54  -4   1   28.37    2.74
  54   4   1   26.54    2.78
 -54   4  -1   24.12    2.64
  54   4   1   27.13    2.79
 -54   4  -1   28.16    3.21
  56  -4   1    1.07    1.23
  56  -4   1    1.61    1.27
  56   4   1    2.99    1.36
 -56   4  -1    2.19    1.52
 -56   4  -1    2.31    1.67
  56   4   1    1.54    1.41
  58  -4   1    8.27    1.88
  58  -4   1    5.67    1.61
  58   4   1   12.55    2.16
 -58   4  -1    7.21    2.10
  58   4   1    8.39    1.98
 -58   4  -1   10.55    2.03
  57  -5  -1   13.91    2.27
  57  -5  -1   18.00    2.32
  57   5  -1   23.86    2.81
 -57   5   1   15.85    2.65
  57   5  -1   16.73    2.18
 -57   5   1   16.81    2.48
  55  -5  -1    0.73    1.31
  55  -5  -1   -0.35    1.11
 -55   5   1    1.41    1.55
 -55   5   1    0.08    1.62
  55   5  -1    0.63    1.07
  55   5  -1    1.68    1.43
  53  -5  -1   24.74    2.85
  53  -5  -1   25.09    2.80
 -53   5   1   24.43    2.74
  53   5  -1   25.75    2.60
 -53   5   1   28.80    3.43
  53   5  -1   27.12    2.96
  51  -5  -1    4.37    1.52
  51  -5  -1    6.09    1.67
 -51   5   1    2.78    1.44
  51   5  -1    6.08    1.60
 -51   5   1    3.78    1.94
  51   5  -1    2.51    1.20
 -51   5   1    3.84    1.86
  49  -5  -1   23.03    2.63
  49  -5  -1   22.04    2.51
 -49   5   1   21.97    3.08
  49   5  -1   31.43    2.40
 -49   5   1   21.76    2.63
  49   5  -1   26.06    2.63
 -49   5   1   20.88    2.73
  47  -5  -1   19.92    2.38
  47  -5  -1   14.73    2.04
 -47   5   1   14.85    2.43
 -47   5   1   11.17    2.13
  47   5  -1   11.31    1.66
 -47   5   1   13.27    2.41
  47   5  -1   10.91    1.87
  45  -5  -1   17.82    2.28
  45  -5  -1   13.83    2.03
  45   5  -1   14.99    1.81
 -45   5   1   16.32    2.32
 -45   5   1   11.42    2.23
 -45   5   1   19.42    2.62
  45   5  -1   14.84    2.08
  43  -5  -1   22.59    2.37
  43  -5  -1   20.97    2.27
 -43   5   1   23.95    2.75
  43   5  -1   27.58    2.07
  43   5  -1   25.52    2.49
 -43   5   1   24.03    2.70
 -43   5   1   26.77    3.12
 -41  -5   1    4.08    1.13
  41  -5  -1    3.91    1.29
  41  -5  -1    2.55    1.22
  41  -5  -1    5.73    1.14
 -41   5   1    3.16    1.64
  41   5  -1    3.70    1.21
 -41   5   1    5.49    1.73
  41   5  -1    4.13    1.09
 -41   5   1    5.65    1.62
  39  -5  -1   65.34    3.34
  39  -5  -1   57.75    3.23
 -39  -5   1   59.58    2.87
  39  -5  -1   61.44    2.80
 -39   5   1   59.88    3.70
 -39   5   1   69.99    3.87
  39   5  -1   61.33    3.21
 -39   5   1   62.45    3.54
  39   5  -1   62.67    2.92
 -37  -5   1   23.93    2.05
  37  -5  -1   25.62    2.35
  37  -5  -1   24.94    2.39
  37  -5  -1   24.39    1.82
 -37   5   1   20.15    1.75
 -37   5   1   21.46    2.47
 -37   5   1   20.83    2.29
  37   5  -1   22.62    2.16
 -37   5   1   18.69    2.27
  37   5  -1   24.44    1.78
 -35  -5   1   66.11    3.05
  35  -5  -1   70.55    3.40
  35  -5  -1   66.00    2.88
  35  -5  -1   70.35    3.30
 -35   5   1   56.48    3.29
  35   5  -1   62.84    3.08
 -35   5   1   59.42    3.52
 -35   5   1   62.05    2.68
 -35   5   1   67.03    3.53
  35   5  -1   57.78    2.67
  33  -5  -1   36.88    2.45
 -33  -5   1   34.37    2.17
  33  -5  -1   32.95    2.21
  33  -5  -1   32.87    2.05
  33  -5  -1   33.39    2.37
 -33   5   1   39.62    2.61
 -33   5   1   40.84    2.94
  33   5  -1   44.87    2.24
 -33   5   1   45.90    2.24
  33   5  -1   45.62    2.56
 -33   5   1   38.67    2.72
 -31  -5   1   47.44    1.93
  31  -5  -1   46.20    2.33
  31  -5  -1   49.63    2.72
 -31  -5   1   43.49    2.37
  31  -5  -1   43.44    2.41
  31  -5  -1   42.89    1.81
 -31   5   1   32.40    2.61
 -31   5   1   35.93    2.48
  31   5  -1   35.35    2.21
 -31   5   1   38.28    2.03
 -31   5   1   34.39    2.39
  31   5  -1   36.07    1.93
 -31   5   1   32.97    2.35
  29  -5  -1   82.67    3.52
 -29  -5   1   82.89    3.29
  29  -5  -1   83.27    3.27
  29  -5  -1   84.76    3.32
 -29  -5   1   85.41    2.75
  29  -5  -1   86.03    2.64
 -29   5   1   79.03    3.82
 -29   5   1   81.88    3.02
  29   5  -1   85.89    3.34
 -29   5   1   83.00    3.65
 -29   5   1   79.46    3.58
 -29   5   1   85.36    3.56
  29   5  -1   82.21    2.99
  27  -5  -1    8.12    1.32
  27  -5  -1    9.45    1.26
  27  -5  -1    8.81    0.81
 -27  -5   1    8.82    1.34
  27  -5  -1    5.91    1.07
 -27  -5   1    8.64    0.93
 -27   5   1    4.93    1.42
 -27   5   1    3.50    1.03
  27   5  -1    6.03    0.90
 -27   5   1    4.90    1.15
 -27   5   1    5.38    1.19
  27   5  -1    5.74    1.11
 -27   5   1    5.68    0.99
  25  -5  -1   69.13    2.14
  25  -5  -1   71.41    2.88
  25  -5  -1   69.34    3.06
 -25  -5   1   72.49    2.46
 -25  -5   1   73.69    3.05
  25  -5  -1   73.64    2.83
 -25   5   1   63.97    2.91
  25   5  -1   62.43    2.36
  25   5  -1   63.21    2.16
 -25   5   1   59.00    2.89
 -25   5   1   63.66    3.20
 -25   5   1   64.69    2.52
 -25   5   1   59.35    2.84
  25   5  -1   63.64    2.66
  23  -5  -1   31.68    1.71
  23  -5  -1   26.99    1.11
  23  -5  -1   27.60    1.75
  23  -5  -1   28.53    1.38
 -23  -5   1   27.80    1.45
 -23  -5   1   23.44    1.74
  23  -5  -1   26.35    1.88
 -23   5   1   27.57    1.87
  23   5  -1   27.91    1.07
 -23   5   1   26.18    1.85
  23   5  -1   27.06    1.28
  23   5  -1   24.63    1.38
  23   5  -1   28.65    1.71
 -23   5   1   24.33    1.57
 -23   5   1   27.53    2.12
 -23   5   1   25.70    1.88
  21  -5  -1  130.79    4.32
 -21  -5   1  135.50    4.39
 -21  -5   1  133.32    3.78
  21  -5  -1  131.18    3.71
  21  -5  -1  134.42    4.21
  21  -5  -1  130.59    3.26
  21  -5  -1  133.95    4.00
 -21   5   1  128.87    4.60
  21   5  -1  130.89    3.28
  21   5  -1  131.31    3.57
 -21   5   1  129.95    3.96
  21   5  -1  128.71    3.71
  21   5  -1  130.57    4.01
 -21   5   1  134.65    4.42
 -21   5   1  137.08    4.35
  19  -5  -1   46.25    2.16
  19  -5  -1   46.15    1.32
 -19  -5   1   45.63    2.35
 -19  -5   1   45.95    1.88
  19  -5  -1   48.13    2.27
  19  -5  -1   44.30    1.95
  19  -5  -1   46.25    1.84
 -19   5   1   42.77    2.42
 -19   5   1   43.35    2.18
  19   5  -1   41.25    1.63
 -19   5   1   42.72    2.16
  19   5  -1   41.67    1.57
  19   5  -1   41.34    1.88
 -19   5   1   42.73    2.21
 -19   5   1   39.52    1.89
  17  -5  -1   33.23    1.56
  17  -5  -1   33.59    1.80
 -17  -5   1   35.19    1.38
  17  -5  -1   34.06    1.56
  17  -5  -1   31.11    0.90
 -17  -5   1   30.19    1.49
  17  -5  -1   31.51    1.75
 -17  -5   1   30.21    1.94
  17   5  -1   36.72    1.47
 -17   5   1   39.99    2.00
 -17   5   1   41.55    2.27
  17   5  -1   36.78    1.71
 -17   5   1   39.26    1.79
  17   5  -1   38.66    1.48
 -17   5   1   40.62    2.06
 -17   5   1   36.25    1.97
  15  -5  -1  143.89    3.96
  15  -5  -1  149.17    4.09
 -15  -5   1  149.64    4.61
  15  -5  -1  137.64    4.27
 -15  -5   1  140.65    3.99
 -15  -5   1  148.31    3.74
  15  -5  -1  143.22    4.37
 -15   5   1  132.14    4.14
 -15   5   1  142.07    4.20
 -15   5   1  138.69    4.05
  15   5  -1  136.38    3.55
  15   5  -1  135.50    3.86
 -15   5   1  143.39    4.34
 -15   5   1  130.36    4.42
  15   5  -1  138.97    3.63
 -13  -5   1    7.62    1.22
  13  -5  -1    4.42    0.77
  13  -5  -1    4.93    0.88
 -13  -5   1    4.80    0.59
  13  -5  -1    3.94    0.79
  13  -5  -1    4.94    0.66
 -13  -5   1    5.34    0.78
  13   5  -1    5.74    0.74
 -13   5   1    8.24    1.00
  13   5  -1    6.24    0.59
  13   5  -1    5.32    0.62
 -13   5   1    5.07    0.84
 -13   5   1    5.42    0.89
 -13   5   1    6.08    0.92
 -13   5   1    6.32    1.04
  11  -5  -1  214.76    5.53
  11  -5  -1  208.52    5.63
 -11  -5   1  210.63    5.44
 -11  -5   1  211.05    5.01
 -11  -5   1  207.38    5.90
  11  -5  -1  205.49    5.17
  11  -5  -1  209.78    5.67
 -11   5   1  200.79    5.64
  11   5  -1  203.36    4.67
 -11   5   1  202.62    5.39
 -11   5   1  196.36    5.53
 -11   5   1  195.35    5.36
 -11   5   1  201.83    5.38
  11   5  -1  199.66    4.97
  11   5  -1  203.67    5.08
   9  -5  -1    9.40    1.07
  -9  -5   1   10.63    0.73
   9  -5  -1   11.39    1.15
  -9  -5   1   10.75    1.29
  -9  -5   1   10.09    0.97
   9  -5  -1   11.47    1.13
   9  -5  -1    9.65    0.75
  -9   5   1   13.75    1.26
  -9   5   1   11.67    1.20
   9   5  -1   12.73    0.83
   9   5  -1   11.56    0.82
  -9   5   1   11.92    1.26
   9   5  -1   12.12    0.55
  -9   5   1    9.87    1.02
  -9   5   1   10.89    1.03
  -7  -5   1   69.73    2.42
   7  -5  -1   67.18    2.07
  -7  -5   1   71.53    2.03
   7  -5  -1   71.15    2.51
  -7  -5   1   70.20    2.74
   7  -5  -1   70.12    2.39
   7  -5  -1   70.02    2.53
   7  -5  -1   72.75    2.56
  -7   5   1   65.14    2.33
   7   5  -1   68.90    2.09
  -7   5   1   66.55    2.45
  -7   5   1   70.71    2.39
   7   5  -1   65.48    2.15
  -7   5   1   69.80    2.56
  -7   5   1   75.22    2.62
  -5  -5   1  110.74    3.29
   5  -5  -1  102.08    3.31
   5  -5  -1  108.93    3.31
   5  -5  -1  108.19    2.84
   5  -5  -1  109.85    3.19
   5  -5  -1  107.61    3.39
  -5  -5   1  108.27    3.60
  -5  -5   1  106.28    2.83
  -5   5   1  124.02    3.67
   5   5  -1  119.85    3.32
   5   5  -1  123.52    3.37
  -5   5   1  110.97    3.53
  -5   5   1  119.16    3.43
   5   5  -1  115.83    3.66
   5   5  -1  125.88    3.34
  -5   5   1  124.02    3.76
   5   5  -1  121.66    3.44
   5   5  -1  122.92    3.17
  -5   5   1  125.20    3.48
  -3  -5   1   20.57    1.29
   3  -5  -1   20.48    1.18
   3  -5  -1   19.79    1.27
   3  -5  -1   20.78    1.26
   3  -5  -1   22.18    1.42
  -3  -5   1   19.17    1.08
  -3  -5   1   19.31    1.40
  -3  -5   1   20.18    0.95
  -3   5   1   16.59    1.00
   3   5  -1   15.18    1.08
   3   5  -1   15.59    0.99
   3   5  -1   15.44    0.78
  -3   5   1   16.09    1.08
   3   5  -1   14.80    1.17
   3   5  -1   15.46    0.98
  -3   5   1   15.74    1.24
  -3   5   1   17.90    1.20
   3   5  -1   14.76    0.98
  -3   5   1   17.32    1.05
   1  -5  -1  173.35    4.78
  -1  -5   1  175.93    4.99
   1  -5  -1  176.58    4.54
  -1  -5   1  169.87    4.46
  -1  -5   1  168.98    4.70
   1  -5  -1  169.25    4.86
  -1  -5   1  180.19    4.30
  -1   5   1  173.88    4.38
  -1   5   1  171.83    4.56
  -1   5   1  165.45    4.71
   1   5  -1  163.62    4.41
   1   5  -1  173.02    4.44
   1   5  -1  173.38    4.79
  -1   5   1  171.20    4.37
  -1   5   1  168.29    4.49
   1   5  -1  168.45    4.49
   1   5  -1  173.09    4.10
  -1   5   1  169.13    3.80
   1   5  -1  171.99    4.58
   1  -5   1   57.69    2.22
   1  -5   1   63.44    1.92
   1  -5   1   57.20    2.33
  -1  -5  -1   62.02    2.29
  -1  -5  -1   57.71    2.03
  -1  -5  -1   58.83    2.37
   1  -5   1   58.17    2.06
  -1   5  -1   57.20    1.62
  -1   5  -1   55.30    2.24
  -1   5  -1   53.07    1.96
   1   5   1   54.84    1.48
   1   5   1   55.57    1.84
  -1   5  -1   56.54    2.05
  -1   5  -1   56.87    2.13
   1   5   1   55.76    1.84
   1   5   1   55.52    1.93
   1   5   1   56.87    1.99
   1   5   1   51.63    2.15
  -1   5  -1   55.03    1.99
   3  -5   1  157.36    4.51
   3  -5   1  158.10    4.24
  -3  -5  -1  156.14    4.11
   3  -5   1  157.66    4.00
   3  -5   1  154.28    4.40
  -3  -5  -1  155.03    4.57
  -3  -5  -1  151.97    4.35
   3   5   1  150.84    4.33
   3   5   1  153.64    3.97
  -3   5  -1  143.32    4.21
   3   5   1  152.13    3.58
  -3   5  -1  153.27    3.59
  -3   5  -1  146.64    4.07
   3   5   1  147.14    3.79
   3   5   1  154.93    3.82
  -3   5  -1  153.39    4.34
   3   5   1  146.01    3.89
  -3   5  -1  155.84    4.11
  -3   5  -1  138.28    4.14
   5  -5   1   30.06    0.94
  -5  -5  -1   32.05    1.55
  -5  -5  -1   33.42    1.77
   5  -5   1   28.56    1.59
   5  -5   1   27.68    1.46
   5  -5   1   30.79    1.62
  -5  -5  -1   29.54    1.36
  -5   5  -1   39.74    1.69
  -5   5  -1   36.95    1.17
  -5   5  -1   36.46    1.76
   5   5   1   36.79    1.26
   5   5   1   38.53    1.34
   5   5   1   37.35    1.76
   5   5   1   37.64    1.44
   5   5   1   35.12    1.37
  -5   5  -1   38.17    1.65
   5   5   1   39.79    1.37
  -5   5  -1   36.22    1.76
  -7  -5  -1   65.68    2.62
   7  -5   1   62.45    1.77
  -7  -5  -1   67.23    2.17
  -7  -5  -1   64.96    2.36
   7  -5   1   66.44    2.46
   7  -5   1   67.07    2.37
   7  -5   1   67.88    2.44
  -7   5  -1   65.09    2.47
   7   5   1   62.69    1.87
  -7   5  -1   67.49    2.34
  -7   5  -1   62.69    2.27
  -7   5  -1   64.71    1.73
   7   5   1   59.13    2.35
   7   5   1   63.23    1.92
   7   5   1   65.30    1.89
   7   5   1   64.31    1.99
  -7   5  -1   62.90    2.42
   7   5   1   67.72    1.96
  -9  -5  -1   87.76    2.87
   9  -5   1   86.98    3.00
   9  -5   1   86.14    2.32
   9  -5   1   89.52    2.87
  -9  -5  -1   85.29    3.13
   9  -5   1   85.05    2.90
  -9  -5  -1   86.03    2.63
   9   5   1   82.83    2.30
  -9   5  -1   80.74    2.84
   9   5   1   83.64    2.39
   9   5   1   78.26    2.24
   9   5   1   78.09    2.22
   9   5   1   83.60    2.20
  -9   5  -1   77.39    2.71
  -9   5  -1   81.34    2.72
  -9   5  -1   79.10    2.90
  11  -5   1   34.99    1.65
  11  -5   1   37.08    1.33
 -11  -5  -1   38.90    1.58
 -11  -5  -1   36.06    1.96
  11  -5   1   35.59    1.78
 -11  -5  -1   37.13    1.68
  11  -5   1   37.24    1.83
 -11   5  -1   38.52    1.81
 -11   5  -1   41.67    1.85
  11   5   1   37.80    1.30
  11   5   1   38.06    1.32
 -11   5  -1   39.18    1.87
 -11   5  -1   39.09    1.99
  11   5   1   37.06    1.49
  11   5   1   37.71    1.26
 -13  -5  -1  172.56    4.51
  13  -5   1  172.02    4.92
  13  -5   1  172.60    4.63
 -13  -5  -1  167.55    5.06
 -13  -5  -1  168.77    4.68
  13  -5   1  169.90    4.31
 -13   5  -1  162.38    4.69
  13   5   1  165.13    3.95
 -13   5  -1  168.72    4.96
  13   5   1  160.78    3.91
 -13   5  -1  164.37    4.81
  13   5   1  166.96    4.38
 -13   5  -1  171.82    4.74
  13   5   1  157.09    3.96
  15  -5   1   10.65    0.85
  15  -5   1   11.53    1.04
 -15  -5  -1    9.29    1.29
  15  -5   1    7.69    1.04
 -15  -5  -1    8.99    1.01
 -15  -5  -1   12.05    1.03
 -15   5  -1   11.97    1.20
 -15   5  -1   11.23    1.24
 -15   5  -1   10.34    1.02
  15   5   1    9.91    0.89
  15   5   1    9.97    0.62
  15   5   1   13.17    0.98
 -15   5  -1   11.64    1.29
 -15   5  -1   10.89    1.37
  15   5   1    9.61    0.59
  17  -5   1   91.05    2.86
  17  -5   1   96.25    2.91
  17  -5   1   90.23    3.29
 -17  -5  -1   94.13    3.42
 -17  -5  -1   98.38    3.10
 -17  -5  -1   96.86    2.97
 -17   5  -1   89.28    3.25
  17   5   1   87.65    2.92
 -17   5  -1   90.32    3.42
 -17   5  -1   90.49    3.16
  17   5   1   88.27    2.33
  17   5   1   91.23    2.78
 -17   5  -1   85.47    3.12
 -17   5  -1   88.61    2.84
  17   5   1   88.64    2.30
  19  -5   1    9.03    0.96
  19  -5   1    9.93    0.94
  19  -5   1    8.28    1.24
 -19  -5  -1    8.72    0.98
 -19  -5  -1    8.02    1.20
 -19  -5  -1    7.30    0.98
 -19   5  -1   10.99    1.06
  19   5   1   13.18    1.26
  19   5   1   11.01    0.67
 -19   5  -1   13.60    1.60
 -19   5  -1   10.79    1.26
  19   5   1    9.62    0.60
 -19   5  -1    9.75    1.23
 -19   5  -1   11.32    1.32
  19   5   1   11.11    1.05
  21  -5   1   88.96    3.01
 -21  -5  -1   91.34    3.37
  21  -5   1   92.99    2.75
 -21  -5  -1   92.25    2.98
 -21  -5  -1   92.65    3.06
  21  -5   1   88.75    3.46
 -21   5  -1   96.97    3.46
  21   5   1   97.17    3.32
  21   5   1   93.22    2.51
 -21   5  -1   92.40    3.48
 -21   5  -1  100.20    3.79
 -21   5  -1  103.37    3.08
 -21   5  -1   94.61    3.44
  21   5   1   99.76    3.14
  23  -5   1   95.28    3.23
 -23  -5  -1   90.05    3.09
 -23  -5  -1   97.35    3.51
  23  -5   1   92.24    3.61
 -23  -5  -1   92.27    3.09
  23  -5   1   96.41    2.77
 -23   5  -1   84.65    2.72
 -23   5  -1   83.99    3.19
  23   5   1   75.84    2.98
 -23   5  -1   81.33    3.49
  23   5   1   85.23    2.87
  23   5   1   74.78    2.19
 -23   5  -1   81.81    3.18
  23   5   1   78.74    2.52
 -23   5  -1   79.35    3.19
 -25  -5  -1   40.26    2.22
  25  -5   1   38.09    2.00
  25  -5   1   34.78    2.25
  25  -5   1   39.60    1.49
 -25  -5  -1   34.37    1.84
 -25   5  -1   43.95    2.42
 -25   5  -1   39.53    2.31
 -25   5  -1   40.22    1.81
  25   5   1   38.82    1.65
  25   5   1   41.68    2.18
  25   5   1   41.92    1.97
 -25   5  -1   42.63    2.61
  25   5   1   40.38    1.44
 -25   5  -1   40.53    2.23
  27  -5   1  136.11    4.44
 -27  -5  -1  134.93    4.50
  27  -5   1  142.54    4.87
 -27  -5  -1  136.79    4.13
 -27   5  -1  130.63    4.89
 -27   5  -1  133.46    4.56
 -27   5  -1  137.32    4.65
  27   5   1  140.97    3.83
  27   5   1  136.73    4.25
  27   5   1  132.81    4.43
  27   5   1  132.28    3.51
 -27   5  -1  137.23    4.71
 -27   5  -1  133.03    3.89
 -29  -5  -1   20.53    1.51
  29  -5   1   17.93    1.93
 -29  -5  -1   20.44    1.86
  29  -5   1   22.08    1.93
  29   5   1   18.55    1.04
  29   5   1   20.40    1.24
 -29   5  -1   12.44    1.61
 -29   5  -1   14.88    1.91
 -29   5  -1   22.31    2.03
  29   5   1   19.69    1.84
 -29   5  -1   18.94    1.34
  29   5   1   19.73    1.54
 -29   5  -1   21.54    2.10
 -31  -5  -1   66.98    2.60
  31  -5   1   61.96    3.17
 -31  -5  -1   65.79    2.91
  31  -5   1   66.45    3.01
 -31   5  -1   63.62    3.09
  31   5   1   64.77    2.82
  31   5   1   71.40    2.59
  31   5   1   65.13    2.21
 -31   5  -1   59.35    3.16
 -31   5  -1   72.46    2.52
  31   5   1   63.21    2.91
 -31   5  -1   66.01    3.50
 -33  -5  -1    7.77    1.09
  33  -5   1    5.20    1.18
  33  -5   1    4.59    1.17
 -33  -5  -1    3.98    1.10
  33   5   1    9.69    1.35
 -33   5  -1    7.75    1.46
  33   5   1   10.87    1.46
 -33   5  -1   11.10    1.88
 -33   5  -1    8.86    1.54
  35  -5   1   39.80    2.43
  35  -5   1   37.08    2.56
 -35  -5  -1   36.93    2.20
  35   5   1   37.47    2.17
 -35   5  -1   38.11    2.64
 -35   5  -1   32.23    2.97
 -35   5  -1   39.84    2.77
  35   5   1   33.47    2.23
  37  -5   1   32.24    2.33
  37  -5   1   34.90    2.53
 -37  -5  -1   33.94    2.19
  37   5   1   45.48    2.47
 -37   5  -1   44.87    3.17
  37   5   1   40.01    2.48
 -37   5  -1   42.59    2.84
 -37   5  -1   41.33    2.97
  39  -5   1   21.19    1.52
  39  -5   1   20.43    2.15
 -39  -5  -1   19.23    1.84
  39  -5   1   22.84    2.39
  39   5   1   19.54    1.92
 -39   5  -1   16.90    2.17
  39   5   1   17.61    2.01
 -39   5  -1   18.77    2.41
 -39   5  -1   20.85    2.48
  41  -5   1   34.19    2.56
 -41  -5  -1   31.51    2.12
  41  -5   1   30.72    2.38
  41  -5   1   24.20    1.97
 -41   5  -1   36.82    3.17
 -41   5  -1   38.34    2.97
  41   5   1   33.70    2.52
 -41   5  -1   38.82    2.77
  41   5   1   34.97    2.37
  43  -5   1    1.63    0.87
  43  -5   1    1.07    1.01
  43  -5   1    0.21    0.98
  43   5   1    2.32    1.24
  43   5   1    2.23    1.07
 -43   5  -1   -1.57    1.30
 -43   5  -1    2.65    1.48
 -43   5  -1    2.42    1.48
  45  -5   1   38.06    2.75
  45  -5   1   37.02    2.81
  45  -5   1   39.61    2.54
  45   5   1   40.49    2.61
 -45   5  -1   33.97    3.39
 -45   5  -1   34.57    3.32
 -45   5  -1   35.40    2.93
  45   5   1   38.66    2.81
  47  -5   1   12.65    1.98
  47  -5   1    8.98    1.77
 -47   5  -1    9.62    2.19
 -47   5  -1    9.82    2.30
  47   5   1   10.36    1.69
  47   5   1   13.34    2.02
 -47   5  -1   11.68    2.11
  49  -5   1   33.08    3.14
  49  -5   1   36.54    3.26
 -49   5  -1   35.02    3.48
  49   5   1   25.25    2.67
 -49   5  -1   30.51    3.41
  49   5   1   35.99    2.66
 -49   5  -1   35.70    2.96
  51  -5   1   11.35    1.95
  51  -5   1   12.28    1.98
 -51   5  -1   13.21    2.27
  51   5   1   12.93    2.19
  51   5   1   13.95    2.03
 -51   5  -1   11.01    2.29
  53  -5   1   12.55    2.12
  53  -5   1   17.01    2.29
  53   5   1   16.02    2.38
  53   5   1   12.96    2.08
 -53   5  -1   13.79    2.64
 -53   5  -1   11.98    2.23
  55  -5   1   11.94    2.09
  55  -5   1   13.92    2.18
  55   5   1   16.08    2.24
 -55   5  -1   10.08    2.44
 -55   5  -1   11.53    2.20
  55   5   1   12.16    2.30
  57  -5   1   -0.20    1.22
  57  -5   1    0.25    1.23
  57   5   1    2.53    1.31
 -57   5  -1   -0.35    1.58
  57   5   1    1.97    1.47
 -57   5  -1   -0.40    1.42
  56  -6  -1    9.35    2.00
  56  -6  -1    7.54    1.92
 -56   6   1    8.81    2.12
  56   6  -1   10.24    2.21
 -56   6   1   14.65    2.75
  54  -6  -1   12.15    2.22
  54  -6  -1   13.59    2.17
 -54   6   1   11.72    2.20
  54   6  -1   11.13    2.08
 -54   6   1   14.28    2.88
 -54   6   1   10.84    3.25
  52  -6  -1   17.51    2.47
  52  -6  -1   15.43    2.31
 -52   6   1   16.62    2.55
 -52   6   1   24.14    3.35
 -52   6   1   15.02    2.63
  52   6  -1   17.25    2.44
  50  -6  -1    4.36    1.57
  50  -6  -1    7.51    1.78
 -50   6   1    9.32    2.38
 -50   6   1    4.00    1.74
  50   6  -1    3.77    1.65
 -50   6   1    9.95    2.29
  48  -6  -1   33.99    3.14
  48  -6  -1   26.07    2.80
  48   6  -1   21.84    2.57
 -48   6   1   21.45    3.11
 -48   6   1   22.90    2.84
 -48   6   1   18.73    2.76
  46  -6  -1   -1.58    0.95
  46  -6  -1   -0.61    1.10
 -46   6   1    2.06    1.74
 -46   6   1    1.30    1.48
 -46   6   1    0.99    1.42
  46   6  -1    1.34    1.28
  44  -6  -1   33.41    3.06
  44  -6  -1   34.84    3.10
 -44   6   1   31.44    3.27
  44   6  -1   34.47    3.04
 -44   6   1   29.34    3.36
 -44   6   1   34.52    3.27
 -42  -6   1    6.97    1.47
  42  -6  -1    5.75    1.54
  42  -6  -1    5.69    1.57
  42  -6  -1    6.54    1.30
 -42   6   1    9.92    2.27
  42   6  -1   12.05    1.97
  42   6  -1    5.26    1.40
 -42   6   1    8.30    1.93
 -42   6   1    6.80    1.84
  40  -6  -1   19.94    1.99
 -40  -6   1   17.17    1.98
  40  -6  -1   17.25    2.18
  40  -6  -1   21.06    2.44
 -40   6   1   22.31    2.69
 -40   6   1   23.35    2.82
  40   6  -1   25.46    1.92
 -40   6   1   18.42    2.63
  40   6  -1   23.22    2.40
 -38  -6   1   35.86    2.42
  38  -6  -1   31.06    2.23
  38  -6  -1   33.59    2.50
  38  -6  -1   32.85    2.61
  38   6  -1   28.93    2.58
  38   6  -1   30.98    1.99
 -38   6   1   28.21    2.86
 -38   6   1   32.02    3.10
 -38   6   1   24.88    2.85
  36  -6  -1    8.71    1.67
  36  -6  -1    7.34    1.36
  36  -6  -1    5.27    1.20
 -36  -6   1    7.20    1.45
 -36   6   1    6.18    1.63
 -36   6   1    5.64    1.69
 -36   6   1    6.31    1.19
  36   6  -1    3.71    1.25
  36   6  -1    6.27    1.11
 -36   6   1    7.62    1.68
  34  -6  -1   51.54    2.68
 -34  -6   1   52.34    2.83
  34  -6  -1   47.85    2.99
  34  -6  -1   52.84    2.85
 -34   6   1   46.88    3.10
 -34   6   1   51.95    3.40
 -34   6   1   43.09    2.91
  34   6  -1   43.65    2.65
  34   6  -1   52.08    2.39
 -34   6   1   47.25    2.38
  32  -6  -1   11.04    1.53
 -32  -6   1   10.51    1.57
  32  -6  -1   10.94    1.48
  32  -6  -1   13.91    1.84
  32   6  -1   12.84    1.33
 -32   6   1   13.78    1.53
  32   6  -1   15.88    1.82
 -32   6   1   11.55    1.72
 -32   6   1   11.74    1.93
 -32   6   1   13.51    2.14
 -30  -6   1   45.46    2.03
  30  -6  -1   44.79    2.70
  30  -6  -1   41.54    2.41
 -30  -6   1   41.81    2.57
  30  -6  -1   43.36    2.36
  30   6  -1   41.38    2.34
 -30   6   1   46.67    2.87
 -30   6   1   40.09    2.20
 -30   6   1   46.72    2.86
 -30   6   1   44.84    2.76
  30   6  -1   43.58    2.08
 -30   6   1   40.59    2.99
  28  -6  -1   15.37    1.61
  28  -6  -1   17.35    1.98
 -28  -6   1   16.42    1.83
 -28  -6   1   15.59    1.35
  28  -6  -1   17.14    1.82
 -28   6   1   15.55    1.78
 -28   6   1   17.42    1.60
 -28   6   1   17.19    1.92
 -28   6   1   17.71    1.98
  28   6  -1   15.22    1.23
  28   6  -1   16.56    1.69
 -28   6   1   13.76    1.92
 -26  -6   1   35.21    2.29
 -26  -6   1   32.36    1.71
  26  -6  -1   29.01    2.03
  26  -6  -1   31.28    2.23
  26  -6  -1   35.31    1.65
  26  -6  -1   33.23    1.95
 -26   6   1   27.60    2.18
 -26   6   1   24.40    2.50
  26   6  -1   25.94    1.47
 -26   6   1   27.48    1.81
 -26   6   1   23.67    2.19
  26   6  -1   24.52    1.75
 -26   6   1   26.72    2.08
  24  -6  -1   60.62    2.88
  24  -6  -1   53.58    2.38
 -24  -6   1   55.58    2.85
 -24  -6   1   51.73    2.21
  24  -6  -1   53.44    2.17
  24  -6  -1   54.09    2.64
 -24   6   1   47.09    2.63
 -24   6   1   48.18    2.29
 -24   6   1   49.13    2.66
  24   6  -1   46.97    1.92
 -24   6   1   45.41    2.84
  24   6  -1   47.27    2.29
 -24   6   1   45.68    2.56
 -22  -6   1   12.97    1.26
 -22  -6   1   12.91    1.69
  22  -6  -1   10.68    1.17
  22  -6  -1   12.84    1.27
  22  -6  -1   10.25    1.47
  22  -6  -1    9.00    1.24
 -22   6   1   11.68    1.55
 -22   6   1    8.07    1.49
  22   6  -1    9.69    0.95
 -22   6   1   10.48    1.47
  22   6  -1   12.17    1.32
 -22   6   1    8.12    1.30
 -22   6   1   10.94    1.29
  20  -6  -1  115.25    3.58
  20  -6  -1  116.37    3.60
  20  -6  -1  114.59    4.08
  20  -6  -1  108.83    3.92
 -20  -6   1  119.87    4.28
 -20  -6   1  115.90    3.60
 -20   6   1  122.00    4.55
 -20   6   1  121.64    4.32
  20   6  -1  123.99    3.48
  20   6  -1  124.17    3.85
 -20   6   1  120.47    3.95
 -20   6   1  123.55    4.23
 -20   6   1  116.54    4.21
  20   6  -1  120.42    3.41
  18  -6  -1    1.40    0.65
 -18  -6   1    1.74    0.69
  18  -6  -1    1.43    0.75
 -18  -6   1    0.75    0.83
 -18  -6   1    0.95    0.48
  18  -6  -1    0.67    0.50
  18  -6  -1    0.33    0.63
 -18   6   1    1.71    0.84
  18   6  -1    0.22    0.36
 -18   6   1    0.80    0.81
 -18   6   1    2.85    1.06
 -18   6   1    2.06    0.91
 -18   6   1    1.03    0.77
  18   6  -1    0.88    0.44
  18   6  -1    0.82    0.54
  16  -6  -1  164.72    5.01
  16  -6  -1  154.26    4.90
  16  -6  -1  166.13    4.70
  16  -6  -1  162.76    4.42
 -16  -6   1  160.25    5.19
 -16  -6   1  159.17    4.19
 -16  -6   1  166.96    4.65
  16   6  -1  163.82    4.41
 -16   6   1  173.89    5.27
 -16   6   1  171.03    5.11
  16   6  -1  166.68    4.17
 -16   6   1  166.40    4.88
 -16   6   1  161.64    5.36
 -16   6   1  172.73    5.10
  16   6  -1  167.49    4.66
 -14  -6   1   18.21    1.03
  14  -6  -1   17.59    1.35
  14  -6  -1   13.53    1.40
 -14  -6   1   20.95    1.93
 -14  -6   1   19.45    1.37
  14  -6  -1   17.23    1.58
  14  -6  -1   16.04    1.06
 -14   6   1   10.89    1.33
 -14   6   1   15.86    1.71
  14   6  -1   11.72    0.92
  14   6  -1   11.85    0.70
 -14   6   1   14.08    1.43
 -14   6   1   13.82    1.43
  14   6  -1   14.25    1.08
 -14   6   1   13.86    1.40
 -12  -6   1  125.24    3.83
  12  -6  -1  119.48    3.42
  12  -6  -1  124.15    3.90
  12  -6  -1  121.81    3.99
 -12  -6   1  126.17    3.35
 -12  -6   1  126.25    4.35
  12  -6  -1  123.18    4.04
  12  -6  -1  134.18    3.93
 -12   6   1  127.13    3.90
 -12   6   1  114.42    3.98
 -12   6   1  116.94    4.12
 -12   6   1  126.03    3.90
  12   6  -1  119.16    3.44
 -12   6   1  120.43    3.86
  12   6  -1  118.87    3.40
  12   6  -1  117.93    2.90
  10  -6  -1   78.86    2.83
  10  -6  -1   84.81    3.00
  10  -6  -1   80.44    2.46
 -10  -6   1   80.84    2.88
 -10  -6   1   80.00    2.40
 -10  -6   1   83.37    3.34
  10  -6  -1   84.88    3.04
  10  -6  -1   84.11    3.10
 -10   6   1   73.08    2.89
 -10   6   1   73.41    2.81
 -10   6   1   77.30    2.76
  10   6  -1   74.73    2.35
  10   6  -1   71.67    1.77
 -10   6   1   73.66    2.72
  10   6  -1   71.48    2.39
 -10   6   1   73.04    2.98
   8  -6  -1   15.26    1.50
   8  -6  -1   11.73    1.24
  -8  -6   1   15.71    1.39
   8  -6  -1   13.64    0.86
  -8  -6   1   11.89    1.49
  -8  -6   1   13.08    0.88
   8  -6  -1   14.40    1.37
   8  -6  -1   15.39    1.32
   8   6  -1   10.74    1.06
  -8   6   1    8.22    1.12
   8   6  -1    9.78    0.84
   8   6  -1   11.75    1.02
   8   6  -1   10.18    0.94
   8   6  -1   10.32    0.94
  -8   6   1   11.25    1.32
  -8   6   1   11.18    1.16
  -8   6   1   10.18    1.10
   8   6  -1   11.40    1.29
  -6  -6   1  115.72    4.07
  -6  -6   1  119.83    3.71
   6  -6  -1  118.55    3.84
   6  -6  -1  116.46    3.10
   6  -6  -1  113.97    3.51
   6  -6  -1  114.85    3.69
  -6  -6   1  120.71    3.17
   6  -6  -1  114.05    3.78
   6   6  -1  118.31    3.33
   6   6  -1  112.67    3.81
  -6   6   1  114.23    3.52
  -6   6   1  113.69    3.50
   6   6  -1  115.35    3.36
  -6   6   1  110.33    3.71
   6   6  -1  111.76    3.45
   6   6  -1  118.47    3.36
  -6   6   1  110.04    3.75
   6   6  -1  115.31    3.12
  -4  -6   1    2.25    0.50
  -4  -6   1    2.19    0.83
   4  -6  -1    1.59    0.66
   4  -6  -1    1.10    0.56
   4  -6  -1    2.05    0.74
  -4  -6   1    3.29    0.81
   4  -6  -1    2.57    0.75
  -4   6   1    2.18    0.81
   4   6  -1    3.16    0.50
  -4   6   1    0.96    0.53
  -4   6   1    2.38    0.64
   4   6  -1    3.10    0.87
  -4   6   1    2.65    0.64
   4   6  -1    2.93    0.60
   4   6  -1    3.19    0.66
   4   6  -1    3.64    0.74
  -4   6   1    3.01    0.77
   4   6  -1    2.73    0.61
  -2  -6   1  112.32    3.67
   2  -6  -1  120.14    3.48
  -2  -6   1  120.62    3.19
  -2  -6   1  117.46    3.42
   2  -6  -1  111.23    3.69
   2  -6  -1  111.98    3.83
  -2  -6   1  114.05    3.92
   2   6  -1  117.23    3.43
   2   6  -1  119.09    3.46
   2   6  -1  113.51    3.47
   2   6  -1  117.69    3.04
   2   6  -1  118.02    3.83
  -2   6   1  115.47    3.42
  -2   6   1  117.79    3.84
  -2   6   1  110.53    3.39
  -2   6   1  117.16    3.55
  -2   6   1  118.74    3.66
   2   6  -1  113.71    3.57
   0  -6  -1   41.88    2.18
   0  -6   1   41.45    1.58
   0  -6  -1   36.41    1.89
   0  -6   1   40.95    1.76
   0  -6   1   42.85    2.20
   0  -6   1   38.34    1.94
   0  -6  -1   43.55    1.80
   0   6   1   40.93    2.03
   0   6   1   42.63    1.74
   0   6  -1   40.56    1.83
   0   6   1   43.55    1.81
   0   6   1   44.69    1.94
   0   6  -1   43.51    2.07
   0   6   1   41.39    1.19
   0   6   1   42.84    1.74
   0   6  -1   44.37    1.83
   0   6  -1   46.40    2.00
   0   6  -1   42.75    1.83
   0   6  -1   44.12    1.42
   2  -6   1   56.57    2.53
  -2  -6  -1   55.44    2.39
   2  -6   1   56.11    1.98
  -2  -6  -1   55.16    2.51
   2  -6   1   59.66    2.23
  -2  -6  -1   57.26    2.10
  -2   6  -1   40.22    1.95
   2   6   1   43.41    1.70
  -2   6  -1   44.12    1.97
   2   6   1   41.32    1.75
  -2   6  -1   41.97    1.36
  -2   6  -1   43.38    1.85
   2   6   1   42.01    1.84
  -2   6  -1   46.48    1.92
   2   6   1   44.66    2.14
   2   6   1   46.14    1.73
  -2   6  -1   44.50    2.14
   2   6   1   43.30    1.30
   4  -6   1  100.89    3.27
   4  -6   1  101.20    3.01
   4  -6   1  101.29    3.48
  -4  -6  -1  103.97    3.12
  -4  -6  -1  106.53    3.72
  -4  -6  -1  101.70    3.40
   4  -6   1  105.99    3.57
   4   6   1  114.08    3.30
   4   6   1  108.06    3.10
  -4   6  -1  113.46    3.44
   4   6   1  107.33    3.17
   4   6   1  109.24    2.80
  -4   6  -1  109.67    2.75
  -4   6  -1  105.42    3.62
   4   6   1  103.14    3.61
  -4   6  -1  108.00    3.40
   4   6   1  118.17    3.16
  -4   6  -1  110.47    3.60
   6  -6   1   14.64    0.63
   6  -6   1   16.43    1.09
   6  -6   1   13.90    1.34
  -6  -6  -1   14.72    1.35
  -6  -6  -1   17.66    1.75
  -6  -6  -1   15.66    1.14
   6  -6   1   12.95    1.34
   6  -6   1   14.94    1.32
   6   6   1    8.88    0.67
  -6   6  -1   11.72    1.28
  -6   6  -1    9.86    1.10
  -6   6  -1    8.16    1.00
   6   6   1    9.04    0.79
  -6   6  -1    7.85    0.56
   6   6   1    9.11    0.82
   6   6   1    8.82    0.80
  -6   6  -1    7.88    1.10
   6   6   1    8.66    1.16
   6   6   1   11.36    1.00
   8  -6   1  176.57    5.27
   8  -6   1  181.62    5.15
   8  -6   1  183.81    4.32
  -8  -6  -1  182.38    4.83
   8  -6   1  188.20    5.28
  -8  -6  -1  190.21    5.24
  -8  -6  -1  184.43    5.55
   8   6   1  185.15    5.31
   8   6   1  178.39    4.47
  -8   6  -1  179.99    5.29
  -8   6  -1  181.85    5.30
  -8   6  -1  183.34    5.08
   8   6   1  172.46    4.49
   8   6   1  183.24    4.58
   8   6   1  180.67    4.64
   8   6   1  178.16    4.51
  -8   6  -1  174.40    5.02
 -10  -6  -1    3.78    0.74
 -10  -6  -1    4.79    0.84
  10  -6   1    3.39    0.81
  10  -6   1    3.78    0.48
  10  -6   1    4.51    0.99
  10  -6   1    5.67    0.97
 -10  -6  -1    3.48    1.06
 -10   6  -1    2.44    0.80
 -10   6  -1    3.48    0.85
 -10   6  -1    3.02    0.83
  10   6   1    2.34    0.46
  10   6   1    2.87    0.79
  10   6   1    2.88    0.51
  10   6   1    3.53    0.54
  10   6   1    3.07    0.56
 -10   6  -1    3.77    0.91
  10   6   1    3.61    0.57
 -12  -6  -1  133.45    4.07
  12  -6   1  133.83    4.18
 -12  -6  -1  124.59    4.40
  12  -6   1  130.23    4.28
 -12  -6  -1  132.83    3.76
  12  -6   1  129.08    3.39
  12  -6   1  131.36    4.01
 -12   6  -1  114.25    3.77
  12   6   1  116.18    3.07
 -12   6  -1  113.00    3.90
  12   6   1  115.98    3.10
 -12   6  -1  118.21    4.05
 -12   6  -1  118.10    3.80
  12   6   1  113.81    3.15
  12   6   1  113.30    3.28
  14  -6   1   37.19    2.09
 -14  -6  -1   38.37    2.29
 -14  -6  -1   34.91    1.68
 -14  -6  -1   37.14    1.86
  14  -6   1   35.74    1.80
  14  -6   1   35.58    1.43
  14  -6   1   40.47    2.09
  14   6   1   38.54    1.43
  14   6   1   36.86    1.36
  14   6   1   36.15    1.62
 -14   6  -1   34.25    1.98
  14   6   1   37.09    1.51
 -14   6  -1   37.16    2.03
 -14   6  -1   38.92    2.24
 -14   6  -1   36.89    2.04
 -16  -6  -1   86.28    3.10
  16  -6   1   88.23    3.34
 -16  -6  -1   91.23    3.58
  16  -6   1   85.33    2.96
 -16  -6  -1   86.26    2.86
  16  -6   1   91.59    3.42
  16  -6   1   85.50    2.67
  16   6   1   77.06    2.28
 -16   6  -1   77.79    3.14
  16   6   1   74.15    2.23
  16   6   1   79.03    2.53
 -16   6  -1   82.99    3.15
 -16   6  -1   83.21    3.38
  16   6   1   81.37    2.72
 -16   6  -1   77.39    2.82
 -16   6  -1   84.48    3.12
  18  -6   1   56.67    2.74
  18  -6   1   60.29    2.31
 -18  -6  -1   58.36    2.28
  18  -6   1   58.80    2.16
 -18  -6  -1   63.28    2.92
  18  -6   1   60.37    2.75
 -18  -6  -1   59.52    2.47
  18   6   1   61.26    1.93
 -18   6  -1   63.13    2.78
 -18   6  -1   61.29    2.73
 -18   6  -1   67.45    2.93
  18   6   1   65.71    2.31
 -18   6  -1   69.79    2.57
  18   6   1   65.72    1.98
  18   6   1   63.90    2.46
 -18   6  -1   71.61    3.16
 -20  -6  -1   33.31    1.86
  20  -6   1   37.81    2.22
  20  -6   1   35.49    2.16
 -20  -6  -1   33.21    1.76
  20  -6   1   34.55    1.66
 -20  -6  -1   39.25    2.34
  20  -6   1   32.66    1.64
 -20   6  -1   37.25    2.18
  20   6   1   35.60    1.68
 -20   6  -1   36.71    2.40
  20   6   1   36.67    1.89
  20   6   1   37.64    1.35
 -20   6  -1   42.15    2.30
 -20   6  -1   36.36    1.86
 -20   6  -1   39.40    2.20
  22  -6   1   47.92    1.97
  22  -6   1   49.16    2.11
 -22  -6  -1   48.13    2.14
  22  -6   1   52.90    2.69
 -22  -6  -1   53.72    2.73
  22  -6   1   50.74    2.61
 -22  -6  -1   48.96    2.26
 -22   6  -1   53.09    2.63
 -22   6  -1   59.05    3.01
  22   6   1   53.81    1.74
  22   6   1   50.63    2.34
  22   6   1   55.39    2.21
 -22   6  -1   50.48    2.59
 -22   6  -1   57.80    2.35
 -22   6  -1   54.49    2.75
  24  -6   1    3.55    0.83
  24  -6   1    1.94    0.66
 -24  -6  -1    2.00    0.77
 -24  -6  -1    4.39    0.96
  24  -6   1    2.31    0.90
 -24  -6  -1    3.86    1.22
  24  -6   1    2.65    0.97
  24   6   1    1.83    0.77
 -24   6  -1    1.99    1.13
 -24   6  -1    1.75    0.90
 -24   6  -1   -0.05    0.81
 -24   6  -1    2.56    0.93
  24   6   1    2.23    0.73
 -24   6  -1    2.44    0.76
  24   6   1    1.83    0.44
 -26  -6  -1   66.42    2.73
  26  -6   1   66.28    3.10
  26  -6   1   64.97    2.72
  26  -6   1   70.01    3.29
 -26  -6  -1   68.73    3.14
 -26   6  -1   57.27    3.27
 -26   6  -1   60.49    2.44
  26   6   1   65.47    2.25
 -26   6  -1   61.24    2.96
  26   6   1   64.77    2.82
 -26   6  -1   55.16    2.89
  26   6   1   57.44    2.45
  26   6   1   59.94    1.94
 -26   6  -1   62.85    3.04
 -28  -6  -1   20.63    1.98
  28  -6   1   20.25    2.09
  28  -6   1   23.17    2.11
  28  -6   1   20.34    1.78
 -28  -6  -1   20.34    1.55
 -28   6  -1   18.14    1.98
  28   6   1   15.81    0.97
 -28   6  -1   17.12    1.48
  28   6   1   17.31    1.78
  28   6   1   18.40    1.60
 -28   6  -1   14.86    1.79
 -28   6  -1   18.97    1.97
 -28   6  -1   19.31    2.17
  30  -6   1   25.52    1.92
 -30  -6  -1   26.95    2.08
  30  -6   1   22.96    2.10
 -30  -6  -1   26.80    1.79
  30  -6   1   24.86    2.38
 -30   6  -1   20.67    2.11
 -30   6  -1   20.39    2.34
  30   6   1   23.77    2.13
 -30   6  -1   18.89    2.09
  30   6   1   23.90    1.66
 -30   6  -1   22.39    1.53
  32  -6   1   50.56    2.77
  32  -6   1   53.74    2.74
 -32  -6  -1   53.20    2.82
 -32  -6  -1   50.93    2.39
  32  -6   1   53.11    3.09
 -32   6  -1   56.57    3.15
 -32   6  -1   57.72    3.19
 -32   6  -1   56.94    3.22
 -32   6  -1   53.86    3.41
  32   6   1   57.69    2.94
  32   6   1   58.30    2.62
 -34  -6  -1    4.80    1.03
  34  -6   1    3.74    1.32
  34  -6   1    4.90    1.17
  34  -6   1    2.72    1.13
 -34  -6  -1    3.82    1.30
 -34   6  -1    2.39    1.30
 -34   6  -1    4.94    1.55
  34   6   1    3.69    0.93
  34   6   1    5.28    1.28
 -34   6  -1    1.83    1.40
 -36  -6  -1   58.86    2.91
  36  -6   1   51.56    2.84
  36  -6   1   46.22    2.80
  36  -6   1   51.95    3.17
  36   6   1   47.45    2.46
 -36   6  -1   47.73    3.09
 -36   6  -1   41.81    3.28
 -36   6  -1   50.12    3.18
  36   6   1   46.06    2.68
  38  -6   1    4.61    1.26
  38  -6   1    7.91    1.51
 -38  -6  -1    6.11    1.38
  38  -6   1    5.25    1.50
 -38   6  -1    3.53    1.52
  38   6   1    6.78    1.26
 -38   6  -1    7.06    1.90
 -38   6  -1    6.71    1.65
  38   6   1    5.41    1.40
 -40  -6  -1   37.68    2.52
  40  -6   1   40.94    2.52
  40  -6   1   35.15    2.77
  40  -6   1   35.79    2.60
 -40   6  -1   44.18    3.45
 -40   6  -1   34.89    2.91
  40   6   1   32.81    2.31
  40   6   1   39.47    2.70
 -40   6  -1   33.96    3.23
  42  -6   1   18.49    2.28
 -42  -6  -1   22.51    2.17
  42  -6   1   22.57    2.18
  42  -6   1   19.69    2.28
 -42   6  -1   17.83    2.69
  42   6   1   19.04    1.98
 -42   6  -1   15.90    2.39
  42   6   1   18.82    2.25
 -42   6  -1   19.64    2.78
  44  -6   1   27.66    2.81
  44  -6   1   25.63    2.36
  44  -6   1   27.53    2.62
 -44   6  -1   30.32    3.04
  44   6   1   29.05    2.75
  44   6   1   31.47    2.38
 -44   6  -1   32.87    3.44
 -44   6  -1   32.17    3.47
  46  -6   1   20.24    2.35
  46  -6   1   14.10    2.24
  46   6   1   16.03    2.22
 -46   6  -1   21.79    3.04
  46   6   1   21.53    2.19
 -46   6  -1   21.18    2.68
 -46   6  -1   17.52    2.61
  48  -6   1    7.89    1.68
  48  -6   1    7.65    1.82
  48   6   1   10.83    1.73
 -48   6  -1    7.63    2.14
  48   6   1    9.89    1.89
 -48   6  -1   10.19    2.49
 -48   6  -1    7.07    1.99
  50  -6   1   22.15    2.69
  50  -6   1   22.61    2.57
 -50   6  -1   19.01    2.70
 -50   6  -1   22.83    3.13
  50   6   1   22.55    2.62
 -50   6  -1   22.59    3.27
  50   6   1   18.80    2.43
  52  -6   1    0.67    1.27
  52  -6   1   -0.35    1.20
 -52   6  -1   -0.16    1.58
  52   6   1    0.74    1.25
 -52   6  -1   -0.25    1.70
  54  -6   1   10.62    2.07
  54  -6   1   14.67    2.40
  54   6   1   16.92    2.51
 -54   6  -1   12.02    2.63
 -54   6  -1   14.16    2.46
  53  -7  -1   20.36    2.69
  53  -7  -1   22.95    2.87
 -53   7   1   15.11    2.60
 -53   7   1   25.30    3.59
 -53   7   1   18.90    3.10
  53   7  -1   21.17    2.74
  51  -7  -1    1.15    1.43
  51  -7  -1    0.43    1.42
 -51   7   1    4.01    1.88
 -51   7   1    0.20    1.64
 -51   7   1    4.66    2.21
  51   7  -1    3.36    1.59
  49  -7  -1   18.34    2.57
  49  -7  -1   17.92    2.46
  49   7  -1   12.95    2.18
 -49   7   1   16.47    2.79
 -49   7   1   13.79    2.62
 -49   7   1   12.73    2.36
  47  -7  -1   12.60    2.24
  47  -7  -1   11.51    2.09
  47   7  -1   12.77    2.12
 -47   7   1   13.04    2.39
 -47   7   1   14.51    2.61
 -47   7   1   13.37    2.53
  45  -7  -1    9.35    2.00
  45  -7  -1    5.86    1.62
 -45   7   1    6.53    2.06
 -45   7   1    3.49    1.97
 -45   7   1    8.98    2.30
  45   7  -1    7.39    1.83
  43  -7  -1   27.58    2.92
  43  -7  -1   29.28    2.83
 -43  -7   1   33.33    2.81
 -43   7   1   34.34    3.60
 -43   7   1   25.69    3.06
  43   7  -1   33.07    2.99
 -43   7   1   22.78    3.00
  41  -7  -1    0.30    1.21
 -41  -7   1    1.58    1.39
  41  -7  -1    1.56    1.07
  41  -7  -1   -0.03    1.00
 -41   7   1    1.71    1.65
  41   7  -1    0.86    1.18
 -41   7   1    2.63    1.67
 -41   7   1   -1.04    1.48
  39  -7  -1   45.59    2.87
  39  -7  -1   39.86    2.60
 -39  -7   1   42.90    2.98
  39  -7  -1   39.35    3.07
 -39   7   1   46.35    3.60
 -39   7   1   48.91    3.39
  39   7  -1   44.89    2.96
 -39   7   1   42.20    3.41
  37  -7  -1    0.95    1.14
  37  -7  -1    1.64    1.05
 -37  -7   1    2.60    1.34
  37  -7  -1    3.33    1.18
  37   7  -1    1.13    1.14
 -37   7   1    2.29    1.56
 -37   7   1    1.98    1.42
 -37   7   1   -0.15    1.33
  35  -7  -1   17.43    2.04
 -35  -7   1   19.44    2.26
  35  -7  -1   21.47    2.15
  35  -7  -1   19.83    2.33
 -35   7   1   20.22    2.68
  35   7  -1   25.91    2.43
 -35   7   1   26.23    2.02
 -35   7   1   25.29    2.77
 -35   7   1   27.96    2.87
  33  -7  -1   40.51    2.86
  33  -7  -1   38.76    2.43
 -33  -7   1   40.55    2.70
  33  -7  -1   31.82    2.45
 -33   7   1   29.36    2.91
 -33   7   1   36.88    2.25
  33   7  -1   33.93    2.39
 -33   7   1   33.99    3.10
 -33   7   1   35.55    2.84
  31  -7  -1   13.71    1.83
  31  -7  -1   11.16    1.49
  31  -7  -1    9.07    1.72
 -31  -7   1   11.42    1.85
 -31   7   1   12.83    2.10
  31   7  -1   12.60    1.66
 -31   7   1   11.71    1.98
 -31   7   1   11.66    1.86
 -31   7   1   11.81    1.56
  29  -7  -1   60.87    2.81
 -29  -7   1   60.83    2.57
 -29  -7   1   61.84    3.27
  29  -7  -1   66.44    3.24
  29  -7  -1   58.93    3.20
 -29   7   1   58.83    3.22
 -29   7   1   59.56    3.36
 -29   7   1   60.82    3.28
 -29   7   1   59.52    3.67
  29   7  -1   56.55    2.83
 -29   7   1   62.24    2.89
  27  -7  -1    0.85    1.02
 -27  -7   1    2.16    0.82
 -27  -7   1    1.53    1.09
  27  -7  -1    1.26    1.00
  27  -7  -1    1.41    0.79
 -27   7   1    2.59    1.01
 -27   7   1    2.84    1.11
 -27   7   1    2.51    1.12
 -27   7   1    1.07    1.15
 -27   7   1    3.25    1.44
  27   7  -1    2.12    0.89
  25  -7  -1   42.16    2.47
  25  -7  -1   40.04    2.58
 -25  -7   1   45.16    2.14
 -25  -7   1   42.07    2.73
  25  -7  -1   41.63    2.12
  25  -7  -1   43.92    2.08
 -25   7   1   30.03    2.58
 -25   7   1   30.58    2.00
 -25   7   1   32.49    2.39
  25   7  -1   28.55    1.93
 -25   7   1   37.32    2.54
 -25   7   1   28.21    2.33
  23  -7  -1    3.84    0.87
 -23  -7   1    5.67    1.08
 -23  -7   1    5.88    1.43
  23  -7  -1    4.17    0.95
  23  -7  -1    3.75    1.13
  23  -7  -1    5.60    1.27
 -23   7   1    3.57    1.16
 -23   7   1    3.12    1.01
 -23   7   1    4.95    1.37
  23   7  -1    4.33    0.96
 -23   7   1    5.07    1.46
 -23   7   1    2.46    1.06
  21  -7  -1   48.26    2.63
  21  -7  -1   43.88    2.02
 -21  -7   1   46.50    2.22
  21  -7  -1   42.33    2.53
  21  -7  -1   47.78    2.24
 -21  -7   1   46.06    2.81
  21   7  -1   41.39    2.03
 -21   7   1   37.16    2.45
 -21   7   1   43.96    2.63
 -21   7   1   38.77    2.14
 -21   7   1   34.14    2.60
 -21   7   1   38.14    2.38
 -19  -7   1   35.71    2.50
  19  -7  -1   35.00    2.26
  19  -7  -1   35.05    2.27
 -19  -7   1   35.99    1.60
  19  -7  -1   34.26    1.92
  19  -7  -1   35.39    1.73
 -19  -7   1   39.72    2.04
 -19   7   1   34.76    2.32
 -19   7   1   27.68    2.03
 -19   7   1   31.50    1.93
 -19   7   1   32.96    2.17
  19   7  -1   34.13    1.81
 -19   7   1   29.24    2.37
  17  -7  -1   66.90    3.04
 -17  -7   1   68.09    2.79
 -17  -7   1   66.53    2.27
 -17  -7   1   68.65    3.33
  17  -7  -1   69.62    2.76
  17  -7  -1   65.21    2.40
  17  -7  -1   66.13    2.95
 -17   7   1   64.09    3.24
 -17   7   1   67.77    3.00
 -17   7   1   61.71    2.70
 -17   7   1   60.93    2.87
  17   7  -1   63.86    2.45
 -17   7   1   59.95    2.99
 -15  -7   1   70.87    3.31
  15  -7  -1   73.22    3.15
  15  -7  -1   69.95    2.88
 -15  -7   1   71.40    2.83
  15  -7  -1   72.81    3.10
 -15  -7   1   73.97    2.36
  15  -7  -1   69.91    2.43
  15  -7  -1   70.74    2.87
 -15   7   1   61.25    2.93
  15   7  -1   61.33    2.36
 -15   7   1   56.46    2.71
 -15   7   1   61.97    2.81
 -15   7   1   58.51    3.07
  15   7  -1   66.09    2.36
 -15   7   1   61.10    2.73
  13  -7  -1    7.76    0.85
 -13  -7   1    9.01    1.54
  13  -7  -1    7.74    1.20
 -13  -7   1    9.03    1.22
  13  -7  -1    9.14    1.18
  13  -7  -1    8.60    1.36
 -13  -7   1    7.56    0.83
  13  -7  -1    9.76    1.36
 -13   7   1    6.35    1.23
 -13   7   1    7.16    1.12
 -13   7   1    9.25    1.29
  13   7  -1    6.27    0.86
  13   7  -1    7.05    0.85
  13   7  -1    7.59    0.92
 -13   7   1    7.20    1.19
  13   7  -1    7.46    1.20
  13   7  -1    5.95    0.89
 -13   7   1    6.27    1.19
  11  -7  -1   98.97    3.48
 -11  -7   1  103.66    3.00
  11  -7  -1  100.80    3.67
  11  -7  -1  105.89    3.86
  11  -7  -1  109.72    3.76
 -11  -7   1  104.59    4.14
 -11  -7   1  109.46    3.64
  11  -7  -1  103.01    3.00
 -11   7   1  113.91    3.82
 -11   7   1  102.10    3.98
 -11   7   1  106.27    3.81
  11   7  -1  113.04    3.35
  11   7  -1  109.61    3.49
  11   7  -1  115.01    4.00
 -11   7   1  107.48    3.96
 -11   7   1  105.68    3.72
  11   7  -1  109.49    3.36
  11   7  -1  106.50    3.22
  -9  -7   1    6.02    0.75
   9  -7  -1    4.49    0.88
  -9  -7   1    5.94    1.32
   9  -7  -1    4.55    1.06
   9  -7  -1    5.58    1.02
   9  -7  -1    5.68    0.67
   9  -7  -1    5.23    1.01
  -9  -7   1    6.45    1.10
  -9   7   1    5.95    1.05
   9   7  -1    5.24    0.71
   9   7  -1    6.03    1.10
  -9   7   1    5.48    1.16
   9   7  -1    4.17    0.82
  -9   7   1    3.86    0.95
   9   7  -1    5.77    0.85
  -9   7   1    5.90    1.15
  -9   7   1    4.50    0.91
   9   7  -1    5.02    0.80
  -7  -7   1   98.48    3.46
   7  -7  -1   93.93    3.25
   7  -7  -1   94.52    3.44
   7  -7  -1   90.63    3.54
   7  -7  -1  100.57    3.59
  -7  -7   1   94.68    3.80
  -7  -7   1   98.41    2.84
  -7   7   1   89.87    3.47
  -7   7   1   88.83    3.21
   7   7  -1   93.69    3.03
   7   7  -1   90.59    3.01
  -7   7   1   93.07    3.53
   7   7  -1   90.26    3.52
   7   7  -1   88.45    3.14
   7   7  -1   95.52    2.75
  -7   7   1   93.34    3.26
   5  -7  -1  119.76    4.15
  -5  -7   1  127.74    3.49
  -5  -7   1  121.60    4.47
   5  -7  -1  127.28    3.87
   5  -7  -1  126.94    4.31
  -5  -7   1  127.02    4.13
   5   7  -1  122.64    3.31
   5   7  -1  125.46    3.91
   5   7  -1  121.51    3.71
  -5   7   1  121.17    3.84
  -5   7   1  123.87    3.89
   5   7  -1  127.62    3.74
  -5   7   1  121.70    4.23
   5   7  -1  120.65    4.21
  -5   7   1  117.07    4.06
  -3  -7   1   61.27    2.13
   3  -7  -1   62.12    2.39
   3  -7  -1   60.13    2.71
  -3  -7   1   61.80    2.67
  -3  -7   1   61.79    2.96
   3  -7  -1   59.26    2.74
   3   7  -1   61.50    1.96
  -3   7   1   62.70    2.68
   3   7  -1   64.00    2.60
  -3   7   1   63.41    2.86
   3   7  -1   59.13    2.40
   3   7  -1   61.68    2.40
  -3   7   1   62.81    2.46
  -3   7   1   70.70    2.54
   3   7  -1   62.67    2.83
  -1  -7   1  105.13    3.03
  -1  -7   1   97.62    3.56
   1  -7  -1   94.72    3.54
   1  -7  -1  103.38    3.28
  -1  -7   1  101.71    3.89
   1  -7  -1   98.88    3.74
  -1   7   1  108.43    3.47
   1   7  -1  112.53    2.95
   1   7  -1  114.74    3.57
   1   7  -1  113.71    3.56
  -1   7   1  105.93    3.68
   1   7  -1  106.58    3.91
   1   7  -1  113.54    3.73
  -1   7   1  112.80    3.93
  -1   7   1  113.44    3.50
   1  -7   1    6.57    0.84
  -1  -7  -1    7.50    0.98
   1  -7   1    8.81    1.27
   1  -7   1    6.05    0.96
  -1  -7  -1    7.06    1.28
  -1  -7  -1    7.59    1.21
   1  -7   1    4.86    1.10
   1   7   1    7.08    0.88
   1   7   1    7.64    1.23
  -1   7  -1    9.24    1.10
   1   7   1    8.52    1.08
  -1   7  -1    8.83    0.66
   1   7   1    8.11    0.97
  -1   7  -1    8.55    1.15
  -1   7  -1    6.35    1.09
  -1   7  -1    7.46    1.00
  -3  -7  -1  123.12    4.02
  -3  -7  -1  110.70    4.11
   3  -7   1  112.37    3.37
   3  -7   1  113.09    3.67
   3  -7   1  119.23    4.14
   3  -7   1  116.78    3.99
  -3  -7  -1  110.87    3.48
   3   7   1  107.90    3.86
   3   7   1  108.85    3.28
  -3   7  -1  109.87    3.77
  -3   7  -1  100.61    3.47
   3   7   1  105.72    3.27
   3   7   1  107.96    3.49
  -3   7  -1  104.27    3.83
  -3   7  -1  110.57    3.56
  -5  -7  -1   31.79    1.63
   5  -7   1   30.62    1.76
  -5  -7  -1   29.63    1.90
  -5  -7  -1   30.76    2.09
   5  -7   1   30.01    1.53
   5  -7   1   29.99    2.00
   5  -7   1   28.09    1.83
  -5   7  -1   25.98    1.81
   5   7   1   27.75    1.43
  -5   7  -1   29.77    1.90
   5   7   1   26.93    1.57
  -5   7  -1   26.97    1.69
   5   7   1   28.31    1.12
  -5   7  -1   26.15    1.66
   5   7   1   26.20    1.41
   5   7   1   30.08    1.95
  -7  -7  -1   92.92    3.75
  -7  -7  -1   97.19    3.09
   7  -7   1   91.15    3.31
   7  -7   1   97.83    3.09
  -7  -7  -1   94.81    3.47
   7  -7   1   89.01    3.48
   7  -7   1   98.30    3.62
   7   7   1   88.53    2.53
  -7   7  -1   93.55    3.28
   7   7   1   92.29    2.97
   7   7   1   86.50    2.99
   7   7   1   88.21    2.79
  -7   7  -1   89.33    3.48
  -7   7  -1   87.67    3.46
   7   7   1   88.26    2.79
  -7   7  -1   91.69    3.26
   7   7   1   89.98    3.47
  -9  -7  -1   66.74    2.77
   9  -7   1   67.85    2.91
  -9  -7  -1   70.74    3.27
  -9  -7  -1   67.86    2.48
   9  -7   1   67.89    2.82
   9  -7   1   65.74    2.75
   9  -7   1   68.22    2.52
  -9   7  -1   56.68    2.48
  -9   7  -1   61.89    2.81
   9   7   1   57.14    2.09
   9   7   1   58.40    2.18
  -9   7  -1   55.73    2.72
   9   7   1   57.27    1.93
   9   7   1   57.13    2.72
   9   7   1   54.85    2.04
  -9   7  -1   60.15    2.60
  11  -7   1   22.53    1.68
 -11  -7  -1   22.46    1.43
 -11  -7  -1   25.33    1.68
  11  -7   1   25.99    1.56
  11  -7   1   25.56    1.88
 -11  -7  -1   19.78    2.02
  11  -7   1   24.75    1.73
 -11   7  -1   18.37    1.66
  11   7   1   18.96    1.61
  11   7   1   18.29    1.10
 -11   7  -1   16.36    1.65
  11   7   1   19.36    1.21
 -11   7  -1   21.31    1.81
 -11   7  -1   19.35    1.71
  11   7   1   20.13    1.14
  11   7   1   18.37    1.12
  13  -7   1   45.26    2.45
 -13  -7  -1   40.71    2.51
 -13  -7  -1   45.44    2.01
 -13  -7  -1   43.87    2.25
  13  -7   1   46.05    2.35
  13  -7   1   43.83    2.22
  13   7   1   36.47    1.57
  13   7   1   34.97    1.49
 -13   7  -1   33.98    2.30
  13   7   1   35.18    2.10
  13   7   1   34.90    1.50
 -13   7  -1   36.92    2.14
 -13   7  -1   32.19    2.04
  13   7   1   37.82    1.62
 -13   7  -1   38.22    2.28
  15  -7   1    2.78    0.54
 -15  -7  -1    1.96    1.15
 -15  -7  -1    0.93    0.69
  15  -7   1    2.45    0.91
  15  -7   1    2.37    0.83
  15  -7   1    2.32    0.91
 -15  -7  -1    1.78    0.87
  15   7   1    1.80    0.46
  15   7   1    1.00    0.54
  15   7   1    1.16    0.49
 -15   7  -1    1.28    0.73
 -15   7  -1    1.45    0.88
 -15   7  -1    2.01    1.02
  15   7   1    1.19    0.85
 -15   7  -1    1.03    0.79
 -15   7  -1    1.33    0.90
  15   7   1    0.94    0.46
  17  -7   1   72.70    2.37
  17  -7   1   69.98    3.12
  17  -7   1   74.71    3.29
 -17  -7  -1   68.10    3.37
 -17  -7  -1   74.91    2.67
 -17  -7  -1   73.99    2.99
  17  -7   1   68.37    2.80
 -17   7  -1   76.12    3.46
 -17   7  -1   74.02    3.10
  17   7   1   72.72    2.61
 -17   7  -1   69.63    3.11
  17   7   1   70.52    2.26
 -17   7  -1   69.30    2.83
  17   7   1   70.91    2.29
 -17   7  -1   71.34    3.21
 -19  -7  -1   10.40    1.18
  19  -7   1   13.00    1.38
 -19  -7  -1    9.59    1.30
 -19  -7  -1   11.06    1.75
  19  -7   1   11.92    1.08
  19  -7   1   11.92    1.65
  19  -7   1   10.44    1.47
 -19   7  -1   14.61    1.82
  19   7   1   13.02    0.90
 -19   7  -1   15.51    1.50
 -19   7  -1   15.24    1.73
 -19   7  -1   14.23    1.72
  19   7   1   13.20    0.94
 -19   7  -1   15.26    1.70
  19   7   1   11.87    1.23
  21  -7   1   82.07    3.59
 -21  -7  -1   81.26    2.99
  21  -7   1   84.28    3.64
  21  -7   1   82.60    2.82
 -21  -7  -1   89.04    3.31
 -21  -7  -1   88.48    3.81
  21  -7   1   83.10    3.02
 -21   7  -1   81.51    3.54
  21   7   1   85.02    3.10
 -21   7  -1   84.27    3.90
 -21   7  -1   85.57    3.61
 -21   7  -1   89.90    3.66
  21   7   1   87.90    2.53
 -21   7  -1   86.19    3.19
  21   7   1   86.92    2.57
  23  -7   1   14.65    1.31
  23  -7   1   13.49    1.35
  23  -7   1   10.66    1.56
 -23  -7  -1   11.81    1.31
  23  -7   1   12.78    1.69
 -23  -7  -1   12.66    1.81
 -23  -7  -1   13.17    1.50
 -23   7  -1   19.33    1.96
 -23   7  -1   15.93    1.84
  23   7   1   18.55    1.00
 -23   7  -1   19.76    1.96
  23   7   1   20.19    1.55
 -23   7  -1   19.67    1.56
  23   7   1   18.28    1.07
 -23   7  -1   17.26    2.09
 -25  -7  -1   24.44    1.86
  25  -7   1   22.29    2.18
 -25  -7  -1   21.88    1.60
  25  -7   1   26.23    2.42
  25  -7   1   25.65    1.61
 -25  -7  -1   28.14    2.47
 -25   7  -1   26.30    1.76
  25   7   1   27.68    1.19
 -25   7  -1   26.51    2.14
 -25   7  -1   26.28    2.65
  25   7   1   28.10    1.83
 -25   7  -1   29.93    2.23
 -25   7  -1   28.35    2.28
 -27  -7  -1   50.59    2.85
  27  -7   1   52.35    3.03
  27  -7   1   47.80    2.88
 -27  -7  -1   52.87    2.55
  27  -7   1   52.11    2.39
 -27   7  -1   59.37    3.49
 -27   7  -1   54.44    3.11
 -27   7  -1   53.24    2.49
 -27   7  -1   52.17    2.95
 -27   7  -1   57.01    3.13
  27   7   1   58.83    2.71
  29  -7   1    1.64    1.05
 -29  -7  -1   -0.12    1.11
 -29  -7  -1    0.09    0.88
  29  -7   1    1.71    1.05
  29  -7   1    0.82    0.72
 -29   7  -1    2.39    1.25
 -29   7  -1    2.03    0.86
  29   7   1    2.85    0.97
 -29   7  -1    1.63    1.16
 -29   7  -1    0.64    1.27
  31  -7   1   73.56    3.79
 -31  -7  -1   80.56    3.19
  31  -7   1   75.09    3.61
 -31  -7  -1   68.91    3.51
  31  -7   1   74.04    3.18
  31   7   1   70.50    3.29
 -31   7  -1   79.54    3.85
 -31   7  -1   75.68    4.16
 -31   7  -1   71.55    3.69
 -31   7  -1   71.85    3.21
  33  -7   1    6.03    1.38
 -33  -7  -1    8.33    1.33
 -33  -7  -1    7.38    1.60
  33  -7   1    8.67    1.42
  33  -7   1    6.01    1.59
 -33   7  -1    4.92    1.46
 -33   7  -1    6.08    1.88
  33   7   1    7.18    1.43
 -33   7  -1    5.90    1.67
  35  -7   1   24.03    2.53
  35  -7   1   30.30    2.68
  35  -7   1   28.78    2.15
 -35  -7  -1   28.81    2.56
 -35   7  -1   25.00    2.71
 -35   7  -1   22.07    2.49
  35   7   1   19.01    2.09
 -35   7  -1   20.46    2.59
 -37  -7  -1   23.28    2.42
  37  -7   1   28.26    2.61
  37  -7   1   28.39    2.88
  37  -7   1   22.79    2.24
 -37   7  -1   25.28    2.78
 -37   7  -1   22.61    2.86
 -37   7  -1   22.87    2.56
  37   7   1   23.94    2.37
  39  -7   1    6.07    1.46
  39  -7   1    3.97    1.34
  39  -7   1    6.91    1.69
 -39  -7  -1    6.00    1.53
 -39   7  -1    2.31    1.62
  39   7   1    6.63    1.49
 -39   7  -1    6.46    1.96
 -39   7  -1    6.44    1.85
 -41  -7  -1   32.73    2.56
  41  -7   1   41.10    2.80
  41  -7   1   39.02    3.44
  41  -7   1   35.04    2.72
  41   7   1   33.90    2.92
 -41   7  -1   29.24    3.07
 -41   7  -1   28.01    3.02
 -41   7  -1   22.77    2.88
  43  -7   1    1.23    1.19
 -43  -7  -1    2.31    1.72
  43  -7   1    0.66    1.16
  43  -7   1    1.36    1.35
 -43   7  -1    2.69    1.91
 -43   7  -1    1.39    1.51
  43   7   1    2.75    1.36
 -43   7  -1    1.95    1.59
  45  -7   1   40.09    3.20
  45  -7   1   33.59    2.65
  45  -7   1   32.91    3.07
 -45   7  -1   33.02    3.55
  45   7   1   33.14    3.03
 -45   7  -1   26.56    3.09
 -45   7  -1   26.29    3.17
  47  -7   1    0.44    1.13
  47  -7   1    0.30    1.30
 -47   7  -1   -0.46    1.44
 -47   7  -1    1.60    1.69
  47   7   1    0.68    1.23
 -47   7  -1    2.59    1.77
  49  -7   1   15.63    2.18
  49  -7   1   18.33    2.61
 -49   7  -1   20.75    3.06
  49   7   1   20.29    2.54
 -49   7  -1   19.31    3.16
 -49   7  -1   22.14    2.85
  51  -7   1    3.78    1.53
  51  -7   1    3.70    1.66
 -51   7  -1    4.49    2.36
  51   7   1    2.86    1.55
 -51   7  -1    7.42    2.15
 -51   7  -1    6.06    2.04
  48  -8  -1   17.67    2.62
 -48   8   1   18.61    3.03
 -48   8   1   14.89    2.67
  48   8  -1   16.84    2.47
 -48   8   1   12.63    2.79
  46  -8  -1    1.76    1.54
  46   8  -1   -0.51    1.26
 -46   8   1    2.42    1.98
 -46   8   1    0.85    1.82
 -46   8   1    1.83    1.73
  44  -8  -1   15.81    2.42
 -44  -8   1   17.80    2.38
 -44   8   1   22.26    3.16
 -44   8   1   22.73    3.23
  44   8  -1   21.40    2.51
 -44   8   1   15.00    2.62
  42  -8  -1   11.52    1.88
 -42  -8   1   11.74    2.12
  42  -8  -1   14.96    2.41
 -42   8   1   14.67    2.52
  42   8  -1   10.96    2.05
 -42   8   1   11.96    2.65
 -42   8   1   14.67    2.60
  40  -8  -1   11.65    1.91
 -40  -8   1   12.71    2.12
  40  -8  -1    9.72    2.02
 -40   8   1   12.70    2.47
 -40   8   1   13.35    2.52
 -40   8   1   16.28    2.67
  40   8  -1   11.81    1.95
 -38  -8   1   43.93    3.21
  38  -8  -1   39.42    3.20
  38  -8  -1   45.43    2.95
 -38   8   1   44.27    3.52
 -38   8   1   50.86    3.82
 -38   8   1   41.78    3.30
  38   8  -1   47.75    3.13
  36  -8  -1    4.05    1.78
  36  -8  -1    5.72    1.50
 -36  -8   1    5.57    1.67
  36  -8  -1    2.18    1.35
 -36   8   1    6.64    1.90
 -36   8   1    7.02    2.03
 -36   8   1    4.45    1.83
  36   8  -1    1.70    1.18
  34  -8  -1   61.30    4.24
 -34  -8   1   59.78    3.51
  34  -8  -1   57.62    3.38
  34  -8  -1   62.93    3.73
 -34   8   1   63.61    3.90
 -34   8   1   68.49    3.22
 -34   8   1   66.23    3.99
  34   8  -1   61.13    3.32
 -34   8   1   66.58    4.21
  32  -8  -1    5.35    1.73
  32  -8  -1    5.79    1.55
 -32  -8   1    5.37    1.63
  32  -8  -1    7.98    1.74
  32   8  -1    4.07    1.24
 -32   8   1    7.55    1.90
 -32   8   1    4.90    1.39
 -32   8   1    6.61    1.89
 -32   8   1    7.00    1.78
 -30  -8   1   51.43    3.31
  30  -8  -1   56.67    3.39
  30  -8  -1   55.15    3.21
 -30   8   1   47.17    3.13
 -30   8   1   45.45    3.52
 -30   8   1   46.76    3.09
 -30   8   1   46.19    2.62
  30   8  -1   44.04    2.57
 -28  -8   1   14.32    1.56
  28  -8  -1    9.80    1.70
 -28  -8   1   14.81    2.16
  28  -8  -1   11.93    1.85
 -28   8   1   13.57    1.99
 -28   8   1   12.91    1.93
 -28   8   1   10.81    2.03
  28   8  -1   16.95    1.81
 -28   8   1   13.03    1.90
 -28   8   1   16.73    1.85
 -26  -8   1   11.11    1.46
  26  -8  -1   17.54    2.06
  26  -8  -1   18.60    2.19
 -26  -8   1   12.98    1.96
 -26   8   1   11.42    1.60
 -26   8   1    8.70    1.84
 -26   8   1   12.65    1.95
 -26   8   1   11.37    1.89
  26   8  -1   12.55    1.53
 -26   8   1   16.01    2.15
 -24  -8   1   43.89    2.98
  24  -8  -1   39.10    2.26
  24  -8  -1   37.73    2.54
 -24  -8   1   37.89    2.25
  24  -8  -1   43.73    2.80
 -24   8   1   37.56    2.67
 -24   8   1   42.60    2.51
 -24   8   1   37.46    2.77
  24   8  -1   45.71    2.35
 -24   8   1   46.85    3.24
 -24   8   1   41.56    2.88
  24   8  -1   40.40    1.98
  22  -8  -1    4.75    1.39
  22  -8  -1    3.18    1.04
  22  -8  -1    5.37    1.19
 -22  -8   1    4.62    1.15
  22  -8  -1    3.92    1.24
 -22  -8   1    6.79    1.68
  22   8  -1    6.43    0.96
 -22   8   1    5.38    1.36
 -22   8   1    7.46    1.35
  22   8  -1    5.29    1.04
 -22   8   1    5.89    1.46
 -22   8   1    5.38    1.55
 -22   8   1    3.84    1.36
 -20  -8   1   51.02    3.16
  20  -8  -1   50.31    2.86
  20  -8  -1   45.97    2.55
  20  -8  -1   52.01    2.50
  20  -8  -1   45.59    2.79
 -20  -8   1   50.32    2.52
 -20   8   1   36.63    2.55
 -20   8   1   38.84    2.39
 -20   8   1   43.89    2.68
  20   8  -1   39.05    2.04
 -20   8   1   34.37    2.77
 -20   8   1   45.71    2.75
  20   8  -1   42.40    2.01
  18  -8  -1    3.06    1.13
 -18  -8   1    2.40    1.30
  18  -8  -1    2.54    1.05
  18  -8  -1    1.30    0.83
  18  -8  -1    1.08    0.83
 -18  -8   1    1.88    0.94
  18   8  -1    1.27    0.66
 -18   8   1    1.83    0.98
 -18   8   1    0.68    1.06
 -18   8   1    1.44    1.24
 -18   8   1    1.67    1.00
  18   8  -1    1.11    0.65
  18   8  -1    1.59    0.93
 -18   8   1    1.83    1.09
  18   8  -1    1.59    0.67
  16  -8  -1   45.49    2.68
 -16  -8   1   52.63    2.61
 -16  -8   1   51.10    3.04
  16  -8  -1   53.77    2.60
  16  -8  -1   52.37    2.80
  16  -8  -1   51.99    2.59
  16   8  -1   38.10    1.91
 -16   8   1   36.87    2.24
 -16   8   1   41.48    2.53
 -16   8   1   36.79    2.34
  16   8  -1   40.58    2.57
 -16   8   1   38.12    2.43
 -16   8   1   33.69    2.63
  16   8  -1   38.55    1.97
  16   8  -1   37.80    1.86
  14  -8  -1   32.25    2.30
  14  -8  -1   30.73    2.09
 -14  -8   1   31.47    2.56
  14  -8  -1   30.45    1.92
  14  -8  -1   30.43    2.16
 -14  -8   1   24.43    1.89
 -14   8   1   28.36    2.14
  14   8  -1   34.42    1.70
  14   8  -1   32.32    2.24
  14   8  -1   29.78    1.78
 -14   8   1   29.79    2.05
 -14   8   1   33.21    2.20
 -14   8   1   28.67    2.39
 -14   8   1   33.08    2.35
  14   8  -1   33.97    1.78
  12  -8  -1   27.52    2.18
 -12  -8   1   30.21    2.04
 -12  -8   1   34.79    2.67
  12  -8  -1   35.09    2.22
  12  -8  -1   29.27    1.88
  12  -8  -1   35.53    2.22
 -12   8   1   27.31    2.19
  12   8  -1   24.60    1.44
  12   8  -1   25.13    2.02
  12   8  -1   27.72    1.74
  12   8  -1   31.01    1.70
 -12   8   1   31.95    2.10
 -12   8   1   26.59    1.99
 -12   8   1   30.95    2.04
 -12   8   1   26.56    2.26
  10  -8  -1   80.82    3.06
  10  -8  -1   76.70    3.41
 -10  -8   1   77.79    3.22
  10  -8  -1   74.17    3.26
  10  -8  -1   77.38    3.33
 -10  -8   1   83.35    3.87
 -10   8   1   83.06    3.52
 -10   8   1   78.64    3.40
  10   8  -1   83.42    3.10
 -10   8   1   80.94    3.29
  10   8  -1   80.85    2.64
  10   8  -1   82.91    2.93
  10   8  -1   82.67    3.59
 -10   8   1   76.87    3.22
 -10   8   1   74.57    3.49
  -8  -8   1    4.36    1.06
  -8  -8   1    2.52    1.14
   8  -8  -1    3.34    1.07
  -8  -8   1    4.02    0.73
   8  -8  -1    4.68    1.17
   8  -8  -1    3.66    0.86
  -8   8   1    7.18    1.13
  -8   8   1    9.31    1.31
   8   8  -1    5.89    1.28
  -8   8   1    8.60    1.40
  -8   8   1    7.62    1.29
   8   8  -1    6.10    1.08
   8   8  -1    4.83    0.92
   8   8  -1    7.42    1.07
  -8   8   1    8.44    1.42
   6  -8  -1  112.07    3.75
   6  -8  -1  103.34    4.05
  -6  -8   1  117.51    3.34
   6  -8  -1  108.68    4.15
  -6  -8   1  117.36    4.59
  -6  -8   1  113.39    4.06
   6   8  -1  107.57    4.16
  -6   8   1  106.52    4.14
  -6   8   1  108.08    4.08
  -6   8   1  108.28    3.79
  -6   8   1  115.34    3.87
   6   8  -1  105.76    3.73
   6   8  -1  112.47    3.63
   6   8  -1  107.81    3.60
   4  -8  -1    3.34    1.04
  -4  -8   1    1.64    0.60
   4  -8  -1    1.68    0.94
   4  -8  -1    1.84    0.77
  -4  -8   1    1.53    0.94
  -4  -8   1    3.27    1.16
   4   8  -1    1.54    0.73
   4   8  -1    2.82    0.84
  -4   8   1    2.44    0.80
   4   8  -1    1.99    0.96
  -4   8   1    2.08    0.89
   4   8  -1    2.44    0.82
  -4   8   1    2.06    0.96
  -4   8   1    3.26    0.91
  -2  -8   1  111.65    3.32
   2  -8  -1  109.74    4.11
   2  -8  -1  112.64    3.65
  -2  -8   1  108.24    4.02
   2  -8  -1  105.42    4.15
  -2  -8   1  109.71    4.30
   2   8  -1  106.29    4.05
  -2   8   1  109.03    3.67
  -2   8   1  112.70    3.96
   2   8  -1  105.48    3.62
  -2   8   1  113.11    4.20
   2   8  -1  101.14    3.60
  -2   8   1  114.40    3.72
   2   8  -1  107.45    3.85
   0  -8   1   28.66    2.00
   0  -8  -1   23.74    2.21
   0  -8  -1   21.74    2.00
   0  -8  -1   24.47    1.60
   0  -8   1   20.89    1.34
   0  -8   1   18.84    2.06
   0   8   1   23.13    1.76
   0   8   1   23.72    1.61
   0   8  -1   23.77    1.68
   0   8   1   21.18    1.55
   0   8  -1   22.50    1.91
   0   8   1   21.92    2.07
   0   8  -1   23.79    1.68
   0   8  -1   24.01    1.84
  -2  -8  -1   59.25    3.00
   2  -8   1   57.00    2.52
  -2  -8  -1   55.85    2.80
   2  -8   1   56.39    2.74
   2  -8   1   52.18    2.89
   2  -8   1   59.51    2.24
  -2  -8  -1   56.39    2.36
   2   8   1   64.62    3.02
   2   8   1   61.93    2.51
   2   8   1   59.96    2.47
   2   8   1   61.99    2.70
  -2   8  -1   60.78    2.92
  -2   8  -1   64.35    2.69
  -2   8  -1   60.71    2.86
  -2   8  -1   59.13    2.62
   4  -8   1   59.54    2.33
   4  -8   1   58.90    2.86
   4  -8   1   58.47    2.95
  -4  -8  -1   58.64    3.11
   4  -8   1   55.68    2.58
  -4  -8  -1   53.80    2.74
  -4  -8  -1   57.84    2.39
  -4   8  -1   48.20    2.56
   4   8   1   46.55    2.54
  -4   8  -1   48.19    2.35
  -4   8  -1   45.49    2.35
   4   8   1   48.41    2.30
  -4   8  -1   50.32    2.63
   4   8   1   43.01    2.04
  -6  -8  -1    3.80    1.14
   6  -8   1    4.07    1.11
   6  -8   1    3.85    0.83
  -6  -8  -1    3.88    0.89
  -6  -8  -1    2.56    1.13
   6  -8   1    5.35    1.27
   6  -8   1    3.87    0.98
  -6   8  -1    5.98    1.20
  -6   8  -1    4.75    1.10
   6   8   1    3.64    1.03
   6   8   1    4.71    0.82
  -6   8  -1    3.16    1.11
  -6   8  -1    4.49    1.04
   6   8   1    3.50    0.89
   8  -8   1   49.21    2.45
   8  -8   1   49.39    2.64
   8  -8   1   51.03    2.21
   8  -8   1   44.79    2.53
  -8  -8  -1   49.02    2.56
  -8  -8  -1   43.87    2.73
  -8  -8  -1   49.61    2.17
  -8   8  -1   41.34    2.54
   8   8   1   41.05    1.88
  -8   8  -1   43.90    2.55
   8   8   1   40.50    2.01
  -8   8  -1   41.24    2.24
  -8   8  -1   41.99    2.27
   8   8   1   41.33    2.41
  10  -8   1    1.84    0.91
 -10  -8  -1    2.55    0.97
 -10  -8  -1    2.23    1.20
  10  -8   1    2.32    0.91
  10  -8   1    2.06    0.93
 -10  -8  -1    1.85    0.76
  10  -8   1    3.33    0.84
  10   8   1    1.55    0.65
 -10   8  -1    1.23    0.84
  10   8   1    2.37    0.99
  10   8   1    1.03    0.62
 -10   8  -1    1.37    0.96
 -10   8  -1    2.79    1.12
 -10   8  -1    0.32    0.80
  12  -8   1   34.27    2.20
 -12  -8  -1   34.24    2.63
  12  -8   1   39.18    2.02
 -12  -8  -1   39.70    2.32
 -12  -8  -1   38.04    1.92
  12  -8   1   38.27    2.28
  12  -8   1   38.63    2.39
 -12   8  -1   30.86    2.13
 -12   8  -1   31.97    2.13
 -12   8  -1   30.87    2.34
  12   8   1   29.26    1.63
 -12   8  -1   27.58    2.18
  12   8   1   35.10    1.64
  12   8   1   34.05    2.31
  14  -8   1   25.62    1.87
  14  -8   1   27.24    2.47
 -14  -8  -1   22.89    1.56
 -14  -8  -1   25.04    2.14
  14  -8   1   19.10    1.89
  14  -8   1   22.87    1.67
 -14  -8  -1   27.35    2.62
 -14   8  -1   19.44    2.06
  14   8   1   23.52    2.23
 -14   8  -1   20.54    1.96
 -14   8  -1   21.80    1.92
  14   8   1   22.14    1.33
  14   8   1   24.27    2.09
 -14   8  -1   26.39    2.14
 -14   8  -1   23.68    1.86
  14   8   1   24.06    1.42
  16  -8   1   30.94    2.25
 -16  -8  -1   33.43    1.80
  16  -8   1   31.31    2.02
 -16  -8  -1   30.82    2.13
 -16  -8  -1   33.50    2.60
  16  -8   1   27.58    1.87
  16  -8   1   31.14    2.20
  16   8   1   32.05    1.65
  16   8   1   34.19    2.40
  16   8   1   29.00    1.52
 -16   8  -1   29.64    2.17
  16   8   1   27.71    1.50
 -16   8  -1   30.72    2.21
 -16   8  -1   32.48    2.05
 -16   8  -1   31.65    2.25
 -16   8  -1   29.40    2.38
 -18  -8  -1   48.59    2.96
  18  -8   1   51.72    2.54
 -18  -8  -1   49.06    2.63
 -18  -8  -1   52.37    2.29
  18  -8   1   51.50    2.94
  18  -8   1   55.14    2.91
  18   8   1   49.31    2.84
 -18   8  -1   47.75    2.78
 -18   8  -1   49.72    2.54
 -18   8  -1   51.99    2.83
  18   8   1   49.20    2.15
 -18   8  -1   47.05    2.99
 -18   8  -1   51.49    2.79
  18   8   1   48.37    1.94
  18   8   1   46.89    1.91
 -20  -8  -1   15.54    2.02
  20  -8   1   15.10    1.94
  20  -8   1   15.65    1.96
 -20  -8  -1   14.51    1.39
  20  -8   1   14.79    1.58
 -20  -8  -1   15.80    1.69
  20   8   1    9.82    1.61
 -20   8  -1   10.40    1.59
  20   8   1   11.78    1.25
 -20   8  -1    6.74    1.57
 -20   8  -1   10.32    1.62
  20   8   1   11.74    0.97
 -20   8  -1    9.31    1.72
 -20   8  -1   12.16    1.52
  20   8   1   10.69    0.99
 -22  -8  -1  100.19    3.77
 -22  -8  -1   90.77    3.31
  22  -8   1   95.87    4.11
 -22  -8  -1   94.90    4.27
  22  -8   1   93.45    4.07
  22  -8   1   93.81    3.48
 -22   8  -1   96.32    4.46
  22   8   1   96.75    3.50
 -22   8  -1  105.94    4.23
 -22   8  -1  103.59    3.80
 -22   8  -1  101.82    4.31
 -22   8  -1   97.70    4.18
  24  -8   1    0.99    1.01
  24  -8   1    0.98    1.13
 -24  -8  -1    1.72    0.97
 -24  -8  -1    1.67    1.36
 -24  -8  -1    2.20    0.85
  24   8   1    1.35    0.76
 -24   8  -1    2.07    1.21
 -24   8  -1    1.24    1.22
 -24   8  -1    1.58    0.98
 -24   8  -1    2.35    1.07
 -24   8  -1    3.56    1.40
 -26  -8  -1   74.11    3.75
  26  -8   1   76.12    3.81
  26  -8   1   81.71    3.92
 -26  -8  -1   83.25    3.42
 -26   8  -1   82.50    3.99
 -26   8  -1   79.96    4.25
 -26   8  -1   83.77    3.40
  26   8   1   87.79    3.39
 -26   8  -1   81.85    3.88
 -26   8  -1   84.73    4.00
  28  -8   1   22.42    2.36
 -28  -8  -1   29.97    2.79
 -28  -8  -1   27.12    2.11
  28  -8   1   28.90    2.77
 -28   8  -1   19.48    2.26
 -28   8  -1   20.02    1.84
 -28   8  -1   22.97    2.54
  28   8   1   19.25    1.87
 -28   8  -1   19.55    2.57
  30  -8   1   41.66    2.91
 -30  -8  -1   43.40    2.89
 -30  -8  -1   45.52    2.61
  30  -8   1   40.88    2.96
 -30   8  -1   38.25    2.96
 -30   8  -1   40.79    3.28
  30   8   1   39.10    2.40
 -30   8  -1   38.37    2.79
 -32  -8  -1   37.01    2.86
 -32  -8  -1   40.63    2.43
  32  -8   1   37.20    2.79
  32  -8   1   39.92    3.02
 -32   8  -1   32.79    3.37
 -32   8  -1   35.32    2.93
 -32   8  -1   37.99    2.95
  32   8   1   32.82    2.33
  34  -8   1    8.03    1.70
  34  -8   1    7.52    1.81
 -34  -8  -1   11.09    2.01
 -34   8  -1    3.19    1.56
 -34   8  -1   12.27    2.25
  34   8   1    7.82    1.50
 -34   8  -1    6.31    1.88
 -36  -8  -1   37.07    2.98
  36  -8   1   31.84    2.96
  36  -8   1   29.82    3.10
 -36   8  -1   32.04    3.10
  36   8   1   37.47    2.65
 -36   8  -1   37.56    3.76
 -36   8  -1   30.62    3.12
 -38  -8  -1    0.03    1.27
  38  -8   1    1.44    1.38
  38  -8   1   -0.04    1.05
 -38   8  -1    0.92    1.45
 -38   8  -1    2.41    1.60
  38   8   1    0.03    1.12
 -38   8  -1    1.50    1.65
  40  -8   1   27.28    2.78
  40  -8   1   24.37    2.80
 -40  -8  -1   23.88    2.65
 -40   8  -1   24.91    3.10
 -40   8  -1   27.43    3.08
 -40   8  -1   25.84    3.05
  40   8   1   25.13    2.58
 -42  -8  -1    6.19    1.85
  42  -8   1    6.43    1.58
  42  -8   1    2.62    1.54
 -42   8  -1    2.75    1.92
 -42   8  -1    7.35    2.12
 -42   8  -1    7.62    2.33
  42   8   1    6.98    1.55
  44  -8   1    8.52    2.10
  44  -8   1    7.94    1.66
 -44   8  -1    8.25    2.24
  44   8   1    3.86    1.48
 -44   8  -1    4.91    2.02
 -44   8  -1    3.60    2.00
  46  -8   1   10.95    2.25
  46   8   1   16.72    2.37
 -46   8  -1   15.14    2.81
 -46   8  -1   16.59    2.90
 -46   8  -1   12.88    2.48
  48  -8   1    2.52    1.55
 -48   8  -1    4.74    2.15
 -48   8  -1    4.32    2.18
  48   8   1   -0.89    1.09
 -48   8  -1    2.07    1.84
  45  -9  -1    1.26    1.50
  45   9  -1    6.97    1.84
 -45   9   1    6.43    2.28
 -45   9   1    2.24    2.00
 -45   9   1    1.65    1.99
  43  -9  -1   21.32    2.98
 -43  -9   1   17.77    2.47
 -43   9   1   18.87    2.98
 -43   9   1   18.57    2.91
  43   9  -1   16.21    2.33
 -43   9   1   17.86    2.97
  41  -9  -1    0.64    1.20
 -41  -9   1    0.46    1.45
  41  -9  -1   -0.85    1.30
  41   9  -1   -0.35    1.22
 -41   9   1    2.79    1.89
 -41   9   1    0.24    1.69
 -41   9   1    0.14    1.66
  39  -9  -1   21.61    2.89
 -39  -9   1   19.57    2.63
  39  -9  -1   21.08    2.52
 -39   9   1   21.85    2.91
  39   9  -1   23.09    2.52
 -39   9   1   21.53    3.08
 -39   9   1   20.78    2.92
  37  -9  -1   13.46    2.35
 -37  -9   1   12.22    2.19
  37  -9  -1   13.70    2.17
 -37   9   1   13.02    2.50
  37   9  -1   12.96    2.01
 -37   9   1    9.85    2.34
 -37   9   1    8.79    2.15
 -35  -9   1   41.68    3.21
  35  -9  -1   37.14    2.94
  35  -9  -1   34.99    3.48
 -35   9   1   23.21    3.00
 -35   9   1   32.70    3.48
 -35   9   1   34.19    3.36
  35   9  -1   36.20    2.67
 -33  -9   1   18.51    2.55
  33  -9  -1   25.73    2.78
  33  -9  -1   18.06    2.41
 -33   9   1   22.23    2.88
  33   9  -1   22.27    2.30
 -33   9   1   21.80    2.72
 -33   9   1   25.01    2.83
 -33   9   1   23.35    3.03
 -31  -9   1   14.28    2.32
  31  -9  -1    9.77    1.78
  31  -9  -1   13.86    2.14
  31  -9  -1   13.17    2.27
 -31   9   1   15.92    1.94
 -31   9   1   15.20    2.37
  31   9  -1   13.51    1.74
 -31   9   1   11.77    2.12
 -31   9   1   12.22    2.36
  29  -9  -1   28.79    2.85
  29  -9  -1   27.21    2.76
 -29  -9   1   25.51    2.75
  29  -9  -1   28.47    2.67
  29   9  -1   25.75    2.25
 -29   9   1   35.44    2.97
 -29   9   1   28.12    3.07
 -29   9   1   30.48    2.40
 -29   9   1   31.16    3.04
  27  -9  -1    5.30    1.49
  27  -9  -1    1.97    1.27
 -27  -9   1    3.14    1.64
  27  -9  -1    1.60    1.17
 -27  -9   1    2.70    1.12
  27   9  -1    3.97    1.07
 -27   9   1    0.89    1.23
 -27   9   1    1.28    1.09
 -27   9   1    1.62    1.24
 -27   9   1    5.60    1.74
 -27   9   1    1.32    1.44
  25  -9  -1   34.25    2.76
 -25  -9   1   35.60    2.33
 -25  -9   1   37.58    3.10
  25  -9  -1   39.67    2.59
  25  -9  -1   39.79    2.94
  25   9  -1   37.75    2.34
 -25   9   1   45.05    3.40
  25   9  -1   41.49    2.10
 -25   9   1   38.87    2.99
  25   9  -1   42.16    2.18
 -25   9   1   41.87    3.08
 -25   9   1   39.76    2.64
  25   9  -1   35.52    2.89
 -25   9   1   39.20    2.96
 -23  -9   1    5.97    1.31
  23  -9  -1    6.71    1.51
 -23  -9   1    6.42    1.75
  23  -9  -1    7.41    1.44
  23  -9  -1    9.54    1.75
 -23   9   1    9.44    1.92
 -23   9   1    7.23    1.70
  23   9  -1    7.61    1.15
 -23   9   1    8.68    1.62
 -23   9   1    6.51    1.52
 -23   9   1    7.82    1.80
  23   9  -1    6.09    1.62
  23   9  -1    8.79    1.20
  21  -9  -1   41.20    2.47
  21  -9  -1   35.15    2.47
 -21  -9   1   41.27    2.46
  21  -9  -1   35.97    2.72
  21  -9  -1   41.63    2.88
 -21  -9   1   36.70    3.03
  21   9  -1   41.44    2.92
 -21   9   1   42.17    2.70
 -21   9   1   43.42    3.00
  21   9  -1   43.26    2.18
  21   9  -1   39.63    2.14
 -21   9   1   39.65    2.87
 -21   9   1   41.25    2.87
 -21   9   1   40.69    3.16
  19  -9  -1   18.53    1.96
 -19  -9   1   15.95    2.36
  19  -9  -1   18.48    2.20
  19  -9  -1   15.87    1.84
 -19  -9   1   17.06    1.87
  19  -9  -1   17.86    2.25
 -19   9   1   17.52    2.08
  19   9  -1   14.77    1.45
  19   9  -1   16.78    1.61
  19   9  -1   14.46    2.10
 -19   9   1   20.05    2.53
 -19   9   1   15.03    2.05
 -19   9   1   16.67    2.03
 -19   9   1   14.95    1.93
  17  -9  -1   10.23    1.56
  17  -9  -1    9.84    1.71
  17  -9  -1   10.38    1.49
 -17  -9   1    8.56    1.47
  17  -9  -1   10.83    1.85
 -17  -9   1    8.62    1.86
 -17   9   1    6.31    1.68
  17   9  -1    9.55    1.28
 -17   9   1    6.05    1.44
  17   9  -1    9.33    1.21
  17   9  -1    7.65    1.71
 -17   9   1    8.22    1.56
 -17   9   1    8.35    1.63
 -17   9   1    8.86    1.59
  15  -9  -1   49.43    2.64
  15  -9  -1   53.75    3.07
 -15  -9   1   49.36    2.74
  15  -9  -1   53.28    2.83
  15  -9  -1   47.55    2.89
 -15  -9   1   50.64    3.36
 -15   9   1   53.98    2.97
  15   9  -1   49.21    2.45
  15   9  -1   52.89    3.10
 -15   9   1   48.75    2.81
 -15   9   1   47.15    2.75
  15   9  -1   49.57    2.33
 -15   9   1   49.17    2.94
 -15   9   1   49.91    3.26
  13  -9  -1    0.94    0.99
  13  -9  -1    3.25    0.97
 -13  -9   1    0.91    0.93
  13  -9  -1    2.30    1.19
 -13  -9   1    0.81    1.33
  13   9  -1    0.62    0.68
 -13   9   1    2.80    1.18
  13   9  -1    2.19    0.85
 -13   9   1    0.20    0.93
 -13   9   1    0.59    0.95
 -13   9   1    2.90    1.20
  13   9  -1    0.14    0.92
 -13   9   1    0.67    1.10
 -11  -9   1   69.68    3.84
  11  -9  -1   75.48    3.49
  11  -9  -1   69.44    3.48
  11  -9  -1   65.96    2.97
 -11  -9   1   69.91    3.24
 -11   9   1   71.97    3.33
 -11   9   1   70.01    3.63
  11   9  -1   73.36    3.03
  11   9  -1   68.65    2.85
 -11   9   1   74.49    3.47
 -11   9   1   70.76    3.31
  11   9  -1   71.50    3.47
 -11   9   1   75.65    3.64
  -9  -9   1    8.94    1.46
  -9  -9   1   13.12    2.07
   9  -9  -1    9.34    1.64
   9  -9  -1   11.14    1.42
   9  -9  -1    6.24    1.35
  -9   9   1    7.81    1.45
   9   9  -1    9.26    1.37
   9   9  -1   10.14    1.65
  -9   9   1    6.41    1.44
  -9   9   1    7.85    1.40
  -9   9   1    7.12    1.54
  -9   9   1    7.18    1.28
   9   9  -1    9.37    1.24
  -7  -9   1   43.25    2.56
   7  -9  -1   41.55    2.25
  -7  -9   1   41.76    2.83
   7  -9  -1   40.36    2.67
   7  -9  -1   37.70    2.59
  -7   9   1   38.87    2.32
  -7   9   1   41.52    2.70
  -7   9   1   38.04    2.30
   7   9  -1   34.47    2.51
  -7   9   1   37.56    2.59
   7   9  -1   36.50    2.23
   7   9  -1   39.06    2.14
  -7   9   1   32.74    2.33
   5  -9  -1   37.13    2.58
   5  -9  -1   37.81    2.55
   5  -9  -1   37.22    2.09
  -5  -9   1   32.61    2.68
  -5  -9   1   34.24    2.38
  -5   9   1   31.65    2.39
  -5   9   1   30.29    2.32
   5   9  -1   30.80    1.97
  -5   9   1   31.20    2.08
  -5   9   1   35.64    2.19
  -5   9   1   34.36    2.49
   5   9  -1   28.65    2.06
   5   9  -1   31.83    2.40
  -3  -9   1   21.31    2.44
   3  -9  -1   20.85    2.24
   3  -9  -1   19.90    1.70
  -3  -9   1   19.10    1.98
   3  -9  -1   17.81    1.99
   3   9  -1   11.98    1.68
  -3   9   1   16.26    1.69
  -3   9   1   13.93    1.72
   3   9  -1   11.61    1.43
  -3   9   1   13.20    1.53
   3   9  -1   14.39    1.68
  -3   9   1   16.44    2.00
   3   9  -1   14.49    1.60
   1  -9  -1   70.19    3.31
  -1  -9   1   68.18    3.31
   1  -9  -1   68.68    3.54
  -1  -9   1   71.69    3.65
   1  -9  -1   71.84    2.87
  -1   9   1   62.23    3.06
   1   9  -1   60.78    3.21
   1   9  -1   69.28    2.92
   1   9  -1   61.74    2.82
  -1   9   1   60.95    3.25
   1   9  -1   65.38    3.09
  -1   9   1   61.34    2.80
  -1  -9  -1   10.50    1.27
  -1  -9  -1    8.70    1.47
   1  -9   1    8.54    1.52
  -1  -9  -1    9.95    1.68
   1  -9   1    9.49    1.63
  -1   9  -1    7.53    1.45
   1   9   1    7.32    1.17
   1   9   1    9.97    1.66
  -1   9  -1    7.36    1.26
   1   9   1    7.22    1.32
  -1   9  -1    7.72    1.29
  -1   9  -1    8.80    1.49
   3  -9   1   62.15    2.44
  -3  -9  -1   56.11    2.48
   3  -9   1   56.39    3.06
  -3  -9  -1   60.27    3.27
   3  -9   1   61.33    3.26
  -3  -9  -1   56.50    2.95
   3   9   1   58.37    2.58
   3   9   1   61.11    3.15
  -3   9  -1   54.86    2.75
   3   9   1   53.93    2.71
  -3   9  -1   53.56    2.69
  -3   9  -1   55.03    2.98
  -3   9  -1   57.49    3.04
   5  -9   1    2.76    0.76
  -5  -9  -1    1.11    1.04
  -5  -9  -1    3.74    0.91
  -5  -9  -1    4.86    1.42
   5  -9   1    3.33    1.18
   5  -9   1    2.04    1.17
   5   9   1    4.43    1.04
  -5   9  -1    3.95    1.22
   5   9   1    3.43    0.91
  -5   9  -1    4.88    1.14
  -5   9  -1    3.62    1.15
   5   9   1    3.49    1.17
  -5   9  -1    6.64    1.26
   7  -9   1   26.97    1.73
   7  -9   1   27.76    2.09
   7  -9   1   27.41    2.17
  -7  -9  -1   28.22    2.13
  -7  -9  -1   28.77    1.76
  -7  -9  -1   24.39    2.53
   7  -9   1   28.52    2.54
  -7   9  -1   29.89    2.16
  -7   9  -1   31.91    2.42
  -7   9  -1   29.56    2.35
   7   9   1   29.28    2.35
   7   9   1   29.54    1.78
   7   9   1   29.93    1.95
  -7   9  -1   27.61    2.06
  -9  -9  -1   22.80    2.64
  -9  -9  -1   26.88    2.36
   9  -9   1   23.14    1.66
   9  -9   1   22.36    2.06
   9  -9   1   26.59    2.42
   9  -9   1   25.62    2.37
  -9  -9  -1   21.84    1.61
   9   9   1   29.27    1.86
  -9   9  -1   27.60    2.12
   9   9   1   29.76    2.36
  -9   9  -1   28.60    2.43
   9   9   1   26.47    1.68
  -9   9  -1   26.85    2.12
  -9   9  -1   27.18    2.30
 -11  -9  -1   10.27    1.23
  11  -9   1    5.40    1.32
  11  -9   1    7.98    1.41
  11  -9   1    8.07    1.56
 -11  -9  -1   11.03    1.95
  11  -9   1   10.03    1.30
 -11  -9  -1    6.98    1.41
 -11   9  -1   10.59    1.53
  11   9   1   11.26    1.35
 -11   9  -1   10.32    1.60
 -11   9  -1   11.37    1.73
 -11   9  -1   12.72    1.76
  11   9   1   12.73    1.29
  11   9   1    7.80    1.53
 -13  -9  -1   85.83    3.69
 -13  -9  -1   77.01    4.00
 -13  -9  -1   89.93    3.36
  13  -9   1   76.95    3.54
  13  -9   1   85.12    3.91
  13  -9   1   84.56    3.26
  13  -9   1   85.74    3.67
  13   9   1   82.64    3.82
 -13   9  -1   84.30    3.59
 -13   9  -1   78.42    3.59
 -13   9  -1   80.24    3.62
 -13   9  -1   85.56    4.00
  13   9   1   76.37    2.88
 -13   9  -1   81.71    3.83
  13   9   1   80.46    3.02
  15  -9   1    5.40    1.30
  15  -9   1    4.15    1.04
 -15  -9  -1    8.09    1.50
  15  -9   1    5.01    1.32
  15  -9   1    5.46    1.41
 -15  -9  -1    5.80    1.71
 -15   9  -1    5.27    1.36
 -15   9  -1    3.08    1.25
 -15   9  -1    4.94    1.29
 -15   9  -1    4.94    1.60
  15   9   1    6.39    1.56
  15   9   1    6.48    0.95
  15   9   1    5.27    0.94
 -15   9  -1    6.09    1.55
  17  -9   1   58.08    2.99
  17  -9   1   63.63    2.88
 -17  -9  -1   59.18    3.10
  17  -9   1   63.00    3.28
  17  -9   1   64.20    3.49
 -17  -9  -1   60.88    3.66
  17   9   1   59.79    2.41
 -17   9  -1   60.25    3.23
 -17   9  -1   56.87    3.27
  17   9   1   62.67    3.39
 -17   9  -1   60.18    3.03
 -17   9  -1   56.26    3.49
 -17   9  -1   62.64    3.23
  17   9   1   59.10    2.39
  19  -9   1    7.14    1.37
  19  -9   1   11.43    1.93
  19  -9   1    6.42    1.41
  19  -9   1    6.21    1.24
 -19  -9  -1    5.40    1.36
 -19  -9  -1    6.62    1.66
 -19   9  -1    6.99    1.38
 -19   9  -1    5.45    1.42
 -19   9  -1    8.08    1.70
  19   9   1    7.55    1.02
 -19   9  -1    7.50    1.66
  19   9   1    8.05    1.69
 -19   9  -1    7.43    1.50
 -21  -9  -1   51.03    2.90
  21  -9   1   42.55    2.51
  21  -9   1   54.43    3.15
  21  -9   1   44.70    3.07
  21  -9   1   47.57    2.75
 -21  -9  -1   46.80    3.29
 -21   9  -1   46.16    3.09
 -21   9  -1   52.61    3.12
 -21   9  -1   45.82    2.69
  21   9   1   48.56    2.11
  21   9   1   52.90    3.21
 -21   9  -1   51.26    3.45
 -21   9  -1   47.87    3.09
 -23  -9  -1   37.75    3.01
  23  -9   1   28.72    2.69
  23  -9   1   35.38    2.71
 -23  -9  -1   37.24    2.48
  23  -9   1   32.93    2.34
  23   9   1   31.75    2.64
 -23   9  -1   31.67    2.89
  23   9   1   31.15    1.70
 -23   9  -1   33.16    2.74
 -23   9  -1   30.08    2.69
 -23   9  -1   30.64    2.26
 -23   9  -1   35.32    3.01
  25  -9   1   18.72    2.38
  25  -9   1   18.00    2.28
 -25  -9  -1   15.99    2.39
 -25  -9  -1   15.54    1.91
 -25   9  -1   16.02    2.19
  25   9   1   14.60    1.30
 -25   9  -1   13.35    1.74
  25   9   1   16.52    2.29
 -25   9  -1   13.72    2.39
 -25   9  -1   18.79    2.39
 -25   9  -1   16.66    2.13
 -27  -9  -1   48.69    2.82
  27  -9   1   48.14    3.25
 -27  -9  -1   56.31    3.56
  27  -9   1   48.14    3.31
 -27   9  -1   44.77    3.48
  27   9   1   42.25    1.98
 -27   9  -1   41.91    2.98
  27   9   1   47.31    3.19
 -27   9  -1   44.16    3.15
 -27   9  -1   45.02    2.66
 -29  -9  -1    2.56    1.44
  29  -9   1    2.09    1.29
 -29  -9  -1    2.09    1.16
  29  -9   1    2.06    1.45
 -29   9  -1    1.40    1.48
 -29   9  -1   -1.12    1.13
  29   9   1    2.06    0.71
  29   9   1    1.02    1.29
 -29   9  -1    1.87    1.55
  31  -9   1   37.74    3.46
 -31  -9  -1   39.68    3.17
 -31  -9  -1   36.04    2.90
  31  -9   1   40.76    3.08
 -31   9  -1   31.75    3.04
 -31   9  -1   27.96    3.04
 -31   9  -1   37.78    3.06
  33  -9   1    8.76    1.86
  33  -9   1    7.27    1.77
 -33  -9  -1    6.73    1.82
 -33   9  -1    6.29    1.89
 -33   9  -1    7.54    1.98
 -33   9  -1    5.90    1.95
  35  -9   1   24.61    2.74
 -35  -9  -1   28.55    2.96
  35  -9   1   23.36    2.84
 -35   9  -1   23.07    3.18
  35   9   1   22.39    2.38
 -35   9  -1   19.31    2.75
 -35   9  -1   19.88    2.70
  37  -9   1   18.36    2.63
 -37  -9  -1   19.94    2.45
  37  -9   1   19.63    2.44
 -37   9  -1   22.73    3.22
 -37   9  -1   29.84    3.19
  37   9   1   19.76    2.37
 -37   9  -1   24.24    2.97
 -39  -9  -1    9.03    2.13
  39  -9   1    7.69    1.78
  39  -9   1    3.11    1.57
 -39   9  -1    6.71    2.12
 -39   9  -1   10.56    2.27
 -39   9  -1   10.39    2.28
  39   9   1    8.98    1.78
  41  -9   1   16.59    2.64
 -41  -9  -1   12.54    2.22
  41  -9   1   14.37    2.26
 -41   9  -1   15.86    2.70
 -41   9  -1   12.56    2.64
 -41   9  -1   16.29    2.79
  41   9   1   13.72    2.16
  43  -9   1    1.31    1.50
 -43  -9  -1    1.22    1.61
  43  -9   1   -0.65    1.16
 -43   9  -1    3.87    1.92
  43   9   1   -1.20    1.12
 -43   9  -1    2.90    1.91
 -43   9  -1    0.20    1.78
  38 -10  -1   19.95    2.99
  38 -10  -1   15.35    2.36
  38 -10  -1   18.17    2.60
 -38 -10   1   15.88    2.61
 -38  10   1   13.80    2.67
 -38  10   1   14.32    2.74
 -38  10   1    6.65    2.24
  36 -10  -1    4.92    1.62
  36 -10  -1    2.16    1.55
  36 -10  -1    4.63    1.74
 -36 -10   1    6.26    2.05
 -36  10   1   -1.17    1.58
  36  10  -1    2.93    1.80
 -36  10   1    0.99    1.60
 -36  10   1    3.26    1.85
  34 -10  -1   18.70    2.49
  34 -10  -1   17.70    2.49
  34 -10  -1   14.53    2.41
 -34 -10   1   17.55    2.61
  34  10  -1   24.75    3.11
 -34  10   1   18.94    2.81
 -34  10   1   19.90    2.84
  34  10  -1   17.80    1.79
 -34  10   1   15.53    2.66
  32 -10  -1    2.20    1.27
  32 -10  -1    3.17    1.48
 -32 -10   1    3.51    1.76
  32 -10  -1    2.45    1.55
 -32  10   1    0.12    1.46
  32  10  -1    1.72    1.53
 -32  10   1    3.02    1.67
  32  10  -1    2.15    0.97
 -32  10   1    3.42    1.83
  30 -10  -1   22.03    2.77
  30 -10  -1   19.10    2.62
 -30 -10   1   22.57    2.96
  30 -10  -1   21.55    2.48
  30  10  -1   20.98    1.89
 -30  10   1   22.97    3.08
 -30  10   1   17.99    2.20
 -30  10   1   27.63    3.08
 -30  10   1   22.95    2.97
  30  10  -1   25.02    2.93
  28 -10  -1    6.93    1.55
 -28 -10   1   12.98    2.32
  28 -10  -1   10.49    2.06
  28 -10  -1    8.05    1.90
  28  10  -1    6.13    1.89
 -28  10   1    7.41    2.04
 -28  10   1    7.12    2.00
 -28  10   1    6.31    1.81
  28  10  -1    9.00    1.30
 -28  10   1    8.72    1.74
 -26 -10   1   11.33    2.16
  26 -10  -1   13.04    2.19
  26 -10  -1   19.10    2.50
  26 -10  -1   16.15    2.01
 -26  10   1   18.01    2.49
 -26  10   1   17.57    2.19
  26  10  -1   18.80    1.78
 -26  10   1   14.38    2.54
 -26  10   1   16.56    2.56
  26  10  -1   13.81    2.40
 -26  10   1   22.21    2.73
  24 -10  -1   24.76    2.80
 -24 -10   1   23.85    2.28
 -24 -10   1   25.37    2.92
  24 -10  -1   25.56    2.79
  24 -10  -1   24.91    2.43
 -24  10   1   24.04    2.92
 -24  10   1   23.18    2.42
 -24  10   1   21.89    2.61
 -24  10   1   27.99    2.93
 -24  10   1   28.33    2.96
  24  10  -1   23.18    2.68
  24  10  -1   29.25    1.99
  22 -10  -1    5.40    1.39
 -22 -10   1    6.00    1.80
  22 -10  -1    7.00    1.64
 -22 -10   1    5.86    1.53
  22 -10  -1    2.83    1.46
 -22  10   1    5.39    1.56
  22  10  -1    5.62    1.17
  22  10  -1    7.39    1.93
 -22  10   1    4.86    1.51
 -22  10   1    6.23    1.77
 -22  10   1    6.49    1.80
 -22  10   1    7.01    1.91
 -20 -10   1   40.76    2.69
  20 -10  -1   39.57    2.64
  20 -10  -1   38.53    2.55
  20 -10  -1   41.86    3.55
 -20 -10   1   40.63    3.34
 -20  10   1   42.01    3.34
 -20  10   1   42.24    3.03
  20  10  -1   37.39    2.21
  20  10  -1   36.18    2.99
  20  10  -1   36.37    2.21
 -20  10   1   44.56    2.94
 -20  10   1   41.57    3.05
 -20  10   1   32.42    3.16
 -18 -10   1    1.17    1.10
  18 -10  -1   -0.10    0.97
 -18 -10   1    0.66    1.45
  18 -10  -1    0.42    1.07
  18 -10  -1    0.40    1.17
  18  10  -1    0.65    0.82
  18  10  -1    2.46    0.93
 -18  10   1    1.50    1.27
 -18  10   1    2.49    1.32
  18  10  -1    2.50    1.45
 -18  10   1    2.31    1.43
 -18  10   1    0.22    1.18
 -18  10   1    1.44    1.40
 -16 -10   1   30.61    3.20
  16 -10  -1   40.23    2.50
  16 -10  -1   36.12    3.23
 -16 -10   1   37.88    2.67
  16 -10  -1   37.87    2.64
 -16  10   1   40.21    3.01
  16  10  -1   34.61    2.24
 -16  10   1   36.32    2.73
 -16  10   1   31.83    2.65
 -16  10   1   34.54    2.73
 -16  10   1   34.24    3.20
  16  10  -1   41.72    3.01
  16  10  -1   38.22    2.22
  14 -10  -1   12.13    1.63
  14 -10  -1    8.82    1.66
 -14 -10   1    9.29    2.02
 -14 -10   1   12.32    1.83
  14 -10  -1    8.49    1.76
 -14  10   1    7.56    1.64
 -14  10   1    8.25    1.64
 -14  10   1   10.41    1.85
  14  10  -1   12.22    1.89
  14  10  -1    9.99    1.40
 -14  10   1    7.58    1.87
  14  10  -1    9.66    1.44
 -14  10   1   10.66    1.97
  12 -10  -1   34.44    2.77
  12 -10  -1   33.31    2.57
 -12 -10   1   32.15    3.15
  12 -10  -1   33.57    2.24
 -12 -10   1   28.34    2.54
  12  10  -1   33.74    3.10
 -12  10   1   33.07    2.52
 -12  10   1   29.86    2.87
 -12  10   1   31.67    2.51
 -12  10   1   29.93    2.69
  12  10  -1   32.56    2.10
 -12  10   1   34.18    2.94
  12  10  -1   32.55    2.20
 -10 -10   1   36.72    2.61
 -10 -10   1   34.66    3.35
  10 -10  -1   34.20    2.62
  10 -10  -1   40.41    2.38
  10 -10  -1   36.34    2.76
 -10  10   1   34.47    2.90
  10  10  -1   35.10    2.79
 -10  10   1   32.24    2.46
 -10  10   1   41.35    2.80
  10  10  -1   34.45    2.20
 -10  10   1   32.67    2.62
  10  10  -1   37.71    2.38
 -10  10   1   38.00    2.63
  -8 -10   1   10.26    2.14
   8 -10  -1    9.18    1.69
   8 -10  -1    8.56    1.69
  -8 -10   1    8.91    1.74
   8 -10  -1   12.39    1.54
  -8  10   1    7.15    1.52
  -8  10   1   10.45    1.87
   8  10  -1   11.67    1.61
   8  10  -1    9.96    1.42
  -8  10   1   10.16    1.76
  -8  10   1   10.15    1.85
  -8  10   1    9.82    1.61
   8  10  -1   11.55    1.85
   6 -10  -1   33.21    2.55
  -6 -10   1   38.76    2.57
   6 -10  -1   35.66    2.78
  -6 -10   1   36.72    2.90
   6 -10  -1   42.87    2.33
  -6  10   1   42.46    2.92
  -6  10   1   41.30    2.94
   6  10  -1   41.64    2.62
  -6  10   1   40.86    2.86
   6  10  -1   40.38    2.88
   6  10  -1   42.26    2.45
  -6  10   1   42.19    2.61
   4 -10  -1    2.37    1.25
  -4 -10   1    2.39    1.27
  -4 -10   1    5.92    1.62
   4 -10  -1    4.50    1.09
   4 -10  -1    5.03    1.47
   4  10  -1    4.46    1.24
  -4  10   1    5.34    1.54
  -4  10   1    6.57    1.53
   4  10  -1    4.11    1.42
   4  10  -1    2.76    1.03
  -4  10   1    3.62    1.28
  -4  10   1    5.39    1.19
   2 -10  -1   46.85    2.41
  -2 -10   1   43.56    3.07
  -2 -10   1   51.97    3.04
   2 -10  -1   52.99    3.14
   2 -10  -1   50.42    3.24
  -2  10   1   47.17    2.93
  -2  10   1   49.10    3.09
  -2  10   1   45.14    2.61
  -2  10   1   47.64    2.94
   2  10  -1   44.44    2.82
   2  10  -1   46.45    2.64
   2  10  -1   46.96    3.05
   0 -10  -1   22.60    1.73
   0 -10  -1   23.97    2.72
   0 -10  -1   25.36    2.49
   0 -10   1   24.02    2.49
   0 -10   1   21.45    2.50
   0  10   1   17.91    1.86
   0  10   1   24.11    2.35
   0  10  -1   20.42    2.29
   0  10   1   23.09    2.53
   0  10  -1   22.19    2.18
   0  10  -1   22.51    2.23
  -2 -10  -1   28.62    2.33
   2 -10   1   29.44    2.37
   2 -10   1   34.30    2.78
  -2 -10  -1   38.81    2.98
   2  10   1   26.84    2.47
  -2  10  -1   19.57    2.01
  -2  10  -1   26.49    2.56
  -2  10  -1   23.18    2.50
   2  10   1   20.81    2.34
   2  10   1   26.28    1.99
   4 -10   1   37.52    2.72
  -4 -10  -1   41.51    3.11
   4 -10   1   37.95    2.78
  -4 -10  -1   38.64    2.62
   4  10   1   46.12    3.05
  -4  10  -1   45.23    2.99
   4  10   1   47.25    2.74
  -4  10  -1   45.39    2.72
   4  10   1   44.82    2.48
  -4  10  -1   46.79    3.02
  -4  10  -1   47.19    2.70
  -6 -10  -1    5.15    1.41
   6 -10   1    6.88    1.54
  -6 -10  -1    4.99    1.76
   6 -10   1    5.01    1.42
  -6  10  -1    6.70    1.43
  -6  10  -1    3.63    1.30
  -6  10  -1    3.37    1.31
   6  10   1    4.96    1.06
   6  10   1    6.40    1.58
   6  10   1    4.70    1.18
  -6  10  -1    6.49    1.38
   8 -10   1   46.57    3.07
  -8 -10  -1   48.11    3.31
   8 -10   1   52.19    3.14
  -8 -10  -1   51.32    3.04
  -8  10  -1   52.34    3.03
  -8  10  -1   51.69    3.24
   8  10   1   54.63    2.63
   8  10   1   58.28    3.35
  -8  10  -1   53.93    3.04
  -8  10  -1   51.45    3.28
   8  10   1   55.70    2.81
 -10 -10  -1    1.83    1.13
  10 -10   1    3.78    1.39
 -10 -10  -1    1.05    1.50
  10 -10   1    4.65    1.39
 -10  10  -1    1.92    1.36
  10  10   1    1.11    0.90
 -10  10  -1    3.39    1.25
  10  10   1    2.44    1.12
 -10  10  -1    4.07    1.35
 -10  10  -1    2.72    1.20
 -10  10  -1    1.59    1.32
  10  10   1    3.31    0.96
 -12 -10  -1   48.84    3.51
  12 -10   1   43.66    2.88
  12 -10   1   51.85    3.00
  12 -10   1   50.52    3.24
 -12 -10  -1   47.48    2.86
 -12  10  -1   50.39    2.96
 -12  10  -1   47.09    2.95
  12  10   1   47.02    2.37
 -12  10  -1   41.06    3.08
  12  10   1   47.24    3.13
  12  10   1   44.14    2.44
 -12  10  -1   53.02    3.03
 -12  10  -1   46.30    3.11
 -14 -10  -1   13.39    1.92
  14 -10   1   12.95    2.04
 -14 -10  -1   18.50    2.58
  14 -10   1   13.70    1.92
  14 -10   1   14.88    1.98
  14 -10   1   22.01    3.02
 -14  10  -1   17.45    2.21
 -14  10  -1   17.63    2.23
  14  10   1   18.11    2.32
  14  10   1   16.18    1.66
 -14  10  -1   14.14    1.99
 -14  10  -1   15.01    2.28
  14  10   1   13.82    1.49
 -14  10  -1   14.58    1.98
  16 -10   1   31.29    2.41
  16 -10   1   28.92    2.80
  16 -10   1   35.33    2.66
  16 -10   1   32.17    2.18
 -16 -10  -1   28.30    2.58
 -16 -10  -1   32.63    3.27
  16  10   1   26.35    1.79
 -16  10  -1   32.25    2.45
 -16  10  -1   24.41    2.71
 -16  10  -1   23.72    2.53
 -16  10  -1   28.32    2.66
  16  10   1   27.55    2.82
 -16  10  -1   23.84    2.45
  18 -10   1   25.85    2.46
  18 -10   1   26.34    2.06
  18 -10   1   24.55    2.50
 -18 -10  -1   30.74    3.27
 -18 -10  -1   28.51    2.69
  18 -10   1   25.90    2.71
 -18  10  -1   30.75    2.44
  18  10   1   29.54    1.89
 -18  10  -1   34.66    2.74
 -18  10  -1   33.30    2.64
 -18  10  -1   29.17    2.75
 -18  10  -1   25.27    2.73
  18  10   1   25.63    2.67
  20 -10   1    9.60    1.84
  20 -10   1    5.38    1.51
 -20 -10  -1    5.71    1.75
  20 -10   1    5.47    1.26
 -20 -10  -1    9.03    1.69
  20  10   1    9.50    1.25
 -20  10  -1    8.61    1.83
 -20  10  -1    9.44    1.67
 -20  10  -1    6.98    1.88
 -20  10  -1    8.23    1.71
  20  10   1    8.30    1.84
 -20  10  -1    9.72    1.85
 -22 -10  -1   30.61    3.24
 -22 -10  -1   32.67    2.56
  22 -10   1   26.48    2.39
  22 -10   1   31.31    2.97
  22 -10   1   25.45    2.88
 -22  10  -1   32.51    3.11
 -22  10  -1   31.98    2.45
 -22  10  -1   25.48    2.80
  22  10   1   29.10    2.94
 -22  10  -1   26.68    3.04
 -22  10  -1   21.99    2.54
  22  10   1   24.68    1.69
 -24 -10  -1    1.04    1.20
  24 -10   1    0.39    0.95
  24 -10   1   -0.54    1.05
 -24 -10  -1   -0.07    1.53
  24 -10   1   -0.45    1.26
 -24  10  -1   -0.76    1.35
  24  10   1    0.35    0.66
 -24  10  -1    0.46    1.20
 -24  10  -1    2.37    1.65
 -24  10  -1    0.87    1.37
 -24  10  -1    1.45    1.23
  24  10   1   -0.30    1.21
 -26 -10  -1   27.83    3.11
 -26 -10  -1   22.37    2.38
  26 -10   1   17.53    2.37
  26 -10   1   21.99    2.23
  26 -10   1   20.21    2.72
 -26  10  -1   17.95    2.67
  26  10   1   21.39    2.71
 -26  10  -1   17.60    2.52
 -26  10  -1   20.44    2.15
 -26  10  -1   21.62    2.77
  26  10   1   17.92    1.58
  28 -10   1   11.65    2.10
  28 -10   1   11.06    1.86
 -28 -10  -1   12.57    2.35
  28 -10   1    7.31    1.95
 -28 -10  -1   10.98    1.77
  28  10   1   12.36    1.33
  28  10   1    8.66    1.86
 -28  10  -1   11.65    2.40
 -28  10  -1    8.17    1.97
 -28  10  -1   10.98    2.11
  30 -10   1   11.81    1.90
 -30 -10  -1   15.16    2.39
  30 -10   1   15.78    2.44
  30 -10   1   11.43    2.20
  30  10   1   10.16    2.06
 -30  10  -1    9.73    2.00
 -30  10  -1   11.71    2.39
 -30  10  -1    5.14    1.89
  30  10   1   10.12    1.23
 -32 -10  -1   21.44    2.91
  32 -10   1   24.84    2.64
  32 -10   1   21.94    2.75
  32 -10   1   26.51    3.01
 -32  10  -1   23.77    2.97
  32  10   1   22.27    1.65
 -32  10  -1   25.04    2.99
  32  10   1   20.77    2.65
 -32  10  -1   21.09    3.12
 -34 -10  -1    1.86    1.76
  34 -10   1    2.63    1.50
  34 -10   1    3.65    1.47
  34 -10   1   -0.30    1.28
  34  10   1    3.80    1.72
  34  10   1    0.52    0.75
 -34  10  -1    0.80    1.56
 -34  10  -1    0.19    1.60
 -34  10  -1   -0.44    1.64
  36 -10   1   22.61    2.86
 -36 -10  -1   27.64    3.13
  36 -10   1   24.53    3.06
 -36  10  -1   23.55    3.03
 -36  10  -1   22.29    3.26
 -36  10  -1   17.48    2.77
  36  10   1   21.01    2.88
  36  10   1   21.93    1.64
  38 -10   1    2.28    1.50
  38 -10   1    2.47    1.57
 -38 -10  -1   -0.21    1.65
 -38  10  -1    1.87    1.91
 -38  10  -1    2.33    1.91
  38  10   1    2.29    0.84
  38  10   1    0.10    1.40
 -38  10  -1    2.77    1.93
  31 -11  -1    6.68    2.02
 -31 -11   1    4.57    1.98
  31 -11  -1    6.30    1.64
  31  11  -1    8.68    1.47
 -31  11   1    7.94    2.22
 -31  11   1    8.26    2.39
  31  11  -1    9.19    2.35
 -31  11   1    7.81    2.20
 -29 -11   1   28.99    3.24
  29 -11  -1   26.68    2.89
  29 -11  -1   31.98    3.46
 -29  11   1   22.09    3.13
 -29  11   1   21.61    2.98
  29  11  -1   30.06    3.23
 -29  11   1   28.95    3.88
 -29  11   1   20.93    2.85
  29  11  -1   28.46    2.12
  27 -11  -1    1.51    1.59
  27 -11  -1    0.56    1.18
 -27 -11   1    3.94    1.85
 -27  11   1   -0.79    1.61
 -27  11   1    1.89    1.44
  27  11  -1    3.52    1.06
 -27  11   1    1.73    1.76
 -27  11   1    2.63    1.65
  27  11  -1    0.69    1.58
  25 -11  -1   27.80    3.24
  25 -11  -1   30.43    2.89
 -25 -11   1   33.20    3.60
 -25  11   1   26.33    3.06
 -25  11   1   24.81    2.81
 -25  11   1   28.23    3.25
 -25  11   1   29.99    2.87
 -25  11   1   24.56    3.19
  25  11  -1   33.42    3.42
  25  11  -1   28.55    2.16
  23 -11  -1    3.10    1.26
 -23 -11   1    1.25    1.26
  23 -11  -1    1.90    1.50
 -23 -11   1    4.75    1.85
 -23  11   1    2.09    1.74
 -23  11   1    3.11    1.60
  23  11  -1    4.02    1.78
 -23  11   1    3.15    1.49
 -23  11   1    2.45    1.79
  23  11  -1    0.96    0.94
 -23  11   1    1.12    1.43
 -21 -11   1   12.41    2.29
  21 -11  -1   11.41    2.17
  21 -11  -1   12.81    1.89
 -21 -11   1   13.43    2.03
  21  11  -1    8.28    1.38
 -21  11   1    7.54    2.03
 -21  11   1    9.00    1.90
 -21  11   1    8.03    2.09
 -21  11   1   12.42    2.24
  21  11  -1    8.62    2.04
 -21  11   1   12.21    2.02
 -19 -11   1   28.23    3.32
 -19 -11   1   22.55    2.46
  19 -11  -1   24.62    3.03
  19 -11  -1   25.84    2.47
  19  11  -1   20.48    2.01
 -19  11   1   20.54    2.87
 -19  11   1   18.63    2.61
  19  11  -1   17.08    2.42
 -19  11   1   13.75    2.11
 -19  11   1   23.77    2.75
 -19  11   1   19.80    2.65
  17 -11  -1   15.95    1.97
  17 -11  -1   18.24    2.56
 -17 -11   1   22.39    2.46
 -17 -11   1   18.92    2.75
  17 -11  -1   19.62    2.42
 -17  11   1   11.74    2.02
 -17  11   1   13.75    2.30
 -17  11   1   10.71    2.26
  17  11  -1   10.38    2.14
 -17  11   1   11.88    2.02
  17  11  -1   12.28    2.19
 -17  11   1   10.71    2.06
  17  11  -1   13.13    1.60
  15 -11  -1   30.81    2.33
 -15 -11   1   27.42    2.62
  15 -11  -1   24.75    2.63
 -15 -11   1   25.02    3.08
  15 -11  -1   27.60    3.08
 -15  11   1   20.37    2.71
 -15  11   1   25.00    2.95
 -15  11   1   27.47    2.83
  15  11  -1   23.65    2.82
 -15  11   1   25.33    2.74
  15  11  -1   25.54    2.31
 -15  11   1   27.32    2.83
  15  11  -1   24.15    2.17
 -13 -11   1    2.36    1.60
  13 -11  -1    2.05    1.42
  13 -11  -1    2.85    1.44
 -13 -11   1    3.88    1.38
 -13  11   1    0.49    1.20
  13  11  -1    2.35    1.07
 -13  11   1    0.84    1.39
  13  11  -1    1.66    1.10
 -13  11   1    3.15    1.38
 -13  11   1    3.75    1.64
  13  11  -1    4.32    1.50
 -11 -11   1   38.49    2.84
  11 -11  -1   34.39    3.20
  11 -11  -1   33.88    3.25
 -11 -11   1   30.05    3.33
 -11  11   1   29.22    2.99
 -11  11   1   30.66    2.93
 -11  11   1   31.37    2.87
  11  11  -1   41.21    3.11
  11  11  -1   34.83    2.36
  11  11  -1   32.48    2.46
 -11  11   1   28.73    2.97
  -9 -11   1    3.50    1.38
   9 -11  -1    6.62    1.70
   9 -11  -1    3.31    1.41
  -9 -11   1    5.37    1.88
  -9  11   1    6.30    1.54
  -9  11   1    7.09    1.79
   9  11  -1    6.82    1.39
   9  11  -1    5.05    1.69
   9  11  -1    6.99    1.47
  -9  11   1    6.70    1.86
  -9  11   1    4.13    1.41
   7 -11  -1   37.63    3.32
  -7 -11   1   36.34    3.56
  -7 -11   1   36.13    2.79
   7 -11  -1   30.59    3.06
  -7  11   1   39.26    2.82
   7  11  -1   35.98    2.68
  -7  11   1   40.65    3.05
  -7  11   1   39.86    3.19
   7  11  -1   41.54    2.60
   7  11  -1   44.51    3.21
  -7  11   1   40.39    3.18
  -5 -11   1   23.24    2.90
   5 -11  -1   22.90    2.77
   5 -11  -1   25.21    2.75
  -5 -11   1   25.24    2.66
   5  11  -1   25.45    2.50
  -5  11   1   22.48    2.59
   5  11  -1   31.29    2.99
   5  11  -1   22.95    2.20
  -5  11   1   25.86    2.71
  -5  11   1   21.68    2.57
  -5  11   1   27.48    2.54
  -3 -11   1   13.67    2.36
  -3 -11   1   12.60    2.05
   3 -11  -1   12.97    2.00
   3 -11  -1   14.10    2.30
  -3  11   1   17.76    2.00
  -3  11   1   14.67    2.22
   3  11  -1   13.79    2.12
   3  11  -1   14.35    1.97
  -3  11   1   20.11    2.47
   3  11  -1   18.05    2.03
  -3  11   1   17.50    2.34
   1 -11  -1   29.69    3.17
   1 -11  -1   29.77    2.84
  -1 -11   1   33.59    3.27
  -1 -11   1   30.41    2.93
  -1  11   1   30.58    2.87
   1  11  -1   28.37    2.50
  -1  11   1   26.52    2.74
   1  11  -1   25.61    2.56
  -1  11   1   21.16    2.53
  -1  11   1   26.12    2.38
   1  11  -1   20.69    2.44
  -1 -11  -1    3.02    1.42
   1 -11   1    0.12    1.48
   1 -11   1   -0.28    0.98
  -1 -11  -1    0.42    1.45
  -1  11  -1    1.98    1.29
  -1  11  -1    1.09    1.17
   1  11   1    3.47    1.28
  -1  11  -1    0.58    1.10
   1  11   1    1.55    1.26
   1  11   1    2.34    1.29
   1  11   1    1.84    1.09
  -3 -11  -1   33.39    3.10
   3 -11   1   26.56    2.84
  -3 -11  -1   30.12    3.16
   3 -11   1   33.67    3.07
   3  11   1   26.11    2.35
  -3  11  -1   22.16    2.56
   3  11   1   26.12    2.75
  -3  11  -1   23.99    2.60
  -3  11  -1   26.08    2.49
   3  11   1   28.70    2.44
   5 -11   1   18.72    2.47
  -5 -11  -1   16.08    2.20
  -5 -11  -1   17.86    2.58
   5 -11   1   15.06    2.29
   5  11   1   14.65    1.76
   5  11   1   15.40    2.00
   5  11   1   15.26    2.32
  -5  11  -1   18.99    2.50
  -5  11  -1   17.33    2.08
  -5  11  -1   13.74    2.22
   7 -11   1   30.78    3.05
  -7 -11  -1   33.17    3.43
  -7 -11  -1   31.79    2.92
   7 -11   1   32.32    3.12
  -7  11  -1   28.50    2.96
   7  11   1   33.55    2.32
  -7  11  -1   30.88    2.75
  -7  11  -1   36.93    2.91
   7  11   1   32.07    2.50
  -7  11  -1   35.52    3.11
   7  11   1   36.56    3.35
   9 -11   1   22.30    2.61
  -9 -11  -1   17.05    2.61
  -9 -11  -1   19.30    2.45
   9 -11   1   24.67    2.76
   9  11   1   21.55    2.15
  -9  11  -1   17.17    2.38
   9  11   1   19.90    2.50
  -9  11  -1   17.56    2.28
   9  11   1   19.54    1.95
  -9  11  -1   20.09    2.46
  -9  11  -1   18.61    2.24
  -9  11  -1   19.49    2.37
  11 -11   1    6.83    1.65
 -11 -11  -1   10.03    1.85
 -11 -11  -1    7.41    2.07
  11 -11   1    8.47    1.78
  11  11   1   12.14    1.57
 -11  11  -1    8.81    1.75
 -11  11  -1   11.54    2.17
 -11  11  -1    6.10    1.62
  11  11   1   12.33    2.19
 -11  11  -1   10.07    1.92
 -11  11  -1   11.36    2.11
 -13 -11  -1   30.66    2.93
  13 -11   1   33.42    3.24
 -13 -11  -1   29.51    3.41
  13 -11   1   26.54    2.76
 -13  11  -1   20.83    2.64
 -13  11  -1   19.99    2.29
 -13  11  -1   26.38    2.84
  13  11   1   22.06    2.70
  13  11   1   19.68    1.90
 -13  11  -1   19.32    2.42
 -13  11  -1   18.72    2.42
  15 -11   1    2.98    1.40
 -15 -11  -1    3.24    1.39
  15 -11   1    1.45    1.41
 -15 -11  -1    0.50    1.61
 -15  11  -1    0.75    1.24
 -15  11  -1    0.81    1.29
  15  11   1   -0.42    1.19
 -15  11  -1    0.08    1.30
 -15  11  -1   -0.10    1.35
 -15  11  -1    0.46    1.33
  15  11   1    0.82    0.81
  17 -11   1   37.66    3.43
 -17 -11  -1   38.54    2.92
  17 -11   1   41.11    4.62
 -17 -11  -1   37.74    3.75
 -17  11  -1   28.87    3.10
 -17  11  -1   35.27    3.19
 -17  11  -1   36.03    3.04
  17  11   1   34.11    3.31
 -17  11  -1   36.18    3.25
 -17  11  -1   34.88    3.00
  17  11   1   27.39    2.05
  19 -11   1    1.45    1.49
  19 -11   1    1.71    1.37
 -19 -11  -1   -0.17    1.20
 -19 -11  -1    1.10    1.50
  19  11   1    1.69    1.50
 -19  11  -1    3.07    1.72
 -19  11  -1    1.58    1.37
  19  11   1    1.71    0.91
 -19  11  -1    3.03    1.62
 -19  11  -1    1.32    1.51
 -19  11  -1    2.27    1.49
 -21 -11  -1   23.76    2.61
  21 -11   1   25.46    3.16
  21 -11   1   24.68    2.82
 -21 -11  -1   23.98    3.15
 -21  11  -1   25.54    2.77
 -21  11  -1   23.16    2.56
 -21  11  -1   24.69    2.82
  21  11   1   24.42    3.02
 -21  11  -1   23.57    3.03
 -21  11  -1   22.34    2.69
  21  11   1   23.35    1.86
 -23 -11  -1    6.82    1.71
  23 -11   1    7.62    1.91
 -23 -11  -1    3.97    1.86
  23 -11   1    5.43    1.82
 -23  11  -1    5.47    1.62
 -23  11  -1    9.24    2.09
 -23  11  -1    5.18    1.96
 -23  11  -1    6.17    2.01
  23  11   1    5.44    1.86
  23  11   1    6.96    1.20
 -25 -11  -1   10.86    2.21
 -25 -11  -1    9.31    1.86
  25 -11   1    6.53    2.08
  25 -11   1   10.45    2.14
 -25  11  -1   12.23    2.34
 -25  11  -1   12.28    2.30
  25  11   1   12.96    2.32
  25  11   1   10.36    1.33
 -25  11  -1    3.63    1.93
 -27 -11  -1   16.81    2.66
  27 -11   1   19.58    2.77
 -27 -11  -1   23.14    3.32
  27 -11   1   19.16    2.81
  27  11   1   19.86    1.76
 -27  11  -1   19.59    2.84
 -27  11  -1   22.30    3.02
  27  11   1   23.57    3.11
 -27  11  -1   23.96    3.02
 -29 -11  -1    1.03    1.73
  29 -11   1   -0.71    1.27
  29 -11   1    2.21    1.61
 -29  11  -1    0.81    1.59
  29  11   1   -0.05    1.37
 -29  11  -1    0.03    1.51
  29  11   1    1.40    0.83
 -29  11  -1   -0.39    1.57
  31 -11   1   23.36    3.03
 -31 -11  -1   28.02    3.42
  31 -11   1   27.22    3.19
 -31  11  -1   26.49    3.51
  31  11   1   26.01    3.16
 -31  11  -1   24.74    3.22
  31  11   1   23.77    1.78
 -31  11  -1   20.73    2.87
  22 -12  -1   -1.63    1.27
 -22 -12   1    1.80    1.70
 -22  12   1    0.17    1.45
  22  12  -1    0.10    0.96
 -22  12   1    0.16    1.60
  22  12  -1    2.71    1.61
 -22  12   1    2.27    1.88
 -22  12   1    2.66    1.90
 -22  12   1    1.74    1.54
 -20 -12   1   21.41    2.60
 -20 -12   1   19.77    3.03
  20 -12  -1   27.64    3.31
 -20  12   1   19.61    2.70
 -20  12   1   17.12    2.57
  20  12  -1   22.68    2.20
 -20  12   1   16.47    2.82
  20  12  -1   20.32    2.95
 -20  12   1   18.16    2.50
 -18 -12   1    0.77    1.66
 -18 -12   1    1.13    1.39
  18 -12  -1    3.04    1.74
 -18  12   1    2.08    1.50
 -18  12   1    2.99    1.63
 -18  12   1    2.50    1.56
 -18  12   1    1.15    1.65
  18  12  -1    0.47    1.01
  18  12  -1    0.49    1.35
 -16 -12   1   30.76    3.65
  16 -12  -1   19.90    2.87
 -16 -12   1   25.25    2.72
 -16  12   1   18.85    2.73
  16  12  -1   18.41    2.10
 -16  12   1   19.63    2.57
 -16  12   1   17.16    2.78
  16  12  -1   16.83    2.65
 -16  12   1   14.55    2.29
 -14 -12   1   11.08    2.64
 -14 -12   1   12.94    2.10
  14 -12  -1   12.52    2.26
  14 -12  -1   13.18    2.37
  14  12  -1   14.13    1.89
 -14  12   1   15.36    2.54
 -14  12   1   12.15    2.30
 -14  12   1   16.09    2.37
 -14  12   1   15.89    2.47
  14  12  -1   15.45    2.54
  12 -12  -1   10.17    2.11
  12 -12  -1    7.28    1.99
 -12 -12   1   12.34    2.69
 -12 -12   1   10.13    1.97
 -12  12   1    7.69    2.05
  12  12  -1    8.48    2.15
 -12  12   1    9.39    2.17
 -12  12   1   10.49    2.19
  12  12  -1    8.25    1.48
  12  12  -1   13.08    2.16
 -12  12   1    8.60    1.88
 -10 -12   1   23.46    2.61
 -10 -12   1   26.43    3.31
  10 -12  -1   25.67    2.93
  10 -12  -1   28.46    3.12
 -10  12   1   29.04    2.95
  10  12  -1   25.67    3.04
  10  12  -1   29.16    2.66
 -10  12   1   28.54    3.22
  10  12  -1   30.80    2.47
 -10  12   1   23.92    2.78
 -10  12   1   24.91    3.01
  -8 -12   1    4.11    1.52
   8 -12  -1    1.83    1.39
  -8 -12   1    2.94    1.94
   8 -12  -1    6.00    1.77
  -8  12   1    3.68    1.52
   8  12  -1    6.66    1.52
  -8  12   1    5.99    1.78
  -8  12   1    5.90    1.70
  -8  12   1    3.59    1.71
   8  12  -1    3.19    1.57
   8  12  -1    3.79    1.47
   6 -12  -1   31.01    3.15
  -6 -12   1   29.16    2.87
  -6 -12   1   28.59    3.32
   6 -12  -1   29.47    3.18
  -6  12   1   24.70    2.82
   6  12  -1   29.70    2.86
  -6  12   1   28.18    2.70
  -6  12   1   27.71    2.94
   6  12  -1   32.01    2.59
  -6  12   1   27.45    3.04
   6  12  -1   33.96    3.38
   4 -12  -1    2.06    1.46
   4 -12  -1    0.81    1.58
  -4 -12   1    3.31    1.84
  -4 -12   1    2.32    1.43
  -4  12   1    0.74    1.44
   4  12  -1    2.28    1.50
  -4  12   1    0.66    1.11
  -4  12   1    1.03    1.34
   4  12  -1   -0.36    1.22
  -4  12   1    0.47    1.20
   4  12  -1    1.64    1.19
   2 -12  -1   34.77    3.39
  -2 -12   1   30.18    3.05
  -2 -12   1   23.23    3.09
   2 -12  -1   28.17    3.18
  -2  12   1   29.86    3.20
  -2  12   1   21.40    2.63
   2  12  -1   26.94    2.85
   2  12  -1   25.23    2.52
  -2  12   1   33.81    3.27
   2  12  -1   26.74    3.00
  -2  12   1   30.42    2.55
   0 -12   1   10.84    2.29
   0 -12  -1    5.58    1.70
   0 -12   1    6.38    1.69
   0 -12  -1    7.70    2.17
   0  12   1    7.73    2.02
   0  12   1    7.77    1.98
   0  12  -1    6.33    1.59
   0  12   1    5.63    1.47
   0  12  -1    7.33    1.82
   0  12  -1    6.37    1.79
   0  12   1    2.70    1.45
  -2 -12  -1   13.48    2.59
   2 -12   1   12.89    2.34
   2 -12   1   12.28    2.20
  -2 -12  -1   13.94    2.28
   2  12   1   13.20    2.27
   2  12   1   12.92    1.91
  -2  12  -1   14.02    2.32
   2  12   1   12.55    2.23
  -2  12  -1   10.67    2.02
  -2  12  -1   12.17    2.14
  -2  12  -1    7.92    1.69
   2  12   1   14.18    2.17
  -4 -12  -1   21.79    3.07
   4 -12   1   20.48    2.71
   4 -12   1   22.33    2.87
  -4 -12  -1   17.07    2.35
  -4  12  -1   16.11    2.56
  -4  12  -1   19.51    2.60
  -4  12  -1   14.50    2.23
   4  12   1   14.15    2.37
   4  12   1   14.78    2.49
  -4  12  -1   15.96    2.17
   4  12   1   14.87    2.19
   4  12   1   13.62    1.88
   6 -12   1    1.48    1.44
  -6 -12  -1    0.77    1.42
   6 -12   1    2.63    1.57
  -6 -12  -1    2.15    1.90
  -6  12  -1    1.43    1.52
  -6  12  -1    0.88    1.42
  -6  12  -1    1.39    1.26
   6  12   1    2.16    1.38
  -6  12  -1    2.62    1.41
   6  12   1    0.85    1.45
   6  12   1    2.05    1.38
   6  12   1    1.94    1.09
   8 -12   1   31.17    3.25
  -8 -12  -1   21.29    2.96
   8 -12   1   29.11    3.07
  -8 -12  -1   37.38    3.40
  -8  12  -1   29.68    2.90
  -8  12  -1   30.12    2.99
  -8  12  -1   29.59    3.23
  -8  12  -1   27.70    3.14
   8  12   1   27.52    2.51
   8  12   1   29.34    3.15
  10 -12   1    0.09    1.38
 -10 -12  -1    1.31    1.44
 -10 -12  -1    0.82    1.86
  10 -12   1   -1.17    1.13
 -10  12  -1    0.29    1.37
 -10  12  -1    0.15    1.34
 -10  12  -1    1.51    1.49
 -10  12  -1    0.00    1.25
  10  12   1   -0.23    0.89
  10  12   1   -1.19    1.33
 -12 -12  -1   11.68    2.18
  12 -12   1   21.38    2.79
  12 -12   1   16.47    2.44
 -12 -12  -1   15.83    2.83
 -12  12  -1   16.27    2.61
 -12  12  -1   11.32    2.23
  12  12   1   12.58    2.39
 -12  12  -1   15.01    2.28
  12  12   1   14.46    1.85
 -12  12  -1   15.65    2.36
 -14 -12  -1    9.64    2.03
 -14 -12  -1    8.80    2.41
  14 -12   1    6.42    1.94
  14 -12   1   10.11    2.12
  14  12   1    7.44    2.08
 -14  12  -1    4.18    1.67
 -14  12  -1    6.21    1.85
 -14  12  -1    5.39    2.02
 -14  12  -1    7.65    1.86
  14  12   1    5.21    1.28
 -16 -12  -1   11.99    2.65
  16 -12   1   10.37    2.21
 -16 -12  -1   11.23    2.03
  16  12   1   11.40    2.26
 -16  12  -1   10.61    2.13
 -16  12  -1   12.73    2.10
  16  12   1   13.05    1.73
 -16  12  -1    8.11    2.18
 -16  12  -1   10.63    2.26
 -16  12  -1    8.76    2.08
  18 -12   1   24.14    3.04
 -18 -12  -1   18.21    2.53
 -18 -12  -1   20.75    3.18
 -18  12  -1   19.74    2.83
  18  12   1   20.75    2.04
 -18  12  -1   26.18    2.96
 -18  12  -1   19.80    2.57
 -18  12  -1   21.03    2.87
 -18  12  -1   24.81    3.22
  18  12   1   22.34    2.82
 -20 -12  -1    4.27    2.03
 -20 -12  -1    0.25    1.34
  20 -12   1    5.87    1.98
 -20  12  -1    2.81    1.59
 -20  12  -1    2.37    1.72
 -20  12  -1    3.21    1.96
  20  12   1    4.09    1.19
  20  12   1    3.23    1.73
 -20  12  -1    3.11    1.80
 -20  12  -1    2.70    1.52
 -22 -12  -1   26.14    2.81
  22 -12   1   35.21    3.72
 -22 -12  -1   24.93    3.30
 -22  12  -1   29.10    3.26
  22  12   1   22.61    2.98
 -22  12  -1   23.75    3.18
 -22  12  -1   26.75    3.14
  22  12   1   33.45    2.29
  62   0  -2    3.12    1.57
  62   0  -2    4.65    1.60
  60   0  -2    8.04    1.77
  60   0  -2    5.77    1.79
  58   0  -2    8.75    2.01
  58   0  -2   10.19    1.87
  56   0  -2    6.36    1.71
  56   0  -2    8.36    1.67
  54   0  -2   23.32    2.47
  54   0  -2   17.53    2.29
  52   0  -2    0.82    1.15
 -52   0   2    1.62    0.96
  52   0  -2    0.98    1.04
 -50   0   2   32.93    2.08
  50   0  -2   32.82    2.50
  50   0  -2   36.26    2.76
 -48   0   2   18.07    1.74
  48   0  -2   13.58    1.86
  48   0  -2   15.82    1.89
  46   0  -2   28.41    2.21
 -46   0   2   34.30    2.09
 -46   0   2   27.06    1.99
  46   0  -2   29.47    2.64
 -44   0   2   59.17    2.56
  44   0  -2   56.87    2.51
  44   0  -2   58.01    2.93
 -44   0   2   56.61    2.64
  44   0  -2   60.00    3.12
 -42   0   2   11.68    1.41
  42   0  -2   13.27    1.61
 -42   0   2   10.10    1.26
  42   0  -2   10.64    1.23
  42   0  -2   13.05    1.79
 -42   0   2   11.64    2.01
  40   0  -2   65.04    3.14
 -40   0   2   65.92    3.09
 -40   0   2   70.37    2.86
  40   0  -2   66.16    2.97
  40   0  -2   70.05    2.64
 -40   0   2   73.32    2.81
 -38   0   2    0.82    0.73
 -38   0   2    1.95    0.81
  38   0  -2    1.57    0.80
 -38   0   2    1.39    1.06
  38   0  -2    1.01    0.79
 -38   0   2    1.25    0.87
  38   0  -2    0.94    0.58
  36   0  -2   97.04    3.19
 -36   0   2   96.57    3.40
  36   0  -2   97.98    3.59
 -36   0   2   91.64    3.85
  36   0  -2  101.99    3.81
 -36   0   2   95.90    3.31
 -36   0   2  101.17    3.73
 -34   0   2    3.07    0.92
 -34   0   2    2.34    0.97
  34   0  -2    2.46    0.68
 -34   0   2    2.38    0.78
  34   0  -2    2.56    0.85
 -34   0   2    3.01    0.84
  34   0  -2    2.16    0.76
 -34   0   2    2.32    0.48
 -32   0   2   37.88    1.89
 -32   0   2   35.25    1.79
  32   0  -2   36.22    2.10
  32   0  -2   31.94    1.60
 -32   0   2   35.95    2.17
 -32   0   2   33.71    1.30
  32   0  -2   34.51    1.09
 -32   0   2   35.87    2.06
  32   0  -2   34.87    1.93
 -30   0   2    7.92    1.04
 -30   0   2    7.50    0.69
  30   0  -2    7.14    0.87
  30   0  -2    6.95    1.03
 -30   0   2    6.40    1.07
 -30   0   2    8.74    1.28
 -30   0   2    7.31    0.96
  30   0  -2    7.89    0.48
  30   0  -2    5.81    0.99
 -28   0   2   22.92    1.74
 -28   0   2   26.55    1.71
  28   0  -2   23.03    0.79
  28   0  -2   21.67    1.22
  28   0  -2   22.47    1.60
  28   0  -2   23.69    1.50
 -28   0   2   22.47    1.04
 -28   0   2   22.88    1.46
 -28   0   2   24.21    1.49
  26   0  -2   54.16    1.43
 -26   0   2   55.53    2.40
 -26   0   2   50.67    2.48
 -26   0   2   53.04    2.18
  26   0  -2   56.19    2.22
  26   0  -2   56.21    2.34
 -26   0   2   57.48    2.20
 -26   0   2   53.62    1.73
  26   0  -2   54.75    1.94
 -22   0   2  253.08    6.57
  22   0  -2  265.57    6.70
  22   0  -2  259.00    5.72
 -22   0   2  261.11    6.95
 -22   0   2  259.70    6.55
 -22   0   2  262.68    6.78
  22   0  -2  273.81    6.58
  22   0  -2  263.62    6.24
 -20   0   2    2.21    0.28
  20   0  -2    2.79    0.57
 -20   0   2    2.10    0.70
 -20   0   2    2.89    0.69
  20   0  -2    2.74    0.64
 -20   0   2    3.07    0.68
 -20   0   2    2.84    0.65
  20   0  -2    2.61    0.24
 -20   0   2    2.27    0.58
  20   0  -2    2.95    0.46
 -18   0   2  116.43    2.85
  18   0  -2  118.78    2.70
 -18   0   2  123.63    3.76
  18   0  -2  125.16    3.13
 -18   0   2  120.17    3.45
  18   0  -2  125.21    3.49
 -18   0   2  118.20    3.56
  18   0  -2  125.67    3.36
 -18   0   2  126.65    3.52
 -18   0   2  120.00    3.48
 -16   0   2  175.17    4.58
  16   0  -2  179.55    4.55
 -16   0   2  175.73    4.85
 -16   0   2  175.76    4.58
  16   0  -2  171.71    4.18
 -16   0   2  179.21    4.62
  16   0  -2  175.02    3.82
  16   0  -2  178.72    4.43
 -16   0   2  172.76    4.06
 -16   0   2  182.38    4.69
  14   0  -2   69.03    2.13
 -14   0   2   70.64    2.24
 -14   0   2   67.70    2.40
 -14   0   2   70.91    2.29
 -14   0   2   66.55    2.20
 -14   0   2   70.32    2.29
 -14   0   2   70.42    1.87
  14   0  -2   71.28    1.89
  14   0  -2   69.25    2.06
  12   0  -2  320.27    6.81
  12   0  -2  320.95    7.07
  12   0  -2  311.74    7.24
  12   0  -2  322.12    7.36
 -12   0   2  318.94    7.15
 -12   0   2  331.48    7.47
 -12   0   2  309.06    7.47
 -12   0   2  317.09    7.42
 -12   0   2  324.43    7.69
 -12   0   2  312.59    7.46
 -10   0   2   45.35    1.52
 -10   0   2   43.59    1.55
  10   0  -2   43.44    1.39
  10   0  -2   44.66    1.08
 -10   0   2   45.66    1.59
 -10   0   2   43.38    1.41
 -10   0   2   43.55    1.05
 -10   0   2   46.00    1.66
  10   0  -2   44.11    1.25
  10   0  -2   47.06    1.48
 -10   0   2   42.83    1.72
  -8   0   2  782.37   17.14
  -8   0   2  775.05   17.07
  -8   0   2  788.23   17.22
  -8   0   2  813.15   16.68
   8   0  -2  806.51   16.97
  -8   0   2  782.28   16.98
   8   0  -2  760.81   16.88
   8   0  -2  777.93   16.65
  -8   0   2  779.97   17.05
  -8   0   2  770.36   17.02
  -6   0   2  203.16    4.68
  -6   0   2  186.46    4.56
  -6   0   2  198.08    4.55
   6   0  -2  180.05    4.45
   6   0  -2  197.30    4.30
  -6   0   2  198.48    4.68
  -6   0   2  186.47    4.55
  -6   0   2  206.90    4.63
   6   0  -2  187.69    4.42
  -4   0   2   52.56    1.54
   4   0  -2   53.93    1.45
  -4   0   2   55.53    1.67
  -4   0   2   54.13    1.56
  -4   0   2   55.36    1.57
  -4   0   2   53.53    1.55
   4   0  -2   54.09    1.40
   4   0  -2   53.21    1.41
   4   0  -2   52.70    1.49
  -4   0   2   57.85    1.73
  -2   0   2  520.29   11.50
  -2   0   2  529.80   11.28
  -2   0   2  514.72   11.30
   2   0  -2  539.10   11.23
  -2   0   2  510.18   11.35
   2   0  -2  534.89   11.16
   2   0  -2  528.84   11.24
  -2   0   2  505.04   11.27
  -2   0   2  492.06   11.16
   0   0   2   64.07    1.60
   0   0   2   59.62    1.60
   0   0   2   58.63    1.56
   0   0  -2   58.39    1.51
   0   0   2   58.44    1.61
   0   0   2   60.14    1.84
   0   0  -2   61.26    1.40
   0   0  -2   59.46    1.56
   2   0   2  400.52    8.85
   2   0   2  404.12    8.82
  -2   0  -2  409.24    8.82
  -2   0  -2  417.44    8.86
   2   0   2  407.59    8.82
   2   0   2  392.94    9.10
   2   0   2  404.76    8.82
  -4   0  -2    0.69    0.30
   4   0   2    0.62    0.25
  -4   0  -2    0.76    0.30
  -4   0  -2    0.89    0.22
   4   0   2    1.07    0.27
  -4   0  -2    1.21    0.27
   4   0   2    0.59    0.23
   4   0   2    0.55    0.23
   4   0   2    1.67    0.45
   4   0   2    0.85    0.16
  -4   0  -2    1.04    0.20
   4   0   2    1.17    0.24
   4   0   2    0.81    0.35
  -6   0  -2   50.48    1.42
   6   0   2   48.88    1.36
  -6   0  -2   49.33    1.25
   6   0   2   49.46    1.60
   6   0   2   51.05    1.53
  -6   0  -2   49.47    1.33
   6   0   2   49.73    1.23
  -6   0  -2   50.73    1.38
   6   0   2   49.43    1.42
   6   0   2   50.11    1.37
   6   0   2   51.71    1.36
  -6   0  -2   51.04    1.50
  -6   0  -2   49.39    1.34
   8   0   2   79.24    1.81
   8   0   2   77.70    2.02
  -8   0  -2   85.41    2.18
   8   0   2   77.88    2.04
   8   0   2   82.45    2.28
  -8   0  -2   80.36    2.21
  -8   0  -2   80.28    2.01
   8   0   2   79.93    2.10
   8   0   2   81.95    2.06
   8   0   2   81.74    2.23
  -8   0  -2   76.76    2.08
  10   0   2  110.36    2.86
  10   0   2  111.44    2.72
 -10   0  -2  113.53    2.90
 -10   0  -2  109.26    2.76
  10   0   2  106.87    2.39
  10   0   2  106.36    2.90
 -10   0  -2  110.85    2.68
  10   0   2  112.09    2.70
  10   0   2  104.32    2.70
  12   0   2  146.51    3.51
  12   0   2  141.27    3.14
 -12   0  -2  140.89    3.56
 -12   0  -2  146.49    3.73
  12   0   2  145.47    3.50
  12   0   2  142.38    3.51
 -12   0  -2  141.28    3.46
  12   0   2  144.35    3.59
  12   0   2  148.64    3.75
  14   0   2   73.74    2.28
 -14   0  -2   74.93    2.03
  14   0   2   69.29    1.68
 -14   0  -2   73.39    2.32
  14   0   2   71.71    2.05
  14   0   2   68.85    2.22
  14   0   2   75.29    2.06
  14   0   2   72.94    2.03
  14   0   2   71.02    2.04
 -14   0  -2   72.34    2.12
 -16   0  -2  251.79    5.91
  16   0   2  262.23    6.23
  16   0   2  248.04    6.20
  16   0   2  253.60    5.95
  16   0   2  243.79    5.92
  16   0   2  245.83    5.86
 -16   0  -2  259.49    6.28
  16   0   2  252.82    5.95
 -16   0  -2  257.82    6.04
 -18   0  -2    4.62    0.78
  18   0   2    4.74    0.74
 -18   0  -2    4.32    0.65
  18   0   2    5.81    0.62
  18   0   2    5.04    0.62
 -18   0  -2    4.20    0.60
  18   0   2    5.67    0.56
  18   0   2    5.08    0.63
  18   0   2    4.35    0.70
  20   0   2   97.88    2.98
 -20   0  -2   96.08    2.87
  20   0   2   92.63    3.01
  20   0   2   90.08    2.73
  20   0   2   98.55    2.80
 -20   0  -2   95.11    3.06
 -20   0  -2   95.83    2.72
  20   0   2   94.27    2.52
  22   0   2   26.16    1.44
  22   0   2   26.85    1.29
  22   0   2   28.66    1.52
  22   0   2   26.81    1.04
  22   0   2   29.80    1.35
 -22   0  -2   30.62    1.48
 -22   0  -2   26.59    1.54
 -22   0  -2   26.70    1.28
  24   0   2  108.98    3.61
  24   0   2  110.32    2.89
 -24   0  -2  118.79    3.70
 -24   0  -2  111.91    3.23
  24   0   2  116.02    3.55
 -24   0  -2  117.78    3.46
  24   0   2  121.42    3.41
  26   0   2  195.42    4.58
 -26   0  -2  196.22    5.00
 -26   0  -2  196.13    5.53
  26   0   2  194.92    5.53
  26   0   2  196.86    5.35
 -26   0  -2  196.32    5.26
  26   0   2  189.07    5.14
  28   0   2   65.38    2.52
 -28   0  -2   65.30    2.70
 -28   0  -2   61.35    2.19
  28   0   2   61.50    2.61
  28   0   2   65.02    2.37
 -28   0  -2   61.65    2.43
  28   0   2   64.14    1.75
 -30   0  -2   99.19    3.55
  30   0   2   94.40    3.47
 -30   0  -2   97.89    3.25
  30   0   2   93.20    2.36
 -30   0  -2   93.85    2.92
  30   0   2   97.84    3.34
 -32   0  -2    2.52    0.73
  32   0   2    2.66    0.91
  32   0   2    1.72    0.73
 -32   0  -2    1.40    0.90
 -32   0  -2    2.84    0.68
 -34   0  -2   35.05    1.64
 -34   0  -2   34.46    2.14
  34   0   2   29.49    1.97
 -34   0  -2   36.46    1.91
  34   0   2   31.79    1.91
  36   0   2   34.78    2.04
  36   0   2   34.10    2.14
 -36   0  -2   33.46    1.65
  38   0   2   30.10    2.17
 -38   0  -2   32.18    1.63
  38   0   2   30.39    1.91
  40   0   2   26.28    1.86
 -40   0  -2   27.42    1.51
  40   0   2   25.81    2.10
  42   0   2   11.57    1.48
  42   0   2   11.70    1.64
 -42   0  -2   10.18    1.09
 -44   0  -2   36.18    1.69
  44   0   2   29.48    2.28
  44   0   2   32.93    2.18
  46   0   2    3.34    1.04
  46   0   2    3.31    1.21
  46   0   2    3.19    1.10
  48   0   2   55.39    3.25
  48   0   2   49.83    2.98
  48   0   2   55.94    2.81
  50   0   2    4.84    1.44
  50   0   2    4.69    1.22
  50   0   2    5.20    1.38
  52   0   2   31.05    2.81
  52   0   2   34.60    2.43
  52   0   2   36.06    3.27
  54   0   2   10.86    2.16
  54   0   2   10.25    1.94
  54   0   2   10.37    1.78
  56   0   2    5.86    1.70
  56   0   2    4.89    1.40
  58   0   2   19.46    2.34
  58   0   2   19.18    2.50
  60   0   2    1.04    1.37
  60   0   2    0.45    1.15
  62   0   2   21.49    2.70
  62   0   2   17.14    2.24
  63  -1  -2   12.84    2.06
  63  -1  -2   10.72    2.20
  63   1  -2   10.65    2.09
  63   1  -2   11.81    2.11
  61  -1  -2    0.55    1.40
  61  -1  -2    2.11    1.29
  61   1  -2    1.33    1.32
  61   1  -2    1.24    1.26
  59  -1  -2   12.61    1.95
  59  -1  -2   15.69    2.48
  59   1  -2   13.98    2.04
  59   1  -2   14.71    2.36
  57  -1  -2    3.14    1.30
  57  -1  -2    3.79    1.65
  57   1  -2    4.04    1.55
  57   1  -2    6.96    1.59
 -57   1   2    8.46    2.11
  55  -1  -2   34.42    2.58
  55  -1  -2   28.90    2.96
  55   1  -2   39.23    2.99
  55   1  -2   38.23    2.84
 -55   1   2   37.54    2.51
  53  -1  -2    6.95    1.49
  53  -1  -2    6.50    1.63
  53   1  -2    5.93    1.49
  53   1  -2    6.55    1.54
 -53   1   2    8.99    1.57
  51  -1  -2   26.05    2.72
  51  -1  -2   26.32    2.42
 -51   1   2   30.60    2.24
  51   1  -2   23.92    2.49
  51   1  -2   29.55    2.73
  49  -1  -2   29.62    2.28
  49  -1  -2   26.72    2.03
  49  -1  -2   32.45    2.51
  49   1  -2   23.91    2.32
  49   1  -2   25.33    2.53
 -49   1   2   27.57    2.13
  47  -1  -2    3.90    1.32
  47  -1  -2    2.12    0.85
  47  -1  -2    2.81    1.06
 -47  -1   2    1.98    0.78
  47   1  -2    0.90    1.08
 -47   1   2    2.95    1.43
  47   1  -2    3.53    1.20
 -47   1   2    4.61    1.21
  45  -1  -2   63.21    2.80
  45  -1  -2   63.23    3.34
 -45  -1   2   64.19    2.59
  45  -1  -2   60.68    2.99
 -45   1   2   58.84    4.01
  45   1  -2   49.90    2.80
 -45   1   2   52.39    2.71
  45   1  -2   54.43    3.00
 -45   1   2   55.32    3.24
 -45   1   2   59.82    2.85
  43  -1  -2    7.61    1.41
  43  -1  -2    9.69    1.44
  43  -1  -2    9.21    1.30
 -43  -1   2    8.30    1.22
 -43  -1   2    8.55    1.16
 -43   1   2    9.73    1.23
 -43   1   2   10.93    1.49
  43   1  -2    9.14    1.52
 -43   1   2    8.31    1.55
  43   1  -2    9.75    1.56
 -43   1   2    7.76    1.56
 -41  -1   2   65.91    2.74
  41  -1  -2   70.42    2.84
 -41  -1   2   70.04    2.69
  41  -1  -2   63.69    2.93
  41  -1  -2   63.56    3.17
  41   1  -2   66.46    3.02
 -41   1   2   67.50    3.49
 -41   1   2   70.38    3.26
 -41   1   2   69.74    2.75
  41   1  -2   65.64    3.08
 -41   1   2   64.22    2.95
  41   1  -2   55.73    2.95
  39  -1  -2   46.88    2.42
  39  -1  -2   48.89    2.31
 -39  -1   2   50.30    2.20
 -39  -1   2   48.39    2.33
  39  -1  -2   46.39    2.61
 -39   1   2   52.07    2.54
  39   1  -2   50.13    2.10
  39   1  -2   55.69    2.83
 -39   1   2   53.06    2.84
  39   1  -2   55.77    2.74
 -39   1   2   53.51    3.05
 -39   1   2   56.46    2.40
 -37  -1   2   28.49    1.70
  37  -1  -2   29.19    1.75
 -37  -1   2   33.03    2.03
  37  -1  -2   26.04    1.82
  37  -1  -2   27.15    1.97
 -37  -1   2   31.35    1.80
 -37  -1   2   28.27    1.99
 -37   1   2   25.30    2.37
 -37   1   2   23.85    1.76
  37   1  -2   25.03    1.83
 -37   1   2   21.93    1.53
  37   1  -2   20.45    1.31
 -37   1   2   22.31    1.92
  37   1  -2   22.19    1.76
 -35  -1   2   72.04    2.71
  35  -1  -2   70.06    2.86
 -35  -1   2   69.44    2.74
  35  -1  -2   71.68    2.75
  35  -1  -2   74.68    3.23
 -35  -1   2   78.63    3.07
 -35  -1   2   71.75    2.31
 -35   1   2   65.69    2.65
 -35   1   2   71.35    3.16
  35   1  -2   66.40    2.94
  35   1  -2   71.68    2.42
 -35   1   2   70.25    2.89
  35   1  -2   69.82    2.97
 -35   1   2   69.53    3.32
  33  -1  -2   30.13    1.96
  33  -1  -2   34.80    1.78
  33  -1  -2   31.82    1.25
 -33  -1   2   34.42    1.79
 -33  -1   2   34.90    2.01
 -33  -1   2   33.33    1.47
 -33  -1   2   34.44    1.82
  33  -1  -2   34.04    1.88
  33   1  -2   29.59    1.42
 -33   1   2   28.63    1.72
  33   1  -2   28.03    1.83
 -33   1   2   27.71    2.05
 -33   1   2   31.99    1.91
  33   1  -2   28.13    1.77
 -33   1   2   33.36    2.29
 -31  -1   2   64.52    2.15
  31  -1  -2   68.31    2.50
 -31  -1   2   66.71    2.50
 -31  -1   2   61.90    2.68
  31  -1  -2   66.08    1.95
  31  -1  -2   68.79    2.59
  31  -1  -2   64.97    2.85
 -31  -1   2   65.55    2.55
 -31   1   2   79.00    3.43
  31   1  -2   78.08    2.46
 -31   1   2   84.62    3.28
  31   1  -2   79.73    3.07
 -31   1   2   72.44    2.07
 -31   1   2   75.31    2.79
 -31   1   2   83.89    3.05
  31   1  -2   80.48    3.06
  29  -1  -2    5.00    0.82
 -29  -1   2    6.80    0.99
 -29  -1   2    7.23    1.09
 -29  -1   2    6.38    0.93
  29  -1  -2    7.16    1.16
  29  -1  -2    7.85    0.63
  29  -1  -2    8.71    1.08
 -29  -1   2    6.41    0.75
 -29   1   2   11.03    1.30
  29   1  -2    9.93    1.24
 -29   1   2   10.04    1.33
 -29   1   2   10.25    1.16
 -29   1   2    9.10    1.37
  29   1  -2   10.59    0.84
  29   1  -2   14.01    1.39
 -29   1   2   10.25    1.14
  27  -1  -2   72.81    2.06
 -27  -1   2   76.89    2.63
  27  -1  -2   69.38    2.48
 -27  -1   2   71.71    2.62
  27  -1  -2   73.85    2.83
  27  -1  -2   78.61    2.66
 -27  -1   2   70.74    2.28
 -27  -1   2   72.90    2.77
 -27   1   2   75.47    3.21
 -27   1   2   77.02    1.94
  27   1  -2   80.65    2.93
 -27   1   2   81.27    2.95
  27   1  -2   84.31    2.43
 -27   1   2   81.91    2.82
 -27   1   2   85.76    3.16
  27   1  -2   85.05    3.00
  27   1  -2   77.75    2.85
 -27   1   2   85.07    2.93
 -25  -1   2   33.31    1.77
  25  -1  -2   36.84    1.86
 -25  -1   2   33.52    1.69
  25  -1  -2   36.36    1.64
  25  -1  -2   33.22    1.53
 -25  -1   2   34.41    1.67
  25  -1  -2   33.66    1.19
 -25  -1   2   34.94    1.43
 -25   1   2   33.70    1.68
 -25   1   2   31.81    1.03
  25   1  -2   29.41    1.59
  25   1  -2   33.95    1.29
  25   1  -2   33.06    1.70
 -25   1   2   30.69    1.66
 -25   1   2   30.26    1.59
 -25   1   2   31.73    1.85
  25   1  -2   31.05    1.59
 -25   1   2   33.89    2.04
 -23  -1   2   91.95    3.02
 -23  -1   2   91.23    2.95
  23  -1  -2   91.68    2.39
 -23  -1   2   89.77    2.65
 -23  -1   2   89.47    2.87
  23  -1  -2   89.73    2.79
  23  -1  -2   96.68    3.13
  23  -1  -2   92.54    2.85
  23   1  -2   82.66    2.71
 -23   1   2   89.36    2.90
  23   1  -2   80.70    2.80
 -23   1   2   76.45    2.10
 -23   1   2   76.62    2.76
  23   1  -2   77.07    2.69
  23   1  -2   84.16    2.28
 -23   1   2   75.42    3.05
 -23   1   2   85.38    2.74
 -23   1   2   83.34    2.98
 -21  -1   2  154.35    3.58
 -21  -1   2  160.36    4.25
  21  -1  -2  158.76    3.76
  21  -1  -2  162.32    4.20
  21  -1  -2  157.96    4.42
  21  -1  -2  156.87    4.15
 -21  -1   2  155.56    4.05
 -21  -1   2  156.43    4.36
 -21  -1   2  156.70    4.35
 -21   1   2  145.04    4.11
 -21   1   2  135.35    3.92
  21   1  -2  142.72    3.96
 -21   1   2  136.91    3.42
  21   1  -2  142.73    3.95
  21   1  -2  143.08    4.02
  21   1  -2  146.62    3.48
 -21   1   2  132.11    4.32
 -21   1   2  142.98    4.10
 -21   1   2  142.94    4.22
 -19  -1   2   16.42    0.66
  19  -1  -2   15.36    0.95
  19  -1  -2   16.08    0.95
  19  -1  -2   15.62    0.71
  19  -1  -2   17.28    1.14
 -19  -1   2   16.65    1.03
 -19  -1   2   14.96    1.08
 -19  -1   2   15.32    1.09
 -19  -1   2   17.67    1.14
  19   1  -2   17.29    0.76
  19   1  -2   18.78    1.09
  19   1  -2   19.81    1.11
 -19   1   2   16.69    0.81
 -19   1   2   17.89    1.26
 -19   1   2   19.36    1.33
 -19   1   2   20.54    1.41
  19   1  -2   16.19    1.10
 -19   1   2   19.01    1.25
 -19   1   2   18.30    1.15
 -17  -1   2  225.32    5.59
  17  -1  -2  218.45    5.10
 -17  -1   2  234.57    5.74
  17  -1  -2  227.87    5.65
  17  -1  -2  227.38    5.43
  17  -1  -2  222.36    5.39
 -17  -1   2  222.47    5.47
 -17  -1   2  217.58    5.07
 -17  -1   2  223.34    5.50
  17   1  -2  232.10    5.74
  17   1  -2  242.59    5.80
 -17   1   2  227.26    6.03
  17   1  -2  233.35    5.24
 -17   1   2  223.90    5.74
 -17   1   2  231.19    6.13
 -17   1   2  249.15    6.00
 -17   1   2  232.46    5.93
 -17   1   2  225.79    5.39
  17   1  -2  232.39    5.71
 -15  -1   2   61.82    1.99
  15  -1  -2   55.67    1.57
 -15  -1   2   54.67    1.61
 -15  -1   2   59.89    2.08
  15  -1  -2   58.94    1.84
  15  -1  -2   57.46    1.96
 -15  -1   2   56.50    2.42
 -15  -1   2   62.67    1.92
  15  -1  -2   57.59    1.78
 -15   1   2   52.97    1.98
  15   1  -2   53.27    1.75
  15   1  -2   49.74    1.74
  15   1  -2   50.29    1.73
 -15   1   2   46.17    1.73
  15   1  -2   48.83    1.32
 -15   1   2   50.16    1.92
 -15   1   2   53.60    2.06
  13  -1  -2  490.23   10.85
 -13  -1   2  475.27   10.53
  13  -1  -2  483.84   10.67
 -13  -1   2  472.82   10.97
  13  -1  -2  476.98   10.59
 -13  -1   2  469.72   10.80
  13  -1  -2  480.57   10.44
 -13  -1   2  488.17   10.74
 -13   1   2  472.58   10.67
  13   1  -2  478.38   10.13
  13   1  -2  470.40   10.59
 -13   1   2  475.60   10.94
  13   1  -2  466.79   10.60
 -13   1   2  456.98   10.83
 -13   1   2  475.42   10.88
  13   1  -2  475.15   10.59
 -13   1   2  476.91   10.85
  11  -1  -2  147.38    3.58
 -11  -1   2  151.78    3.80
 -11  -1   2  145.12    3.71
  11  -1  -2  152.73    3.51
 -11  -1   2  149.42    3.26
  11  -1  -2  144.45    3.77
  11  -1  -2  145.72    3.67
 -11  -1   2  158.39    3.40
 -11  -1   2  158.78    4.02
 -11  -1   2  150.25    3.63
 -11   1   2  110.96    3.14
 -11   1   2  119.26    3.24
  11   1  -2  113.78    2.98
  11   1  -2  116.74    2.99
  11   1  -2  112.37    2.92
 -11   1   2  112.18    3.04
 -11   1   2  117.75    3.28
   9  -1  -2  249.89    5.83
  -9  -1   2  245.08    5.37
   9  -1  -2  250.14    5.62
  -9  -1   2  265.56    5.82
   9  -1  -2  250.81    5.74
  -9  -1   2  238.58    5.91
   9  -1  -2  248.62    5.60
  -9  -1   2  242.77    5.84
  -9  -1   2  261.30    5.79
  -9  -1   2  254.96    6.04
  -9   1   2  221.10    5.20
  -9   1   2  212.97    5.35
   9   1  -2  215.02    5.04
  -9   1   2  222.08    5.33
  -9   1   2  219.59    5.24
  -9   1   2  223.56    5.36
   9   1  -2  218.81    5.12
   9   1  -2  214.06    5.11
   7  -1  -2  216.29    5.00
  -7  -1   2  218.52    5.04
  -7  -1   2  212.69    4.97
  -7  -1   2  212.23    5.17
  -7  -1   2  212.29    5.03
   7  -1  -2  219.28    4.95
   7  -1  -2  209.47    4.79
   7  -1  -2  210.41    4.83
  -7  -1   2  214.26    4.98
  -7   1   2  195.83    4.63
  -7   1   2  198.35    4.77
   7   1  -2  201.23    4.48
   7   1  -2  194.57    4.55
   7   1  -2  191.20    4.58
  -7   1   2  186.11    4.72
  -7   1   2  195.09    4.76
  -7   1   2  194.85    4.65
   5  -1  -2  151.39    3.77
  -5  -1   2  159.54    3.90
  -5  -1   2  158.30    3.78
  -5  -1   2  161.87    3.96
   5  -1  -2  164.13    3.61
  -5  -1   2  167.15    3.80
   5  -1  -2  158.42    3.69
  -5  -1   2  150.40    3.82
  -5  -1   2  159.70    3.50
   5   1  -2  138.15    3.21
  -5   1   2  137.10    3.49
  -5   1   2  137.01    3.47
   5   1  -2  138.00    3.33
  -5   1   2  142.19    3.42
  -5   1   2  135.28    3.45
  -5   1   2  140.48    3.35
  -3  -1   2  626.43   13.68
  -3  -1   2  618.96   13.48
  -3  -1   2  624.06   13.77
   3  -1  -2  636.56   13.50
   3  -1  -2  645.14   13.67
   3  -1  -2  642.51   13.64
  -3  -1   2  634.10   13.73
   3  -1  -2  615.39   13.66
  -3   1   2  657.78   14.51
   3   1  -2  683.11   14.32
  -3   1   2  667.92   14.56
   3   1  -2  661.69   14.43
  -3   1   2  655.65   14.39
   3   1  -2  668.35   14.15
  -3   1   2  685.14   14.53
  -1  -1   2   46.05    1.37
   1  -1  -2   44.10    1.33
   1  -1  -2   46.22    1.21
  -1  -1   2   47.33    1.15
   1  -1  -2   47.89    1.36
  -1  -1   2   44.34    1.37
  -1  -1   2   43.77    1.27
  -1  -1   2   43.89    1.39
   1  -1  -2   45.97    1.34
  -1   1   2   42.25    1.17
   1   1  -2   43.13    1.05
   1   1  -2   42.27    1.24
  -1   1   2   42.71    1.30
  -1   1   2   41.79    1.30
  -1   1   2   44.35    1.29
  -1   1   2   42.08    1.26
  -1  -1  -2   13.52    0.68
   1  -1   2   14.15    0.68
   1  -1   2   13.14    0.71
  -1  -1  -2   15.27    0.76
  -1  -1  -2   14.77    0.69
  -1  -1  -2   15.47    0.63
  -1  -1  -2   14.31    0.59
   1  -1   2   15.01    0.93
   1  -1   2   15.29    0.68
   1  -1   2   14.18    0.70
  -1   1  -2   39.58    1.20
   1   1   2   41.14    1.10
   1   1   2   42.06    1.17
   1   1   2   40.11    1.15
   1   1   2   43.11    1.19
   1   1   2   39.84    1.22
  -1   1  -2   41.15    1.13
   3  -1   2  112.89    2.80
  -3  -1  -2  114.79    2.85
  -3  -1  -2  109.70    2.76
   3  -1   2  116.37    2.82
   3  -1   2  109.67    2.97
   3  -1   2  111.97    2.84
  -3  -1  -2  109.42    2.44
   3  -1   2  113.81    2.65
   3  -1   2  113.79    2.85
  -3  -1  -2  110.58    2.81
  -3   1  -2  130.94    3.00
   3   1   2  124.89    2.95
   3   1   2  130.80    2.94
  -3   1  -2  133.58    3.10
   3   1   2  124.83    2.93
  -3   1  -2  129.22    3.14
   3   1   2  136.35    3.09
  -3   1  -2  129.18    3.14
  -5  -1  -2  107.06    2.78
   5  -1   2  111.34    2.86
   5  -1   2  113.79    2.94
   5  -1   2  114.60    2.77
  -5  -1  -2  107.55    2.78
  -5  -1  -2  105.85    2.72
   5  -1   2  104.89    2.78
   5  -1   2  104.68    2.74
   5   1   2  130.36    3.07
  -5   1  -2  131.77    3.15
   5   1   2  130.01    2.94
  -5   1  -2  128.06    3.24
   5   1   2  129.98    2.87
  -5   1  -2  126.02    3.17
   5   1   2  132.63    3.33
  -5   1  -2  132.15    3.04
  -5   1  -2  129.97    3.16
   5   1   2  130.15    2.84
   5   1   2  130.21    2.89
   7  -1   2   69.92    1.94
   7  -1   2   70.22    1.98
  -7  -1  -2   67.99    1.95
  -7  -1  -2   68.46    1.92
   7  -1   2   61.94    2.00
  -7  -1  -2   62.91    1.89
   7  -1   2   68.32    1.92
  -7  -1  -2   64.76    1.58
   7  -1   2   67.38    2.04
   7   1   2  110.77    2.45
  -7   1  -2  109.62    2.69
  -7   1  -2  111.85    2.80
  -7   1  -2  110.89    2.88
   7   1   2  111.40    2.55
   7   1   2  111.08    2.92
   7   1   2  111.21    2.45
  -7   1  -2  111.65    2.79
   7   1   2  109.42    2.48
   9  -1   2   52.52    1.69
   9  -1   2   55.44    1.69
  -9  -1  -2   52.56    1.64
   9  -1   2   54.20    1.76
  -9  -1  -2   52.72    1.67
   9  -1   2   55.72    1.84
  -9  -1  -2   56.41    1.74
  -9   1  -2   62.73    1.82
   9   1   2   64.23    1.91
   9   1   2   62.70    1.49
  -9   1  -2   64.60    1.79
   9   1   2   63.48    1.59
   9   1   2   61.22    1.51
   9   1   2   62.57    1.59
  -9   1  -2   61.94    1.91
  -9   1  -2   61.98    1.49
  -9   1  -2   66.38    1.85
   9   1   2   62.79    1.52
 -11  -1  -2  310.37    7.15
  11  -1   2  310.38    7.16
  11  -1   2  307.12    7.14
 -11  -1  -2  299.73    7.02
  11  -1   2  312.70    7.14
  11  -1   2  318.59    7.14
  11  -1   2  304.59    7.30
 -11  -1  -2  304.64    7.14
  11   1   2  307.61    6.86
 -11   1  -2  306.68    6.71
 -11   1  -2  314.23    7.18
  11   1   2  318.16    6.89
 -11   1  -2  311.30    6.70
  11   1   2  309.96    6.84
 -11   1  -2  316.88    7.30
  11   1   2  315.93    6.95
 -11   1  -2  331.20    7.19
 -11   1  -2  308.69    7.19
  11   1   2  314.90    7.22
  11   1   2  319.16    7.23
  13  -1   2   27.09    1.21
  13  -1   2   27.57    1.18
  13  -1   2   25.55    1.30
 -13  -1  -2   26.62    1.10
  13  -1   2   27.00    1.20
  13  -1   2   28.52    1.17
 -13  -1  -2   27.32    1.22
  13   1   2   22.21    0.79
  13   1   2   21.38    0.77
 -13   1  -2   23.36    1.16
  13   1   2   24.93    1.08
  13   1   2   23.45    0.84
 -13   1  -2   19.88    1.03
  13   1   2   21.59    0.98
 -13   1  -2   23.48    1.09
 -13   1  -2   24.72    1.08
  13   1   2   23.14    0.86
  15  -1   2  392.24    9.13
 -15  -1  -2  393.55    8.83
  15  -1   2  388.64    9.21
  15  -1   2  394.65    8.91
  15  -1   2  398.31    9.04
 -15  -1  -2  382.88    8.71
  15  -1   2  393.14    9.04
  15   1   2  377.62    8.79
 -15   1  -2  373.39    8.75
  15   1   2  378.73    8.44
  15   1   2  382.18    8.68
  15   1   2  381.33    8.51
 -15   1  -2  361.32    8.86
 -15   1  -2  386.02    8.90
  15   1   2  378.90    8.45
  15   1   2  423.04    8.81
 -17  -1  -2   48.57    1.28
  17  -1   2   53.12    1.84
  17  -1   2   50.41    1.90
 -17  -1  -2   49.97    1.62
  17  -1   2   51.47    1.98
  17  -1   2   50.55    1.65
  17  -1   2   47.69    1.79
 -17  -1  -2   50.30    1.60
  17   1   2   42.38    1.48
  17   1   2   44.10    1.42
 -17   1  -2   42.31    1.72
  17   1   2   41.44    1.71
  17   1   2   42.42    1.36
 -17   1  -2   43.79    1.61
  17   1   2   43.77    1.38
  17   1   2   42.48    1.62
 -17   1  -2   44.57    1.79
 -19  -1  -2  127.76    3.03
  19  -1   2  133.59    3.65
  19  -1   2  128.92    3.35
  19  -1   2  125.83    3.74
  19  -1   2  132.52    3.81
 -19  -1  -2  130.02    3.35
 -19  -1  -2  128.54    3.31
  19   1   2  116.72    3.07
 -19   1  -2  121.79    3.49
  19   1   2  120.88    3.51
 -19   1  -2  119.24    3.33
 -19   1  -2  113.46    2.65
  19   1   2  116.11    3.09
 -19   1  -2  117.26    3.59
 -19   1  -2  119.79    3.85
  19   1   2  120.08    3.08
  19   1   2  118.70    3.36
  19   1   2  123.68    3.13
  21  -1   2  175.93    4.59
  21  -1   2  163.15    4.13
  21  -1   2  170.47    4.72
  21  -1   2  168.16    4.67
 -21  -1  -2  166.20    4.22
 -21  -1  -2  160.27    4.10
 -21  -1  -2  169.22    3.90
 -21   1  -2  145.85    3.32
  21   1   2  148.27    3.83
 -21   1  -2  154.35    4.02
  21   1   2  154.21    3.82
 -21   1  -2  147.48    4.04
  21   1   2  155.33    4.12
 -21   1  -2  145.85    4.36
  21   1   2  143.39    4.20
  21   1   2  144.15    3.72
 -21   1  -2  147.60    4.22
  23  -1   2   23.01    1.48
 -23  -1  -2   22.73    1.05
 -23  -1  -2   22.27    1.01
 -23  -1  -2   22.01    0.89
  23  -1   2   24.15    1.45
 -23  -1  -2   22.65    1.14
  23  -1   2   22.78    1.01
  23   1   2   16.50    1.12
 -23   1  -2   14.99    1.13
 -23   1  -2   17.39    1.53
  23   1   2   15.46    1.24
  23   1   2   15.70    0.83
  23   1   2   16.46    0.96
  23   1   2   16.01    0.96
 -23   1  -2   15.53    1.29
 -23   1  -2   15.41    0.57
 -25  -1  -2  142.57    3.80
  25  -1   2  141.99    4.23
 -25  -1  -2  137.03    3.40
  25  -1   2  141.08    3.55
 -25  -1  -2  140.94    3.57
  25  -1   2  142.66    4.31
 -25  -1  -2  140.54    3.44
  25   1   2  137.88    4.02
 -25   1  -2  139.13    4.02
  25   1   2  145.59    4.31
  25   1   2  137.50    3.49
 -25   1  -2  139.96    4.23
 -25   1  -2  138.17    4.36
  25   1   2  141.47    3.81
 -27  -1  -2   23.79    1.24
  27  -1   2   22.64    0.98
  27  -1   2   21.91    1.58
  27  -1   2   20.83    1.47
 -27  -1  -2   23.47    0.97
 -27  -1  -2   23.47    1.26
 -27  -1  -2   21.84    1.02
  27   1   2   27.27    1.02
 -27   1  -2   26.12    1.55
  27   1   2   27.04    1.64
  27   1   2   26.25    1.47
  27   1   2   24.77    1.31
 -27   1  -2   26.79    1.80
 -27   1  -2   26.32    1.72
 -29  -1  -2  125.82    3.58
 -29  -1  -2  127.54    3.17
  29  -1   2  125.60    4.00
  29  -1   2  117.65    4.05
 -29  -1  -2  122.73    3.18
  29  -1   2  122.28    3.13
 -29   1  -2  111.48    3.56
  29   1   2  113.82    2.79
  29   1   2  111.26    3.35
 -29   1  -2  107.36    3.76
  29   1   2  117.10    3.90
  29   1   2  111.13    3.57
 -29   1  -2  110.91    3.89
  31  -1   2   38.76    1.29
 -31  -1  -2   38.74    1.73
 -31  -1  -2   40.88    1.40
  31  -1   2   40.85    2.20
  31  -1   2   37.47    2.02
  31   1   2   58.17    2.63
 -31   1  -2   55.99    2.35
  31   1   2   55.32    2.30
 -31   1  -2   53.28    2.55
 -31   1  -2   54.83    2.66
  31   1   2   56.66    2.36
  33  -1   2   30.68    2.01
  33  -1   2   32.20    1.91
 -33  -1  -2   30.35    1.20
  33   1   2   46.54    2.18
 -33   1  -2   43.70    2.15
 -33   1  -2   44.31    2.46
  33   1   2   43.30    2.39
 -33   1  -2   46.53    2.39
  35  -1   2   76.54    3.26
  35  -1   2   73.05    3.03
 -35  -1  -2   75.43    2.16
  35   1   2   80.78    3.07
 -35   1  -2   74.86    2.95
  35   1   2   79.33    3.33
 -35   1  -2   86.78    3.35
 -35   1  -2   82.60    3.43
  37  -1   2    1.98    0.92
  37  -1   2    3.23    0.94
 -37  -1  -2    2.35    0.47
 -37   1  -2    3.94    1.06
 -37   1  -2    3.83    0.95
  37   1   2    5.66    1.02
 -37   1  -2    3.89    1.16
  37   1   2    5.74    1.16
  39  -1   2   48.58    2.74
  39  -1   2   48.41    2.54
  39   1   2   56.89    2.55
 -39   1  -2   50.28    2.80
  39   1   2   46.83    2.64
 -39   1  -2   53.82    2.40
  41  -1   2    0.97    0.81
  41  -1   2    1.70    0.92
 -41   1  -2    3.56    0.96
  41   1   2    3.80    1.15
 -41   1  -2    2.82    1.12
  41   1   2    1.38    0.82
  43  -1   2   44.25    2.65
  43  -1   2   36.92    2.37
  43   1   2   46.55    2.43
 -43   1  -2   47.44    2.89
 -43   1  -2   43.93    2.23
  43   1   2   47.03    2.82
  45  -1   2   10.89    1.58
  45  -1   2    9.87    1.62
  45   1   2   11.84    1.74
  45   1   2   14.35    1.80
 -45   1  -2   15.62    1.98
  45   1   2   11.72    1.49
 -45   1  -2   12.42    1.40
  47  -1   2   35.46    2.34
  47  -1   2   35.17    2.41
  47  -1   2   34.62    2.63
  47   1   2   38.62    2.30
 -47   1  -2   38.21    2.09
  47   1   2   35.40    2.57
  47   1   2   34.07    2.41
  49  -1   2   29.28    2.51
  49  -1   2   24.36    2.53
  49  -1   2   28.27    2.61
  49   1   2   17.75    2.13
 -49   1  -2   22.54    1.69
  49   1   2   23.16    2.08
  49   1   2   16.17    1.95
  51  -1   2    7.23    1.53
  51  -1   2    8.09    1.50
  51  -1   2   11.59    1.83
  51   1   2    6.95    1.49
  51   1   2    5.69    1.55
  53  -1   2   43.96    2.76
  53  -1   2   47.03    2.96
  53  -1   2   47.77    3.19
  53   1   2   36.25    2.76
  53   1   2   39.48    3.01
  55  -1   2    1.50    1.15
  55  -1   2    2.36    1.34
  55  -1   2    1.25    1.09
  55   1   2    1.06    1.26
  55   1   2    1.68    1.28
  57  -1   2   19.77    2.62
  57  -1   2   21.72    2.45
  57  -1   2   22.04    2.76
  57   1   2   21.95    2.64
  57   1   2   18.40    2.39
  59  -1   2   10.83    2.04
  59  -1   2   11.76    2.00
  59   1   2   11.35    1.95
  59   1   2   11.18    2.05
  61  -1   2    8.88    1.99
  61  -1   2   10.00    1.90
  61   1   2    8.42    1.93
  61   1   2    8.88    1.83
  62  -2  -2    4.07    1.43
  62  -2  -2    1.72    1.39
  62   2  -2    2.26    1.47
  62   2  -2    1.94    1.47
  60  -2  -2   15.30    2.36
  60  -2  -2   14.56    2.10
 -60   2   2   13.19    2.42
  60   2  -2   17.74    2.45
  60   2  -2   14.64    2.26
  58  -2  -2    6.35    1.75
  58  -2  -2    5.77    1.49
 -58   2   2    9.70    1.74
  58   2  -2   14.63    2.22
  58   2  -2   13.73    2.18
  56  -2  -2    2.83    1.53
  56  -2  -2    4.43    1.37
  56   2  -2    6.10    1.63
 -56   2   2    4.42    1.42
  56   2  -2    4.08    1.45
  54  -2  -2   31.32    2.98
  54  -2  -2   32.00    2.51
 -54   2   2   33.02    2.54
  54   2  -2   37.07    2.80
  54   2  -2   36.08    2.85
 -54   2   2   38.14    3.05
  52  -2  -2    7.21    1.43
  52  -2  -2    5.01    1.63
  52  -2  -2    7.55    1.42
 -52   2   2    3.97    1.68
  52   2  -2    7.57    1.64
  52   2  -2    5.79    1.51
 -52   2   2    7.24    1.62
  50  -2  -2   35.55    2.71
  50  -2  -2   34.90    2.37
  50  -2  -2   38.45    2.52
  50   2  -2   30.33    2.77
 -50   2   2   35.57    3.34
  50   2  -2   29.32    2.64
 -50   2   2   34.06    2.51
  48  -2  -2    4.54    1.24
  48  -2  -2    6.07    1.28
  48  -2  -2    4.76    1.38
 -48   2   2    1.78    1.22
 -48   2   2    0.37    1.28
  48   2  -2    3.65    1.18
  48   2  -2    2.56    1.20
  46  -2  -2   23.85    2.11
  46  -2  -2   27.58    2.71
  46  -2  -2   24.91    2.01
  46   2  -2   20.79    2.19
  46   2  -2   21.77    2.21
 -46   2   2   20.87    2.45
 -46   2   2   23.51    2.46
 -46   2   2   20.52    2.12
  44  -2  -2   52.85    3.06
  44  -2  -2   51.76    2.65
  44  -2  -2   47.87    2.56
  44   2  -2   54.23    2.99
 -44   2   2   53.05    3.22
 -44   2   2   50.57    2.67
 -44   2   2   48.66    3.07
 -44   2   2   53.45    2.85
  44   2  -2   52.42    2.86
  42  -2  -2    9.70    1.38
  42  -2  -2    8.52    1.60
  42  -2  -2    7.25    1.22
 -42  -2   2    9.41    1.02
 -42   2   2    7.10    1.55
  42   2  -2   10.08    1.54
 -42   2   2    9.73    1.82
  42   2  -2    7.86    1.38
 -42   2   2    9.24    1.46
 -42   2   2   11.80    1.39
  40  -2  -2   87.41    3.34
 -40  -2   2   88.40    2.89
  40  -2  -2   81.63    3.70
  40  -2  -2   86.54    3.37
  40   2  -2   92.39    3.75
  40   2  -2   84.73    3.64
 -40   2   2   91.73    3.31
 -40   2   2   88.56    4.07
 -40   2   2   88.18    3.63
 -40   2   2   87.26    3.89
  38  -2  -2    0.15    0.71
 -38  -2   2    0.93    0.64
 -38  -2   2    1.11    0.65
  38  -2  -2    1.14    0.72
  38  -2  -2    2.12    0.82
  38   2  -2    1.33    0.84
 -38   2   2    1.72    0.81
 -38   2   2    2.63    1.15
 -38   2   2    2.35    1.24
 -38   2   2    1.55    0.96
  38   2  -2    1.22    0.78
 -36  -2   2   67.39    2.40
 -36  -2   2   66.66    2.42
  36  -2  -2   62.83    2.70
  36  -2  -2   64.60    2.22
  36  -2  -2   66.55    3.11
  36  -2  -2   69.29    2.81
 -36   2   2   65.54    2.67
 -36   2   2   61.83    3.27
 -36   2   2   69.37    3.26
 -36   2   2   59.33    2.86
  36   2  -2   64.22    2.90
  36   2  -2   60.29    2.80
  34  -2  -2   42.35    2.18
 -34  -2   2   42.76    2.17
  34  -2  -2   42.66    2.11
  34  -2  -2   42.88    1.69
 -34  -2   2   43.71    1.86
 -34  -2   2   44.23    2.21
 -34  -2   2   45.59    1.93
  34   2  -2   42.10    2.29
  34   2  -2   46.47    2.38
 -34   2   2   46.21    2.82
 -34   2   2   47.09    2.61
 -34   2   2   42.79    2.29
  34   2  -2   43.05    1.62
 -34   2   2   41.89    2.10
  32  -2  -2   45.94    2.06
  32  -2  -2   43.08    1.68
 -32  -2   2   42.63    1.86
  32  -2  -2   44.10    2.33
 -32  -2   2   46.51    1.94
  32  -2  -2   47.44    2.19
 -32  -2   2   41.59    2.11
 -32  -2   2   42.80    2.14
 -32   2   2   45.60    2.42
 -32   2   2   47.70    2.18
 -32   2   2   47.35    2.82
  32   2  -2   49.52    2.35
 -32   2   2   47.00    2.59
  32   2  -2   48.21    2.38
  32   2  -2   45.25    1.64
 -30  -2   2   82.96    2.99
  30  -2  -2   87.49    3.32
 -30  -2   2   85.69    2.79
  30  -2  -2   81.65    3.00
  30  -2  -2   80.23    2.51
  30  -2  -2   78.80    2.84
 -30  -2   2   84.63    2.74
 -30  -2   2   83.29    3.06
 -30   2   2   93.42    3.24
  30   2  -2   94.06    2.62
 -30   2   2   95.04    3.48
  30   2  -2   97.00    3.45
 -30   2   2   89.43    3.87
  30   2  -2   96.27    3.40
 -30   2   2  103.86    3.78
 -30   2   2   97.11    3.55
 -30   2   2   89.83    2.53
  28  -2  -2   29.23    1.69
 -28  -2   2   29.77    1.64
 -28  -2   2   30.55    1.49
  28  -2  -2   30.17    1.78
 -28  -2   2   28.39    1.48
  28  -2  -2   29.08    1.54
  28  -2  -2   30.69    1.32
 -28  -2   2   28.89    1.64
 -28   2   2   30.81    1.95
[truncated: 2,085,277 more chars]
